# Supplementary material for: SARS-CoV-2 candidate vaccine ChAdOx1 nCoV-19 infection of human cell lines reveals a normal low range of viral backbone gene expression alongside very high levels of SARS-CoV-2 S glycoprotein expression.
Source: Research Square preprint supplement (doi:10.21203/rs.3.rs-94837/v1), 2020-10-20
Supplement: Supplementary file 1 [file 4537d50a54b9f8f81a489232.xlsx]

## Sheet: Proteins
Protein FDR Confidence	Accession	Description	Contaminant	Human+Chadox	Coverage	# Peptides	# PSMs	# Unique Peptides	Found in Sample: [S1] F1: 127N, Sample, Mock	Found in Sample: [S2] F1: 128C, Sample, 24	Found in Sample: [S3] F1: 129C, Sample, 48	Found in Sample: [S4] F1: 130C, Sample, 72	Modifications	Score Sequest HT
High	ENSP00000301740.8	pep chromosome:GRCh38:16:2752638:2771412:1 gene:ENSG00000167978.17 transcript:ENST00000301740.13 gene_biotype:protein_coding transcript_biotype:protein_coding gene_symbol:SRRM2 description:serine/arginine repetitive matrix 2 [Source:HGNC Symbol;Acc:HGNC:16639]	FALSE	TRUE	42.0058	120	439	118	High	High	High	High	Phospho [S202(99.2); S222(92.4); S231(100); T233(100); S250(93.7); S277(87.9); S295(94.7); Y335(90.6); S353(99.9); S398(97.2); S440(100); S456(94.8); S472(100); S474(98.8); T476(98.8); S484(100); S486(100); S562(100); S564(100); S566(100); T627(100); S629(100); S726(83.3); S728(90.2); S745(100); S746(100); S778(94.9); S801(100); S802(100); T848(99.7); T866(100); S871(100); T903(96.9); S914(95.7);…	700.68
High	ENSP00000296755.7	pep chromosome:GRCh38:5:72107475:72209565:1 gene:ENSG00000131711.15 transcript:ENST00000296755.12 gene_biotype:protein_coding transcript_biotype:protein_coding gene_symbol:MAP1B description:microtubule associated protein 1B [Source:HGNC Symbol;Acc:HGNC:6836]	FALSE	TRUE	27.4716	53	230	53	High	High	High	High	Phospho [S343(100); S561(99.8); S614(100); S832(96); S891(100); S937(94.5); S970(100); S995(100); S1016(100); T1067(100); S1154(99.1); S1208(99.9); S1247(91.9); S1265(100); T1282(100); S1298(99.8); S1389(100); S1400(100); S1427(100); S1443(99.9); S1501(99.5); T1633(99.9); T1788(100); Y1796(99.4); S1819(99.1); S1899(99.7); S1915(92.4); T1932(99.7); T1949(99.7); T2034(99.9); S2072(99.6); S2209(100)…	602.81
High	ENSP00000367263.4	pep chromosome:GRCh38:11:62515902:62546806:-1 gene:ENSG00000124942.14 transcript:ENST00000378024.9 gene_biotype:protein_coding transcript_biotype:protein_coding gene_symbol:AHNAK description:AHNAK nucleoprotein [Source:HGNC Symbol;Acc:HGNC:347]	FALSE	TRUE	18.5908	58	182	58	High	High	High	High	Phospho [S41(100); S93(100); S135(100); S177(96.1); S210(94); S216(100); S511(100); S559(95.9); S572(100); S1068(100); S2397(100); S3326(100); T3366(100); S3412(100); S3426(100); T3716(100); T4100(100); T4430(100); T4766(100); S4908(100); S5077(100); S5099(100); S5110(100); S5448(100); S5620(100); S5659(100); S5659(100); S5739(100); S5745(82.5); S5763(99.3); S5782(94.3); S5863(94.6); S5866(94.3);…	447.47
High	ENSP00000371462.1	pep chromosome:GRCh38:15:43510958:43531620:1 gene:ENSG00000166963.13 transcript:ENST00000382031.5 gene_biotype:protein_coding transcript_biotype:protein_coding gene_symbol:MAP1A description:microtubule associated protein 1A [Source:HGNC Symbol;Acc:HGNC:6835]	FALSE	TRUE	18.6452	41	166	41	High	High	High	High	Phospho [S359(95.2); S557(100); T742(100); S764(95.2); S843(100); T854(100); S882(100); S905(100); S1134(99.8); S1147(100); S1224(100); S1307(100); S1410(100); S1441(85.8); S1456(99.6); S1564(99.5); S1838(100); S1892(95.2); S2014(100); S2029(100); S2056(99.9); S2260(100); S2689(93.8); T2888(87.8); S2902(99.9)]	444.05
High	ENSP00000216181.5	pep chromosome:GRCh38:22:36281277:36388067:-1 gene:ENSG00000100345.21 transcript:ENST00000216181.10 gene_biotype:protein_coding transcript_biotype:protein_coding gene_symbol:MYH9 description:myosin heavy chain 9 [Source:HGNC Symbol;Acc:HGNC:7579]	FALSE	TRUE	30.3061	54	127	45	High	High	High	High	Phospho [Y721(100); S1714(92.1); S1943(100)]	385.3
High	ENSP00000356110.4	pep chromosome:GRCh38:1:205712822:205750182:-1 gene:ENSG00000069275.13 transcript:ENST00000367142.5 gene_biotype:protein_coding transcript_biotype:protein_coding gene_symbol:NUCKS1 description:nuclear casein kinase and cyclin dependent kinase substrate 1 [Source:HGNC Symbol;Acc:HGNC:29923]	FALSE	TRUE	63.786	20	150	20	High	High	High	High	Phospho [S19(100); S54(100); S58(100); S61(100); S79(100); S113(100); S144(99.6); S181(100); T202(100); S204(100); S214(100); S229(100)]	466.08
High	ENSP00000358866.3	pep chromosome:GRCh38:X:154348531:154374634:-1 gene:ENSG00000196924.17 transcript:ENST00000369850.10 gene_biotype:protein_coding transcript_biotype:protein_coding gene_symbol:FLNA description:filamin A [Source:HGNC Symbol;Acc:HGNC:3754]	FALSE	TRUE	24.5561	47	66	41	High	High	High	High	Phospho [S968(100); S1084(100); S1338(96.1); S1459(100); Y1616(95.8); S1630(99.6); S1734(100); S1835(93); S2152(100); S2180(100); S2327(99.2); S2370(94.4); S2577(99.4)]	176.42
High	ENSP00000326261.8	pep chromosome:GRCh38:1:24643302:24673281:1 gene:ENSG00000133226.17 transcript:ENST00000323848.14 gene_biotype:protein_coding transcript_biotype:protein_coding gene_symbol:SRRM1 description:serine and arginine repetitive matrix 1 [Source:HGNC Symbol;Acc:HGNC:16638]	FALSE	TRUE	43.3628	58	178	14	High	High	High	High	Phospho [S186(100); S187(100); S211(100); T220(100); S260(100); S308(96.2); S341(100); S343(100); S389(91.8); S393(99.9); S402(100); S414(92.1); T416(99.9); S429(100); S431(100); S450(100); S463(99); S501(92.1); S502(99.9); S530(99.6); S532(100); S549(100); S551(100); S562(92); T572(100); T574(100); T581(100); S583(100); S607(100); S616(99.8); S626(90); S636(99.9); S653(100); S675(100); S683(100)…	239.36
High	ENSP00000357206.3	pep chromosome:GRCh38:1:156668763:156677407:-1 gene:ENSG00000132688.11 transcript:ENST00000368223.4 gene_biotype:protein_coding transcript_biotype:protein_coding gene_symbol:NES description:nestin [Source:HGNC Symbol;Acc:HGNC:7756]	FALSE	TRUE	26.9587	27	107	27	High	High	High	High	Phospho [S352(98.2); S398(100); S471(99.5); S548(100); S578(100); S680(100); S702(100); S713(100); S746(99.9); S768(100); S905(100); S934(99.8); S1016(100); S1175(100); S1347(100); S1409(100); S1418(100); S1502(100); S1618(92.6)]	307.31
High	ENSP00000342112.4	pep chromosome:GRCh38:13:75620434:75859870:1 gene:ENSG00000136153.20 transcript:ENST00000341547.8 gene_biotype:protein_coding transcript_biotype:protein_coding gene_symbol:LMO7 description:LIM domain 7 [Source:HGNC Symbol;Acc:HGNC:6646]	FALSE	TRUE	23.7954	25	103	25	High	High	High	High	Phospho [S116(94.8); S246(89.1); S257(99.9); S260(86.8); T278(98.4); S345(91.4); S372(100); S417(92.7); S471(99.8); S533(98.7); S692(100); T714(92.6); S795(100); S1089(99.9); S1176(100); S1252(99.4); S1259(99.9); S1319(86.8)]	233.85
High	ENSP00000471084.1	pep chromosome:GRCh38:1:24643559:24669508:1 gene:ENSG00000133226.17 transcript:ENST00000596378.1 gene_biotype:protein_coding transcript_biotype:protein_coding gene_symbol:SRRM1 description:serine and arginine repetitive matrix 1 [Source:HGNC Symbol;Acc:HGNC:16638]	FALSE	TRUE	43.4655	45	138	1	High	High	High	High	Phospho [S147(100); S148(100); S172(100); T181(100); S221(100); S269(96.2); S302(100); S304(100); S350(91.8); S354(99.9); S363(100); S375(92.1); T377(99.9); S390(100); S392(100); S409(100); S422(99); S460(92.1); S461(99.9); S489(99.6); S491(100); S511(99.9); S522(100); S524(100); S535(92); T545(100); T547(100); T554(100); S556(100); S580(100); S589(99.8); S599(90); S609(99.9); S626(100); S648(100…	173.4
High	ENSP00000224237.5	pep chromosome:GRCh38:10:17229278:17237593:1 gene:ENSG00000026025.16 transcript:ENST00000224237.9 gene_biotype:protein_coding transcript_biotype:protein_coding gene_symbol:VIM description:vimentin [Source:HGNC Symbol;Acc:HGNC:12692]	FALSE	TRUE	67.382	31	58	31	High	High	High	High	Phospho [S5(100); S7(94.3); S51(99.7); S83(89.6); S214(100); S325(100); S420(88.5); S430(100); S459(100)]	171.44
High	ENSP00000295321.4	pep chromosome:GRCh38:2:127480812:127526489:-1 gene:ENSG00000163166.15 transcript:ENST00000295321.9 gene_biotype:protein_coding transcript_biotype:protein_coding gene_symbol:IWS1 description:interacts with SUPT6H, CTD assembly factor 1 [Source:HGNC Symbol;Acc:HGNC:25467]	FALSE	TRUE	36.2637	24	60	24	High	High	High	High	Phospho [S27(92.2); T53(81.2); S93(100); S95(100); S106(100); S108(100); S198(90.8); S248(98.9); S250(95.4); S289(91.1); S300(79.3); T317(87); S329(100); S333(100); S365(100); S377(100); S400(95.2); S415(100); S420(99.9); S440(100); S492(90.1); S492(90.1); S492(100); S492(100); S494(100); S494(100); S511(100); S513(100); S520(100); S520(100); S520(100); S520(100); S520(100); S520(100); S520(100);…	137.14
High	ENSP00000437271.1	pep chromosome:GRCh38:11:57299644:57322197:-1 gene:ENSG00000149115.14 transcript:ENST00000532437.1 gene_biotype:protein_coding transcript_biotype:protein_coding gene_symbol:TNKS1BP1 description:tankyrase 1 binding protein 1 [Source:HGNC Symbol;Acc:HGNC:19081]	FALSE	TRUE	19.5489	25	52	25	High	High	High	High	Phospho [S228(100); S435(99.4); S601(100); S672(100); S691(100); S836(100); S851(100); S893(100); S920(99.8); S1024(89.1); S1141(86.8); S1331(88.7); S1473(78.4); S1533(100); S1545(100); S1620(100); S1621(100); S1666(100)]	157.91
High	ENSP00000435210.1	pep chromosome:GRCh38:6:136256627:136289846:-1 gene:ENSG00000029363.17 transcript:ENST00000531224.6 gene_biotype:protein_coding transcript_biotype:protein_coding gene_symbol:BCLAF1 description:BCL2 associated transcription factor 1 [Source:HGNC Symbol;Acc:HGNC:16863]	FALSE	TRUE	22.2826	26	72	24	High	High	High	High	Phospho [S110(100); S112(100); S114(100); S119(100); S121(99.6); S147(80.8); Y150(88.2); S153(96.4); S177(100); S222(92.1); S264(99.5); S268(99.9); S290(92.3); S385(100); T402(100); S496(100); S512(94); S531(100); S648(100); S760(98.7); S884(93.5)]	130.4
High	ENSP00000360609.1	pep chromosome:GRCh38:6:44247866:44253883:1 gene:ENSG00000096384.20 transcript:ENST00000371554.2 gene_biotype:protein_coding transcript_biotype:protein_coding gene_symbol:HSP90AB1 description:heat shock protein 90 alpha family class B member 1 [Source:HGNC Symbol;Acc:HGNC:5258]	FALSE	TRUE	20.3039	15	41	10	High	High	High	High	Phospho [S226(100); S255(100)]	127.98
High	ENSP00000289371.5	pep chromosome:GRCh38:2:99337389:99401326:1 gene:ENSG00000158417.11 transcript:ENST00000289371.11 gene_biotype:protein_coding transcript_biotype:protein_coding gene_symbol:EIF5B description:eukaryotic translation initiation factor 5B [Source:HGNC Symbol;Acc:HGNC:30793]	FALSE	TRUE	8.68852	12	55	12	High	High	High	High	Phospho [S113(100); S135(100); S137(100); S164(100); S190(100); S214(100); S588(100); S589(100); S591(99.5)]	159.14
High	ENSP00000458162.1	pep chromosome:GRCh38:17:81509989:81512781:-1 gene:ENSG00000184009.12 transcript:ENST00000575842.5 gene_biotype:protein_coding transcript_biotype:protein_coding gene_symbol:ACTG1 description:actin gamma 1 [Source:HGNC Symbol;Acc:HGNC:144]	TRUE	TRUE	46.9333	15	43	6	High	High	High	High	Phospho [S365(100)]	157.63
High	ENSP00000318195.4	pep chromosome:GRCh38:2:231453531:231464484:-1 gene:ENSG00000115053.16 transcript:ENST00000322723.9 gene_biotype:protein_coding transcript_biotype:protein_coding gene_symbol:NCL description:nucleolin [Source:HGNC Symbol;Acc:HGNC:7667]	FALSE	TRUE	16.0563	10	46	10	High	High	High	High	Phospho [S41(98.6); S42(98.6); S67(99.7); S145(100); S153(100)]	152.95
High	ENSP00000407602.2	pep chromosome:GRCh38:3:47851094:48088841:-1 gene:ENSG00000047849.21 transcript:ENST00000426837.6 gene_biotype:protein_coding transcript_biotype:protein_coding gene_symbol:MAP4 description:microtubule associated protein 4 [Source:HGNC Symbol;Acc:HGNC:6862]	FALSE	TRUE	7.7057	17	89	17	High	High	High	High	Phospho [S297(94.4); S524(85.4); T538(100); S653(100); S770(100); S770(100); S770(100); S774(100); S774(100); S1679(93.2); S1932(99.8); S1970(99.3); S2073(100); T2087(95); S2218(100); S2296(99.9)]	182.7
High	ENSP00000335153.7	pep chromosome:GRCh38:14:102081049:102139686:-1 gene:ENSG00000080824.18 transcript:ENST00000334701.11 gene_biotype:protein_coding transcript_biotype:protein_coding gene_symbol:HSP90AA1 description:heat shock protein 90 alpha family class A member 1 [Source:HGNC Symbol;Acc:HGNC:5253]	FALSE	TRUE	20.2576	18	44	13	High	High	High	High	Phospho [S353(100); S385(100)]	112.83
High	ENSP00000299601.5	pep chromosome:GRCh38:15:51938025:51971778:-1 gene:ENSG00000166477.13 transcript:ENST00000299601.10 gene_biotype:protein_coding transcript_biotype:protein_coding gene_symbol:LEO1 description:LEO1 homolog, Paf1/RNA polymerase II complex component [Source:HGNC Symbol;Acc:HGNC:30401]	FALSE	TRUE	27.9279	20	52	20	High	High	High	High	Phospho [S38(100); S140(100); S151(93.8); S162(100); S171(100); T188(100); S197(100); S246(100); S254(100); S279(99.4); S296(94.3); S614(100); S630(99.6); S658(100)]	107.36
High	ENSP00000211998.4	pep chromosome:GRCh38:10:73998114:74120160:1 gene:ENSG00000035403.17 transcript:ENST00000211998.9 gene_biotype:protein_coding transcript_biotype:protein_coding gene_symbol:VCL description:vinculin [Source:HGNC Symbol;Acc:HGNC:12665]	FALSE	TRUE	14.0212	17	40	17	High	High	High	High	Phospho [S272(99.7); S290(100); S434(99.5); S566(100); T604(89); S721(92.4); S787(100); S795(98.4); Y822(99.5)]	95.05
High	ENSP00000424063.1	pep chromosome:GRCh38:5:179698417:179728907:1 gene:ENSG00000127022.15 transcript:ENST00000504734.5 gene_biotype:protein_coding transcript_biotype:protein_coding gene_symbol:CANX description:calnexin [Source:HGNC Symbol;Acc:HGNC:1473]	FALSE	TRUE	7.43243	6	72	6	High	High	High	High	Phospho [S564(100); S583(100)]	214.27
High	P12763	Alpha-2-HS-glycoprotein OS=Bos taurus GN=AHSG PE=1 SV=2	TRUE	FALSE	29.805	9	175	9	High	High	High	High	Phospho [S138(100); S325(98.8)]	384.67
High	ENSP00000493967.1	pep chromosome:GRCh38:2:217799588:218010421:-1 gene:ENSG00000079308.19 transcript:ENST00000646520.1 gene_biotype:protein_coding transcript_biotype:protein_coding gene_symbol:TNS1 description:tensin 1 [Source:HGNC Symbol;Acc:HGNC:11973]	FALSE	TRUE	10.1075	15	51	15	High	High	High	High	Phospho [S484(92.5); S902(100); S929(100); S1053(100); S1061(100); S1109(99.9); S1244(100); S1302(100); S1394(92); S1439(100); T1453(96.4); S1506(99.3); S1518(100)]	124.35
High	ENSP00000367044.1	pep chromosome:GRCh38:20:17613679:17682242:-1 gene:ENSG00000125844.16 transcript:ENST00000377813.6 gene_biotype:protein_coding transcript_biotype:protein_coding gene_symbol:RRBP1 description:ribosome binding protein 1 [Source:HGNC Symbol;Acc:HGNC:10448]	FALSE	TRUE	24.3972	18	35	18	High	High	High	High	Phospho [T235(100); S533(100); S573(99.4); S583(100); S615(100); T715(100); T715(100); T717(100); T717(100); T717(100); T717(100); S959(100); S1277(92.2)]	81.5
High	ENSP00000439020.2	pep chromosome:GRCh38:12:49184959:49188899:-1 gene:ENSG00000167552.14 transcript:ENST00000295766.9 gene_biotype:protein_coding transcript_biotype:protein_coding gene_symbol:TUBA1A description:tubulin alpha 1a [Source:HGNC Symbol;Acc:HGNC:20766]	FALSE	TRUE	45.4545	17	23	2	High	High	High	High	Phospho [S48(90.5); S439(100)]	76.8
High	ENSP00000371475.4	pep chromosome:GRCh38:15:43403061:43493171:-1 gene:ENSG00000067369.13 transcript:ENST00000382044.8 gene_biotype:protein_coding transcript_biotype:protein_coding gene_symbol:TP53BP1 description:tumor protein p53 binding protein 1 [Source:HGNC Symbol;Acc:HGNC:11999]	FALSE	TRUE	13.4041	16	35	16	High	High	High	High	Phospho [S270(100); S299(100); T326(94.2); S505(99.9); S528(99.4); S530(100); S557(100); S732(100); S791(87.4); S836(98); S839(100); T1060(99.4); S1119(91.7); S1367(100)]	91.48
High	ENSP00000323856.4	pep chromosome:GRCh38:8:143915153:143950876:-1 gene:ENSG00000178209.15 transcript:ENST00000322810.8 gene_biotype:protein_coding transcript_biotype:protein_coding gene_symbol:PLEC description:plectin [Source:HGNC Symbol;Acc:HGNC:9069]	FALSE	TRUE	3.58668	13	53	1	High	High	High	High	Phospho [S149(100); S720(100); S1435(100); S1721(100); S2578(100); T4030(100); S4386(99.9); S4408(98.8); S4622(99.6); S4626(100); S4670(98)]	92.81
High	ENSP00000344848.3	pep chromosome:GRCh38:8:143915147:143939590:-1 gene:ENSG00000178209.15 transcript:ENST00000345136.7 gene_biotype:protein_coding transcript_biotype:protein_coding gene_symbol:PLEC description:plectin [Source:HGNC Symbol;Acc:HGNC:9069]	FALSE	TRUE	3.58478	13	53	1	High	High	High	High	Phospho [S21(99.3); S583(100); S1298(100); S1584(100); S2441(100); T3893(100); S4249(99.9); S4271(98.8); S4485(99.6); S4489(100); S4533(98)]	92.42
High	ENSP00000436348.1	pep chromosome:GRCh38:6:130839353:131063258:-1 gene:ENSG00000079819.19 transcript:ENST00000527411.5 gene_biotype:protein_coding transcript_biotype:protein_coding gene_symbol:EPB41L2 description:erythrocyte membrane protein band 4.1 like 2 [Source:HGNC Symbol;Acc:HGNC:3379]	FALSE	TRUE	12.9412	12	46	12	High	High	High	High	Phospho [S39(100); S58(99.8); S87(96.8)]	91.96
High	ENSP00000355013.2	pep chromosome:GRCh38:11:10751246:10779746:1 gene:ENSG00000198730.9 transcript:ENST00000361367.7 gene_biotype:protein_coding transcript_biotype:protein_coding gene_symbol:CTR9 description:CTR9 homolog, Paf1/RNA polymerase II complex component [Source:HGNC Symbol;Acc:HGNC:16850]	FALSE	TRUE	12.7877	14	29	14	High	High	High	High	Phospho [T925(100); S941(100); S943(100); S970(100); S1072(100); S1085(99.5); S1097(89.5); S1147(98.6)]	75.37
High	ENSP00000416951.2	pep chromosome:GRCh38:16:88570403:88631398:1 gene:ENSG00000158545.15 transcript:ENST00000452588.6 gene_biotype:protein_coding transcript_biotype:protein_coding gene_symbol:ZC3H18 description:zinc finger CCCH-type containing 18 [Source:HGNC Symbol;Acc:HGNC:25091]	FALSE	TRUE	18.1167	18	39	18	High	High	High	High	Phospho [S46(100); S67(100); S83(100); S95(91.2); T162(100); S558(92); S576(93.8); S866(100)]	73.04
High	ENSP00000388806.3	pep chromosome:GRCh38:12:53006456:53040280:1 gene:ENSG00000063046.17 transcript:ENST00000420463.7 gene_biotype:protein_coding transcript_biotype:protein_coding gene_symbol:EIF4B description:eukaryotic translation initiation factor 4B [Source:HGNC Symbol;Acc:HGNC:3285]	FALSE	TRUE	22.5649	12	59	12	High	High	High	High	Phospho [S93(99.8); S131(100); S406(100); S409(99.9); S422(99); S425(98.1); S464(84.6); S494(93.6); S509(99.6); S602(100)]	136.78
High	ENSP00000357283.4	pep chromosome:GRCh38:1:156114711:156140081:1 gene:ENSG00000160789.20 transcript:ENST00000368300.9 gene_biotype:protein_coding transcript_biotype:protein_coding gene_symbol:LMNA description:lamin A/C [Source:HGNC Symbol;Acc:HGNC:6636]	FALSE	TRUE	21.8373	14	46	13	High	High	High	High	Phospho [S22(87.9); S66(99.7); S303(94.6); S392(94.1); S406(88.6); S458(99.9)]	85.54
High	ENSP00000324173.6	pep chromosome:GRCh38:9:125234853:125241343:-1 gene:ENSG00000044574.8 transcript:ENST00000324460.7 gene_biotype:protein_coding transcript_biotype:protein_coding gene_symbol:HSPA5 description:heat shock protein family A (Hsp70) member 5 [Source:HGNC Symbol;Acc:HGNC:5238]	FALSE	TRUE	33.4862	18	28	15	High	High	High	High	Phospho [T648(100)]	89.29
High	ENSP00000229239.5	pep chromosome:GRCh38:12:6534517:6538371:1 gene:ENSG00000111640.15 transcript:ENST00000229239.10 gene_biotype:protein_coding transcript_biotype:protein_coding gene_symbol:GAPDH description:glyceraldehyde-3-phosphate dehydrogenase [Source:HGNC Symbol;Acc:HGNC:4141]	FALSE	TRUE	54.3284	14	24	14	High	High	High	High	Phospho [T184(100); S192(100); S210(92.7)]	74.31
High	ENSP00000346032.3	pep chromosome:GRCh38:15:60347332:60397985:-1 gene:ENSG00000182718.16 transcript:ENST00000332680.8 gene_biotype:protein_coding transcript_biotype:protein_coding gene_symbol:ANXA2 description:annexin A2 [Source:HGNC Symbol;Acc:HGNC:537]	FALSE	TRUE	50.9804	18	22	18	High	High	High	High	Phospho [S30(99.2)]	67.33
High	ENSP00000334983.5	pep chromosome:GRCh38:15:72199029:72231190:-1 gene:ENSG00000067225.18 transcript:ENST00000335181.10 gene_biotype:protein_coding transcript_biotype:protein_coding gene_symbol:PKM description:pyruvate kinase M1/2 [Source:HGNC Symbol;Acc:HGNC:9021]	FALSE	TRUE	39.1714	20	22	20	High	High	High	High	Phospho [S37(100); S57(100); S249(100)]	52.8
High	ENSP00000365175.4	pep chromosome:GRCh38:6:31620720:31637771:1 gene:ENSG00000204469.13 transcript:ENST00000376007.8 gene_biotype:protein_coding transcript_biotype:protein_coding gene_symbol:PRRC2A description:proline rich coiled-coil 2A [Source:HGNC Symbol;Acc:HGNC:13918]	FALSE	TRUE	10.5239	17	35	17	High	High	High	High	Phospho [S350(100); S363(93); S380(100); S456(95); T610(93.1); S761(96.1); T782(100); Y1013(92.6); S1089(99.4); T1108(88.9); S1110(95.6); S1147(100); S1219(100); S1306(99.8); S1435(100); S1670(94.1)]	66
High	ENSP00000389639.1	pep chromosome:GRCh38:1:42682987:42702349:1 gene:ENSG00000065978.19 transcript:ENST00000436427.1 gene_biotype:protein_coding transcript_biotype:protein_coding gene_symbol:YBX1 description:Y-box binding protein 1 [Source:HGNC Symbol;Acc:HGNC:8014]	FALSE	TRUE	19.2513	5	33	5	High	High	High	High	Phospho [S215(99.7); S224(95.4); S364(100)]	102.29
High	ENSP00000443475.1	pep chromosome:GRCh38:12:49227926:49273334:1 gene:ENSG00000167553.15 transcript:ENST00000541364.5 gene_biotype:protein_coding transcript_biotype:protein_coding gene_symbol:TUBA1C description:tubulin alpha 1c [Source:HGNC Symbol;Acc:HGNC:20768]	FALSE	TRUE	39.1137	16	21	1	High	High	High	High	Phospho [S118(90.5); S509(100)]	63.23
High	ENSP00000308227.4	pep chromosome:GRCh38:6:34236873:34246231:1 gene:ENSG00000137309.19 transcript:ENST00000311487.9 gene_biotype:protein_coding transcript_biotype:protein_coding gene_symbol:HMGA1 description:high mobility group AT-hook 1 [Source:HGNC Symbol;Acc:HGNC:5010]	FALSE	TRUE	41.1215	5	60	5	High	High	High	High	Phospho [S36(93.2); T53(91.4); S102(99.8)]	148.99
High	ENSP00000362638.4	pep chromosome:GRCh38:1:32333839:32336233:-1 gene:ENSG00000175130.7 transcript:ENST00000329421.8 gene_biotype:protein_coding transcript_biotype:protein_coding gene_symbol:MARCKSL1 description:MARCKS like 1 [Source:HGNC Symbol;Acc:HGNC:7142]	FALSE	TRUE	55.3846	6	29	6	High	High	High	High	Phospho [S22(100); S104(100); T148(100); S180(90.4)]	92.67
High	ENSP00000367542.3	pep chromosome:GRCh38:9:35681993:35690056:-1 gene:ENSG00000198467.15 transcript:ENST00000378292.9 gene_biotype:protein_coding transcript_biotype:protein_coding gene_symbol:TPM2 description:tropomyosin 2 [Source:HGNC Symbol;Acc:HGNC:12011]	FALSE	TRUE	48.9437	20	24	7	High	High	High	High	Phospho [S87(100)]	59.99
High	ENSP00000301785.5	pep chromosome:GRCh38:11:62712630:62727457:-1 gene:ENSG00000214753.4 transcript:ENST00000301785.7 gene_biotype:protein_coding transcript_biotype:protein_coding gene_symbol:HNRNPUL2 description:heterogeneous nuclear ribonucleoprotein U like 2 [Source:HGNC Symbol;Acc:HGNC:25451]	FALSE	TRUE	6.15797	5	28	5	High	High	High	High	Phospho [S161(100); S185(100)]	86.84
High	ENSP00000433825.1	pep chromosome:GRCh38:1:36224432:36304148:1 gene:ENSG00000054118.15 transcript:ENST00000469141.6 gene_biotype:protein_coding transcript_biotype:protein_coding gene_symbol:THRAP3 description:thyroid hormone receptor associated protein 3 [Source:HGNC Symbol;Acc:HGNC:22964]	FALSE	TRUE	17.6963	23	47	21	High	High	High	High	Phospho [S55(92.3); S125(100); S127(100); S129(100); S243(100); S248(100); S320(100); T381(98.9); S535(94.8); S672(100); S698(100); S743(99.7); S746(99.2); S917(94.1); S939(100)]	58.02
High	ENSP00000498253.1	pep chromosome:GRCh38:17:17042759:17192647:1 gene:ENSG00000133030.21 transcript:ENST00000651222.1 gene_biotype:protein_coding transcript_biotype:protein_coding gene_symbol:MPRIP description:myosin phosphatase Rho interacting protein [Source:HGNC Symbol;Acc:HGNC:30321]	FALSE	TRUE	7.13402	11	21	11	High	High	High	High	Phospho [S220(100); S269(100); S289(100); S292(87.1); S305(94.5); S316(100); S419(100); S483(100); S737(100); S2364(88.3); S2380(99.2)]	64.14
High	ENSP00000357189.5	pep chromosome:GRCh38:1:156743345:156752448:-1 gene:ENSG00000143321.19 transcript:ENST00000368206.5 gene_biotype:protein_coding transcript_biotype:protein_coding gene_symbol:HDGF description:heparin binding growth factor [Source:HGNC Symbol;Acc:HGNC:4856]	FALSE	TRUE	18.75	10	30	10	High	High	High	High	Phospho [S149(100); S181(100); S218(91.2)]	57.35
High	ENSP00000338161.4	pep chromosome:GRCh38:1:243125164:243200814:-1 gene:ENSG00000143702.16 transcript:ENST00000336415.8 gene_biotype:protein_coding transcript_biotype:protein_coding gene_symbol:CEP170 description:centrosomal protein 170 [Source:HGNC Symbol;Acc:HGNC:28920]	FALSE	TRUE	12.3877	15	32	15	High	High	High	High	Phospho [S261(100); S281(100); S375(99.4); S430(81.4); T804(95.6); S897(90.8); S1023(81); S1076(95.5); S1124(97.8); S1129(95.6); S1203(92.5); T1204(92.5)]	71.89
High	ENSP00000489752.1	pep chromosome:GRCh38:2:73073382:73112783:-1 gene:ENSG00000135631.16 transcript:ENST00000486777.6 gene_biotype:protein_coding transcript_biotype:protein_coding gene_symbol:RAB11FIP5 description:RAB11 family interacting protein 5 [Source:HGNC Symbol;Acc:HGNC:24845]	FALSE	TRUE	11.5559	13	39	13	High	High	High	High	Phospho [S188(100); S307(100); S357(91.1); S376(100); S395(83.6); S482(100); S634(99.8); S640(100); T869(93.1); S913(99.7); S938(94.8)]	66.41
High	ENSP00000336721.4	pep chromosome:GRCh38:5:154712843:154817605:1 gene:ENSG00000155506.17 transcript:ENST00000336314.9 gene_biotype:protein_coding transcript_biotype:protein_coding gene_symbol:LARP1 description:La ribonucleoprotein domain family member 1 [Source:HGNC Symbol;Acc:HGNC:29531]	FALSE	TRUE	11.4818	10	33	1	High	High	High	High	Phospho [S148(99.5); S444(100); T449(99.3); S471(99.2); S550(99.9); S689(99.5); S697(99.5); T711(92.8)]	65.73
High	ENSP00000327145.8	pep chromosome:GRCh38:7:128830377:128859272:1 gene:ENSG00000128591.15 transcript:ENST00000325888.12 gene_biotype:protein_coding transcript_biotype:protein_coding gene_symbol:FLNC description:filamin C [Source:HGNC Symbol;Acc:HGNC:3756]	FALSE	TRUE	9.54128	17	20	13	High	High	High	High	Phospho [S1527(100); S1728(100); T1970(96.6); S2182(93.7); S2233(100); Y2625(84.8)]	44.39
High	ENSP00000322419.4	pep chromosome:GRCh38:11:809967:812876:1 gene:ENSG00000177600.9 transcript:ENST00000321153.9 gene_biotype:protein_coding transcript_biotype:protein_coding gene_symbol:RPLP2 description:ribosomal protein lateral stalk subunit P2 [Source:HGNC Symbol;Acc:HGNC:10377]	FALSE	TRUE	56.5217	5	74	5	High	High	High	High	Phospho [S86(100); S105(91.9)]	147.47
High	ENSP00000302139.4	pep chromosome:GRCh38:5:150640660:150659207:1 gene:ENSG00000171992.13 transcript:ENST00000307662.5 gene_biotype:protein_coding transcript_biotype:protein_coding gene_symbol:SYNPO description:synaptopodin [Source:HGNC Symbol;Acc:HGNC:30672]	FALSE	TRUE	24.1417	15	31	7	High	High	High	High	Phospho [S19(100); T217(99.6); S281(85.1); S292(100); S441(100); Y641(83.1); S736(99); S784(100); S826(100); S871(95.6); S894(100)]	78.21
High	ENSP00000428589.1	pep chromosome:GRCh38:5:154755575:154804208:1 gene:ENSG00000155506.17 transcript:ENST00000518297.5 gene_biotype:protein_coding transcript_biotype:protein_coding gene_symbol:LARP1 description:La ribonucleoprotein domain family member 1 [Source:HGNC Symbol;Acc:HGNC:29531]	FALSE	TRUE	15.9509	10	27	1	High	High	High	High	Phospho [S90(100); S225(99.5); S521(100); T526(99.3); S548(99.2); S627(99.9); S766(99.5); S774(99.5); T788(92.8)]	69.77
High	ENSP00000363654.3	pep chromosome:GRCh38:9:109780309:110172512:1 gene:ENSG00000157654.18 transcript:ENST00000374530.7 gene_biotype:protein_coding transcript_biotype:protein_coding gene_symbol:PALM2-AKAP2 description:PALM2-AKAP2 fusion [Source:HGNC Symbol;Acc:HGNC:33529]	FALSE	TRUE	14.1432	10	32	10	High	High	High	High	Phospho [S155(99.8); S352(99.4); T388(76); S624(100); S696(95.1); S951(100); S979(100); S1083(100)]	90.79
High	ENSP00000299767.4	pep chromosome:GRCh38:12:103930410:103947926:1 gene:ENSG00000166598.15 transcript:ENST00000299767.10 gene_biotype:protein_coding transcript_biotype:protein_coding gene_symbol:HSP90B1 description:heat shock protein 90 beta family member 1 [Source:HGNC Symbol;Acc:HGNC:12028]	FALSE	TRUE	20.4234	14	21	14	High	High	High	High	Phospho [S306(100)]	66.1
High	ENSP00000341483.5	pep chromosome:GRCh38:19:5916139:5978140:-1 gene:ENSG00000031823.14 transcript:ENST00000340578.10 gene_biotype:protein_coding transcript_biotype:protein_coding gene_symbol:RANBP3 description:RAN binding protein 3 [Source:HGNC Symbol;Acc:HGNC:9850]	FALSE	TRUE	20.9877	6	22	5	High	High	High	High	Phospho [S27(100); S100(99.9); S108(100); S244(100); S333(100); S355(94.4); S533(100); S539(100)]	71.24
High	ENSP00000486285.1	pep chromosome:GRCh38:13:98143098:98449771:1 gene:ENSG00000152767.17 transcript:ENST00000627049.2 gene_biotype:protein_coding transcript_biotype:protein_coding gene_symbol:FARP1 description:FERM, ARH/RhoGEF and pleckstrin domain protein 1 [Source:HGNC Symbol;Acc:HGNC:3591]	FALSE	TRUE	8.829	8	16	5	High	High	High	High	Phospho [T24(94.4); S427(100); S433(100); S510(100); S903(93.4); S920(100); S930(89.3)]	62.81
High	ENSP00000338095.6	pep chromosome:GRCh38:14:21209136:21269494:-1 gene:ENSG00000092199.17 transcript:ENST00000336053.10 gene_biotype:protein_coding transcript_biotype:protein_coding gene_symbol:HNRNPC description:heterogeneous nuclear ribonucleoprotein C (C1/C2) [Source:HGNC Symbol;Acc:HGNC:5035]	FALSE	TRUE	18.0556	4	22	1	High	High	High	High	Phospho [S228(95.2); S247(100)]	71.17
High	ENSP00000478061.1	pep chromosome:GRCh38:6:113857345:113863475:1 gene:ENSG00000277443.3 transcript:ENST00000612661.2 gene_biotype:protein_coding transcript_biotype:protein_coding gene_symbol:MARCKS description:myristoylated alanine rich protein kinase C substrate [Source:HGNC Symbol;Acc:HGNC:6759]	FALSE	TRUE	25.6024	5	34	5	High	High	High	High	Phospho [S101(100); S118(87.2); T150(100)]	74.69
High	ENSP00000263847.1	pep chromosome:GRCh38:11:59574398:59615774:-1 gene:ENSG00000110048.12 transcript:ENST00000263847.6 gene_biotype:protein_coding transcript_biotype:protein_coding gene_symbol:OSBP description:oxysterol binding protein [Source:HGNC Symbol;Acc:HGNC:8503]	FALSE	TRUE	10.4089	6	16	6	High	High	High	High	Phospho [S190(100); S193(100); S240(98.5); S351(100); S379(94); S382(99.6)]	62.21
High	ENSP00000193403.6	pep chromosome:GRCh38:14:68874143:68979440:-1 gene:ENSG00000072110.13 transcript:ENST00000193403.10 gene_biotype:protein_coding transcript_biotype:protein_coding gene_symbol:ACTN1 description:actinin alpha 1 [Source:HGNC Symbol;Acc:HGNC:163]	FALSE	TRUE	22.1973	14	15	10	High	High	High	High	Phospho [S140(100)]	41.66
High	ENSP00000452276.1	pep chromosome:GRCh38:14:21210937:21269425:-1 gene:ENSG00000092199.17 transcript:ENST00000557201.5 gene_biotype:protein_coding transcript_biotype:protein_coding gene_symbol:HNRNPC description:heterogeneous nuclear ribonucleoprotein C (C1/C2) [Source:HGNC Symbol;Acc:HGNC:5035]	FALSE	TRUE	25.1634	6	26	3	High	High	High	High	Phospho [S241(95.2); S260(100); S299(100)]	72.9
High	ENSP00000362441.4	pep chromosome:GRCh38:X:77504878:77786216:-1 gene:ENSG00000085224.22 transcript:ENST00000373344.10 gene_biotype:protein_coding transcript_biotype:protein_coding gene_symbol:ATRX description:ATRX chromatin remodeler [Source:HGNC Symbol;Acc:HGNC:886]	FALSE	TRUE	6.05939	11	25	11	High	High	High	High	Phospho [Y89(86.8); S675(99.9); S677(100); S729(91.6); S849(84.5); S850(84.5); S875(100); S876(100); S974(100); T977(100); S978(100); S1073(100); S1076(93.2); S1348(100); S1352(100); T1989(92.2); S1990(92.2)]	73.14
High	ENSP00000254029.3	pep chromosome:GRCh38:X:118346106:118449961:1 gene:ENSG00000131725.14 transcript:ENST00000254029.8 gene_biotype:protein_coding transcript_biotype:protein_coding gene_symbol:WDR44 description:WD repeat domain 44 [Source:HGNC Symbol;Acc:HGNC:30512]	FALSE	TRUE	18.5104	12	19	12	High	High	High	High	Phospho [S50(100); S96(100); T219(100); S262(100); S403(100); S470(98.8); S471(99); S472(98.8); S561(100); S582(99.3)]	49.77
High	ENSP00000484535.2	pep chromosome:GRCh38:CHR_HSCHR15_4_CTG8:29850002:29972346:-1 gene:ENSG00000277401.4 transcript:ENST00000621049.4 gene_biotype:protein_coding transcript_biotype:protein_coding gene_symbol:TJP1 description:tight junction protein 1 [Source:HGNC Symbol;Acc:HGNC:11827]	FALSE	TRUE	10.4638	12	23	12	High	High	High	High	Phospho [S125(100); S131(89.7); S166(100); S168(100); S277(100); S300(100); S303(100); S617(100); T840(77.9); T854(80.6); T868(99.9); S1278(99.7)]	66.33
High	ENSP00000377195.1	pep chromosome:GRCh38:5:177456936:177473637:-1 gene:ENSG00000113758.13 transcript:ENST00000393565.5 gene_biotype:protein_coding transcript_biotype:protein_coding gene_symbol:DBN1 description:drebrin 1 [Source:HGNC Symbol;Acc:HGNC:2695]	FALSE	TRUE	16.6906	6	45	6	High	High	High	High	Phospho [S142(95); S342(91.3); S383(99.8); S427(99.9); S647(98.2)]	87.35
High	ENSP00000262854.6	pep chromosome:GRCh38:X:53532096:53686719:-1 gene:ENSG00000086758.16 transcript:ENST00000262854.11 gene_biotype:protein_coding transcript_biotype:protein_coding gene_symbol:HUWE1 description:HECT, UBA and WWE domain containing E3 ubiquitin protein ligase 1 [Source:HGNC Symbol;Acc:HGNC:30892]	FALSE	TRUE	4.27526	9	22	9	High	High	High	High	Phospho [S1395(100); S1907(100); S2362(91.8); S2377(98.9); S2887(91.6); S2918(99.9); S3662(99.9); S3816(77.8); S3919(100)]	60.99
High	ENSP00000387365.3	pep chromosome:GRCh38:12:107685799:107713162:1 gene:ENSG00000136045.12 transcript:ENST00000412830.8 gene_biotype:protein_coding transcript_biotype:protein_coding gene_symbol:PWP1 description:PWP1 homolog, endonuclein [Source:HGNC Symbol;Acc:HGNC:17015]	FALSE	TRUE	5.38922	2	16	2	High	High	High	High	Phospho [S50(100); S57(99.9)]	76.72
High	ENSP00000296043.6	pep chromosome:GRCh38:4:76435229:76783253:1 gene:ENSG00000138771.16 transcript:ENST00000296043.7 gene_biotype:protein_coding transcript_biotype:protein_coding gene_symbol:SHROOM3 description:shroom family member 3 [Source:HGNC Symbol;Acc:HGNC:30422]	FALSE	TRUE	7.96593	12	27	12	High	High	High	High	Phospho [S285(90.1); S425(89.2); T576(100); S582(90); S816(99); T817(91.1); S910(100); T1012(100); S1221(100); S1441(99.4); S1497(84.7)]	63.39
High	ENSP00000367265.4	pep chromosome:GRCh38:12:106237881:106248020:-1 gene:ENSG00000136026.14 transcript:ENST00000378026.5 gene_biotype:protein_coding transcript_biotype:protein_coding gene_symbol:CKAP4 description:cytoskeleton associated protein 4 [Source:HGNC Symbol;Acc:HGNC:16991]	FALSE	TRUE	19.103	9	14	9	High	High	High	High	Phospho [S17(100); S26(100); S232(92); S461(94.1)]	40.18
High	ENSP00000451328.1	pep chromosome:GRCh38:14:23059059:23095383:-1 gene:ENSG00000100813.14 transcript:ENST00000555053.5 gene_biotype:protein_coding transcript_biotype:protein_coding gene_symbol:ACIN1 description:apoptotic chromatin condensation inducer 1 [Source:HGNC Symbol;Acc:HGNC:17066]	FALSE	TRUE	11.9729	13	23	2	High	High	High	High	Phospho [S216(95.6); S240(99.2); S388(99.9); S490(100); S605(100); S710(89.9); S825(100); S837(100); S885(99.8)]	50.11
High	ENSP00000234590.4	pep chromosome:GRCh38:1:8861000:8878686:-1 gene:ENSG00000074800.16 transcript:ENST00000234590.10 gene_biotype:protein_coding transcript_biotype:protein_coding gene_symbol:ENO1 description:enolase 1 [Source:HGNC Symbol;Acc:HGNC:3350]	FALSE	TRUE	34.7926	14	16	14	High	High	High	High	Phospho [T41(99.2)]	41.15
High	ENSP00000353452.3	pep chromosome:GRCh38:3:123612298:123876618:-1 gene:ENSG00000065534.18 transcript:ENST00000360304.7 gene_biotype:protein_coding transcript_biotype:protein_coding gene_symbol:MYLK description:myosin light chain kinase [Source:HGNC Symbol;Acc:HGNC:7590]	FALSE	TRUE	5.48589	10	35	10	High	High	High	High	Phospho [S365(100); T883(100); S911(100); S947(100); S1438(100); S1776(99.7)]	66.83
High	ENSP00000379281.3	pep chromosome:GRCh38:8:100920630:100950557:-1 gene:ENSG00000164924.18 transcript:ENST00000395951.7 gene_biotype:protein_coding transcript_biotype:protein_coding gene_symbol:YWHAZ description:tyrosine 3-monooxygenase/tryptophan 5-monooxygenase activation protein zeta [Source:HGNC Symbol;Acc:HGNC:12855]	FALSE	TRUE	51.0204	10	16	7	High	High	High	High	Phospho [S207(100); T232(100)]	51.54
High	ENSP00000496166.1	pep chromosome:GRCh38:16:30065760:30070420:1 gene:ENSG00000149925.20 transcript:ENST00000642816.2 gene_biotype:protein_coding transcript_biotype:protein_coding gene_symbol:ALDOA description:aldolase, fructose-bisphosphate A [Source:HGNC Symbol;Acc:HGNC:414]	FALSE	TRUE	26.555	10	18	8	High	High	High	High	Phospho [S90(94.5); S100(100)]	40.55
High	ENSP00000222968.4	pep chromosome:GRCh38:7:99394673:99408597:-1 gene:ENSG00000106244.13 transcript:ENST00000350498.8 gene_biotype:protein_coding transcript_biotype:protein_coding gene_symbol:PDAP1 description:PDGFA associated protein 1 [Source:HGNC Symbol;Acc:HGNC:14634]	FALSE	TRUE	11.6022	4	27	4	High	High	High	High	Phospho [S63(100)]	82.4
High	ENSP00000437073.1	pep chromosome:GRCh38:17:29071124:29180412:-1 gene:ENSG00000196535.16 transcript:ENST00000527372.6 gene_biotype:protein_coding transcript_biotype:protein_coding gene_symbol:MYO18A description:myosin XVIIIA [Source:HGNC Symbol;Acc:HGNC:31104]	FALSE	TRUE	2.87244	8	17	8	High	High	High	High	Phospho [S1970(100); S1974(100); S1998(100); S2007(99); S2043(99.8)]	57.32
High	ENSP00000495843.2	pep chromosome:GRCh38:CHR_HG30_PATCH:179821758:179838931:1 gene:ENSG00000284099.3 transcript:ENST00000643389.2 gene_biotype:protein_coding transcript_biotype:protein_coding gene_symbol:AC008393.2 description:sequestosome 1 [Source:NCBI gene;Acc:8878]	FALSE	TRUE	24.0909	5	15	5	High	High	High	High	Phospho [S24(99.3); T269(100); S328(97); S332(97); S366(91.7)]	54.05
High	ENSP00000333938.7	pep chromosome:GRCh38:1:77888628:77943224:1 gene:ENSG00000162614.18 transcript:ENST00000334785.11 gene_biotype:protein_coding transcript_biotype:protein_coding gene_symbol:NEXN description:nexilin F-actin binding protein [Source:HGNC Symbol;Acc:HGNC:29557]	FALSE	TRUE	14.0741	8	38	8	High	High	High	High	Phospho [S80(100); S226(100); S243(100); Y361(88.4); S365(100); S442(100); S564(83.7)]	95.3
High	ENSP00000455823.1	pep chromosome:GRCh38:1:39084062:39487177:1 gene:ENSG00000127603.27 transcript:ENST00000567887.5 gene_biotype:protein_coding transcript_biotype:protein_coding gene_symbol:MACF1 description:microtubule actin crosslinking factor 1 [Source:HGNC Symbol;Acc:HGNC:13664]	FALSE	TRUE	1.68599	8	16	8	High	High	High	High	Phospho [S312(100); S1410(90.2); S2038(99.8); S3959(99.7); S5733(100); S5949(100); S7534(99.8)]	47.73
High	ENSP00000398632.2	pep chromosome:GRCh38:11:35138870:35232402:1 gene:ENSG00000026508.18 transcript:ENST00000428726.7 gene_biotype:protein_coding transcript_biotype:protein_coding gene_symbol:CD44 description:CD44 molecule (Indian blood group) [Source:HGNC Symbol;Acc:HGNC:1681]	FALSE	TRUE	9.83827	6	28	6	High	High	High	High	Phospho [S184(93.2); S697(100); S706(100); T720(100)]	61.67
High	ENSP00000434070.1	pep chromosome:GRCh38:8:143579728:143590460:-1 gene:ENSG00000104529.17 transcript:ENST00000532741.5 gene_biotype:protein_coding transcript_biotype:protein_coding gene_symbol:EEF1D description:eukaryotic translation elongation factor 1 delta [Source:HGNC Symbol;Acc:HGNC:3211]	FALSE	TRUE	7.74749	5	30	5	High	High	High	High	Phospho [S534(95.6); S549(100); S578(100)]	106.98
High	ENSP00000251157.6	pep chromosome:GRCh38:1:62454726:62688264:-1 gene:ENSG00000116641.18 transcript:ENST00000251157.10 gene_biotype:protein_coding transcript_biotype:protein_coding gene_symbol:DOCK7 description:dedicator of cytokinesis 7 [Source:HGNC Symbol;Acc:HGNC:19190]	FALSE	TRUE	3.89489	6	26	6	High	High	High	High	Phospho [S182(98.1); S864(83.7); S900(93.4); T907(100); S910(99.5); S1383(100)]	59.61
High	ENSP00000364526.1	pep chromosome:GRCh38:10:30012803:30059586:-1 gene:ENSG00000165757.9 transcript:ENST00000375377.2 gene_biotype:protein_coding transcript_biotype:protein_coding gene_symbol:JCAD description:junctional cadherin 5 associated [Source:HGNC Symbol;Acc:HGNC:29283]	FALSE	TRUE	14.7903	14	26	14	High	High	High	High	Phospho [S67(100); S200(100); S255(100); S400(99.7); S757(97); S885(100); S1044(100); S1194(97); S1225(92.4); S1281(100); S1319(100); S1340(100)]	56.46
High	ENSP00000339740.5	pep chromosome:GRCh38:4:113454105:113761068:-1 gene:ENSG00000145349.17 transcript:ENST00000342666.9 gene_biotype:protein_coding transcript_biotype:protein_coding gene_symbol:CAMK2D description:calcium/calmodulin dependent protein kinase II delta [Source:HGNC Symbol;Acc:HGNC:1462]	FALSE	TRUE	7.61523	5	22	5	High	High	High	High	Phospho [T287(100); S315(100)]	59.32
High	ENSP00000398826.1	pep chromosome:GRCh38:7:134744252:134968402:1 gene:ENSG00000122786.20 transcript:ENST00000417172.5 gene_biotype:protein_coding transcript_biotype:protein_coding gene_symbol:CALD1 description:caldesmon 1 [Source:HGNC Symbol;Acc:HGNC:1441]	FALSE	TRUE	20.4461	12	21	4	High	High	High	High	Phospho [S202(100); S263(100)]	55.44
High	ENSP00000282633.5	pep chromosome:GRCh38:10:50067954:50133509:1 gene:ENSG00000099290.17 transcript:ENST00000282633.10 gene_biotype:protein_coding transcript_biotype:protein_coding gene_symbol:WASHC2A description:WASH complex subunit 2A [Source:HGNC Symbol;Acc:HGNC:23416]	FALSE	TRUE	11.484	11	19	2	High	High	High	High	Phospho [S158(100); S160(100); S238(100); S288(89.6); S333(95.9); S539(99.3); S728(100); S772(100)]	47.15
High	ENSP00000233813.4	pep chromosome:GRCh38:2:216672105:216695549:-1 gene:ENSG00000115461.5 transcript:ENST00000233813.5 gene_biotype:protein_coding transcript_biotype:protein_coding gene_symbol:IGFBP5 description:insulin like growth factor binding protein 5 [Source:HGNC Symbol;Acc:HGNC:5474]	FALSE	TRUE	8.82353	3	23	3	High	High	High	High	Phospho [S116(100); T124(84.2)]	34.47
High	ENSP00000271583.3	pep chromosome:GRCh38:1:179882297:179919277:1 gene:ENSG00000143337.18 transcript:ENST00000271583.7 gene_biotype:protein_coding transcript_biotype:protein_coding gene_symbol:TOR1AIP1 description:torsin 1A interacting protein 1 [Source:HGNC Symbol;Acc:HGNC:29456]	FALSE	TRUE	12.6878	6	22	6	High	High	High	High	Phospho [T221(88.8); S243(100); S331(99.3)]	58.56
High	ENSP00000262710.1	pep chromosome:GRCh38:14:23058567:23095614:-1 gene:ENSG00000100813.14 transcript:ENST00000262710.5 gene_biotype:protein_coding transcript_biotype:protein_coding gene_symbol:ACIN1 description:apoptotic chromatin condensation inducer 1 [Source:HGNC Symbol;Acc:HGNC:17066]	FALSE	TRUE	10.44	12	22	1	Medium	Medium	Medium	Medium	Phospho [S216(95.6); S240(99.2); S388(99.9); S490(100); S605(100); S710(89.9); S825(100); S838(100)]	47.17
High	ENSP00000242848.4	pep chromosome:GRCh38:13:45954465:46052746:-1 gene:ENSG00000123200.16 transcript:ENST00000242848.8 gene_biotype:protein_coding transcript_biotype:protein_coding gene_symbol:ZC3H13 description:zinc finger CCCH-type containing 13 [Source:HGNC Symbol;Acc:HGNC:20368]	FALSE	TRUE	8.63309	14	26	14	High	High	High	High	Phospho [S77(99.8); S110(99.8); S198(100); S316(85.1); S325(79.1); S642(92.1); S831(100); S848(100); S993(100); S1014(99.2); S1017(100); T1033(100); S1190(85.5)]	55.42
High	ENSP00000351022.3	pep chromosome:GRCh38:15:63042685:63071889:1 gene:ENSG00000140416.21 transcript:ENST00000358278.7 gene_biotype:protein_coding transcript_biotype:protein_coding gene_symbol:TPM1 description:tropomyosin 1 [Source:HGNC Symbol;Acc:HGNC:12010]	FALSE	TRUE	32.3944	13	16	3	High	High	High	High	Phospho [S87(100)]	39.85
High	ENSP00000386458.2	pep chromosome:GRCh38:2:152651593:152717981:-1 gene:ENSG00000196504.16 transcript:ENST00000410080.6 gene_biotype:protein_coding transcript_biotype:protein_coding gene_symbol:PRPF40A description:pre-mRNA processing factor 40 homolog A [Source:HGNC Symbol;Acc:HGNC:16463]	FALSE	TRUE	7.94769	10	19	10	High	High	High	High	Phospho [T410(83.3); S869(99.7); S871(99.7); S920(100); S922(100); S925(100); S975(100)]	40.56
High	ENSP00000355343.2	pep chromosome:GRCh38:1:154225082:154270853:1 gene:ENSG00000143569.19 transcript:ENST00000361546.6 gene_biotype:protein_coding transcript_biotype:protein_coding gene_symbol:UBAP2L description:ubiquitin associated protein 2 like [Source:HGNC Symbol;Acc:HGNC:29877]	FALSE	TRUE	7.91168	6	19	6	High	High	High	High	Phospho [S116(93.7); S416(100); S454(90.8); S467(100); S609(93.7)]	46.21
High	ENSP00000263277.2	pep chromosome:GRCh38:19:47713422:47743134:1 gene:ENSG00000024422.12 transcript:ENST00000263277.8 gene_biotype:protein_coding transcript_biotype:protein_coding gene_symbol:EHD2 description:EH domain containing 2 [Source:HGNC Symbol;Acc:HGNC:3243]	FALSE	TRUE	9.76059	4	29	4	High	High	High	High	Phospho [S438(100); S468(92.3)]	116.84
High	ENSP00000378400.3	pep chromosome:GRCh38:12:50175788:50283506:-1 gene:ENSG00000050405.13 transcript:ENST00000394943.7 gene_biotype:protein_coding transcript_biotype:protein_coding gene_symbol:LIMA1 description:LIM domain and actin binding 1 [Source:HGNC Symbol;Acc:HGNC:24636]	FALSE	TRUE	16.9737	8	23	8	High	High	High	High	Phospho [S343(100); S363(93.6); S370(94.5); S491(100); S610(100); S687(100); S699(100)]	55.93
High	ENSP00000336687.4	pep chromosome:GRCh38:7:26201162:26213356:1 gene:ENSG00000122565.19 transcript:ENST00000337620.8 gene_biotype:protein_coding transcript_biotype:protein_coding gene_symbol:CBX3 description:chromobox 3 [Source:HGNC Symbol;Acc:HGNC:1553]	FALSE	TRUE	13.6612	4	25	4	High	High	High	High	Phospho [S93(95.8); S176(100)]	68.29
High	ENSP00000489840.1	pep chromosome:GRCh38:12:120212314:120265629:-1 gene:ENSG00000089159.16 transcript:ENST00000637617.1 gene_biotype:protein_coding transcript_biotype:protein_coding gene_symbol:PXN description:paxillin [Source:HGNC Symbol;Acc:HGNC:9718]	FALSE	TRUE	11.2858	8	25	8	High	High	High	High	Phospho [S85(99.5); S106(99); S137(99.9); S258(99.9); S793(97.1)]	61.17
High	ENSP00000353590.3	pep chromosome:GRCh38:17:8474205:8630761:-1 gene:ENSG00000133026.12 transcript:ENST00000360416.7 gene_biotype:protein_coding transcript_biotype:protein_coding gene_symbol:MYH10 description:myosin heavy chain 10 [Source:HGNC Symbol;Acc:HGNC:7568]	FALSE	TRUE	5.43099	10	17	3	High	High	High	High	Phospho [S1987(100); S2006(100)]	49.23
High	ENSP00000337838.6	pep chromosome:GRCh38:2:54972189:55050451:-1 gene:ENSG00000115310.18 transcript:ENST00000337526.11 gene_biotype:protein_coding transcript_biotype:protein_coding gene_symbol:RTN4 description:reticulon 4 [Source:HGNC Symbol;Acc:HGNC:14085]	FALSE	TRUE	11.0738	7	22	2	High	High	High	High	Acetyl [N-Term]; Phospho [S15(93.4); S111(99.9)]	47.47
High	ENSP00000449328.1	pep chromosome:GRCh38:12:120196699:120201099:-1 gene:ENSG00000089157.16 transcript:ENST00000551150.5 gene_biotype:protein_coding transcript_biotype:protein_coding gene_symbol:RPLP0 description:ribosomal protein lateral stalk subunit P0 [Source:HGNC Symbol;Acc:HGNC:10371]	FALSE	TRUE	6.30915	2	34	2	High	High	High	High	Phospho [S307(100)]	101.2
High	ENSP00000380942.2	pep chromosome:GRCh38:11:120336413:120489937:1 gene:ENSG00000196914.9 transcript:ENST00000397843.7 gene_biotype:protein_coding transcript_biotype:protein_coding gene_symbol:ARHGEF12 description:Rho guanine nucleotide exchange factor 12 [Source:HGNC Symbol;Acc:HGNC:14193]	FALSE	TRUE	5.82902	5	14	5	High	High	High	High	Phospho [S41(100); S309(100); S341(99.9); T703(100); S1389(100)]	42.74
High	ENSP00000384026.2	pep chromosome:GRCh38:12:65824131:65966295:1 gene:ENSG00000149948.13 transcript:ENST00000403681.6 gene_biotype:protein_coding transcript_biotype:protein_coding gene_symbol:HMGA2 description:high mobility group AT-hook 2 [Source:HGNC Symbol;Acc:HGNC:5009]	FALSE	TRUE	29.3578	3	44	3	High	High	High	High	Phospho [S44(100); S101(100); S102(100)]	95.38
High	ENSP00000238256.3	pep chromosome:GRCh38:9:113161006:113221277:-1 gene:ENSG00000119321.9 transcript:ENST00000238256.8 gene_biotype:protein_coding transcript_biotype:protein_coding gene_symbol:FKBP15 description:FKBP prolyl isomerase 15 [Source:HGNC Symbol;Acc:HGNC:23397]	FALSE	TRUE	11.7309	6	26	6	High	High	High	High	Phospho [S956(98.6); S979(100); S1114(100); S1162(93.7)]	64.25
High	ENSP00000264331.4	pep chromosome:GRCh38:3:25597905:25664372:-1 gene:ENSG00000077097.15 transcript:ENST00000264331.8 gene_biotype:protein_coding transcript_biotype:protein_coding gene_symbol:TOP2B description:DNA topoisomerase II beta [Source:HGNC Symbol;Acc:HGNC:11990]	FALSE	TRUE	7.99508	7	16	7	High	High	High	High	Phospho [S1336(88.7); S1342(98.4); S1344(100); S1375(100); S1413(99.9); S1522(100); S1524(99.5); S1552(100); S1613]	41.69
High	ENSP00000264758.6	pep chromosome:GRCh38:4:2843857:2930073:1 gene:ENSG00000087274.17 transcript:ENST00000264758.11 gene_biotype:protein_coding transcript_biotype:protein_coding gene_symbol:ADD1 description:adducin 1 [Source:HGNC Symbol;Acc:HGNC:243]	FALSE	TRUE	13.5417	8	15	8	High	High	High	High	Phospho [T11(87); S358(99.7); T429(96.1); S431(99.9); S465(93.2); S617(100)]	39.16
High	ENSP00000311513.6	pep chromosome:GRCh38:11:77659996:77821017:-1 gene:ENSG00000048649.13 transcript:ENST00000308488.10 gene_biotype:protein_coding transcript_biotype:protein_coding gene_symbol:RSF1 description:remodeling and spacing factor 1 [Source:HGNC Symbol;Acc:HGNC:18118]	FALSE	TRUE	7.14781	8	13	8	High	High	High	High	Phospho [S604(100); S622(100); T1305(100); S1310(100); S1345(100)]	38.32
High	ENSP00000218364.4	pep chromosome:GRCh38:X:136497592:136512346:1 gene:ENSG00000102241.12 transcript:ENST00000218364.5 gene_biotype:protein_coding transcript_biotype:protein_coding gene_symbol:HTATSF1 description:HIV-1 Tat specific factor 1 [Source:HGNC Symbol;Acc:HGNC:5276]	FALSE	TRUE	23.1788	15	20	15	High	High	High	High	Phospho [S387(90.6); S453(85.3); S498(99.9); S529(100); S579(100); S597(100); S600(100); S607(100); S616(100); S624(100); S642(100); S676(100); S702(100); S721(100)]	38.04
High	ENSP00000389168.2	pep chromosome:GRCh38:12:79773568:79935097:-1 gene:ENSG00000058272.19 transcript:ENST00000450142.7 gene_biotype:protein_coding transcript_biotype:protein_coding gene_symbol:PPP1R12A description:protein phosphatase 1 regulatory subunit 12A [Source:HGNC Symbol;Acc:HGNC:7618]	FALSE	TRUE	8.54369	6	15	6	High	High	High	High	Phospho [S299(100); S668(97.7); S871(100); Y911(82)]	45.26
High	ENSP00000267812.3	pep chromosome:GRCh38:15:43804492:43824690:-1 gene:ENSG00000140259.7 transcript:ENST00000267812.4 gene_biotype:protein_coding transcript_biotype:protein_coding gene_symbol:MFAP1 description:microfibril associated protein 1 [Source:HGNC Symbol;Acc:HGNC:7032]	FALSE	TRUE	19.3622	4	12	4	High	High	High	High	Phospho [S52(100); S53(100); S116(100); S118(100); S132(100); S133(100); T267(100)]	57.61
High	ENSP00000365745.3	pep chromosome:GRCh38:11:70398541:70436579:1 gene:ENSG00000085733.16 transcript:ENST00000376561.7 gene_biotype:protein_coding transcript_biotype:protein_coding gene_symbol:CTTN description:cortactin [Source:HGNC Symbol;Acc:HGNC:3338]	FALSE	TRUE	8.20189	4	34	4	High	High	High	High	Phospho [S343(100); S343(100); Y349(100); Y349(100); T364(100); S381(89.8)]	87.73
High	ENSP00000316029.9	pep chromosome:GRCh38:9:35696948:35732195:-1 gene:ENSG00000137076.21 transcript:ENST00000314888.10 gene_biotype:protein_coding transcript_biotype:protein_coding gene_symbol:TLN1 description:talin 1 [Source:HGNC Symbol;Acc:HGNC:11845]	FALSE	TRUE	5.15545	10	16	10	High	High	High	High	Phospho [S729(94.4); S979(99.3); S1164(99.7); S1227(99.9); T1263(100); S1641(100); S2040(100); S2162(100)]	36.09
High	ENSP00000421633.1	pep chromosome:GRCh38:4:82818672:82881937:-1 gene:ENSG00000138674.17 transcript:ENST00000505472.5 gene_biotype:protein_coding transcript_biotype:protein_coding gene_symbol:SEC31A description:SEC31 homolog A, COPII coat complex component [Source:HGNC Symbol;Acc:HGNC:17052]	FALSE	TRUE	5.11591	5	12	5	High	High	High	High	Phospho [S527(100); S799(100); S1194(95.8)]	55.12
High	ENSP00000234038.6	pep chromosome:GRCh38:2:241150467:241183652:1 gene:ENSG00000115685.15 transcript:ENST00000234038.11 gene_biotype:protein_coding transcript_biotype:protein_coding gene_symbol:PPP1R7 description:protein phosphatase 1 regulatory subunit 7 [Source:HGNC Symbol;Acc:HGNC:9295]	FALSE	TRUE	8.05556	5	24	5	High	High	High	High	Phospho [S12(100); S27(100)]	21.12
High	ENSP00000378917.2	pep chromosome:GRCh38:16:28823093:28837237:1 gene:ENSG00000168488.18 transcript:ENST00000395547.6 gene_biotype:protein_coding transcript_biotype:protein_coding gene_symbol:ATXN2L description:ataxin 2 like [Source:HGNC Symbol;Acc:HGNC:31326]	FALSE	TRUE	7.01914	7	25	7	High	High	High	High	Phospho [S111(100); S339(90.4); S594(100); S684(92.5)]	45.9
High	ENSP00000471367.1	pep chromosome:GRCh38:19:17075786:17213284:1 gene:ENSG00000099331.13 transcript:ENST00000594824.5 gene_biotype:protein_coding transcript_biotype:protein_coding gene_symbol:MYO9B description:myosin IXB [Source:HGNC Symbol;Acc:HGNC:7609]	FALSE	TRUE	5.4242	8	18	8	High	High	High	High	Phospho [S1115(91.5); T1271(100); S1290(100); T1346(100); S1354(93.4); S1405(100); S1992(100)]	37
High	ENSP00000325240.6	pep chromosome:GRCh38:17:38870058:38921770:1 gene:ENSG00000002834.18 transcript:ENST00000318008.11 gene_biotype:protein_coding transcript_biotype:protein_coding gene_symbol:LASP1 description:LIM and SH3 protein 1 [Source:HGNC Symbol;Acc:HGNC:6513]	FALSE	TRUE	20.3065	6	35	6	High	High	High	High	Phospho [S146(99.6)]	44.77
High	ENSP00000225388.3	pep chromosome:GRCh38:17:29255839:29294148:-1 gene:ENSG00000108256.9 transcript:ENST00000225388.9 gene_biotype:protein_coding transcript_biotype:protein_coding gene_symbol:NUFIP2 description:nuclear FMR1 interacting protein 2 [Source:HGNC Symbol;Acc:HGNC:17634]	FALSE	TRUE	16.6906	7	14	7	High	High	High	High	Phospho [S112(93.7); S212(100); T378(90.2); S572(95.1); S629(99.6); S652(100); S692(100)]	36.79
High	ENSP00000425556.1	pep chromosome:GRCh38:4:168497052:168928441:1 gene:ENSG00000129116.19 transcript:ENST00000505667.6 gene_biotype:protein_coding transcript_biotype:protein_coding gene_symbol:PALLD description:palladin, cytoskeletal associated protein [Source:HGNC Symbol;Acc:HGNC:17068]	FALSE	TRUE	4.63045	7	33	7	High	High	High	High	Phospho [S669(100); S897(100); S909(91.2); S914(100)]	75.39
High	ENSP00000373696.4	pep chromosome:GRCh38:2:229767441:229921999:-1 gene:ENSG00000153827.13 transcript:ENST00000389044.8 gene_biotype:protein_coding transcript_biotype:protein_coding gene_symbol:TRIP12 description:thyroid hormone receptor interactor 12 [Source:HGNC Symbol;Acc:HGNC:12306]	FALSE	TRUE	7.20588	12	22	12	High	High	High	High	Phospho [S45(93.6); S119(86.8); S203(99.2); S205(92.5); S354(100); S1035(100); S1084(100); S1365(100); S1370(100); S1424(99.8); T1425(99.8)]	41.83
High	ENSP00000469820.1	pep chromosome:GRCh38:11:118607615:118658028:1 gene:ENSG00000019144.19 transcript:ENST00000600882.6 gene_biotype:protein_coding transcript_biotype:protein_coding gene_symbol:PHLDB1 description:pleckstrin homology like domain family B member 1 [Source:HGNC Symbol;Acc:HGNC:23697]	FALSE	TRUE	9.07771	10	20	10	High	High	High	High	Phospho [S324(100); S430(99.9); S489(100); S539(100); S578(82.3); S971(99.6)]	38.03
High	ENSP00000339035.7	pep chromosome:GRCh38:1:154156364:154183205:-1 gene:ENSG00000143549.21 transcript:ENST00000330188.13 gene_biotype:protein_coding transcript_biotype:protein_coding gene_symbol:TPM3 description:tropomyosin 3 [Source:HGNC Symbol;Acc:HGNC:12012]	FALSE	TRUE	32.2581	11	14	1	High	High	High	High	Phospho [S51(100)]	35.98
High	ENSP00000356716.3	pep chromosome:GRCh38:1:171485551:171593511:1 gene:ENSG00000117523.16 transcript:ENST00000367742.7 gene_biotype:protein_coding transcript_biotype:protein_coding gene_symbol:PRRC2C description:proline rich coiled-coil 2C [Source:HGNC Symbol;Acc:HGNC:24903]	FALSE	TRUE	4.78893	11	26	11	High	High	High	High	Phospho [S189(100); S635(100); S638(100); S931(79.1); S1244(94.8); S2107(100); T2675(100); S2696(90)]	55.36
High	ENSP00000271850.7	pep chromosome:GRCh38:1:154157318:154192058:-1 gene:ENSG00000143549.21 transcript:ENST00000271850.11 gene_biotype:protein_coding transcript_biotype:protein_coding gene_symbol:TPM3 description:tropomyosin 3 [Source:HGNC Symbol;Acc:HGNC:12012]	FALSE	TRUE	28.4211	11	14	1	High	High	High	High	Phospho [S88(100)]	36
High	ENSP00000254950.11	pep chromosome:GRCh38:16:69311350:69326939:1 gene:ENSG00000132612.16 transcript:ENST00000254950.13 gene_biotype:protein_coding transcript_biotype:protein_coding gene_symbol:VPS4A description:vacuolar protein sorting 4 homolog A [Source:HGNC Symbol;Acc:HGNC:13488]	FALSE	TRUE	4.80549	4	16	4	High	High	High	High	Phospho [S97(99.6)]	46.22
High	ENSP00000395710.1	pep chromosome:GRCh38:7:134779420:134968859:1 gene:ENSG00000122786.20 transcript:ENST00000422748.5 gene_biotype:protein_coding transcript_biotype:protein_coding gene_symbol:CALD1 description:caldesmon 1 [Source:HGNC Symbol;Acc:HGNC:1441]	FALSE	TRUE	19.3606	10	16	2	High	High	High	High	Phospho [S202(100); S289(100)]	53.08
High	ENSP00000414373.2	pep chromosome:GRCh38:CHR_HSCHR6_MHC_MANN_CTG1:30616012:30636067:1 gene:ENSG00000231129.8 transcript:ENST00000426219.6 gene_biotype:protein_coding transcript_biotype:protein_coding gene_symbol:ABCF1 description:ATP binding cassette subfamily F member 1 [Source:HGNC Symbol;Acc:HGNC:70]	FALSE	TRUE	7.33728	5	17	5	High	High	High	High	Phospho [S22(99.2); S109(99.9); S228(100)]	62.77
High	ENSP00000489993.1	pep chromosome:GRCh38:CHR_HSCHR2_6_CTG7_2:206159585:206162928:1 gene:ENSG00000283391.2 transcript:ENST00000635728.1 gene_biotype:protein_coding transcript_biotype:protein_coding gene_symbol:EEF1B2 description:eukaryotic translation elongation factor 1 beta 2 [Source:HGNC Symbol;Acc:HGNC:3208]	FALSE	TRUE	24	5	27	5	High	High	High	High	Phospho [S106(100)]	104.88
High	ENSP00000379616.3	pep chromosome:GRCh38:16:15703172:15857011:-1 gene:ENSG00000133392.18 transcript:ENST00000396324.7 gene_biotype:protein_coding transcript_biotype:protein_coding gene_symbol:MYH11 description:myosin heavy chain 11 [Source:HGNC Symbol;Acc:HGNC:7569]	FALSE	TRUE	4.34563	7	11	1	High	High	High	High	Phospho [S1961(100)]	38.63
High	ENSP00000322147.7	pep chromosome:GRCh38:2:54972189:55050544:-1 gene:ENSG00000115310.18 transcript:ENST00000317610.11 gene_biotype:protein_coding transcript_biotype:protein_coding gene_symbol:RTN4 description:reticulon 4 [Source:HGNC Symbol;Acc:HGNC:14085]	FALSE	TRUE	33.244	7	16	2	High	High	High	High	Acetyl [N-Term]; Phospho [S15(93.4); S111(99.9); S181(90.3)]	44.5
High	ENSP00000496269.1	pep chromosome:GRCh38:2:121337776:121606060:-1 gene:ENSG00000074054.18 transcript:ENST00000646274.1 gene_biotype:protein_coding transcript_biotype:protein_coding gene_symbol:CLASP1 description:cytoplasmic linker associated protein 1 [Source:HGNC Symbol;Acc:HGNC:17088]	FALSE	TRUE	6.24187	9	23	1	High	High	High	High	Phospho [S572(99.9); S594(81.8); S600(99.9); S647(93.7); S649(99.5); S723(100); S727(100); S731(99.4); T798(98.6); S1091(92.8)]	36.99
High	ENSP00000441625.1	pep chromosome:GRCh38:2:121337776:121649476:-1 gene:ENSG00000074054.18 transcript:ENST00000541377.5 gene_biotype:protein_coding transcript_biotype:protein_coding gene_symbol:CLASP1 description:cytoplasmic linker associated protein 1 [Source:HGNC Symbol;Acc:HGNC:17088]	FALSE	TRUE	6.02573	9	24	1	High	High	High	High	Phospho [S572(99.9); S594(81.8); S600(99.9); S663(93.7); S665(99.5); S691(99.6); S730(100); S734(100); S738(99.4); S1069(92.8)]	40.83
High	ENSP00000238497.4	pep chromosome:GRCh38:18:63389190:63422476:-1 gene:ENSG00000119541.10 transcript:ENST00000238497.10 gene_biotype:protein_coding transcript_biotype:protein_coding gene_symbol:VPS4B description:vacuolar protein sorting 4 homolog B [Source:HGNC Symbol;Acc:HGNC:10895]	FALSE	TRUE	5.85586	4	14	4	High	High	High	High	Phospho [S102(100)]	53.19
High	ENSP00000322938.3	pep chromosome:GRCh38:8:143790920:143815379:-1 gene:ENSG00000180900.19 transcript:ENST00000320476.7 gene_biotype:protein_coding transcript_biotype:protein_coding gene_symbol:SCRIB description:scribble planar cell polarity protein [Source:HGNC Symbol;Acc:HGNC:30377]	FALSE	TRUE	9.6319	9	17	9	High	High	High	High	Phospho [S504(100); S835(88.1); S1220(100); S1439(84.5); S1448(99.8); S1475(100); T1549(75.6)]	43.17
High	ENSP00000354730.1	pep chromosome:GRCh38:13:114314503:114327322:1 gene:ENSG00000198824.7 transcript:ENST00000361283.4 gene_biotype:protein_coding transcript_biotype:protein_coding gene_symbol:CHAMP1 description:chromosome alignment maintaining phosphoprotein 1 [Source:HGNC Symbol;Acc:HGNC:20311]	FALSE	TRUE	19.9507	12	23	12	High	High	High	High	Phospho [S108(88.1); S204(100); S275(93.1); S286(98.1); S416(100); S427(100); S445(100); S476(100); S542(100); S652(94.7); S653(94.7)]	42.67
High	ENSP00000328848.8	pep chromosome:GRCh38:X:47145447:47186812:1 gene:ENSG00000182872.16 transcript:ENST00000329236.8 gene_biotype:protein_coding transcript_biotype:protein_coding gene_symbol:RBM10 description:RNA binding motif protein 10 [Source:HGNC Symbol;Acc:HGNC:9896]	FALSE	TRUE	7.33668	5	17	5	High	High	High	High	Phospho [S125(97.7); S126(97.7); S130(99.6); T156(89.8); S788(100); S803(100)]	42.84
High	ENSP00000304669.7	pep chromosome:GRCh38:5:138753425:138935034:1 gene:ENSG00000044115.21 transcript:ENST00000302763.12 gene_biotype:protein_coding transcript_biotype:protein_coding gene_symbol:CTNNA1 description:catenin alpha 1 [Source:HGNC Symbol;Acc:HGNC:2509]	FALSE	TRUE	4.08389	4	17	4	High	High	High	High	Phospho [S641(100); T658(100)]	53.5
High	ENSP00000358081.3	pep chromosome:GRCh38:10:119651370:119677819:1 gene:ENSG00000151929.9 transcript:ENST00000369085.7 gene_biotype:protein_coding transcript_biotype:protein_coding gene_symbol:BAG3 description:BCL2 associated athanogene 3 [Source:HGNC Symbol;Acc:HGNC:939]	FALSE	TRUE	16.6957	5	20	5	High	High	High	High	Phospho [S173(100); S275(98.7); S279(100); S289(100); S381(96.3); T406(100)]	33.82
High	ENSP00000493815.1	pep chromosome:GRCh38:5:150357704:150400293:1 gene:ENSG00000070814.20 transcript:ENST00000643257.1 gene_biotype:protein_coding transcript_biotype:protein_coding gene_symbol:TCOF1 description:treacle ribosome biogenesis factor 1 [Source:HGNC Symbol;Acc:HGNC:11654]	FALSE	TRUE	10.544	10	20	10	High	High	High	High	Phospho [S381(100); S1153(88.8); S1228(85.2); S1258(100); S1351(100); S1379(100); S1472(99.8)]	34.53
High	ENSP00000305027.11	pep chromosome:GRCh38:18:8705661:8828946:1 gene:ENSG00000168502.17 transcript:ENST00000306329.15 gene_biotype:protein_coding transcript_biotype:protein_coding gene_symbol:MTCL1 description:microtubule crosslinking factor 1 [Source:HGNC Symbol;Acc:HGNC:29121]	FALSE	TRUE	6.56168	9	17	9	High	High	High	High	Phospho [S306(100); S622(99.3); S741(100); S745(100); S749(100); S776(100); T1417(100); S1421(100); S1514(100); S1808(83.2); S1812(100); S1814(100)]	41.99
High	ENSP00000264555.5	pep chromosome:GRCh38:11:576470:612222:1 gene:ENSG00000070047.12 transcript:ENST00000264555.10 gene_biotype:protein_coding transcript_biotype:protein_coding gene_symbol:PHRF1 description:PHD and ring finger domains 1 [Source:HGNC Symbol;Acc:HGNC:24351]	FALSE	TRUE	7.88357	8	12	8	High	High	High	High	Phospho [S915(99); S936(100); S973(100); S1202(100); S1229(100)]	29.01
High	ENSP00000318884.9	pep chromosome:GRCh38:1:240091883:240475187:1 gene:ENSG00000155816.20 transcript:ENST00000319653.14 gene_biotype:protein_coding transcript_biotype:protein_coding gene_symbol:FMN2 description:formin 2 [Source:HGNC Symbol;Acc:HGNC:14074]	FALSE	TRUE	9.29152	7	13	7	High	High	High	High	Phospho [S295(100); T345(100); S361(100); S396(100); S400(99.4); S436(99.3); S440(100); S482(99.9)]	45.98
High	ENSP00000264485.5	pep chromosome:GRCh38:4:71187259:71572083:1 gene:ENSG00000080493.17 transcript:ENST00000264485.11 gene_biotype:protein_coding transcript_biotype:protein_coding gene_symbol:SLC4A4 description:solute carrier family 4 member 4 [Source:HGNC Symbol;Acc:HGNC:11030]	FALSE	TRUE	3.98517	4	10	4	High	High	High	High	Phospho [S1029(100); S1034(100); S1069(98.8)]	37.56
High	ENSP00000217971.7	pep chromosome:GRCh38:X:119236285:119244466:1 gene:ENSG00000101856.10 transcript:ENST00000217971.8 gene_biotype:protein_coding transcript_biotype:protein_coding gene_symbol:PGRMC1 description:progesterone receptor membrane component 1 [Source:HGNC Symbol;Acc:HGNC:16090]	FALSE	TRUE	20.5128	3	17	3	High	High	High	High	Phospho [S57(93.3); S181(99.2)]	43.13
High	ENSP00000337541.5	pep chromosome:GRCh38:10:45727236:45792961:1 gene:ENSG00000172661.18 transcript:ENST00000336378.8 gene_biotype:protein_coding transcript_biotype:protein_coding gene_symbol:WASHC2C description:WASH complex subunit 2C [Source:HGNC Symbol;Acc:HGNC:23414]	FALSE	TRUE	9.69426	10	17	1	Medium	Medium	Medium	Medium	Phospho [T6(79.8); S158(100); S160(100); S288(89.6); S333(95.9); S728(100); S772(100)]	32.77
High	ENSP00000482026.1	pep chromosome:GRCh38:1:71065719:71081289:-1 gene:ENSG00000132485.14 transcript:ENST00000611683.1 gene_biotype:protein_coding transcript_biotype:protein_coding gene_symbol:ZRANB2 description:zinc finger RANBP2-type containing 2 [Source:HGNC Symbol;Acc:HGNC:13058]	FALSE	TRUE	23.75	7	18	2	High	High	High	High	Phospho [S120(100); S153(100); S188(100); T303(100); S305(100); S307(99.7)]	40.22
High	ENSP00000370114.4	pep chromosome:GRCh38:9:15464066:15510995:-1 gene:ENSG00000164985.15 transcript:ENST00000380738.8 gene_biotype:protein_coding transcript_biotype:protein_coding gene_symbol:PSIP1 description:PC4 and SFRS1 interacting protein 1 [Source:HGNC Symbol;Acc:HGNC:9527]	FALSE	TRUE	9.0566	4	10	4	High	High	High	High	Phospho [S106(95.7); T122(100); S273(93.5); S275(99.5)]	32.1
High	ENSP00000312143.9	pep chromosome:GRCh38:7:47275154:47582111:-1 gene:ENSG00000136205.17 transcript:ENST00000311160.14 gene_biotype:protein_coding transcript_biotype:protein_coding gene_symbol:TNS3 description:tensin 3 [Source:HGNC Symbol;Acc:HGNC:21616]	FALSE	TRUE	8.71972	8	23	8	High	High	High	High	Phospho [Y333(90.4); S660(89.7); S776(100); S811(100); S850(100); S944(99.2); S1149(100)]	31.88
High	ENSP00000354826.2	pep chromosome:GRCh38:7:134779634:134970729:1 gene:ENSG00000122786.20 transcript:ENST00000361675.7 gene_biotype:protein_coding transcript_biotype:protein_coding gene_symbol:CALD1 description:caldesmon 1 [Source:HGNC Symbol;Acc:HGNC:1441]	FALSE	TRUE	14.2497	9	13	1	High	High	High	High	Phospho [S202(100); S518(100)]	43.09
High	ENSP00000325941.5	pep chromosome:GRCh38:11:208530:215113:1 gene:ENSG00000177963.14 transcript:ENST00000325207.9 gene_biotype:protein_coding transcript_biotype:protein_coding gene_symbol:RIC8A description:RIC8 guanine nucleotide exchange factor A [Source:HGNC Symbol;Acc:HGNC:29550]	FALSE	TRUE	8.56611	3	21	3	High	High	High	High	Phospho [S442(99)]	41.75
High	ENSP00000340900.5	pep chromosome:GRCh38:1:222618097:222668007:1 gene:ENSG00000154305.18 transcript:ENST00000344922.10 gene_biotype:protein_coding transcript_biotype:protein_coding gene_symbol:MIA3 description:MIA SH3 domain ER export factor 3 [Source:HGNC Symbol;Acc:HGNC:24008]	FALSE	TRUE	5.08652	5	19	5	High	High	High	High	Phospho [S406(89.4); S727(99.4); S876(100); S1906(100)]	34.58
High	ENSP00000485276.1	pep chromosome:GRCh38:22:20424815:20437826:-1 gene:ENSG00000244486.8 transcript:ENST00000623402.1 gene_biotype:protein_coding transcript_biotype:protein_coding gene_symbol:SCARF2 description:scavenger receptor class F member 2 [Source:HGNC Symbol;Acc:HGNC:19869]	FALSE	TRUE	8.03674	5	20	5	High	High	High	High	Phospho [S551(100); S553(88.4); S653(100); S687(100); S718(100)]	49.15
High	ENSP00000353769.2	pep chromosome:GRCh38:19:49642209:49658642:1 gene:ENSG00000126461.15 transcript:ENST00000360565.8 gene_biotype:protein_coding transcript_biotype:protein_coding gene_symbol:SCAF1 description:SR-related CTD associated factor 1 [Source:HGNC Symbol;Acc:HGNC:30403]	FALSE	TRUE	6.40244	8	14	8	High	High	High	High	Phospho [S239(99.9); S612(98.9); S614(82); S719(99.2); S725(91.7); S734(100); S738(100); S965(82.2); T976(93.6)]	29.83
High	ENSP00000382633.1	pep chromosome:GRCh38:1:25900118:25906153:-1 gene:ENSG00000117632.23 transcript:ENST00000399728.5 gene_biotype:protein_coding transcript_biotype:protein_coding gene_symbol:STMN1 description:stathmin 1 [Source:HGNC Symbol;Acc:HGNC:6510]	FALSE	TRUE	38.255	8	14	8	High	High	High	High	Phospho [S16(100); S38(100); S46(100); S63(100)]	34.07
High	ENSP00000428378.1	pep chromosome:GRCh38:5:150617644:150652334:1 gene:ENSG00000171992.13 transcript:ENST00000522122.1 gene_biotype:protein_coding transcript_biotype:protein_coding gene_symbol:SYNPO description:synaptopodin [Source:HGNC Symbol;Acc:HGNC:30672]	FALSE	TRUE	15.1776	9	16	1	High	High	High	High	Phospho [S232(100); S235(100); S263(100); T461(99.6); S525(85.1); S536(100); S685(100); Y885(83.1)]	49.48
High	ENSP00000263674.3	pep chromosome:GRCh38:11:73308276:73369388:1 gene:ENSG00000110237.5 transcript:ENST00000263674.4 gene_biotype:protein_coding transcript_biotype:protein_coding gene_symbol:ARHGEF17 description:Rho guanine nucleotide exchange factor 17 [Source:HGNC Symbol;Acc:HGNC:21726]	FALSE	TRUE	7.12555	8	13	8	High	High	High	High	Phospho [S142(92.6); T170(100); S420(100); S509(77.9); S619(100); S764(100)]	24.39
High	ENSP00000482066.1	pep chromosome:GRCh38:5:17216823:17276843:1 gene:ENSG00000176788.9 transcript:ENST00000616743.1 gene_biotype:protein_coding transcript_biotype:protein_coding gene_symbol:BASP1 description:brain abundant membrane attached signal protein 1 [Source:HGNC Symbol;Acc:HGNC:957]	FALSE	TRUE	27.7533	6	14	6	High	High	High	High	Phospho [T36(100); S176(86.1); T196(94.6)]	24.91
High	ENSP00000378500.1	pep chromosome:GRCh38:7:74317547:74403848:1 gene:ENSG00000106665.15 transcript:ENST00000395060.5 gene_biotype:protein_coding transcript_biotype:protein_coding gene_symbol:CLIP2 description:CAP-Gly domain containing linker protein 2 [Source:HGNC Symbol;Acc:HGNC:2586]	FALSE	TRUE	2.86807	3	10	2	High	High	High	High	Phospho [S202(98.5); S211(98.7); S352(100)]	31.66
High	ENSP00000228251.4	pep chromosome:GRCh38:12:10699089:10723323:-1 gene:ENSG00000060138.13 transcript:ENST00000228251.9 gene_biotype:protein_coding transcript_biotype:protein_coding gene_symbol:YBX3 description:Y-box binding protein 3 [Source:HGNC Symbol;Acc:HGNC:2428]	FALSE	TRUE	25.2688	3	14	3	High	High	High	High	Phospho [S34(81.2); S203(97.6)]	40.67
High	ENSP00000433547.1	pep chromosome:GRCh38:6:4021267:4064982:1 gene:ENSG00000112739.17 transcript:ENST00000480058.5 gene_biotype:protein_coding transcript_biotype:nonsense_mediated_decay gene_symbol:PRPF4B description:pre-mRNA processing factor 4B [Source:HGNC Symbol;Acc:HGNC:17346]	FALSE	TRUE	12.6117	11	13	10	High	High	High	High	Phospho [S20(100); S257(95.2); S277(100); S366(100); S368(100); S410(100); S411(100); S431(100); S518; S519; S580(100); Y849(99.9); S921(100); S921(100); S923(100); S923(100)]	25.35
High	ENSP00000492983.1	pep chromosome:GRCh38:19:3314403:3469217:1 gene:ENSG00000141905.19 transcript:ENST00000641145.1 gene_biotype:protein_coding transcript_biotype:protein_coding gene_symbol:NFIC description:nuclear factor I C [Source:HGNC Symbol;Acc:HGNC:7786]	FALSE	TRUE	13.7736	6	15	6	High	High	High	High	Phospho [S216(95.2); S327(91.3); S345(99.5); S361(99.2)]	37.54
High	ENSP00000483345.1	pep chromosome:GRCh38:19:4472297:4502207:1 gene:ENSG00000167674.15 transcript:ENST00000616600.5 gene_biotype:protein_coding transcript_biotype:protein_coding gene_symbol:HDGFL2 description:HDGF like 2 [Source:HGNC Symbol;Acc:HGNC:14680]	FALSE	TRUE	11.1773	6	14	6	High	High	High	High	Phospho [S366(100); S369(100); S370(100); S454(100); S625(100); S633(99.1); S664(100)]	27.35
High	ENSP00000376410.4	pep chromosome:GRCh38:14:104689618:104722535:1 gene:ENSG00000203485.13 transcript:ENST00000392634.9 gene_biotype:protein_coding transcript_biotype:protein_coding gene_symbol:INF2 description:inverted formin, FH2 and WH2 domain containing [Source:HGNC Symbol;Acc:HGNC:23791]	FALSE	TRUE	11.4492	5	12	5	High	High	High	High	Phospho [T420(79.2); S589(97.9); S1149(77.9); T1179(100); S1188(87.3)]	19.75
High	ENSP00000429824.1	pep chromosome:GRCh38:5:157787405:157859143:-1 gene:ENSG00000113282.13 transcript:ENST00000523908.5 gene_biotype:protein_coding transcript_biotype:protein_coding gene_symbol:CLINT1 description:clathrin interactor 1 [Source:HGNC Symbol;Acc:HGNC:23186]	FALSE	TRUE	7.46501	6	18	6	High	High	High	High	Phospho [S227(100); S232(100); S234(100)]	40.6
High	ENSP00000282120.3	pep chromosome:GRCh38:2:85318020:85328296:-1 gene:ENSG00000152291.14 transcript:ENST00000282120.6 gene_biotype:protein_coding transcript_biotype:protein_coding gene_symbol:TGOLN2 description:trans-golgi network protein 2 [Source:HGNC Symbol;Acc:HGNC:15450]	FALSE	TRUE	16.2839	6	19	6	High	High	High	High	Phospho [S71(93.1); S154(100); S298(90); S349(94.7)]	29.86
High	ENSP00000359000.3	pep chromosome:GRCh38:10:102245532:102382899:1 gene:ENSG00000107862.4 transcript:ENST00000369983.3 gene_biotype:protein_coding transcript_biotype:protein_coding gene_symbol:GBF1 description:golgi brefeldin A resistant guanine nucleotide exchange factor 1 [Source:HGNC Symbol;Acc:HGNC:4181]	FALSE	TRUE	4.08822	4	15	4	High	High	High	High	Phospho [S662(99.3); S1298(100)]	40.44
High	ENSP00000310309.7	pep chromosome:GRCh38:5:149141503:149260439:1 gene:ENSG00000173210.19 transcript:ENST00000309868.11 gene_biotype:protein_coding transcript_biotype:protein_coding gene_symbol:ABLIM3 description:actin binding LIM protein family member 3 [Source:HGNC Symbol;Acc:HGNC:29132]	FALSE	TRUE	6.73499	4	12	4	High	High	High	High	Phospho [S286(86.9); S373(100); S503(100); S504(100)]	34.1
High	ENSP00000268712.2	pep chromosome:GRCh38:17:16029157:16215534:-1 gene:ENSG00000141027.21 transcript:ENST00000268712.8 gene_biotype:protein_coding transcript_biotype:protein_coding gene_symbol:NCOR1 description:nuclear receptor corepressor 1 [Source:HGNC Symbol;Acc:HGNC:7672]	FALSE	TRUE	5.2459	7	12	7	High	High	High	High	Phospho [S224(100); S992(99.4); S1472(99.8); S1977(100); S1981(99.4); S2184(99.9); S2436(93.2)]	26.32
High	ENSP00000479068.1	pep chromosome:GRCh38:8:8317736:8381747:-1 gene:ENSG00000275342.5 transcript:ENST00000622241.1 gene_biotype:protein_coding transcript_biotype:protein_coding gene_symbol:PRAG1 description:PEAK1 related, kinase-activating pseudokinase 1 [Source:HGNC Symbol;Acc:HGNC:25438]	FALSE	TRUE	10.5263	8	13	8	High	High	High	High	Phospho [S234(100); S248(97.2); S263(100); Y413(100); S510(99.6); S729(85.3); S782(99.9); T801(98.2)]	26.76
High	ENSP00000262013.7	pep chromosome:GRCh38:17:50962174:51120868:-1 gene:ENSG00000008294.21 transcript:ENST00000262013.12 gene_biotype:protein_coding transcript_biotype:protein_coding gene_symbol:SPAG9 description:sperm associated antigen 9 [Source:HGNC Symbol;Acc:HGNC:14524]	FALSE	TRUE	8.93263	7	14	7	High	High	High	High	Phospho [T217(100); T226(100); S251(100); S265(100); S268(100); T276(88); S332(100); S733(93.8)]	33.32
High	ENSP00000296930.5	pep chromosome:GRCh38:5:171387648:171411137:1 gene:ENSG00000181163.13 transcript:ENST00000296930.9 gene_biotype:protein_coding transcript_biotype:protein_coding gene_symbol:NPM1 description:nucleophosmin 1 [Source:HGNC Symbol;Acc:HGNC:7910]	FALSE	TRUE	32.3129	6	25	6	High	High	High	High	Phospho [S70(100); S125(100); S254(100)]	98.32
High	ENSP00000358563.5	pep chromosome:GRCh38:X:154762864:154777689:1 gene:ENSG00000130826.18 transcript:ENST00000369550.10 gene_biotype:protein_coding transcript_biotype:protein_coding gene_symbol:DKC1 description:dyskerin pseudouridine synthase 1 [Source:HGNC Symbol;Acc:HGNC:2890]	FALSE	TRUE	8.94942	5	19	5	High	High	High	High	Phospho [S451(93.8); S494(100); S513(100)]	48.08
High	ENSP00000420213.1	pep chromosome:GRCh38:3:58008400:58170774:1 gene:ENSG00000136068.14 transcript:ENST00000490882.5 gene_biotype:protein_coding transcript_biotype:protein_coding gene_symbol:FLNB description:filamin B [Source:HGNC Symbol;Acc:HGNC:3755]	FALSE	TRUE	3.72199	9	11	2	High	High	High	High	Phospho [S2138(99.8); S2512(94.4)]	26.06
High	ENSP00000227520.5	pep chromosome:GRCh38:11:60842113:60851081:1 gene:ENSG00000110104.13 transcript:ENST00000227520.10 gene_biotype:protein_coding transcript_biotype:protein_coding gene_symbol:CCDC86 description:coiled-coil domain containing 86 [Source:HGNC Symbol;Acc:HGNC:28359]	FALSE	TRUE	28.3333	7	13	7	High	High	High	High	Phospho [S18(100); S47(86.9); S58(100); S69(100); S80(100); S91(100); S102(100); S113(100)]	35.67
High	ENSP00000325313.3	pep chromosome:GRCh38:19:17719480:17734513:1 gene:ENSG00000130479.11 transcript:ENST00000324096.9 gene_biotype:protein_coding transcript_biotype:protein_coding gene_symbol:MAP1S description:microtubule associated protein 1S [Source:HGNC Symbol;Acc:HGNC:15715]	FALSE	TRUE	11.1426	8	14	8	High	High	High	High	Phospho [S321(100); S472(99); S475(91.2); S595(88.4); T638(100); S640(99.8); S646(89.9); S731(93.8); S759(99.9)]	32.69
High	ENSP00000370125.5	pep chromosome:GRCh38:21:39342315:39349088:-1 gene:ENSG00000205581.11 transcript:ENST00000380749.10 gene_biotype:protein_coding transcript_biotype:protein_coding gene_symbol:HMGN1 description:high mobility group nucleosome binding domain 1 [Source:HGNC Symbol;Acc:HGNC:4984]	FALSE	TRUE	28	4	15	4	High	High	High	High	Phospho [S7(91.1); S86(100); S89(100); S99(100)]	34.54
High	ENSP00000416959.2	pep chromosome:GRCh38:3:185914558:185938014:-1 gene:ENSG00000136527.18 transcript:ENST00000453386.7 gene_biotype:protein_coding transcript_biotype:protein_coding gene_symbol:TRA2B description:transformer 2 beta homolog [Source:HGNC Symbol;Acc:HGNC:10781]	FALSE	TRUE	18.75	10	26	5	High	High	High	High	Phospho [S26(100); T33(100); S37(100); S81(100); S83(98.9); S85(90.5); S95(100); S97(100); S99(90.8); S266(89.7); S282(96.2)]	27.51
High	ENSP00000386591.1	pep chromosome:GRCh38:2:171687708:171748011:1 gene:ENSG00000077380.15 transcript:ENST00000409317.5 gene_biotype:protein_coding transcript_biotype:protein_coding gene_symbol:DYNC1I2 description:dynein cytoplasmic 1 intermediate chain 2 [Source:HGNC Symbol;Acc:HGNC:2964]	FALSE	TRUE	7.59494	2	26	2	High	High	High	High	Phospho [T89(93.2)]	38.69
High	ENSP00000309432.4	pep chromosome:GRCh38:17:42579515:42609374:-1 gene:ENSG00000141699.11 transcript:ENST00000309428.10 gene_biotype:protein_coding transcript_biotype:protein_coding gene_symbol:RETREG3 description:reticulophagy regulator family member 3 [Source:HGNC Symbol;Acc:HGNC:27258]	FALSE	TRUE	12.4464	3	14	3	High	High	High	High	Phospho [S258(100); S260(100); S320(100)]	64.18
High	ENSP00000293760.5	pep chromosome:GRCh38:6:33771213:33789130:-1 gene:ENSG00000161904.12 transcript:ENST00000293760.10 gene_biotype:protein_coding transcript_biotype:protein_coding gene_symbol:LEMD2 description:LEM domain containing 2 [Source:HGNC Symbol;Acc:HGNC:21244]	FALSE	TRUE	3.77734	4	13	4	High	High	High	High	Phospho [S134(100); S138(100); S139(100); T147(100)]	24.02
High	ENSP00000362244.2	pep chromosome:GRCh38:1:36156202:36180840:1 gene:ENSG00000116871.15 transcript:ENST00000373151.6 gene_biotype:protein_coding transcript_biotype:protein_coding gene_symbol:MAP7D1 description:MAP7 domain containing 1 [Source:HGNC Symbol;Acc:HGNC:25514]	FALSE	TRUE	10.3448	7	14	7	High	High	High	High	Phospho [S93(100); T97(100); S116(100); S399(100); S503(93.6); S544(100); S548(100); S552(100)]	34.61
High	ENSP00000306330.3	pep chromosome:GRCh38:7:76326799:76358991:-1 gene:ENSG00000170027.7 transcript:ENST00000307630.5 gene_biotype:protein_coding transcript_biotype:protein_coding gene_symbol:YWHAG description:tyrosine 3-monooxygenase/tryptophan 5-monooxygenase activation protein gamma [Source:HGNC Symbol;Acc:HGNC:12852]	FALSE	TRUE	31.5789	6	11	3	High	High	High	High	Phospho [S235(86.8)]	37.62
High	ENSP00000309629.5	pep chromosome:GRCh38:11:65854673:65858180:-1 gene:ENSG00000172757.13 transcript:ENST00000308162.10 gene_biotype:protein_coding transcript_biotype:protein_coding gene_symbol:CFL1 description:cofilin 1 [Source:HGNC Symbol;Acc:HGNC:1874]	FALSE	TRUE	52.4096	9	13	9	High	High	High	High	Phospho [S3(85.1); S156(99.5)]	24
High	ENSP00000228425.6	pep chromosome:GRCh38:12:27524206:27695564:1 gene:ENSG00000110841.14 transcript:ENST00000228425.11 gene_biotype:protein_coding transcript_biotype:protein_coding gene_symbol:PPFIBP1 description:PPFIA binding protein 1 [Source:HGNC Symbol;Acc:HGNC:9249]	FALSE	TRUE	7.06468	6	14	1	High	High	High	High	Phospho [S449(99.6); S788(100)]	32.64
High	ENSP00000479037.1	pep chromosome:GRCh38:2:54456317:54671445:1 gene:ENSG00000115306.16 transcript:ENST00000615901.4 gene_biotype:protein_coding transcript_biotype:protein_coding gene_symbol:SPTBN1 description:spectrin beta, non-erythrocytic 1 [Source:HGNC Symbol;Acc:HGNC:11275]	FALSE	TRUE	3.33897	7	20	7	High	High	High	High	Phospho [S2104(100); S2140(100); S2167(92.7); T2322(100); S2343(90.2)]	39.86
High	ENSP00000306015.4	pep chromosome:GRCh38:4:118888854:119061247:1 gene:ENSG00000172403.11 transcript:ENST00000307142.9 gene_biotype:protein_coding transcript_biotype:protein_coding gene_symbol:SYNPO2 description:synaptopodin 2 [Source:HGNC Symbol;Acc:HGNC:17732]	FALSE	TRUE	14.0365	7	22	7	High	High	High	High	Phospho [S604(85.2); T626(98.1); T723(82.5); S777(100); S902(94.3); S930(99.2)]	40.07
High	ENSP00000246194.3	pep chromosome:GRCh38:20:33993911:34084884:1 gene:ENSG00000125970.12 transcript:ENST00000246194.8 gene_biotype:protein_coding transcript_biotype:protein_coding gene_symbol:RALY description:RALY heterogeneous nuclear ribonucleoprotein [Source:HGNC Symbol;Acc:HGNC:15921]	FALSE	TRUE	13.7255	4	20	4	High	High	High	High	Phospho [S135(100); S288(99.8)]	35.28
High	ENSP00000263980.3	pep chromosome:GRCh38:1:27098809:27155125:-1 gene:ENSG00000090020.11 transcript:ENST00000263980.8 gene_biotype:protein_coding transcript_biotype:protein_coding gene_symbol:SLC9A1 description:solute carrier family 9 member A1 [Source:HGNC Symbol;Acc:HGNC:11071]	FALSE	TRUE	5.39877	4	13	4	High	High	High	High	Phospho [S693(99.7); Y708(93.8); S785(99.4)]	31.97
High	ENSP00000215793.7	pep chromosome:GRCh38:22:30331988:30356894:-1 gene:ENSG00000099995.19 transcript:ENST00000215793.13 gene_biotype:protein_coding transcript_biotype:protein_coding gene_symbol:SF3A1 description:splicing factor 3a subunit 1 [Source:HGNC Symbol;Acc:HGNC:10765]	FALSE	TRUE	6.43127	2	7	2	High	High	High	High	Phospho [S329(100); S359(100)]	36.01
High	ENSP00000375711.1	pep chromosome:GRCh38:19:49869046:49878028:-1 gene:ENSG00000204673.10 transcript:ENST00000391835.1 gene_biotype:protein_coding transcript_biotype:protein_coding gene_symbol:AKT1S1 description:AKT1 substrate 1 [Source:HGNC Symbol;Acc:HGNC:28426]	FALSE	TRUE	10.5072	4	10	4	High	High	High	High	Phospho [S232(100); T266(99.8)]	33.16
High	ENSP00000394041.1	pep chromosome:GRCh38:3:48747515:48847804:-1 gene:ENSG00000114302.16 transcript:ENST00000454963.5 gene_biotype:protein_coding transcript_biotype:protein_coding gene_symbol:PRKAR2A description:protein kinase cAMP-dependent type II regulatory subunit alpha [Source:HGNC Symbol;Acc:HGNC:9391]	FALSE	TRUE	10.8911	3	9	3	High	High	High	High	Phospho [S78(87.6); S99(100)]	38.89
High	ENSP00000478927.1	pep chromosome:GRCh38:11:102110461:102233423:1 gene:ENSG00000137693.14 transcript:ENST00000615667.4 gene_biotype:protein_coding transcript_biotype:protein_coding gene_symbol:YAP1 description:Yes associated protein 1 [Source:HGNC Symbol;Acc:HGNC:16262]	FALSE	TRUE	16.1417	4	16	4	High	High	High	High	Phospho [T63(89.9); S164(99.7); S371(87.6)]	44.18
High	ENSP00000324422.5	pep chromosome:GRCh38:7:143381345:143391111:1 gene:ENSG00000159840.16 transcript:ENST00000322764.10 gene_biotype:protein_coding transcript_biotype:protein_coding gene_symbol:ZYX description:zyxin [Source:HGNC Symbol;Acc:HGNC:13200]	FALSE	TRUE	11.8881	6	15	6	High	High	High	High	Phospho [S143(93.4); S259(99.4); S267(100); S281(100); S344(100)]	26.9
High	ENSP00000370258.4	pep chromosome:GRCh38:16:28379581:28403879:-1 gene:ENSG00000205609.12 transcript:ENST00000380876.4 gene_biotype:protein_coding transcript_biotype:protein_coding gene_symbol:EIF3CL description:eukaryotic translation initiation factor 3 subunit C like [Source:HGNC Symbol;Acc:HGNC:26347]	FALSE	TRUE	6.56455	6	14	6	High	High	High	High	Phospho [S39(100); S166(100); S178(85.8); S910(99.6)]	23.32
High	ENSP00000351811.5	pep chromosome:GRCh38:16:67873052:67884499:1 gene:ENSG00000038358.15 transcript:ENST00000358933.10 gene_biotype:protein_coding transcript_biotype:protein_coding gene_symbol:EDC4 description:enhancer of mRNA decapping 4 [Source:HGNC Symbol;Acc:HGNC:17157]	FALSE	TRUE	7.49465	5	10	5	High	High	High	High	Phospho [S844(100); S871(100); S879(98.7); S914(99.9)]	27.5
High	ENSP00000346560.3	pep chromosome:GRCh38:3:99833144:100114513:-1 gene:ENSG00000168386.18 transcript:ENST00000354552.7 gene_biotype:protein_coding transcript_biotype:protein_coding gene_symbol:FILIP1L description:filamin A interacting protein 1 like [Source:HGNC Symbol;Acc:HGNC:24589]	FALSE	TRUE	5.28634	4	20	4	High	High	High	High	Phospho [S791(100); T994(94.4); S1000(92.5)]	40.52
High	ENSP00000386456.3	pep chromosome:GRCh38:2:69457997:69643739:-1 gene:ENSG00000115977.19 transcript:ENST00000409085.9 gene_biotype:protein_coding transcript_biotype:protein_coding gene_symbol:AAK1 description:AP2 associated kinase 1 [Source:HGNC Symbol;Acc:HGNC:19679]	FALSE	TRUE	8.42872	6	27	4	High	High	High	High	Phospho [T620(100); S678(100)]	36.9
High	ENSP00000439093.1	pep chromosome:GRCh38:12:122272834:122380494:-1 gene:ENSG00000130779.20 transcript:ENST00000540338.5 gene_biotype:protein_coding transcript_biotype:protein_coding gene_symbol:CLIP1 description:CAP-Gly domain containing linker protein 1 [Source:HGNC Symbol;Acc:HGNC:10461]	FALSE	TRUE	3.82476	4	9	3	High	High	High	High	Phospho [S204(100); S348(100); S510(100); S1305(99.5)]	26.06
High	ENSP00000314724.8	pep chromosome:GRCh38:12:27524206:27695564:1 gene:ENSG00000110841.14 transcript:ENST00000318304.12 gene_biotype:protein_coding transcript_biotype:protein_coding gene_symbol:PPFIBP1 description:PPFIA binding protein 1 [Source:HGNC Symbol;Acc:HGNC:9249]	FALSE	TRUE	7.02275	6	14	1	High	High	High	High	Phospho [S466(99.6); S794(100)]	32.03
High	ENSP00000382004.4	pep chromosome:GRCh38:11:57761797:57819178:1 gene:ENSG00000198561.13 transcript:ENST00000399050.8 gene_biotype:protein_coding transcript_biotype:protein_coding gene_symbol:CTNND1 description:catenin delta 1 [Source:HGNC Symbol;Acc:HGNC:2515]	FALSE	TRUE	9.09091	6	11	6	High	High	High	High	Phospho [S230(98.8); T310(90.6); S346(100); S349(100); S861(98.9); S864(93.4); S920(99.5)]	27.9
High	ENSP00000313199.7	pep chromosome:GRCh38:4:82352498:82373991:-1 gene:ENSG00000138668.19 transcript:ENST00000313899.12 gene_biotype:protein_coding transcript_biotype:protein_coding gene_symbol:HNRNPD description:heterogeneous nuclear ribonucleoprotein D [Source:HGNC Symbol;Acc:HGNC:5036]	FALSE	TRUE	7.60563	3	26	3	High	High	High	High	Phospho [S82(92.5); S87(95.7)]	24.28
High	ENSP00000377969.3	pep chromosome:GRCh38:19:6379572:6393164:-1 gene:ENSG00000125651.14 transcript:ENST00000394456.10 gene_biotype:protein_coding transcript_biotype:protein_coding gene_symbol:GTF2F1 description:general transcription factor IIF subunit 1 [Source:HGNC Symbol;Acc:HGNC:4652]	FALSE	TRUE	15.4739	4	16	4	High	High	High	High	Phospho [S217(94.1); S221(100); S224(100); S311(99.1); T331(100); T389(100)]	47.84
High	ENSP00000354718.2	pep chromosome:GRCh38:15:85380729:85745610:1 gene:ENSG00000170776.21 transcript:ENST00000361243.6 gene_biotype:protein_coding transcript_biotype:protein_coding gene_symbol:AKAP13 description:A-kinase anchoring protein 13 [Source:HGNC Symbol;Acc:HGNC:371]	FALSE	TRUE	4.29535	6	9	6	High	High	High	High	Phospho [S345(97.3); S1565(100); S1646(100); S2732(100)]	30.32
High	ENSP00000263102.6	pep chromosome:GRCh38:10:59788747:59906556:-1 gene:ENSG00000108091.11 transcript:ENST00000263102.7 gene_biotype:protein_coding transcript_biotype:protein_coding gene_symbol:CCDC6 description:coiled-coil domain containing 6 [Source:HGNC Symbol;Acc:HGNC:18782]	FALSE	TRUE	6.96203	3	19	3	High	High	High	High	Phospho [S244(100); S328(100); S419(100)]	47.02
High	ENSP00000487356.1	pep chromosome:GRCh38:CHR_HSCHR17_2_CTG2:1247054:1303157:-1 gene:ENSG00000274474.3 transcript:ENST00000627231.2 gene_biotype:protein_coding transcript_biotype:protein_coding gene_symbol:YWHAE description:tyrosine 3-monooxygenase/tryptophan 5-monooxygenase activation protein epsilon [Source:HGNC Symbol;Acc:HGNC:12851]	FALSE	TRUE	26.2745	6	9	3	High	High	High	High	Phospho [S210(100)]	27.18
High	ENSP00000497602.1	pep chromosome:GRCh38:1:40979696:41012565:1 gene:ENSG00000171793.16 transcript:ENST00000650070.2 gene_biotype:protein_coding transcript_biotype:protein_coding gene_symbol:CTPS1 description:CTP synthase 1 [Source:HGNC Symbol;Acc:HGNC:2519]	FALSE	TRUE	3.38409	2	17	2	High	High	High	High	Phospho [S574(99.7); S575(100)]	44.91
High	ENSP00000238081.3	pep chromosome:GRCh38:2:9583967:9630997:-1 gene:ENSG00000134308.14 transcript:ENST00000238081.8 gene_biotype:protein_coding transcript_biotype:protein_coding gene_symbol:YWHAQ description:tyrosine 3-monooxygenase/tryptophan 5-monooxygenase activation protein theta [Source:HGNC Symbol;Acc:HGNC:12854]	FALSE	TRUE	27.7551	6	11	3	High	High	High	High	Phospho [S232(100)]	41.72
High	ENSP00000263991.5	pep chromosome:GRCh38:2:62705866:63046487:1 gene:ENSG00000115504.14 transcript:ENST00000263991.9 gene_biotype:protein_coding transcript_biotype:protein_coding gene_symbol:EHBP1 description:EH domain binding protein 1 [Source:HGNC Symbol;Acc:HGNC:29144]	FALSE	TRUE	8.28595	7	12	7	High	High	High	High	Phospho [T378(94.1); S432(100); S436(100); S751(100); S787(100); S1035(100); S1058(100)]	24.87
High	ENSP00000383700.2	pep chromosome:GRCh38:1:8352404:8817640:-1 gene:ENSG00000142599.19 transcript:ENST00000400908.7 gene_biotype:protein_coding transcript_biotype:protein_coding gene_symbol:RERE description:arginine-glutamic acid dipeptide repeats [Source:HGNC Symbol;Acc:HGNC:9965]	FALSE	TRUE	5.17241	6	8	6	High	High	High	High	Phospho [S53(100); S56(100); S600(100); S613(99); S656(99.7); S679(100)]	27.91
High	ENSP00000240328.3	pep chromosome:GRCh38:17:61399843:61409466:1 gene:ENSG00000121068.14 transcript:ENST00000240328.4 gene_biotype:protein_coding transcript_biotype:protein_coding gene_symbol:TBX2 description:T-box transcription factor 2 [Source:HGNC Symbol;Acc:HGNC:11597]	FALSE	TRUE	10.5337	6	14	6	High	High	High	High	Phospho [S320(99.9); S360(100); S368(100); S653(100); S657(100); S676(94.2)]	21.1
High	ENSP00000243077.3	pep chromosome:GRCh38:12:57128483:57213361:1 gene:ENSG00000123384.14 transcript:ENST00000243077.8 gene_biotype:protein_coding transcript_biotype:protein_coding gene_symbol:LRP1 description:LDL receptor related protein 1 [Source:HGNC Symbol;Acc:HGNC:6692]	FALSE	TRUE	1.76056	5	10	5	High	High	High	High	Phospho [S236(84.9); T254(86.8); S4520(100); S4523(96.1)]	25.28
High	ENSP00000384537.2	pep chromosome:GRCh38:6:151239967:151358559:1 gene:ENSG00000131016.17 transcript:ENST00000402676.7 gene_biotype:protein_coding transcript_biotype:protein_coding gene_symbol:AKAP12 description:A-kinase anchoring protein 12 [Source:HGNC Symbol;Acc:HGNC:370]	FALSE	TRUE	3.53535	5	19	5	High	High	High	High	Phospho [S371(100); S598(100); S627(97.7); S698(99.9); S1331(99.9)]	36.98
High	ENSP00000398880.3	pep chromosome:GRCh38:17:39461486:39534544:1 gene:ENSG00000167258.14 transcript:ENST00000447079.5 gene_biotype:protein_coding transcript_biotype:protein_coding gene_symbol:CDK12 description:cyclin dependent kinase 12 [Source:HGNC Symbol;Acc:HGNC:24224]	FALSE	TRUE	6.77852	10	14	9	High	High	High	High	Phospho [S215(100); S251(93.6); S265(99.9); S293(99.5); S325(95.2); S423(99.2); T1244(90.7)]	19.51
High	ENSP00000425631.1	pep chromosome:GRCh38:4:41538157:41700044:1 gene:ENSG00000064042.18 transcript:ENST00000503057.6 gene_biotype:protein_coding transcript_biotype:protein_coding gene_symbol:LIMCH1 description:LIM and calponin homology domains 1 [Source:HGNC Symbol;Acc:HGNC:29191]	FALSE	TRUE	5.93047	8	12	7	High	High	High	High	Phospho [S10(100); S48(99.9); S72(100); S1103(100); S1357(99.3)]	30.1
High	ENSP00000415576.2	pep chromosome:GRCh38:4:94207845:94290821:1 gene:ENSG00000163104.17 transcript:ENST00000457823.6 gene_biotype:protein_coding transcript_biotype:protein_coding gene_symbol:SMARCAD1 description:SWI/SNF-related, matrix-associated actin-dependent regulator of chromatin, subfamily a, containing DEAD/H box 1 [Source:HGNC Symbol;Acc:HGNC:18398]	FALSE	TRUE	10.6031	5	9	5	High	High	High	High	Phospho [S34(79.6); S39(82.6); T54(99.9); S124(100); S127(98.1); S213(79.2); S214(94.7); Y217(98.1); S239(100); S242(100)]	29.91
High	ENSP00000456480.1	pep chromosome:GRCh38:16:11976734:12574287:1 gene:ENSG00000048471.14 transcript:ENST00000566228.6 gene_biotype:protein_coding transcript_biotype:protein_coding gene_symbol:SNX29 description:sorting nexin 29 [Source:HGNC Symbol;Acc:HGNC:30542]	FALSE	TRUE	7.13407	4	10	4	High	High	High	High	Phospho [S344(100); S639(98.7); S810(100)]	44.24
High	ENSP00000359988.3	pep chromosome:GRCh38:1:70205724:70253052:1 gene:ENSG00000116754.13 transcript:ENST00000370950.7 gene_biotype:protein_coding transcript_biotype:protein_coding gene_symbol:SRSF11 description:serine and arginine rich splicing factor 11 [Source:HGNC Symbol;Acc:HGNC:10782]	FALSE	TRUE	14.2562	9	18	9	High	High	High	High	Phospho [S207(95.2); S366(100); S368(100); S370(100); S414(94.2); S434(100); S449(99.9); S456(100)]	32.13
High	ENSP00000348128.4	pep chromosome:GRCh38:10:29458059:29634972:-1 gene:ENSG00000197321.14 transcript:ENST00000355867.8 gene_biotype:protein_coding transcript_biotype:protein_coding gene_symbol:SVIL description:supervillin [Source:HGNC Symbol;Acc:HGNC:11480]	FALSE	TRUE	5.73622	9	17	9	High	High	High	High	Phospho [S245(100); S467(100); S673(78.8); S707(100)]	34.15
High	ENSP00000266732.4	pep chromosome:GRCh38:12:98515630:98535634:1 gene:ENSG00000120802.13 transcript:ENST00000266732.8 gene_biotype:protein_coding transcript_biotype:protein_coding gene_symbol:TMPO description:thymopoietin [Source:HGNC Symbol;Acc:HGNC:11875]	FALSE	TRUE	7.06052	3	12	3	High	High	High	High	Phospho [T74(100); T160(87.4)]	33.48
High	ENSP00000275820.3	pep chromosome:GRCh38:7:156949712:156973176:1 gene:ENSG00000146909.8 transcript:ENST00000275820.4 gene_biotype:protein_coding transcript_biotype:protein_coding gene_symbol:NOM1 description:nucleolar protein with MIF4G domain 1 [Source:HGNC Symbol;Acc:HGNC:13244]	FALSE	TRUE	6.04651	6	7	6	High	High	High	High	Phospho [S139(100); S280(100); T287(100); S317(100); S320(100); S321(100)]	33.13
High	ENSP00000040738.5	pep chromosome:GRCh38:4:13568738:13627725:-1 gene:ENSG00000038219.13 transcript:ENST00000040738.10 gene_biotype:protein_coding transcript_biotype:protein_coding gene_symbol:BOD1L1 description:biorientation of chromosomes in cell division 1 like 1 [Source:HGNC Symbol;Acc:HGNC:31792]	FALSE	TRUE	3.47427	7	10	6	High	High	High	High	Phospho [S482(99.5); T1529(92.7); S2779(99.2); S2780(99.2); S2986(99.6); S3029(100)]	24.9
High	ENSP00000341171.6	pep chromosome:GRCh38:16:70661204:70686053:-1 gene:ENSG00000132613.15 transcript:ENST00000338779.11 gene_biotype:protein_coding transcript_biotype:protein_coding gene_symbol:MTSS2 description:MTSS I-BAR domain containing 2 [Source:HGNC Symbol;Acc:HGNC:25094]	FALSE	TRUE	9.77242	5	14	5	High	High	High	High	Phospho [T260(100); S264(98.8); S456(100); S601(99.6); S612(100); S673(100)]	28.78
High	ENSP00000248553.6	pep chromosome:GRCh38:7:76302673:76304292:1 gene:ENSG00000106211.9 transcript:ENST00000248553.7 gene_biotype:protein_coding transcript_biotype:protein_coding gene_symbol:HSPB1 description:heat shock protein family B (small) member 1 [Source:HGNC Symbol;Acc:HGNC:5246]	FALSE	TRUE	42.439	8	15	8	High	High	High	High	Phospho [S15(100); S82(95.6); S199(100)]	34.97
High	ENSP00000343690.5	pep chromosome:GRCh38:5:147390808:147510068:-1 gene:ENSG00000113657.13 transcript:ENST00000343218.10 gene_biotype:protein_coding transcript_biotype:protein_coding gene_symbol:DPYSL3 description:dihydropyrimidinase like 3 [Source:HGNC Symbol;Acc:HGNC:3015]	FALSE	TRUE	7.89474	5	14	5	High	High	High	High	Phospho [S102(100); T623(95.3); T628(100); S636(99)]	22.34
High	ENSP00000360078.1	pep chromosome:GRCh38:1:66533592:66745085:1 gene:ENSG00000118473.22 transcript:ENST00000371039.5 gene_biotype:protein_coding transcript_biotype:protein_coding gene_symbol:SGIP1 description:SH3 domain GRB2 like endophilin interacting protein 1 [Source:HGNC Symbol;Acc:HGNC:25412]	FALSE	TRUE	14.2631	8	16	8	High	High	High	High	Phospho [T25(93); T148(95.6); S204(99.9); T213(84.5); T227(100); S256(76.9)]	25.77
High	ENSP00000336752.6	pep chromosome:GRCh38:4:53377641:53460862:1 gene:ENSG00000145216.16 transcript:ENST00000337488.11 gene_biotype:protein_coding transcript_biotype:protein_coding gene_symbol:FIP1L1 description:factor interacting with PAPOLA and CPSF1 [Source:HGNC Symbol;Acc:HGNC:19124]	FALSE	TRUE	12.4579	5	8	4	High	High	High	High	Phospho [S85(100); S87(100); S89(100); S492(100); S496(100); S554(100); S579(100)]	23.94
High	ENSP00000355082.4	pep chromosome:GRCh38:4:137518918:137532475:-1 gene:ENSG00000189184.11 transcript:ENST00000344876.8 gene_biotype:protein_coding transcript_biotype:protein_coding gene_symbol:PCDH18 description:protocadherin 18 [Source:HGNC Symbol;Acc:HGNC:14268]	FALSE	TRUE	4.93392	4	16	4	High	High	High	High	Phospho [S781(98.7); S782(98.9); S883(99.3); S891(100)]	35.66
High	ENSP00000366396.3	pep chromosome:GRCh38:20:21303331:21389825:1 gene:ENSG00000088930.8 transcript:ENST00000377191.5 gene_biotype:protein_coding transcript_biotype:protein_coding gene_symbol:XRN2 description:5'-3' exoribonuclease 2 [Source:HGNC Symbol;Acc:HGNC:12836]	FALSE	TRUE	3.05263	4	9	4	High	High	High	High	Phospho [S448(99.6); S499(100); S501(100)]	32.22
High	ENSP00000362649.3	pep chromosome:GRCh38:1:32292083:32333626:1 gene:ENSG00000116478.12 transcript:ENST00000373548.8 gene_biotype:protein_coding transcript_biotype:protein_coding gene_symbol:HDAC1 description:histone deacetylase 1 [Source:HGNC Symbol;Acc:HGNC:4852]	FALSE	TRUE	10.7884	3	6	3	High	High	High	High	Phospho [S393(100); S421(100); S423(100)]	24.9
High	ENSP00000313851.10	pep chromosome:GRCh38:13:32586452:32778019:1 gene:ENSG00000083642.19 transcript:ENST00000315596.15 gene_biotype:protein_coding transcript_biotype:protein_coding gene_symbol:PDS5B description:PDS5 cohesin associated factor B [Source:HGNC Symbol;Acc:HGNC:20418]	FALSE	TRUE	3.59364	3	14	3	High	High	High	High	Phospho [S1166(99.9); T1255(96); S1358(95.3)]	31.68
High	ENSP00000354125.4	pep chromosome:GRCh38:7:2354827:2380745:1 gene:ENSG00000106263.18 transcript:ENST00000360876.9 gene_biotype:protein_coding transcript_biotype:protein_coding gene_symbol:EIF3B description:eukaryotic translation initiation factor 3 subunit B [Source:HGNC Symbol;Acc:HGNC:3280]	FALSE	TRUE	7.86241	3	9	3	High	High	High	High	Phospho [S119(100)]	28.77
High	ENSP00000482075.1	pep chromosome:GRCh38:12:56663343:56688408:-1 gene:ENSG00000110958.16 transcript:ENST00000614328.4 gene_biotype:protein_coding transcript_biotype:protein_coding gene_symbol:PTGES3 description:prostaglandin E synthase 3 [Source:HGNC Symbol;Acc:HGNC:16049]	FALSE	TRUE	32.3171	3	23	2	High	High	High	High	Phospho [S117(100); S152(100); S155(100)]	91.59
High	ENSP00000386538.3	pep chromosome:GRCh38:16:30357102:30370494:-1 gene:ENSG00000169221.14 transcript:ENST00000409939.8 gene_biotype:protein_coding transcript_biotype:protein_coding gene_symbol:TBC1D10B description:TBC1 domain family member 10B [Source:HGNC Symbol;Acc:HGNC:24510]	FALSE	TRUE	6.93069	4	7	4	High	High	High	High	Phospho [S22(100); S132(100); T148(98.4); S678(100)]	15.84
High	ENSP00000292823.2	pep chromosome:GRCh38:3:196234368:196287713:-1 gene:ENSG00000161217.12 transcript:ENST00000292823.6 gene_biotype:protein_coding transcript_biotype:protein_coding gene_symbol:PCYT1A description:phosphate cytidylyltransferase 1, choline, alpha [Source:HGNC Symbol;Acc:HGNC:8754]	FALSE	TRUE	14.1689	8	18	8	High	High	High	High	Phospho [S315(100); S319(99.9); S329(91.6); S343(99.5); S347(100); S362(100)]	40.13
High	ENSP00000353408.5	pep chromosome:GRCh38:X:65667654:65741931:1 gene:ENSG00000147065.17 transcript:ENST00000360270.7 gene_biotype:protein_coding transcript_biotype:protein_coding gene_symbol:MSN description:moesin [Source:HGNC Symbol;Acc:HGNC:7373]	FALSE	TRUE	11.7851	8	11	8	High	High	High	High	Phospho [S384(100); S504(100); S576(100)]	24.53
High	ENSP00000343023.4	pep chromosome:GRCh38:2:230416201:230545606:1 gene:ENSG00000067066.17 transcript:ENST00000340126.9 gene_biotype:protein_coding transcript_biotype:protein_coding gene_symbol:SP100 description:SP100 nuclear antigen [Source:HGNC Symbol;Acc:HGNC:11206]	FALSE	TRUE	7.00565	3	13	3	High	High	High	High	Phospho [S157(100); S223(87.6); S228(100); S231(100); S409(100); S410(100)]	54.25
High	ENSP00000252699.2	pep chromosome:GRCh38:19:38647649:38731589:1 gene:ENSG00000130402.12 transcript:ENST00000252699.7 gene_biotype:protein_coding transcript_biotype:protein_coding gene_symbol:ACTN4 description:actinin alpha 4 [Source:HGNC Symbol;Acc:HGNC:166]	FALSE	TRUE	8.45225	6	7	2	High	High	High	High	Phospho [S159(100); S909(100)]	19.06
High	ENSP00000238647.3	pep chromosome:GRCh38:14:77024543:77028708:-1 gene:ENSG00000119669.5 transcript:ENST00000238647.5 gene_biotype:protein_coding transcript_biotype:protein_coding gene_symbol:IRF2BPL description:interferon regulatory factor 2 binding protein like [Source:HGNC Symbol;Acc:HGNC:14282]	FALSE	TRUE	9.79899	6	10	6	High	High	High	High	Phospho [S69(100); S215(99.9); S334(91); S547(100); S659(92.5)]	24.17
High	ENSP00000221566.1	pep chromosome:GRCh38:19:2754715:2783273:-1 gene:ENSG00000104969.10 transcript:ENST00000221566.7 gene_biotype:protein_coding transcript_biotype:protein_coding gene_symbol:SGTA description:small glutamine rich tetratricopeptide repeat containing alpha [Source:HGNC Symbol;Acc:HGNC:10819]	FALSE	TRUE	13.099	5	16	5	High	High	High	High	Phospho [T81(100)]	33.46
High	ENSP00000493780.1	pep chromosome:GRCh38:9:69035750:69255187:1 gene:ENSG00000285130.2 transcript:ENST00000642889.1 gene_biotype:protein_coding transcript_biotype:protein_coding gene_symbol:AL358113.1 description:novel protein	FALSE	TRUE	6.74754	10	16	10	High	High	High	High	Phospho [S292(100); S373(100); Y394(92.8); S421(100); S425(100); S544(90.7); S1107(94.5); S1115(100); S1288(100)]	39.24
High	ENSP00000360727.6	pep chromosome:GRCh38:9:136807967:136841177:1 gene:ENSG00000196642.19 transcript:ENST00000371663.10 gene_biotype:protein_coding transcript_biotype:protein_coding gene_symbol:RABL6 description:RAB, member RAS oncogene family like 6 [Source:HGNC Symbol;Acc:HGNC:24703]	FALSE	TRUE	13.6986	4	9	4	High	High	High	High	Phospho [S426(100); S428(100); S597(100); T600(100)]	23.78
High	ENSP00000366672.3	pep chromosome:GRCh38:20:18587893:18763917:1 gene:ENSG00000125821.12 transcript:ENST00000377452.3 gene_biotype:protein_coding transcript_biotype:protein_coding gene_symbol:DTD1 description:D-aminoacyl-tRNA deacylase 1 [Source:HGNC Symbol;Acc:HGNC:16219]	FALSE	TRUE	11.0048	3	16	3	High	High	High	High	Phospho [S197(99.6)]	45.37
High	ENSP00000404121.1	pep chromosome:GRCh38:19:10654261:10692417:1 gene:ENSG00000129351.17 transcript:ENST00000449870.5 gene_biotype:protein_coding transcript_biotype:protein_coding gene_symbol:ILF3 description:interleukin enhancer binding factor 3 [Source:HGNC Symbol;Acc:HGNC:6038]	FALSE	TRUE	9.1314	4	23	4	High	High	High	High	Phospho [S62(100); S382(98.8); S482(80.7)]	45.1
High	ENSP00000364403.3	pep chromosome:GRCh38:1:19074510:19210266:-1 gene:ENSG00000127481.15 transcript:ENST00000375254.8 gene_biotype:protein_coding transcript_biotype:protein_coding gene_symbol:UBR4 description:ubiquitin protein ligase E3 component n-recognin 4 [Source:HGNC Symbol;Acc:HGNC:30313]	FALSE	TRUE	1.13834	5	21	5	High	High	High	High	Phospho [S1762(89.1); T2724(100)]	30.84
High	ENSP00000377681.3	pep chromosome:GRCh38:5:151771910:151812785:1 gene:ENSG00000145907.15 transcript:ENST00000394123.7 gene_biotype:protein_coding transcript_biotype:protein_coding gene_symbol:G3BP1 description:G3BP stress granule assembly factor 1 [Source:HGNC Symbol;Acc:HGNC:30292]	FALSE	TRUE	9.65665	2	13	2	High	High	High	High	Phospho [S149(100)]	40.62
High	ENSP00000382382.2	pep chromosome:GRCh38:11:11842066:11959323:1 gene:ENSG00000170242.18 transcript:ENST00000399455.2 gene_biotype:protein_coding transcript_biotype:protein_coding gene_symbol:USP47 description:ubiquitin specific peptidase 47 [Source:HGNC Symbol;Acc:HGNC:20076]	FALSE	TRUE	2.83636	3	9	3	High	High	High	High	Phospho [S910(100); S1013(93.8)]	30.11
High	ENSP00000430432.1	pep chromosome:GRCh38:6:113933028:113971148:-1 gene:ENSG00000196591.12 transcript:ENST00000519065.6 gene_biotype:protein_coding transcript_biotype:protein_coding gene_symbol:HDAC2 description:histone deacetylase 2 [Source:HGNC Symbol;Acc:HGNC:4853]	FALSE	TRUE	10.6557	3	7	3	High	High	High	High	Phospho [S394(100); S422(100); S424(100)]	28.35
High	ENSP00000420381.1	pep chromosome:GRCh38:7:128739404:128769936:1 gene:ENSG00000128595.17 transcript:ENST00000479257.5 gene_biotype:protein_coding transcript_biotype:protein_coding gene_symbol:CALU description:calumenin [Source:HGNC Symbol;Acc:HGNC:1458]	FALSE	TRUE	31.5789	7	8	7	High	High	High	High	Phospho [S52(89.1)]	17.43
High	ENSP00000243286.3	pep chromosome:GRCh38:X:103607906:103609926:1 gene:ENSG00000196507.11 transcript:ENST00000243286.7 gene_biotype:protein_coding transcript_biotype:protein_coding gene_symbol:TCEAL3 description:transcription elongation factor A like 3 [Source:HGNC Symbol;Acc:HGNC:28247]	FALSE	TRUE	21.5	4	12	4	High	High	High	High	Phospho [S65(100); S125(100)]	43.6
High	ENSP00000358789.4	pep chromosome:GRCh38:10:103594027:103855543:-1 gene:ENSG00000107957.16 transcript:ENST00000369774.8 gene_biotype:protein_coding transcript_biotype:protein_coding gene_symbol:SH3PXD2A description:SH3 and PX domains 2A [Source:HGNC Symbol;Acc:HGNC:23664]	FALSE	TRUE	8.82613	8	19	8	High	High	High	High	Phospho [S547(100); S722(94.5); S769(100); S795(91.4); S925(100)]	38.19
High	ENSP00000265717.4	pep chromosome:GRCh38:7:107044705:107161811:1 gene:ENSG00000005249.13 transcript:ENST00000265717.5 gene_biotype:protein_coding transcript_biotype:protein_coding gene_symbol:PRKAR2B description:protein kinase cAMP-dependent type II regulatory subunit beta [Source:HGNC Symbol;Acc:HGNC:9392]	FALSE	TRUE	13.6364	2	7	2	High	High	High	High	Phospho [S83(100); S85(100); S114(100)]	31.55
High	ENSP00000392065.2	pep chromosome:GRCh38:6:138903493:138988257:-1 gene:ENSG00000135597.18 transcript:ENST00000450536.6 gene_biotype:protein_coding transcript_biotype:protein_coding gene_symbol:REPS1 description:RALBP1 associated Eps domain containing 1 [Source:HGNC Symbol;Acc:HGNC:15578]	FALSE	TRUE	10.6784	5	19	5	High	High	High	High	Phospho [S272(100); S273(99.8); S482(98.8); T539(83.8); S540(83.8); S562(99.7); S709(100)]	22.23
High	ENSP00000483316.1	pep chromosome:GRCh38:CHR_HSCHR16_1_CTG1:16034737:16228097:1 gene:ENSG00000278183.4 transcript:ENST00000621144.4 gene_biotype:protein_coding transcript_biotype:protein_coding gene_symbol:ABCC1 description:ATP binding cassette subfamily C member 1 [Source:HGNC Symbol;Acc:HGNC:51]	FALSE	TRUE	1.5676	2	23	2	High	High	High	High	Phospho [S918(92.8); S919(88.4); S930(97.4)]	46.26
High	ENSP00000349856.4	pep chromosome:GRCh38:9:131430090:131500171:1 gene:ENSG00000130723.20 transcript:ENST00000357304.8 gene_biotype:protein_coding transcript_biotype:protein_coding gene_symbol:PRRC2B description:proline rich coiled-coil 2B [Source:HGNC Symbol;Acc:HGNC:28121]	FALSE	TRUE	3.49933	6	10	6	High	High	High	High	Phospho [S388(100); S480(100); S556(94.2); S613(100); S853(100); S1139(99.3)]	24.18
High	ENSP00000395249.2	pep chromosome:GRCh38:2:219178275:219185475:1 gene:ENSG00000144567.11 transcript:ENST00000430297.7 gene_biotype:protein_coding transcript_biotype:protein_coding gene_symbol:RETREG2 description:reticulophagy regulator family member 2 [Source:HGNC Symbol;Acc:HGNC:28450]	FALSE	TRUE	13.628	3	8	3	High	High	High	High	Phospho [S281; S283; T330(86.8); S385(100)]	23.76
High	ENSP00000301015.9	pep chromosome:GRCh38:16:88715338:88785220:-1 gene:ENSG00000103335.22 transcript:ENST00000301015.14 gene_biotype:protein_coding transcript_biotype:protein_coding gene_symbol:PIEZO1 description:piezo type mechanosensitive ion channel component 1 [Source:HGNC Symbol;Acc:HGNC:28993]	FALSE	TRUE	1.62634	4	13	4	High	High	High	High	Phospho [S1391(100); S1621(100); S1646(100)]	25.73
High	ENSP00000347464.3	pep chromosome:GRCh38:12:109929804:109996368:-1 gene:ENSG00000139436.21 transcript:ENST00000355312.8 gene_biotype:protein_coding transcript_biotype:protein_coding gene_symbol:GIT2 description:GIT ArfGAP 2 [Source:HGNC Symbol;Acc:HGNC:4273]	FALSE	TRUE	7.90514	2	9	2	High	High	High	High	Phospho [S394(88.6); S397(100); T587(89.3)]	26.8
High	ENSP00000312625.5	pep chromosome:GRCh38:1:20742679:20786652:-1 gene:ENSG00000127483.18 transcript:ENST00000312239.10 gene_biotype:protein_coding transcript_biotype:protein_coding gene_symbol:HP1BP3 description:heterochromatin protein 1 binding protein 3 [Source:HGNC Symbol;Acc:HGNC:24973]	FALSE	TRUE	7.23327	2	10	2	High	High	High	High	Phospho [T51(100); S446(100)]	33.86
High	ENSP00000414727.3	pep chromosome:GRCh38:19:10984152:11062282:1 gene:ENSG00000127616.18 transcript:ENST00000413806.7 gene_biotype:protein_coding transcript_biotype:protein_coding gene_symbol:SMARCA4 description:SWI/SNF related, matrix associated, actin dependent regulator of chromatin, subfamily a, member 4 [Source:HGNC Symbol;Acc:HGNC:11100]	FALSE	TRUE	5.77037	6	11	6	High	High	High	High	Phospho [S724(92.6); S726(92.6); S1604(100); S1609(100); S1661(100); S1665(100)]	26.83
High	ENSP00000222693.4	pep chromosome:GRCh38:7:116499738:116508541:1 gene:ENSG00000105971.15 transcript:ENST00000222693.5 gene_biotype:protein_coding transcript_biotype:protein_coding gene_symbol:CAV2 description:caveolin 2 [Source:HGNC Symbol;Acc:HGNC:1528]	FALSE	TRUE	22.8395	2	19	2	High	High	High	High	Phospho [S20(94.5); S23(94.5); S36(100)]	39.73
High	ENSP00000388526.2	pep chromosome:GRCh38:CHR_HSCHR6_MHC_DBB_CTG1:29932205:29935859:1 gene:ENSG00000235657.9 transcript:ENST00000438861.6 gene_biotype:protein_coding transcript_biotype:protein_coding gene_symbol:HLA-A description:major histocompatibility complex, class I, A [Source:HGNC Symbol;Acc:HGNC:4931]	FALSE	TRUE	6.73854	2	7	2	High	High	High	High	Phospho [S362(99.8)]	20.75
High	ENSP00000359958.3	pep chromosome:GRCh38:1:71063291:71081035:-1 gene:ENSG00000132485.14 transcript:ENST00000370920.8 gene_biotype:protein_coding transcript_biotype:protein_coding gene_symbol:ZRANB2 description:zinc finger RANBP2-type containing 2 [Source:HGNC Symbol;Acc:HGNC:13058]	FALSE	TRUE	20.6061	6	15	1	Medium	Medium	Medium	Medium	Phospho [S120(100); S153(100); S188(100); T303(100); S305(100); S307(100)]	35.49
High	ENSP00000414892.2	pep chromosome:GRCh38:12:56664167:56688284:-1 gene:ENSG00000110958.16 transcript:ENST00000448157.6 gene_biotype:protein_coding transcript_biotype:protein_coding gene_symbol:PTGES3 description:prostaglandin E synthase 3 [Source:HGNC Symbol;Acc:HGNC:16049]	FALSE	TRUE	23.0216	2	22	1	High	High	High	High	Phospho [S113(100); S130(98.5)]	86.38
High	ENSP00000368767.4	pep chromosome:GRCh38:8:61500556:61714592:-1 gene:ENSG00000198363.18 transcript:ENST00000379454.9 gene_biotype:protein_coding transcript_biotype:protein_coding gene_symbol:ASPH description:aspartate beta-hydroxylase [Source:HGNC Symbol;Acc:HGNC:757]	FALSE	TRUE	8.04749	2	15	2	High	High	High	High	Phospho [S29(99.3)]	32.39
High	ENSP00000449396.1	pep chromosome:GRCh38:12:56162359:56189483:-1 gene:ENSG00000139613.12 transcript:ENST00000550164.6 gene_biotype:protein_coding transcript_biotype:protein_coding gene_symbol:SMARCC2 description:SWI/SNF related, matrix associated, actin dependent regulator of chromatin subfamily c member 2 [Source:HGNC Symbol;Acc:HGNC:11105]	FALSE	TRUE	3.53414	4	6	4	High	High	High	High	Phospho [S283(99.6); S302(100); S304(99.9); S347(100)]	18.42
High	ENSP00000387526.2	pep chromosome:GRCh38:CHR_HSCHR6_MHC_COX_CTG1:30666252:30677079:-1 gene:ENSG00000231247.8 transcript:ENST00000435929.6 gene_biotype:protein_coding transcript_biotype:protein_coding gene_symbol:PPP1R18 description:protein phosphatase 1 regulatory subunit 18 [Source:HGNC Symbol;Acc:HGNC:29413]	FALSE	TRUE	17.292	8	13	8	High	High	High	High	Phospho [S125(100); S145(100); S195(100); S209(100); S213(100); S224(100); S308(89.8); S432(100)]	19.24
High	ENSP00000420331.1	pep chromosome:GRCh38:3:169966808:169993831:1 gene:ENSG00000008952.17 transcript:ENST00000480708.5 gene_biotype:protein_coding transcript_biotype:protein_coding gene_symbol:SEC62 description:SEC62 homolog, preprotein translocation factor [Source:HGNC Symbol;Acc:HGNC:11846]	FALSE	TRUE	15.5388	8	15	8	High	High	High	High	Phospho [T158(100); S341(99.7); T375(100)]	32.89
High	ENSP00000409074.1	pep chromosome:GRCh38:CHR_HSCHR6_MHC_DBB_CTG1:30531607:30547405:-1 gene:ENSG00000229470.9 transcript:ENST00000428189.5 gene_biotype:protein_coding transcript_biotype:protein_coding gene_symbol:GNL1 description:G protein nucleolar 1 (putative) [Source:HGNC Symbol;Acc:HGNC:4413]	FALSE	TRUE	5.10708	3	14	3	High	High	High	High	Phospho [S32(93); S51(91)]	17.22
High	ENSP00000489051.1	pep chromosome:GRCh38:1:20807319:21176836:-1 gene:ENSG00000075151.20 transcript:ENST00000634879.1 gene_biotype:protein_coding transcript_biotype:protein_coding gene_symbol:EIF4G3 description:eukaryotic translation initiation factor 4 gamma 3 [Source:HGNC Symbol;Acc:HGNC:3298]	FALSE	TRUE	5.29876	6	14	6	High	High	High	High	Phospho [S493(82.1); S684(100); S1596(91.2); S1771(100)]	27.79
High	ENSP00000361524.3	pep chromosome:GRCh38:9:129827290:129835275:-1 gene:ENSG00000136819.15 transcript:ENST00000372447.7 gene_biotype:protein_coding transcript_biotype:protein_coding gene_symbol:C9orf78 description:chromosome 9 open reading frame 78 [Source:HGNC Symbol;Acc:HGNC:24932]	FALSE	TRUE	11.7647	4	9	4	High	High	High	High	Phospho [S15(100); S17(100); S261(100)]	26.33
High	ENSP00000495631.1	pep chromosome:GRCh38:13:111115453:111305727:1 gene:ENSG00000102606.18 transcript:ENST00000646102.1 gene_biotype:protein_coding transcript_biotype:protein_coding gene_symbol:ARHGEF7 description:Rho guanine nucleotide exchange factor 7 [Source:HGNC Symbol;Acc:HGNC:15607]	FALSE	TRUE	5.45244	5	7	2	High	High	High	High	Phospho [S497(100); S673(100); S682(97); S776(100)]	17.97
High	ENSP00000325827.7	pep chromosome:GRCh38:9:136440097:136477689:-1 gene:ENSG00000148396.18 transcript:ENST00000313050.11 gene_biotype:protein_coding transcript_biotype:protein_coding gene_symbol:SEC16A description:SEC16 homolog A, endoplasmic reticulum export factor [Source:HGNC Symbol;Acc:HGNC:29006]	FALSE	TRUE	2.96988	5	10	5	High	High	High	High	Phospho [S342(100); S1964(100)]	24.78
High	ENSP00000385848.2	pep chromosome:GRCh38:2:204545475:205620162:1 gene:ENSG00000116117.18 transcript:ENST00000406610.7 gene_biotype:protein_coding transcript_biotype:protein_coding gene_symbol:PARD3B description:par-3 family cell polarity regulator beta [Source:HGNC Symbol;Acc:HGNC:14446]	FALSE	TRUE	6.47303	6	10	6	High	High	High	High	Phospho [S90(90); S140(90.1); S746(99.5); S1184(100)]	17.43
High	ENSP00000407238.1	pep chromosome:GRCh38:14:104865313:104896770:1 gene:ENSG00000099814.16 transcript:ENST00000453495.2 gene_biotype:protein_coding transcript_biotype:protein_coding gene_symbol:CEP170B description:centrosomal protein 170B [Source:HGNC Symbol;Acc:HGNC:20362]	FALSE	TRUE	5.91195	6	9	6	High	High	High	High	Phospho [S361(99.8); S620(100); S1136(100); S1180(98.5)]	23.3
High	ENSP00000393316.2	pep chromosome:GRCh38:14:51240247:51257655:1 gene:ENSG00000139921.13 transcript:ENST00000457354.7 gene_biotype:protein_coding transcript_biotype:protein_coding gene_symbol:TMX1 description:thioredoxin related transmembrane protein 1 [Source:HGNC Symbol;Acc:HGNC:15487]	FALSE	TRUE	7.5	2	10	2	High	High	High	High	Phospho [S247(100)]	46.43
High	ENSP00000357448.3	pep chromosome:GRCh38:1:154944080:154956099:-1 gene:ENSG00000163346.17 transcript:ENST00000368463.8 gene_biotype:protein_coding transcript_biotype:protein_coding gene_symbol:PBXIP1 description:PBX homeobox interacting protein 1 [Source:HGNC Symbol;Acc:HGNC:21199]	FALSE	TRUE	6.56635	4	9	4	High	High	High	High	Phospho [S43(100); S146(93.6); S147(93.6); S469(98.7); S709(100); S711(100)]	27.76
High	ENSP00000369757.4	pep chromosome:GRCh38:9:19375715:19380236:-1 gene:ENSG00000137154.13 transcript:ENST00000380394.9 gene_biotype:protein_coding transcript_biotype:protein_coding gene_symbol:RPS6 description:ribosomal protein S6 [Source:HGNC Symbol;Acc:HGNC:10429]	FALSE	TRUE	16.0643	7	19	7	High	High	High	High	Phospho [S235(100); S236(100); S240(92.9); S244(93.8); S247(93.8)]	23.89
High	ENSP00000351100.5	pep chromosome:GRCh38:5:140664676:140672345:1 gene:ENSG00000120314.18 transcript:ENST00000358337.9 gene_biotype:protein_coding transcript_biotype:protein_coding gene_symbol:WDR55 description:WD repeat domain 55 [Source:HGNC Symbol;Acc:HGNC:25971]	FALSE	TRUE	11.4883	2	7	2	High	High	High	High	Phospho [S14(100); S382(100)]	30.93
High	ENSP00000386862.1	pep chromosome:GRCh38:2:234978685:235055648:1 gene:ENSG00000130147.16 transcript:ENST00000409212.5 gene_biotype:protein_coding transcript_biotype:protein_coding gene_symbol:SH3BP4 description:SH3 domain binding protein 4 [Source:HGNC Symbol;Acc:HGNC:10826]	FALSE	TRUE	4.6729	3	17	3	High	High	High	High	Phospho [S131(100); S279(100)]	41.19
High	ENSP00000345808.2	pep chromosome:GRCh38:10:31805398:31928831:-1 gene:ENSG00000165322.18 transcript:ENST00000344936.7 gene_biotype:protein_coding transcript_biotype:protein_coding gene_symbol:ARHGAP12 description:Rho GTPase activating protein 12 [Source:HGNC Symbol;Acc:HGNC:16348]	FALSE	TRUE	7.91962	4	7	4	High	High	High	High	Phospho [S103(94.8); S201(98.7); S215(94.2)]	19.72
High	ENSP00000349541.4	pep chromosome:GRCh38:17:42402449:42423256:-1 gene:ENSG00000177469.13 transcript:ENST00000357037.6 gene_biotype:protein_coding transcript_biotype:protein_coding gene_symbol:CAVIN1 description:caveolae associated protein 1 [Source:HGNC Symbol;Acc:HGNC:9688]	FALSE	TRUE	16.9231	5	7	5	High	High	High	High	Phospho [S171(100); T302(91.9)]	20.2
High	ENSP00000279392.3	pep chromosome:GRCh38:16:29992330:29995617:-1 gene:ENSG00000149929.16 transcript:ENST00000279392.8 gene_biotype:protein_coding transcript_biotype:protein_coding gene_symbol:HIRIP3 description:HIRA interacting protein 3 [Source:HGNC Symbol;Acc:HGNC:4917]	FALSE	TRUE	10.7914	5	6	5	High	High	High	High	Phospho [S142(100); S143(100); S159(100); S160(100); S199(100); S227(100); S555(100)]	20.51
High	ENSP00000298310.5	pep chromosome:GRCh38:14:49782083:49852788:-1 gene:ENSG00000165525.18 transcript:ENST00000298310.10 gene_biotype:protein_coding transcript_biotype:protein_coding gene_symbol:NEMF description:nuclear export mediator factor [Source:HGNC Symbol;Acc:HGNC:10663]	FALSE	TRUE	4.83271	4	9	4	High	High	High	High	Phospho [S417(100); S748(92.3)]	34.14
High	ENSP00000412130.2	pep chromosome:GRCh38:11:10573095:10693752:-1 gene:ENSG00000072952.18 transcript:ENST00000423302.6 gene_biotype:protein_coding transcript_biotype:protein_coding gene_symbol:MRVI1 description:murine retrovirus integration site 1 homolog [Source:HGNC Symbol;Acc:HGNC:7237]	FALSE	TRUE	7.78509	4	8	4	High	High	High	High	Phospho [S194(100); S198(99.9); S347(86.8); S394(100); S489(100)]	25.34
High	ENSP00000366843.3	pep chromosome:GRCh38:12:111452268:111599676:-1 gene:ENSG00000204842.17 transcript:ENST00000377617.8 gene_biotype:protein_coding transcript_biotype:protein_coding gene_symbol:ATXN2 description:ataxin 2 [Source:HGNC Symbol;Acc:HGNC:10555]	FALSE	TRUE	5.71211	6	13	6	High	High	High	High	Phospho [S466(100); T672(92.9); T741(100); S758(100); S784(100); S889(99.1)]	20.34
High	ENSP00000317904.3	pep chromosome:GRCh38:19:48968130:48993309:-1 gene:ENSG00000104812.15 transcript:ENST00000323798.8 gene_biotype:protein_coding transcript_biotype:protein_coding gene_symbol:GYS1 description:glycogen synthase 1 [Source:HGNC Symbol;Acc:HGNC:4706]	FALSE	TRUE	3.52782	3	11	3	High	High	High	High	Phospho [S653(93.1); S657(100); S702(95.7)]	24.01
High	ENSP00000406266.2	pep chromosome:GRCh38:5:36876790:37064190:1 gene:ENSG00000164190.19 transcript:ENST00000448238.2 gene_biotype:protein_coding transcript_biotype:protein_coding gene_symbol:NIPBL description:NIPBL cohesin loading factor [Source:HGNC Symbol;Acc:HGNC:28862]	FALSE	TRUE	2.37301	5	6	5	High	High	High	High	Phospho [S892(93); S1090(91.6); S1096(100); S2658(100); S2672(100)]	20.44
High	ENSP00000379051.2	pep chromosome:GRCh38:7:44876299:44885530:-1 gene:ENSG00000146676.10 transcript:ENST00000395699.5 gene_biotype:protein_coding transcript_biotype:protein_coding gene_symbol:PURB description:purine rich element binding protein B [Source:HGNC Symbol;Acc:HGNC:9702]	FALSE	TRUE	6.08974	2	9	2	High	High	High	High	Phospho [S304(100)]	26.71
High	ENSP00000343054.3	pep chromosome:GRCh38:3:50088919:50119021:1 gene:ENSG00000003756.17 transcript:ENST00000347869.8 gene_biotype:protein_coding transcript_biotype:protein_coding gene_symbol:RBM5 description:RNA binding motif protein 5 [Source:HGNC Symbol;Acc:HGNC:9902]	FALSE	TRUE	6.13497	5	7	5	High	High	High	High	Phospho [S59(100); S78(99.4); S624(100)]	19.55
High	ENSP00000378338.3	pep chromosome:GRCh38:17:29573475:29589549:-1 gene:ENSG00000108262.15 transcript:ENST00000394869.7 gene_biotype:protein_coding transcript_biotype:protein_coding gene_symbol:GIT1 description:GIT ArfGAP 1 [Source:HGNC Symbol;Acc:HGNC:4272]	FALSE	TRUE	6.49351	2	7	2	High	High	High	High	Phospho [S397(98.8); S601(99.4)]	39.03
High	ENSP00000404854.2	pep chromosome:GRCh38:8:133237176:133297586:-1 gene:ENSG00000104419.14 transcript:ENST00000414097.6 gene_biotype:protein_coding transcript_biotype:protein_coding gene_symbol:NDRG1 description:N-myc downstream regulated 1 [Source:HGNC Symbol;Acc:HGNC:7679]	FALSE	TRUE	8.12183	3	10	3	High	High	High	High	Phospho [S333(94.5); T699(99.7); T699(99.7)]	27.24
High	ENSP00000351777.6	pep chromosome:GRCh38:9:35056064:35072625:-1 gene:ENSG00000165280.16 transcript:ENST00000358901.11 gene_biotype:protein_coding transcript_biotype:protein_coding gene_symbol:VCP description:valosin containing protein [Source:HGNC Symbol;Acc:HGNC:12666]	FALSE	TRUE	8.31266	3	8	3	High	High	High	High	Phospho [S775(100)]	44.62
High	ENSP00000364198.1	pep chromosome:GRCh38:X:54808371:54816007:1 gene:ENSG00000102316.17 transcript:ENST00000375058.5 gene_biotype:protein_coding transcript_biotype:protein_coding gene_symbol:MAGED2 description:MAGE family member D2 [Source:HGNC Symbol;Acc:HGNC:16353]	FALSE	TRUE	3.63036	1	12	1	High	High	High	High	Phospho [S191(99.6)]	44.28
High	ENSP00000264904.7	pep chromosome:GRCh38:4:75724598:75814286:1 gene:ENSG00000138768.14 transcript:ENST00000264904.8 gene_biotype:protein_coding transcript_biotype:protein_coding gene_symbol:USO1 description:USO1 vesicle transport factor [Source:HGNC Symbol;Acc:HGNC:30904]	FALSE	TRUE	3.6999	3	6	3	High	High	High	High	Phospho [S953(100)]	30.49
High	ENSP00000396673.2	pep chromosome:GRCh38:17:63819433:63827663:-1 gene:ENSG00000108592.17 transcript:ENST00000427159.7 gene_biotype:protein_coding transcript_biotype:protein_coding gene_symbol:FTSJ3 description:FtsJ RNA 2'-O-methyltransferase 3 [Source:HGNC Symbol;Acc:HGNC:17136]	FALSE	TRUE	2.95159	1	11	1	High	High	High	High	Phospho [S335(92.5); S336(99.9)]	22.26
High	ENSP00000338235.3	pep chromosome:GRCh38:8:97644184:97730260:1 gene:ENSG00000147649.10 transcript:ENST00000336273.8 gene_biotype:protein_coding transcript_biotype:protein_coding gene_symbol:MTDH description:metadherin [Source:HGNC Symbol;Acc:HGNC:29608]	FALSE	TRUE	9.27835	4	9	4	High	High	High	High	Phospho [S298(100); S426(100); S568(100)]	19.13
High	ENSP00000480549.1	pep chromosome:GRCh38:2:37641882:37672535:-1 gene:ENSG00000163171.7 transcript:ENST00000611976.1 gene_biotype:protein_coding transcript_biotype:protein_coding gene_symbol:CDC42EP3 description:CDC42 effector protein 3 [Source:HGNC Symbol;Acc:HGNC:16943]	FALSE	TRUE	12.2047	3	8	3	High	High	High	High	Phospho [S100(100); S144(100)]	23.35
High	ENSP00000245932.5	pep chromosome:GRCh38:19:45507479:45526983:1 gene:ENSG00000125753.14 transcript:ENST00000245932.11 gene_biotype:protein_coding transcript_biotype:protein_coding gene_symbol:VASP description:vasodilator stimulated phosphoprotein [Source:HGNC Symbol;Acc:HGNC:12652]	FALSE	TRUE	17.1053	5	11	5	High	High	High	High	Phospho [S239(100); T284(85.4); T335(99.4)]	26.7
High	ENSP00000356814.3	pep chromosome:GRCh38:1:167936818:168075834:1 gene:ENSG00000143164.15 transcript:ENST00000367840.3 gene_biotype:protein_coding transcript_biotype:protein_coding gene_symbol:DCAF6 description:DDB1 and CUL4 associated factor 6 [Source:HGNC Symbol;Acc:HGNC:30002]	FALSE	TRUE	5.88854	5	6	5	High	High	High	High	Phospho [S336(100); S938(100); S941(100)]	22
High	ENSP00000433548.3	pep chromosome:GRCh38:12:752923:911451:1 gene:ENSG00000060237.17 transcript:ENST00000530271.6 gene_biotype:protein_coding transcript_biotype:protein_coding gene_symbol:WNK1 description:WNK lysine deficient protein kinase 1 [Source:HGNC Symbol;Acc:HGNC:14540]	FALSE	TRUE	1.58842	4	9	4	High	High	High	High	Phospho [S2440(100); S2442(100); S2445(100); S2823(85)]	25.23
High	ENSP00000353508.4	pep chromosome:GRCh38:2:209579421:209734118:1 gene:ENSG00000078018.19 transcript:ENST00000360351.8 gene_biotype:protein_coding transcript_biotype:protein_coding gene_symbol:MAP2 description:microtubule associated protein 2 [Source:HGNC Symbol;Acc:HGNC:6839]	FALSE	TRUE	5.52819	5	11	5	High	High	High	High	Phospho [S654(83.7); S1347(100); S1353(100); T1605(99.2); S1782(99.8); S1790(100)]	20
High	ENSP00000268058.3	pep chromosome:GRCh38:15:73994716:74047827:1 gene:ENSG00000140464.20 transcript:ENST00000268058.8 gene_biotype:protein_coding transcript_biotype:protein_coding gene_symbol:PML description:promyelocytic leukemia [Source:HGNC Symbol;Acc:HGNC:9113]	FALSE	TRUE	6.9161	5	21	5	High	High	High	High	Phospho [S36(93.4); S403(100); S505(91.4); S518(100); S527(100)]	30.21
High	ENSP00000356265.4	pep chromosome:GRCh38:1:201648249:201826969:1 gene:ENSG00000134369.15 transcript:ENST00000367296.8 gene_biotype:protein_coding transcript_biotype:protein_coding gene_symbol:NAV1 description:neuron navigator 1 [Source:HGNC Symbol;Acc:HGNC:15989]	FALSE	TRUE	2.82365	3	8	3	High	High	High	High	Phospho [S199(99.9); S1253(93.8)]	27
High	ENSP00000348933.4	pep chromosome:GRCh38:8:27733316:27772640:-1 gene:ENSG00000147419.18 transcript:ENST00000356537.9 gene_biotype:protein_coding transcript_biotype:protein_coding gene_symbol:CCDC25 description:coiled-coil domain containing 25 [Source:HGNC Symbol;Acc:HGNC:25591]	FALSE	TRUE	8.17308	1	6	1	High	High	High	High	Phospho [S204(100)]	27.65
High	ENSP00000366852.2	pep chromosome:GRCh38:13:75284665:75482114:-1 gene:ENSG00000136111.14 transcript:ENST00000377625.6 gene_biotype:protein_coding transcript_biotype:protein_coding gene_symbol:TBC1D4 description:TBC1 domain family member 4 [Source:HGNC Symbol;Acc:HGNC:19165]	FALSE	TRUE	4.37247	4	7	4	High	High	High	High	Phospho [S588(100); S673(94.1); S678(100); S688(78.4); S691(88.4)]	15.84
High	ENSP00000356257.4	pep chromosome:GRCh38:1:201896456:201946548:-1 gene:ENSG00000163431.13 transcript:ENST00000367288.5 gene_biotype:protein_coding transcript_biotype:protein_coding gene_symbol:LMOD1 description:leiomodin 1 [Source:HGNC Symbol;Acc:HGNC:6647]	FALSE	TRUE	6.5	4	15	4	High	High	High	High	Phospho [S85(100); S119(100); S133(93.3); S555(100)]	17.69
High	ENSP00000498803.1	pep chromosome:GRCh38:19:10553085:10566026:-1 gene:ENSG00000129347.21 transcript:ENST00000652042.1 gene_biotype:protein_coding transcript_biotype:protein_coding gene_symbol:KRI1 description:KRI1 homolog [Source:HGNC Symbol;Acc:HGNC:25769]	FALSE	TRUE	7.47532	3	9	3	High	High	High	High	Phospho [S103(99); S142(100); S177(100)]	28.42
High	ENSP00000356607.3	pep chromosome:GRCh38:1:178725165:178920103:1 gene:ENSG00000116191.17 transcript:ENST00000367635.7 gene_biotype:protein_coding transcript_biotype:protein_coding gene_symbol:RALGPS2 description:Ral GEF with PH domain and SH3 binding motif 2 [Source:HGNC Symbol;Acc:HGNC:30279]	FALSE	TRUE	8.23328	4	8	4	High	High	High	High	Phospho [S296(99.5); S329(99.3); T361(99.2)]	19.05
High	ENSP00000375857.4	pep chromosome:GRCh38:2:237692339:237764961:1 gene:ENSG00000124831.19 transcript:ENST00000392000.4 gene_biotype:protein_coding transcript_biotype:protein_coding gene_symbol:LRRFIP1 description:LRR binding FLII interacting protein 1 [Source:HGNC Symbol;Acc:HGNC:6702]	FALSE	TRUE	7.92079	4	8	4	High	High	High	High	Phospho [S66(99.6); S68(100); S733(99.9); S768(99.6)]	19.12
High	ENSP00000339299.4	pep chromosome:GRCh38:5:14143342:14510204:1 gene:ENSG00000038382.20 transcript:ENST00000344204.9 gene_biotype:protein_coding transcript_biotype:protein_coding gene_symbol:TRIO description:trio Rho guanine nucleotide exchange factor [Source:HGNC Symbol;Acc:HGNC:12303]	FALSE	TRUE	1.87278	4	16	4	High	High	High	High	Phospho [S1724(96.3); S2455(93.2); S2477(99.7)]	25.87
High	ENSP00000225298.7	pep chromosome:GRCh38:17:51260546:51297933:1 gene:ENSG00000011260.14 transcript:ENST00000225298.12 gene_biotype:protein_coding transcript_biotype:protein_coding gene_symbol:UTP18 description:UTP18 small subunit processome component [Source:HGNC Symbol;Acc:HGNC:24274]	FALSE	TRUE	6.29496	3	6	3	High	High	High	High	Phospho [S121(100); S124(100); S205(94.6); S206(100); S210(100)]	22.97
High	ENSP00000348050.2	pep chromosome:GRCh38:17:76672551:76710955:-1 gene:ENSG00000182534.13 transcript:ENST00000355797.7 gene_biotype:protein_coding transcript_biotype:protein_coding gene_symbol:MXRA7 description:matrix remodeling associated 7 [Source:HGNC Symbol;Acc:HGNC:7541]	FALSE	TRUE	28.4314	5	8	1	High	High	High	High	Phospho [S128(100); S144(98); S191(100)]	18.12
High	ENSP00000423427.2	pep chromosome:GRCh38:6:18224346:18264524:-1 gene:ENSG00000124795.17 transcript:ENST00000507591.2 gene_biotype:protein_coding transcript_biotype:protein_coding gene_symbol:DEK description:DEK proto-oncogene [Source:HGNC Symbol;Acc:HGNC:2768]	FALSE	TRUE	16.8421	4	6	4	High	High	High	High	Phospho [S32(100); S243(100); S244(100); S251(100); S303(99.6); S306(100); S307(100)]	19.04
High	ENSP00000452796.2	pep chromosome:GRCh38:15:77100656:77420144:-1 gene:ENSG00000173517.10 transcript:ENST00000560626.6 gene_biotype:protein_coding transcript_biotype:protein_coding gene_symbol:PEAK1 description:pseudopodium enriched atypical kinase 1 [Source:HGNC Symbol;Acc:HGNC:29431]	FALSE	TRUE	4.41008	7	10	7	High	High	High	High	Phospho [T571(87.3); S1036(87.8); T1151(100); S1217(99.8)]	18.86
High	ENSP00000253024.4	pep chromosome:GRCh38:19:58544064:58550715:1 gene:ENSG00000130726.12 transcript:ENST00000253024.10 gene_biotype:protein_coding transcript_biotype:protein_coding gene_symbol:TRIM28 description:tripartite motif containing 28 [Source:HGNC Symbol;Acc:HGNC:16384]	FALSE	TRUE	10.2994	3	14	3	High	High	High	High	Phospho [S50(97.6); S473(100)]	24.31
High	ENSP00000471865.1	pep chromosome:GRCh38:19:4047742:4065732:-1 gene:ENSG00000178951.9 transcript:ENST00000601588.1 gene_biotype:protein_coding transcript_biotype:protein_coding gene_symbol:ZBTB7A description:zinc finger and BTB domain containing 7A [Source:HGNC Symbol;Acc:HGNC:18078]	FALSE	TRUE	10.6164	4	10	4	High	High	High	High	Phospho [S337(100); S526(90.9); S549(100)]	30.08
High	ENSP00000318861.6	pep chromosome:GRCh38:11:66052364:66069308:1 gene:ENSG00000087365.16 transcript:ENST00000322535.11 gene_biotype:protein_coding transcript_biotype:protein_coding gene_symbol:SF3B2 description:splicing factor 3b subunit 2 [Source:HGNC Symbol;Acc:HGNC:10769]	FALSE	TRUE	5.02793	3	7	3	High	High	High	High	Phospho [S431(100); S435(100); S436(100)]	24.23
High	ENSP00000338191.4	pep chromosome:GRCh38:16:69187129:69309052:1 gene:ENSG00000168807.16 transcript:ENST00000336278.8 gene_biotype:protein_coding transcript_biotype:protein_coding gene_symbol:SNTB2 description:syntrophin beta 2 [Source:HGNC Symbol;Acc:HGNC:11169]	FALSE	TRUE	10.1852	3	10	3	High	High	High	High	Phospho [S95(100); S110(100)]	17.69
High	ENSP00000263650.7	pep chromosome:GRCh38:11:3087107:3165310:-1 gene:ENSG00000021762.20 transcript:ENST00000263650.12 gene_biotype:protein_coding transcript_biotype:protein_coding gene_symbol:OSBPL5 description:oxysterol binding protein like 5 [Source:HGNC Symbol;Acc:HGNC:16392]	FALSE	TRUE	5.34699	4	7	4	High	High	High	High	Phospho [T64(92.7); S312(100); S325(97.8); S327(99.6); S330(87.5)]	18.29
High	ENSP00000391249.1	pep chromosome:GRCh38:17:77281499:77500593:1 gene:ENSG00000184640.18 transcript:ENST00000427177.6 gene_biotype:protein_coding transcript_biotype:protein_coding gene_symbol:SEPTIN9 description:septin 9 [Source:HGNC Symbol;Acc:HGNC:7323]	FALSE	TRUE	6.48464	5	9	5	High	High	High	High	Phospho [S30(100); S327(100)]	20.71
High	ENSP00000271277.6	pep chromosome:GRCh38:1:112396214:112461164:1 gene:ENSG00000143079.15 transcript:ENST00000271277.11 gene_biotype:protein_coding transcript_biotype:protein_coding gene_symbol:CTTNBP2NL description:CTTNBP2 N-terminal like [Source:HGNC Symbol;Acc:HGNC:25330]	FALSE	TRUE	9.85915	5	8	5	High	High	High	High	Phospho [S481(99.4); S488(100); S549(100); S568(99)]	20.16
High	ENSP00000486116.1	pep chromosome:GRCh38:2:101698026:101894689:1 gene:ENSG00000071054.16 transcript:ENST00000625522.2 gene_biotype:protein_coding transcript_biotype:protein_coding gene_symbol:MAP4K4 description:mitogen-activated protein kinase kinase kinase kinase 4 [Source:HGNC Symbol;Acc:HGNC:6866]	FALSE	TRUE	4.54545	6	17	6	High	High	High	High	Phospho [T576(95.3); T705(92.3); S706(92.9); S716(100); S733(99.8); S788(79.3); S793(99.4)]	21.23
High	ENSP00000348278.4	pep chromosome:GRCh38:2:167954022:168247595:-1 gene:ENSG00000198648.11 transcript:ENST00000355999.5 gene_biotype:protein_coding transcript_biotype:protein_coding gene_symbol:STK39 description:serine/threonine kinase 39 [Source:HGNC Symbol;Acc:HGNC:17717]	FALSE	TRUE	5.87156	3	10	3	High	High	High	High	Phospho [S385(100)]	28.67
High	ENSP00000441750.1	pep chromosome:GRCh38:12:56158362:56160795:1 gene:ENSG00000092841.18 transcript:ENST00000536128.5 gene_biotype:protein_coding transcript_biotype:protein_coding gene_symbol:MYL6 description:myosin light chain 6 [Source:HGNC Symbol;Acc:HGNC:7587]	FALSE	TRUE	21.0084	5	5	5	High	High	High	High	Phospho [S150(100)]	14.67
High	ENSP00000450832.1	pep chromosome:GRCh38:14:71529325:71741229:1 gene:ENSG00000197555.9 transcript:ENST00000555818.5 gene_biotype:protein_coding transcript_biotype:protein_coding gene_symbol:SIPA1L1 description:signal induced proliferation associated 1 like 1 [Source:HGNC Symbol;Acc:HGNC:20284]	FALSE	TRUE	4.32373	7	12	7	High	High	High	High	Phospho [S208(94); S288(77.1); S311(92.6); S1181(100); S1549(92.4); S1585(100); S1632(91.4)]	18.01
High	ENSP00000499521.1	pep chromosome:GRCh38:17:7484379:7514618:1 gene:ENSG00000181222.16 transcript:ENST00000653680.1 gene_biotype:protein_coding transcript_biotype:protein_coding gene_symbol:POLR2A description:RNA polymerase II subunit A [Source:HGNC Symbol;Acc:HGNC:9187]	FALSE	TRUE	5.98985	5	15	5	High	High	High	High	Phospho [Y1874(100); S1906(89.4)]	24.17
High	ENSP00000366179.3	pep chromosome:GRCh38:10:21756548:22003730:-1 gene:ENSG00000136770.11 transcript:ENST00000376980.8 gene_biotype:protein_coding transcript_biotype:protein_coding gene_symbol:DNAJC1 description:DnaJ heat shock protein family (Hsp40) member C1 [Source:HGNC Symbol;Acc:HGNC:20090]	FALSE	TRUE	8.84477	4	5	4	High	High	High	High	Phospho [S430(100); S479(100); S480(100)]	20.93
High	ENSP00000250617.6	pep chromosome:GRCh38:X:136665550:136780932:-1 gene:ENSG00000129675.16 transcript:ENST00000250617.7 gene_biotype:protein_coding transcript_biotype:protein_coding gene_symbol:ARHGEF6 description:Rac/Cdc42 guanine nucleotide exchange factor 6 [Source:HGNC Symbol;Acc:HGNC:685]	FALSE	TRUE	4.76804	4	5	1	High	High	High	High	Phospho [S488(100); S649(97); S684(100)]	16.03
High	ENSP00000237596.2	pep chromosome:GRCh38:4:88007635:88077777:1 gene:ENSG00000118762.8 transcript:ENST00000237596.7 gene_biotype:protein_coding transcript_biotype:protein_coding gene_symbol:PKD2 description:polycystin 2, transient receptor potential cation channel [Source:HGNC Symbol;Acc:HGNC:9009]	FALSE	TRUE	3.92562	3	6	3	High	High	High	High	Phospho [S166(100); S812(100)]	27.28
High	ENSP00000351410.1	pep chromosome:GRCh38:17:68512032:68532762:1 gene:ENSG00000108946.14 transcript:ENST00000358598.6 gene_biotype:protein_coding transcript_biotype:protein_coding gene_symbol:PRKAR1A description:protein kinase cAMP-dependent type I regulatory subunit alpha [Source:HGNC Symbol;Acc:HGNC:9388]	FALSE	TRUE	4.72441	2	6	2	High	High	High	High	Phospho [S77(100); S83(100)]	21.89
High	ENSP00000283109.3	pep chromosome:GRCh38:5:97160867:97183247:-1 gene:ENSG00000058729.11 transcript:ENST00000283109.8 gene_biotype:protein_coding transcript_biotype:protein_coding gene_symbol:RIOK2 description:RIO kinase 2 [Source:HGNC Symbol;Acc:HGNC:18999]	FALSE	TRUE	8.69565	3	10	3	High	High	High	High	Phospho [S337(99.8); S350(100); S380(89.2)]	24.52
High	ENSP00000422626.1	pep chromosome:GRCh38:4:112637126:112657586:1 gene:ENSG00000174720.16 transcript:ENST00000509061.5 gene_biotype:protein_coding transcript_biotype:protein_coding gene_symbol:LARP7 description:La ribonucleoprotein domain family member 7 [Source:HGNC Symbol;Acc:HGNC:24912]	FALSE	TRUE	7.64007	3	10	3	High	High	High	High	Phospho [T264(100); S265(100); S305(94.2); S344(100); T345(100)]	26.57
High	ENSP00000379983.2	pep chromosome:GRCh38:2:219219380:219229717:-1 gene:ENSG00000198925.12 transcript:ENST00000396761.6 gene_biotype:protein_coding transcript_biotype:protein_coding gene_symbol:ATG9A description:autophagy related 9A [Source:HGNC Symbol;Acc:HGNC:22408]	FALSE	TRUE	4.64839	2	6	2	High	High	High	High	Phospho [S735(100); S738(100); S828(100)]	22.5
High	ENSP00000362409.3	pep chromosome:GRCh38:9:127505343:127569073:-1 gene:ENSG00000136830.12 transcript:ENST00000373312.4 gene_biotype:protein_coding transcript_biotype:protein_coding gene_symbol:NIBAN2 description:niban apoptosis regulator 2 [Source:HGNC Symbol;Acc:HGNC:25282]	FALSE	TRUE	7.5067	3	12	3	High	High	High	High	Phospho [S646(89.7); S692(92.5)]	21.81
High	ENSP00000228136.4	pep chromosome:GRCh38:11:16738647:16758340:1 gene:ENSG00000110696.10 transcript:ENST00000228136.9 gene_biotype:protein_coding transcript_biotype:protein_coding gene_symbol:C11orf58 description:chromosome 11 open reading frame 58 [Source:HGNC Symbol;Acc:HGNC:16990]	FALSE	TRUE	12.5683	1	11	1	High	High	High	High	Phospho [S17(94.1)]	42.75
High	ENSP00000261173.2	pep chromosome:GRCh38:12:89588051:89656067:-1 gene:ENSG00000070961.15 transcript:ENST00000261173.6 gene_biotype:protein_coding transcript_biotype:protein_coding gene_symbol:ATP2B1 description:ATPase plasma membrane Ca2+ transporting 1 [Source:HGNC Symbol;Acc:HGNC:814]	FALSE	TRUE	2.78689	3	6	3	High	High	High	High	Phospho [S1155(100); S1177(100); S1178(100); S1182(100)]	20.83
High	ENSP00000432047.1	pep chromosome:GRCh38:11:6319144:6320532:-1 gene:ENSG00000170955.10 transcript:ENST00000530979.1 gene_biotype:protein_coding transcript_biotype:protein_coding gene_symbol:CAVIN3 description:caveolae associated protein 3 [Source:HGNC Symbol;Acc:HGNC:9400]	FALSE	TRUE	15.0171	2	15	2	High	High	High	High	Phospho [S62(100); S197(100); S198(100)]	67.81
High	ENSP00000328720.4	pep chromosome:GRCh38:7:4682295:4771442:1 gene:ENSG00000164916.11 transcript:ENST00000328914.5 gene_biotype:protein_coding transcript_biotype:protein_coding gene_symbol:FOXK1 description:forkhead box K1 [Source:HGNC Symbol;Acc:HGNC:23480]	FALSE	TRUE	9.41337	5	12	4	High	High	High	High	Phospho [S101(100); S213(100); T436(100); S445(100)]	24.11
High	ENSP00000490391.1	pep chromosome:GRCh38:13:98143416:98407494:1 gene:ENSG00000152767.17 transcript:ENST00000596580.2 gene_biotype:protein_coding transcript_biotype:protein_coding gene_symbol:FARP1 description:FERM, ARH/RhoGEF and pleckstrin domain protein 1 [Source:HGNC Symbol;Acc:HGNC:3591]	FALSE	TRUE	6.74157	4	8	1	High	High	High	High	Phospho [T24(94.4); S427(100); S433(100); S635(98.6)]	21.48
High	ENSP00000327077.8	pep chromosome:GRCh38:8:17922840:18027968:1 gene:ENSG00000078674.17 transcript:ENST00000325083.12 gene_biotype:protein_coding transcript_biotype:protein_coding gene_symbol:PCM1 description:pericentriolar material 1 [Source:HGNC Symbol;Acc:HGNC:8727]	FALSE	TRUE	3.90316	4	8	4	High	High	High	High	Phospho [S65(100); S872(100); S1765(100); S1768(100)]	21.74
High	ENSP00000481886.1	pep chromosome:GRCh38:4:128269237:128288822:-1 gene:ENSG00000164040.18 transcript:ENST00000613358.4 gene_biotype:protein_coding transcript_biotype:protein_coding gene_symbol:PGRMC2 description:progesterone receptor membrane component 2 [Source:HGNC Symbol;Acc:HGNC:16089]	FALSE	TRUE	17.4089	4	32	4	High	High	High	High	Phospho [S114(99.2); T235(95.1)]	59.64
High	ENSP00000298767.4	pep chromosome:GRCh38:10:86435256:86521792:-1 gene:ENSG00000062650.19 transcript:ENST00000298767.10 gene_biotype:protein_coding transcript_biotype:protein_coding gene_symbol:WAPL description:WAPL cohesin release factor [Source:HGNC Symbol;Acc:HGNC:23293]	FALSE	TRUE	4.87395	3	6	3	High	High	High	High	Phospho [S77(100); S221(100); S459(100); S461(100)]	30.17
High	ENSP00000417763.1	pep chromosome:GRCh38:X:153929225:153935037:-1 gene:ENSG00000102030.16 transcript:ENST00000464845.6 gene_biotype:protein_coding transcript_biotype:protein_coding gene_symbol:NAA10 description:N(alpha)-acetyltransferase 10, NatA catalytic subunit [Source:HGNC Symbol;Acc:HGNC:18704]	FALSE	TRUE	22.5532	5	8	5	High	High	High	High	Phospho [S182(99.9); S189(82.4); S205(100); S228(99.6)]	22.07
High	ENSP00000363014.2	pep chromosome:GRCh38:20:36367149:36527190:1 gene:ENSG00000080845.17 transcript:ENST00000373907.6 gene_biotype:protein_coding transcript_biotype:protein_coding gene_symbol:DLGAP4 description:DLG associated protein 4 [Source:HGNC Symbol;Acc:HGNC:24476]	FALSE	TRUE	5.44355	4	8	4	High	High	High	High	Phospho [S716(100)]	24.52
High	ENSP00000299633.4	pep chromosome:GRCh38:15:83127753:83207823:-1 gene:ENSG00000166503.9 transcript:ENST00000299633.7 gene_biotype:protein_coding transcript_biotype:protein_coding gene_symbol:HDGFL3 description:HDGF like 3 [Source:HGNC Symbol;Acc:HGNC:24937]	FALSE	TRUE	28.0788	3	8	3	High	High	High	High	Phospho [S121(100); S122(100); S178(89.2)]	20.8
High	ENSP00000479964.1	pep chromosome:GRCh38:2:27663471:27694976:1 gene:ENSG00000163798.13 transcript:ENST00000613058.4 gene_biotype:protein_coding transcript_biotype:protein_coding gene_symbol:SLC4A1AP description:solute carrier family 4 member 1 adaptor protein [Source:HGNC Symbol;Acc:HGNC:13813]	FALSE	TRUE	4.52261	3	4	3	High	High	High	High	Phospho [S312(100); S466(99.1)]	17.94
High	ENSP00000454545.1	pep chromosome:GRCh38:3:51391285:51397908:1 gene:ENSG00000259956.2 transcript:ENST00000563281.2 gene_biotype:protein_coding transcript_biotype:protein_coding gene_symbol:RBM15B description:RNA binding motif protein 15B [Source:HGNC Symbol;Acc:HGNC:24303]	FALSE	TRUE	7.64045	5	7	5	High	High	High	High	Phospho [S109(100); S113(100); T532(100); S598(93.3); S601(93.3); S609(93.5)]	15.98
High	ENSP00000314499.4	pep chromosome:GRCh38:4:849277:932316:-1 gene:ENSG00000178950.17 transcript:ENST00000314167.9 gene_biotype:protein_coding transcript_biotype:protein_coding gene_symbol:GAK description:cyclin G associated kinase [Source:HGNC Symbol;Acc:HGNC:4113]	FALSE	TRUE	4.95805	2	6	2	High	High	High	High	Phospho [S778(89.6); S829(99.3)]	18.13
High	ENSP00000489867.2	pep chromosome:GRCh38:20:36154740:36232799:1 gene:ENSG00000088367.23 transcript:ENST00000636016.2 gene_biotype:protein_coding transcript_biotype:protein_coding gene_symbol:EPB41L1 description:erythrocyte membrane protein band 4.1 like 1 [Source:HGNC Symbol;Acc:HGNC:3378]	FALSE	TRUE	3.94984	5	9	5	High	High	High	High	Phospho [S461(100); S466(100); S1293(100); T1367(87.3); S1498(99.2); S1584(100)]	24.9
High	ENSP00000219476.3	pep chromosome:GRCh38:16:2047985:2089491:1 gene:ENSG00000103197.18 transcript:ENST00000219476.9 gene_biotype:protein_coding transcript_biotype:protein_coding gene_symbol:TSC2 description:TSC complex subunit 2 [Source:HGNC Symbol;Acc:HGNC:12363]	FALSE	TRUE	3.04372	4	12	4	High	High	High	High	Phospho [S1338(100); S1341(95.8); S1411(100); S1449(79.8)]	19.47
High	ENSP00000276297.4	pep chromosome:GRCh38:8:13083361:13514851:-1 gene:ENSG00000164741.15 transcript:ENST00000276297.9 gene_biotype:protein_coding transcript_biotype:protein_coding gene_symbol:DLC1 description:DLC1 Rho GTPase activating protein [Source:HGNC Symbol;Acc:HGNC:2897]	FALSE	TRUE	3.07592	6	13	6	High	High	High	High	Phospho [S526(100); S868(94.4); S986(97.5)]	17.51
High	ENSP00000329419.4	pep chromosome:GRCh38:3:139357406:139389647:-1 gene:ENSG00000184432.10 transcript:ENST00000333188.10 gene_biotype:protein_coding transcript_biotype:protein_coding gene_symbol:COPB2 description:coatomer protein complex subunit beta 2 [Source:HGNC Symbol;Acc:HGNC:2232]	FALSE	TRUE	3.20088	2	7	2	High	High	High	High	Phospho [S859(99.8)]	22.46
High	ENSP00000383866.4	pep chromosome:GRCh38:1:16367242:16398145:1 gene:ENSG00000055070.17 transcript:ENST00000401088.9 gene_biotype:protein_coding transcript_biotype:protein_coding gene_symbol:SZRD1 description:SUZ RNA binding domain containing 1 [Source:HGNC Symbol;Acc:HGNC:30232]	FALSE	TRUE	30.2632	3	7	3	High	High	High	High	Phospho [S39(92.1); S105(95.8)]	12.84
High	ENSP00000349291.3	pep chromosome:GRCh38:5:179862066:179907859:-1 gene:ENSG00000197226.12 transcript:ENST00000356834.7 gene_biotype:protein_coding transcript_biotype:protein_coding gene_symbol:TBC1D9B description:TBC1 domain family member 9B [Source:HGNC Symbol;Acc:HGNC:29097]	FALSE	TRUE	4.4	4	7	4	High	High	High	High	Phospho [S435(98.1); S994(91.1); S1238(89.9); S1241(98.8)]	17.12
High	ENSP00000464036.2	pep chromosome:GRCh38:1:1635587:1659012:-1 gene:ENSG00000248333.8 transcript:ENST00000407249.7 gene_biotype:protein_coding transcript_biotype:protein_coding gene_symbol:CDK11B description:cyclin dependent kinase 11B [Source:HGNC Symbol;Acc:HGNC:1729]	FALSE	TRUE	7.92453	6	11	6	High	High	High	High	Phospho [S47(100); S115(100); S283(100); S589(100)]	15.39
High	ENSP00000370589.3	pep chromosome:GRCh38:20:2652632:2658393:1 gene:ENSG00000101361.17 transcript:ENST00000329276.10 gene_biotype:protein_coding transcript_biotype:protein_coding gene_symbol:NOP56 description:NOP56 ribonucleoprotein [Source:HGNC Symbol;Acc:HGNC:15911]	FALSE	TRUE	6.06061	3	10	3	High	High	High	High	Phospho [S520(84.7); S570(94.1)]	26.84
High	ENSP00000295770.2	pep chromosome:GRCh38:3:31532925:31637616:1 gene:ENSG00000163527.10 transcript:ENST00000295770.4 gene_biotype:protein_coding transcript_biotype:protein_coding gene_symbol:STT3B description:STT3 oligosaccharyltransferase complex catalytic subunit B [Source:HGNC Symbol;Acc:HGNC:30611]	FALSE	TRUE	1.93705	2	13	2	High	High	High	High	Phospho [S498(100); S499(100)]	38.7
High	ENSP00000342026.5	pep chromosome:GRCh38:1:173477335:173488815:1 gene:ENSG00000117592.9 transcript:ENST00000340385.6 gene_biotype:protein_coding transcript_biotype:protein_coding gene_symbol:PRDX6 description:peroxiredoxin 6 [Source:HGNC Symbol;Acc:HGNC:16753]	FALSE	TRUE	20.0893	4	6	4	High	High	High	High	Phospho [T44(98.5)]	13.3
High	ENSP00000248594.6	pep chromosome:GRCh38:7:77537295:77640069:1 gene:ENSG00000127947.16 transcript:ENST00000248594.11 gene_biotype:protein_coding transcript_biotype:protein_coding gene_symbol:PTPN12 description:protein tyrosine phosphatase non-receptor type 12 [Source:HGNC Symbol;Acc:HGNC:9645]	FALSE	TRUE	7.82051	4	8	4	High	High	High	High	Phospho [S435(100); T509(97.8); S603(99.6); S606(99.6); S673(100)]	21.16
High	ENSP00000253048.4	pep chromosome:GRCh38:19:47064187:47113776:-1 gene:ENSG00000130749.10 transcript:ENST00000253048.10 gene_biotype:protein_coding transcript_biotype:protein_coding gene_symbol:ZC3H4 description:zinc finger CCCH-type containing 4 [Source:HGNC Symbol;Acc:HGNC:17808]	FALSE	TRUE	5.75595	5	7	5	High	High	High	High	Phospho [S92(100); S94(100); S146(98.9); S808(79.4); S1269(100); S1275(100)]	19.44
High	ENSP00000326706.4	pep chromosome:GRCh38:15:64841915:64868002:1 gene:ENSG00000241839.10 transcript:ENST00000323544.5 gene_biotype:protein_coding transcript_biotype:protein_coding gene_symbol:PLEKHO2 description:pleckstrin homology domain containing O2 [Source:HGNC Symbol;Acc:HGNC:30026]	FALSE	TRUE	13.0612	3	14	3	High	High	High	High	Phospho [T232(85.2); T311(100)]	29.39
High	ENSP00000296215.5	pep chromosome:GRCh38:1:37534449:37554293:-1 gene:ENSG00000163877.11 transcript:ENST00000296215.8 gene_biotype:protein_coding transcript_biotype:protein_coding gene_symbol:SNIP1 description:Smad nuclear interacting protein 1 [Source:HGNC Symbol;Acc:HGNC:30587]	FALSE	TRUE	11.8687	5	8	5	High	High	High	High	Phospho [S35(100); S52(97.7); T57(78.5); S394(95.2)]	16.4
High	ENSP00000297071.4	pep chromosome:GRCh38:7:23504780:23531981:-1 gene:ENSG00000164548.11 transcript:ENST00000297071.9 gene_biotype:protein_coding transcript_biotype:protein_coding gene_symbol:TRA2A description:transformer 2 alpha homolog [Source:HGNC Symbol;Acc:HGNC:16645]	FALSE	TRUE	12.4113	7	19	3	High	High	High	High	Phospho [S20(92.8); T24(92.8); S96(100); S98(100); S100(100); S260(99.9); S262(92.5); S276(96.2)]	30.98
High	ENSP00000338727.4	pep chromosome:GRCh38:3:37052626:37174582:-1 gene:ENSG00000093167.18 transcript:ENST00000336686.9 gene_biotype:protein_coding transcript_biotype:protein_coding gene_symbol:LRRFIP2 description:LRR binding FLII interacting protein 2 [Source:HGNC Symbol;Acc:HGNC:6703]	FALSE	TRUE	4.85437	3	11	3	High	High	High	High	Phospho [S320(86)]	21.87
High	ENSP00000359042.4	pep chromosome:GRCh38:1:108692310:108702928:1 gene:ENSG00000134186.12 transcript:ENST00000370025.9 gene_biotype:protein_coding transcript_biotype:protein_coding gene_symbol:PRPF38B description:pre-mRNA processing factor 38B [Source:HGNC Symbol;Acc:HGNC:25512]	FALSE	TRUE	6.04396	5	10	4	High	High	High	High	Phospho [S260(100); S262(100); S266(100); S268(100); S527(99.8)]	20.79
High	ENSP00000393313.1	pep chromosome:GRCh38:19:16355247:16471970:-1 gene:ENSG00000127527.14 transcript:ENST00000455140.7 gene_biotype:protein_coding transcript_biotype:protein_coding gene_symbol:EPS15L1 description:epidermal growth factor receptor pathway substrate 15 like 1 [Source:HGNC Symbol;Acc:HGNC:24634]	FALSE	TRUE	9.34066	5	9	5	High	High	High	High	Phospho [S229(100); S372(87.6); S593(100); T797(83.2)]	21.13
High	ENSP00000422319.1	pep chromosome:GRCh38:5:139274104:139330428:1 gene:ENSG00000280987.4 transcript:ENST00000502929.5 gene_biotype:protein_coding transcript_biotype:protein_coding gene_symbol:MATR3 description:matrin 3 [Source:NCBI gene;Acc:9782]	FALSE	TRUE	6.70391	7	11	7	High	High	High	High	Phospho [S188(89.9); S596(75.1); Y597(75.1); S814(95.4)]	20.31
High	ENSP00000357053.1	pep chromosome:GRCh38:1:160215715:160262501:-1 gene:ENSG00000132716.18 transcript:ENST00000368074.5 gene_biotype:protein_coding transcript_biotype:protein_coding gene_symbol:DCAF8 description:DDB1 and CUL4 associated factor 8 [Source:HGNC Symbol;Acc:HGNC:24891]	FALSE	TRUE	5.52764	3	11	3	High	High	High	High	Phospho [S99(100); S129(100); S130(100)]	35.65
High	ENSP00000303482.3	pep chromosome:GRCh38:8:22138020:22141907:-1 gene:ENSG00000168476.12 transcript:ENST00000306306.8 gene_biotype:protein_coding transcript_biotype:protein_coding gene_symbol:REEP4 description:receptor accessory protein 4 [Source:HGNC Symbol;Acc:HGNC:26176]	FALSE	TRUE	11.6732	2	15	2	High	High	High	High	Phospho [S194(92.3); T204(92.3); S257(100)]	31.73
High	ENSP00000391466.1	pep chromosome:GRCh38:17:76679569:76711016:-1 gene:ENSG00000182534.13 transcript:ENST00000449428.6 gene_biotype:protein_coding transcript_biotype:protein_coding gene_symbol:MXRA7 description:matrix remodeling associated 7 [Source:HGNC Symbol;Acc:HGNC:7541]	FALSE	TRUE	26.4706	5	8	1	High	High	High	High	Phospho [S128(100); S144(98)]	17.19
High	ENSP00000255194.6	pep chromosome:GRCh38:5:78000525:78294755:-1 gene:ENSG00000132842.13 transcript:ENST00000255194.10 gene_biotype:protein_coding transcript_biotype:protein_coding gene_symbol:AP3B1 description:adaptor related protein complex 3 subunit beta 1 [Source:HGNC Symbol;Acc:HGNC:566]	FALSE	TRUE	2.3766	4	8	4	High	High	High	High	Phospho [S276(96.9); S750(100); S752(100)]	13.87
High	ENSP00000346196.2	pep chromosome:GRCh38:21:42893309:42913299:1 gene:ENSG00000160194.18 transcript:ENST00000354250.7 gene_biotype:protein_coding transcript_biotype:protein_coding gene_symbol:NDUFV3 description:NADH:ubiquinone oxidoreductase subunit V3 [Source:HGNC Symbol;Acc:HGNC:7719]	FALSE	TRUE	8.87949	2	5	2	High	High	High	High	Phospho [S162(100); S164(100)]	20.41
High	ENSP00000365625.3	pep chromosome:GRCh38:6:30653127:30673006:-1 gene:ENSG00000204560.10 transcript:ENST00000376442.8 gene_biotype:protein_coding transcript_biotype:protein_coding gene_symbol:DHX16 description:DEAH-box helicase 16 [Source:HGNC Symbol;Acc:HGNC:2739]	FALSE	TRUE	2.78578	2	8	2	High	High	High	High	Phospho [S103(99.9); S160(100)]	30.55
High	ENSP00000494972.1	pep chromosome:GRCh38:19:2100996:2129121:-1 gene:ENSG00000065000.18 transcript:ENST00000644728.1 gene_biotype:protein_coding transcript_biotype:protein_coding gene_symbol:AP3D1 description:adaptor related protein complex 3 subunit delta 1 [Source:HGNC Symbol;Acc:HGNC:568]	FALSE	TRUE	9.20635	4	7	4	High	High	High	High	Phospho [S400(100); T568(84.2); T620(75); S661(100)]	15.6
High	ENSP00000482645.1	pep chromosome:GRCh38:14:29576479:29927512:-1 gene:ENSG00000184304.15 transcript:ENST00000616995.4 gene_biotype:protein_coding transcript_biotype:protein_coding gene_symbol:PRKD1 description:protein kinase D1 [Source:HGNC Symbol;Acc:HGNC:9407]	FALSE	TRUE	6.90789	5	9	5	High	High	High	High	Phospho [S205(100); S237(99.1); S421(96.2); S742(100)]	15.42
High	ENSP00000349961.3	pep chromosome:GRCh38:3:160399650:160434953:1 gene:ENSG00000113810.16 transcript:ENST00000357388.8 gene_biotype:protein_coding transcript_biotype:protein_coding gene_symbol:SMC4 description:structural maintenance of chromosomes 4 [Source:HGNC Symbol;Acc:HGNC:14013]	FALSE	TRUE	3.26087	2	7	2	High	High	High	High	Phospho [S28(93.1); S41(93.8)]	18.84
High	ENSP00000401888.2	pep chromosome:GRCh38:3:12583798:12664148:-1 gene:ENSG00000132155.11 transcript:ENST00000442415.6 gene_biotype:protein_coding transcript_biotype:protein_coding gene_symbol:RAF1 description:Raf-1 proto-oncogene, serine/threonine kinase [Source:HGNC Symbol;Acc:HGNC:9829]	FALSE	TRUE	11.0778	5	9	4	High	High	High	High	Phospho [S29(99.9); S43(100); T258(83.3); S641(99.2); S662(99.4)]	13.78
High	ENSP00000372924.3	pep chromosome:GRCh38:18:9475513:9538114:1 gene:ENSG00000017797.13 transcript:ENST00000383432.8 gene_biotype:protein_coding transcript_biotype:protein_coding gene_symbol:RALBP1 description:ralA binding protein 1 [Source:HGNC Symbol;Acc:HGNC:9841]	FALSE	TRUE	5.03817	3	6	3	High	High	High	High	Phospho [S29(99.8); S92(100); S93(100)]	14.85
High	ENSP00000245185.5	pep chromosome:GRCh38:16:56608584:56609497:1 gene:ENSG00000125148.7 transcript:ENST00000245185.6 gene_biotype:protein_coding transcript_biotype:protein_coding gene_symbol:MT2A description:metallothionein 2A [Source:HGNC Symbol;Acc:HGNC:7406]	FALSE	TRUE	81.9672	4	5	4	High	High	High	High	Phospho [S58(100)]	14.52
High	ENSP00000386788.3	pep chromosome:GRCh38:2:180980605:181063425:1 gene:ENSG00000170035.16 transcript:ENST00000410062.9 gene_biotype:protein_coding transcript_biotype:protein_coding gene_symbol:UBE2E3 description:ubiquitin conjugating enzyme E2 E3 [Source:HGNC Symbol;Acc:HGNC:12479]	FALSE	TRUE	15.942	2	5	2	High	High	High	High	Phospho [S8(100)]	23.44
High	ENSP00000299213.7	pep chromosome:GRCh38:15:70829130:70854157:-1 gene:ENSG00000166173.11 transcript:ENST00000299213.10 gene_biotype:protein_coding transcript_biotype:protein_coding gene_symbol:LARP6 description:La ribonucleoprotein domain family member 6 [Source:HGNC Symbol;Acc:HGNC:24012]	FALSE	TRUE	5.49898	2	9	2	High	High	High	High	Phospho [S56(100)]	21.64
High	ENSP00000385614.3	pep chromosome:GRCh38:11:94419866:94493843:-1 gene:ENSG00000020922.12 transcript:ENST00000407439.7 gene_biotype:protein_coding transcript_biotype:protein_coding gene_symbol:MRE11 description:MRE11 homolog, double strand break repair nuclease [Source:HGNC Symbol;Acc:HGNC:7230]	FALSE	TRUE	3.09423	1	9	1	High	High	High	High	Phospho [S691(100); S692(100)]	37.88
High	ENSP00000494552.1	pep chromosome:GRCh38:17:27456470:27626435:1 gene:ENSG00000141068.14 transcript:ENST00000644974.1 gene_biotype:protein_coding transcript_biotype:protein_coding gene_symbol:KSR1 description:kinase suppressor of ras 1 [Source:HGNC Symbol;Acc:HGNC:6465]	FALSE	TRUE	9.15948	5	6	5	High	High	High	High	Phospho [T288(100); S311(92.4); S334(100); S406(100); S547(100)]	14.96
High	ENSP00000371917.2	pep chromosome:GRCh38:19:1229179:1237991:-1 gene:ENSG00000099625.13 transcript:ENST00000382477.6 gene_biotype:protein_coding transcript_biotype:protein_coding gene_symbol:CBARP description:CACN subunit beta associated regulatory protein [Source:HGNC Symbol;Acc:HGNC:28617]	FALSE	TRUE	8.68966	5	9	5	High	High	High	High	Phospho [S319(100); S342(98); S608(100); S641(100)]	17.96
High	ENSP00000263620.2	pep chromosome:GRCh38:19:926035:975939:1 gene:ENSG00000116017.11 transcript:ENST00000263620.8 gene_biotype:protein_coding transcript_biotype:protein_coding gene_symbol:ARID3A description:AT-rich interaction domain 3A [Source:HGNC Symbol;Acc:HGNC:3031]	FALSE	TRUE	6.40809	2	5	2	High	High	High	High	Phospho [S77(100)]	17.83
High	ENSP00000483133.1	pep chromosome:GRCh38:1:110339323:110346681:1 gene:ENSG00000162775.16 transcript:ENST00000618772.4 gene_biotype:protein_coding transcript_biotype:protein_coding gene_symbol:RBM15 description:RNA binding motif protein 15 [Source:HGNC Symbol;Acc:HGNC:14959]	FALSE	TRUE	6.65302	6	8	6	High	High	High	High	Phospho [S109(100); S294(100); T568(100); S670(100); S674(100); S700(100)]	5.03
High	ENSP00000216832.4	pep chromosome:GRCh38:14:39175254:39183220:1 gene:ENSG00000100941.9 transcript:ENST00000216832.9 gene_biotype:protein_coding transcript_biotype:protein_coding gene_symbol:PNN description:pinin, desmosome associated protein [Source:HGNC Symbol;Acc:HGNC:9162]	FALSE	TRUE	5.85774	5	10	5	High	High	High	High	Phospho [S100(100); S658(95.1); S690(100)]	24.39
High	ENSP00000317992.6	pep chromosome:GRCh38:1:944203:959256:-1 gene:ENSG00000188976.11 transcript:ENST00000327044.7 gene_biotype:protein_coding transcript_biotype:protein_coding gene_symbol:NOC2L description:NOC2 like nucleolar associated transcriptional repressor [Source:HGNC Symbol;Acc:HGNC:24517]	FALSE	TRUE	4.80641	2	5	2	High	High	High	High	Phospho [S49(100); S672(90.7)]	19.97
High	ENSP00000371983.3	pep chromosome:GRCh38:4:7763624:7872082:-1 gene:ENSG00000196526.10 transcript:ENST00000382543.3 gene_biotype:protein_coding transcript_biotype:protein_coding gene_symbol:AFAP1 description:actin filament associated protein 1 [Source:HGNC Symbol;Acc:HGNC:24017]	FALSE	TRUE	6.87961	4	11	4	High	High	High	High	Phospho [S632(100); S752(100); S795(93.5)]	18.84
High	ENSP00000348381.4	pep chromosome:GRCh38:10:110007984:110135565:1 gene:ENSG00000148700.15 transcript:ENST00000356080.9 gene_biotype:protein_coding transcript_biotype:protein_coding gene_symbol:ADD3 description:adducin 3 [Source:HGNC Symbol;Acc:HGNC:245]	FALSE	TRUE	6.23229	5	11	5	High	High	High	High	Phospho [S42(100)]	17.48
High	ENSP00000373060.4	pep chromosome:GRCh38:CHR_HSCHR6_MHC_QBL_CTG1:30689327:30707408:-1 gene:ENSG00000206481.11 transcript:ENST00000383566.8 gene_biotype:protein_coding transcript_biotype:protein_coding gene_symbol:MDC1 description:mediator of DNA damage checkpoint 1 [Source:HGNC Symbol;Acc:HGNC:21163]	FALSE	TRUE	4.1168	4	5	4	High	High	High	High	Phospho [S168(100); S299(98.6); T301(99.5); S329(100); T331(100); T455(98.4)]	16.12
High	ENSP00000176763.5	pep chromosome:GRCh38:5:172042079:172188224:-1 gene:ENSG00000072786.13 transcript:ENST00000176763.10 gene_biotype:protein_coding transcript_biotype:protein_coding gene_symbol:STK10 description:serine/threonine kinase 10 [Source:HGNC Symbol;Acc:HGNC:11388]	FALSE	TRUE	4.95868	3	5	3	High	High	High	High	Phospho [S438(100); S454(94.1); T952(92.9)]	22.81
High	ENSP00000314615.3	pep chromosome:GRCh38:20:63272865:63289344:1 gene:ENSG00000101199.13 transcript:ENST00000353546.7 gene_biotype:protein_coding transcript_biotype:protein_coding gene_symbol:ARFGAP1 description:ADP ribosylation factor GTPase activating protein 1 [Source:HGNC Symbol;Acc:HGNC:15852]	FALSE	TRUE	10.1449	3	8	3	High	High	High	High	Phospho [T189(93.8); S351(98.9); S386(100)]	16.11
High	ENSP00000246489.7	pep chromosome:GRCh38:14:103629241:103693743:1 gene:ENSG00000126214.21 transcript:ENST00000246489.11 gene_biotype:protein_coding transcript_biotype:protein_coding gene_symbol:KLC1 description:kinesin light chain 1 [Source:HGNC Symbol;Acc:HGNC:6387]	FALSE	TRUE	6.27943	4	7	4	High	High	High	High	Phospho [S521(94.4); S563(100); T633(90.1)]	11.61
High	ENSP00000491014.1	pep chromosome:GRCh38:14:39234115:39350264:1 gene:ENSG00000150527.17 transcript:ENST00000640607.1 gene_biotype:protein_coding transcript_biotype:protein_coding gene_symbol:MIA2 description:MIA SH3 domain ER export factor 2 [Source:HGNC Symbol;Acc:HGNC:18432]	FALSE	TRUE	3.18697	4	14	4	High	High	High	High	Phospho [S1144(98.8); T1200(98); S1204(88.5)]	26.77
High	ENSP00000424474.1	pep chromosome:GRCh38:17:50112671:50129882:-1 gene:ENSG00000167100.14 transcript:ENST00000503131.1 gene_biotype:protein_coding transcript_biotype:protein_coding gene_symbol:SAMD14 description:sterile alpha motif domain containing 14 [Source:HGNC Symbol;Acc:HGNC:27312]	FALSE	TRUE	18.427	6	9	6	High	High	High	High	Phospho [S77(85.7); S117(99.7); S179(95.5)]	14.58
High	ENSP00000441692.2	pep chromosome:GRCh38:14:32076985:32155083:1 gene:ENSG00000100852.13 transcript:ENST00000539826.6 gene_biotype:protein_coding transcript_biotype:protein_coding gene_symbol:ARHGAP5 description:Rho GTPase activating protein 5 [Source:HGNC Symbol;Acc:HGNC:675]	FALSE	TRUE	2.26365	4	5	4	High	High	High	High	Phospho [S1173(99.5); S1176(100); T1217(93.4)]	15.38
High	ENSP00000397894.2	pep chromosome:GRCh38:CHR_HSCHR6_MHC_COX_CTG1:31626429:31640044:-1 gene:ENSG00000229524.10 transcript:ENST00000449450.6 gene_biotype:protein_coding transcript_biotype:protein_coding gene_symbol:BAG6 description:BCL2 associated athanogene 6 [Source:HGNC Symbol;Acc:HGNC:13919]	FALSE	TRUE	3.09187	4	7	4	High	High	High	High	Phospho [S964(100); S973(100)]	21.25
High	ENSP00000264279.5	pep chromosome:GRCh38:2:202265763:202303661:1 gene:ENSG00000055044.11 transcript:ENST00000264279.10 gene_biotype:protein_coding transcript_biotype:protein_coding gene_symbol:NOP58 description:NOP58 ribonucleoprotein [Source:HGNC Symbol;Acc:HGNC:29926]	FALSE	TRUE	4.34783	2	6	2	High	High	High	High	Phospho [S502(100)]	21.04
High	ENSP00000263274.6	pep chromosome:GRCh38:19:48115445:48170344:-1 gene:ENSG00000105486.14 transcript:ENST00000263274.12 gene_biotype:protein_coding transcript_biotype:protein_coding gene_symbol:LIG1 description:DNA ligase 1 [Source:HGNC Symbol;Acc:HGNC:6598]	FALSE	TRUE	5.98477	4	5	4	High	High	High	High	Phospho [S66(100); S141(100); S911(100); S913(100)]	15.48
High	ENSP00000427792.1	pep chromosome:GRCh38:8:95134076:95154918:1 gene:ENSG00000175895.4 transcript:ENST00000519516.1 gene_biotype:protein_coding transcript_biotype:protein_coding gene_symbol:PLEKHF2 description:pleckstrin homology and FYVE domain containing 2 [Source:HGNC Symbol;Acc:HGNC:20757]	FALSE	TRUE	6.82731	1	5	1	High	High	High	High	Phospho [S239(100)]	19.86
High	ENSP00000479861.1	pep chromosome:GRCh38:2:241315861:241354024:1 gene:ENSG00000168385.18 transcript:ENST00000616972.4 gene_biotype:protein_coding transcript_biotype:protein_coding gene_symbol:SEPTIN2 description:septin 2 [Source:HGNC Symbol;Acc:HGNC:7729]	FALSE	TRUE	5.05051	2	18	2	High	High	High	High	Phospho [S253(100)]	60.37
High	ENSP00000410608.1	pep chromosome:GRCh38:2:55287842:55419856:-1 gene:ENSG00000115355.17 transcript:ENST00000436346.7 gene_biotype:protein_coding transcript_biotype:protein_coding gene_symbol:CCDC88A description:coiled-coil domain containing 88A [Source:HGNC Symbol;Acc:HGNC:25523]	FALSE	TRUE	3.36718	4	14	4	High	High	High	High	Phospho [S1678(92.8); S1701(89)]	19.67
High	ENSP00000261167.2	pep chromosome:GRCh38:12:14784582:14803478:-1 gene:ENSG00000084463.8 transcript:ENST00000261167.7 gene_biotype:protein_coding transcript_biotype:protein_coding gene_symbol:WBP11 description:WW domain binding protein 11 [Source:HGNC Symbol;Acc:HGNC:16461]	FALSE	TRUE	5.61622	3	5	3	High	High	High	High	Phospho [S353(100); S361(100); S364(100)]	23.76
High	ENSP00000432786.1	pep chromosome:GRCh38:11:67119263:67258082:1 gene:ENSG00000173120.15 transcript:ENST00000529006.7 gene_biotype:protein_coding transcript_biotype:protein_coding gene_symbol:KDM2A description:lysine demethylase 2A [Source:HGNC Symbol;Acc:HGNC:13606]	FALSE	TRUE	4.13081	3	4	3	High	High	High	High	Phospho [S28(100); S869(100)]	16.23
High	ENSP00000294383.5	pep chromosome:GRCh38:1:55066359:55215364:-1 gene:ENSG00000162402.14 transcript:ENST00000294383.7 gene_biotype:protein_coding transcript_biotype:protein_coding gene_symbol:USP24 description:ubiquitin specific peptidase 24 [Source:HGNC Symbol;Acc:HGNC:12623]	FALSE	TRUE	2.25191	5	6	4	High	High	High	High	Phospho [S1134(86.3); S1943(100); S2047(100); T2565(100)]	13.34
High	ENSP00000260385.6	pep chromosome:GRCh38:15:40735884:40755851:-1 gene:ENSG00000137824.16 transcript:ENST00000260385.10 gene_biotype:protein_coding transcript_biotype:protein_coding gene_symbol:RMDN3 description:regulator of microtubule dynamics 3 [Source:HGNC Symbol;Acc:HGNC:25550]	FALSE	TRUE	12.5532	2	6	2	High	High	High	High	Phospho [S46(88.9); S212(100)]	16.26
High	ENSP00000340836.6	pep chromosome:GRCh38:9:75088514:75147265:1 gene:ENSG00000134996.12 transcript:ENST00000346234.7 gene_biotype:protein_coding transcript_biotype:protein_coding gene_symbol:OSTF1 description:osteoclast stimulating factor 1 [Source:HGNC Symbol;Acc:HGNC:8510]	FALSE	TRUE	7.00935	1	14	1	High	High	High	High	Phospho [S213(100)]	42.37
High	ENSP00000399511.2	pep chromosome:GRCh38:3:171058414:171460405:-1 gene:ENSG00000154310.17 transcript:ENST00000436636.7 gene_biotype:protein_coding transcript_biotype:protein_coding gene_symbol:TNIK description:TRAF2 and NCK interacting kinase [Source:HGNC Symbol;Acc:HGNC:30765]	FALSE	TRUE	3.82353	5	10	3	High	High	High	High	Phospho [S541(100); S640(99.1); S680(87.6); S707(100); S769(100)]	16.87
High	ENSP00000362900.4	pep chromosome:GRCh38:1:29147743:29181900:-1 gene:ENSG00000116350.17 transcript:ENST00000373795.7 gene_biotype:protein_coding transcript_biotype:protein_coding gene_symbol:SRSF4 description:serine and arginine rich splicing factor 4 [Source:HGNC Symbol;Acc:HGNC:10786]	FALSE	TRUE	9.10931	5	8	5	High	High	High	High	Phospho [S261(99.9); S404(97.2); S406(87.9); S408(87.9); S431(100)]	10.98
High	ENSP00000496634.1	pep chromosome:GRCh38:12:6570208:6606373:-1 gene:ENSG00000111642.15 transcript:ENST00000645095.1 gene_biotype:protein_coding transcript_biotype:protein_coding gene_symbol:CHD4 description:chromodomain helicase DNA binding protein 4 [Source:HGNC Symbol;Acc:HGNC:1919]	FALSE	TRUE	3.45361	3	4	3	High	High	High	High	Phospho [S319(100); S1565(99.4); T1581(100)]	13.96
High	ENSP00000384018.1	pep chromosome:GRCh38:12:124324415:124495252:-1 gene:ENSG00000196498.13 transcript:ENST00000405201.5 gene_biotype:protein_coding transcript_biotype:protein_coding gene_symbol:NCOR2 description:nuclear receptor corepressor 2 [Source:HGNC Symbol;Acc:HGNC:7673]	FALSE	TRUE	2.78441	5	6	5	High	High	High	High	Phospho [T553(99.6); S554(97.8); S922(99.9); T1383(100); S1971(77.4)]	14.63
High	ENSP00000478059.1	pep chromosome:GRCh38:11:3855703:4093210:1 gene:ENSG00000167323.11 transcript:ENST00000616714.4 gene_biotype:protein_coding transcript_biotype:protein_coding gene_symbol:STIM1 description:stromal interaction molecule 1 [Source:HGNC Symbol;Acc:HGNC:11386]	FALSE	TRUE	6.19469	4	11	4	High	High	High	High	Phospho [S681(100); S724(84.7)]	21.14
High	ENSP00000320821.5	pep chromosome:GRCh38:17:4997950:5028401:1 gene:ENSG00000129250.12 transcript:ENST00000320785.10 gene_biotype:protein_coding transcript_biotype:protein_coding gene_symbol:KIF1C description:kinesin family member 1C [Source:HGNC Symbol;Acc:HGNC:6317]	FALSE	TRUE	3.53581	3	8	3	High	High	High	High	Phospho [S674(86); S1033(100)]	8.34
High	ENSP00000467556.1	pep chromosome:GRCh38:17:44395281:44503406:-1 gene:ENSG00000186566.13 transcript:ENST00000591680.6 gene_biotype:protein_coding transcript_biotype:protein_coding gene_symbol:GPATCH8 description:G-patch domain containing 8 [Source:HGNC Symbol;Acc:HGNC:29066]	FALSE	TRUE	4.46072	5	6	5	High	High	High	High	Phospho [S653(91.3); S738(90); S908(100); S911(100); S914(93.8); S1014(100); S1081(100)]	17.29
High	ENSP00000367498.1	pep chromosome:GRCh38:1:3778559:3796498:-1 gene:ENSG00000130764.10 transcript:ENST00000378251.3 gene_biotype:protein_coding transcript_biotype:protein_coding gene_symbol:LRRC47 description:leucine rich repeat containing 47 [Source:HGNC Symbol;Acc:HGNC:29207]	FALSE	TRUE	6.00343	3	15	3	High	High	High	High	Phospho [S520(91.9)]	19.9
High	ENSP00000352738.4	pep chromosome:GRCh38:4:75642782:75673969:-1 gene:ENSG00000138757.14 transcript:ENST00000359707.8 gene_biotype:protein_coding transcript_biotype:protein_coding gene_symbol:G3BP2 description:G3BP stress granule assembly factor 2 [Source:HGNC Symbol;Acc:HGNC:30291]	FALSE	TRUE	9.54357	2	11	1	High	High	High	High	Phospho [S149(100)]	37.45
High	ENSP00000368447.4	pep chromosome:GRCh38:13:44989552:45028270:1 gene:ENSG00000133114.17 transcript:ENST00000379151.8 gene_biotype:protein_coding transcript_biotype:protein_coding gene_symbol:GPALPP1 description:GPALPP motifs containing 1 [Source:HGNC Symbol;Acc:HGNC:20298]	FALSE	TRUE	13.5294	4	8	4	High	High	High	High	Phospho [S105(100); T138(100); S140(100); S141(100)]	29.33
High	ENSP00000440826.2	pep chromosome:GRCh38:1:92508696:92792404:-1 gene:ENSG00000067208.14 transcript:ENST00000540033.2 gene_biotype:protein_coding transcript_biotype:protein_coding gene_symbol:EVI5 description:ecotropic viral integration site 5 [Source:HGNC Symbol;Acc:HGNC:3501]	FALSE	TRUE	3.16687	1	3	1	High	High	High	High	Phospho [S787(100)]	14.08
High	ENSP00000425721.1	pep chromosome:GRCh38:5:96662074:96771679:1 gene:ENSG00000153113.23 transcript:ENST00000508830.5 gene_biotype:protein_coding transcript_biotype:protein_coding gene_symbol:CAST description:calpastatin [Source:HGNC Symbol;Acc:HGNC:1515]	FALSE	TRUE	6.70038	3	7	2	High	High	High	High	Phospho [S326(99.8)]	14.46
High	ENSP00000270824.1	pep chromosome:GRCh38:1:36322031:36324154:-1 gene:ENSG00000142694.6 transcript:ENST00000270824.1 gene_biotype:protein_coding transcript_biotype:protein_coding gene_symbol:EVA1B description:eva-1 homolog B [Source:HGNC Symbol;Acc:HGNC:25558]	FALSE	TRUE	11.5152	1	16	1	High	High	High	High	Phospho [T85(100)]	32.27
High	ENSP00000486357.1	pep chromosome:GRCh38:5:103129306:103203523:1 gene:ENSG00000145725.19 transcript:ENST00000627916.2 gene_biotype:protein_coding transcript_biotype:protein_coding gene_symbol:PPIP5K2 description:diphosphoinositol pentakisphosphate kinase 2 [Source:HGNC Symbol;Acc:HGNC:29035]	FALSE	TRUE	3.28638	3	5	3	High	High	High	High	Phospho [S38(100); S492(95); S493(100); S1021(100); S1031(100)]	17.89
High	ENSP00000483730.1	pep chromosome:GRCh38:19:46918676:47004307:1 gene:ENSG00000160007.19 transcript:ENST00000614079.1 gene_biotype:protein_coding transcript_biotype:protein_coding gene_symbol:ARHGAP35 description:Rho GTPase activating protein 35 [Source:HGNC Symbol;Acc:HGNC:4591]	FALSE	TRUE	3.33556	3	9	3	High	High	High	High	Phospho [S589(99.3); S975(100); S1179(100)]	23.98
High	ENSP00000355568.3	pep chromosome:GRCh38:1:234604269:234609525:-1 gene:ENSG00000168264.10 transcript:ENST00000366609.3 gene_biotype:protein_coding transcript_biotype:protein_coding gene_symbol:IRF2BP2 description:interferon regulatory factor 2 binding protein 2 [Source:HGNC Symbol;Acc:HGNC:21729]	FALSE	TRUE	10.2215	5	6	5	High	High	High	High	Phospho [S175(100); S240(99.4); S360(100); S457(88.1); S460(97.6)]	11.74
High	ENSP00000264645.6	pep chromosome:GRCh38:17:40140537:40172171:1 gene:ENSG00000108349.17 transcript:ENST00000264645.12 gene_biotype:protein_coding transcript_biotype:protein_coding gene_symbol:CASC3 description:CASC3 exon junction complex subunit [Source:HGNC Symbol;Acc:HGNC:17040]	FALSE	TRUE	6.40114	3	4	3	High	High	High	High	Phospho [S28(89.9); S148(100)]	12.08
High	ENSP00000429900.1	pep chromosome:GRCh38:8:130052104:130443674:-1 gene:ENSG00000153317.15 transcript:ENST00000518721.6 gene_biotype:protein_coding transcript_biotype:protein_coding gene_symbol:ASAP1 description:ArfGAP with SH3 domain, ankyrin repeat and PH domain 1 [Source:HGNC Symbol;Acc:HGNC:2720]	FALSE	TRUE	5.04872	4	7	4	High	High	High	High	Phospho [S717(100); S839(99.5); S1008(100); S1027(100)]	10.25
High	ENSP00000369887.2	pep chromosome:GRCh38:15:58879050:58933679:-1 gene:ENSG00000137776.17 transcript:ENST00000380516.7 gene_biotype:protein_coding transcript_biotype:protein_coding gene_symbol:SLTM description:SAFB like transcription modulator [Source:HGNC Symbol;Acc:HGNC:20709]	FALSE	TRUE	4.35203	4	5	4	High	High	High	High	Phospho [S289(100); S371(99.3); S374(98); S553(100)]	14.84
High	ENSP00000481626.1	pep chromosome:GRCh38:18:46174034:46266992:1 gene:ENSG00000152242.11 transcript:ENST00000615052.5 gene_biotype:protein_coding transcript_biotype:protein_coding gene_symbol:C18orf25 description:chromosome 18 open reading frame 25 [Source:HGNC Symbol;Acc:HGNC:28172]	FALSE	TRUE	8.16832	2	4	2	High	High	High	High	Phospho [S66(81.3); S145(99.1)]	10.98
High	ENSP00000307666.5	pep chromosome:GRCh38:7:93232366:93361123:1 gene:ENSG00000004766.17 transcript:ENST00000305866.10 gene_biotype:protein_coding transcript_biotype:protein_coding gene_symbol:VPS50 description:VPS50 subunit of EARP/GARPII complex [Source:HGNC Symbol;Acc:HGNC:25956]	FALSE	TRUE	1.86722	2	6	2	High	High	High	High	Phospho [S559(100)]	18.01
High	ENSP00000350518.3	pep chromosome:GRCh38:4:75644389:75673401:-1 gene:ENSG00000138757.14 transcript:ENST00000357854.7 gene_biotype:protein_coding transcript_biotype:protein_coding gene_symbol:G3BP2 description:G3BP stress granule assembly factor 2 [Source:HGNC Symbol;Acc:HGNC:30291]	FALSE	TRUE	10.6904	2	11	1	High	High	High	High	Phospho [S149(100); T227(92.1)]	36.92
High	ENSP00000229922.2	pep chromosome:GRCh38:6:17393595:17557780:1 gene:ENSG00000112186.12 transcript:ENST00000229922.7 gene_biotype:protein_coding transcript_biotype:protein_coding gene_symbol:CAP2 description:cyclase associated actin cytoskeleton regulatory protein 2 [Source:HGNC Symbol;Acc:HGNC:20039]	FALSE	TRUE	4.40252	2	11	2	High	High	High	High	Phospho [S312(95.2)]	16.76
High	ENSP00000377747.4	pep chromosome:GRCh38:15:92900324:93027996:1 gene:ENSG00000173575.21 transcript:ENST00000394196.9 gene_biotype:protein_coding transcript_biotype:protein_coding gene_symbol:CHD2 description:chromodomain helicase DNA binding protein 2 [Source:HGNC Symbol;Acc:HGNC:1917]	FALSE	TRUE	2.95405	5	5	5	High	High	High	High	Phospho [S156(99.6); S168(98.3); S207(100); S208(100); S1085(100); S1087(100)]	15.68
High	ENSP00000378332.3	pep chromosome:GRCh38:16:31472152:31477958:1 gene:ENSG00000140682.19 transcript:ENST00000394863.8 gene_biotype:protein_coding transcript_biotype:protein_coding gene_symbol:TGFB1I1 description:transforming growth factor beta 1 induced transcript 1 [Source:HGNC Symbol;Acc:HGNC:11767]	FALSE	TRUE	19.3059	4	5	4	High	High	High	High	Phospho [S68(100); S122(100); S137(99.4); S141(93); S194(100)]	9.51
High	ENSP00000395487.2	pep chromosome:GRCh38:4:145133650:145180589:-1 gene:ENSG00000164164.17 transcript:ENST00000447906.8 gene_biotype:protein_coding transcript_biotype:protein_coding gene_symbol:OTUD4 description:OTU deubiquitinase 4 [Source:HGNC Symbol;Acc:HGNC:24949]	FALSE	TRUE	3.68043	4	6	4	High	High	High	High	Phospho [S443(100); S548(92.8); S1023(100); S1024(100)]	15
High	ENSP00000265069.8	pep chromosome:GRCh38:5:32354350:32444740:-1 gene:ENSG00000056097.16 transcript:ENST00000265069.13 gene_biotype:protein_coding transcript_biotype:protein_coding gene_symbol:ZFR description:zinc finger RNA binding protein [Source:HGNC Symbol;Acc:HGNC:17277]	FALSE	TRUE	1.39665	3	6	3	High	High	High	High	Phospho [S1054(100)]	20.38
High	ENSP00000264670.6	pep chromosome:GRCh38:5:6599239:6633044:-1 gene:ENSG00000037474.15 transcript:ENST00000264670.11 gene_biotype:protein_coding transcript_biotype:protein_coding gene_symbol:NSUN2 description:NOP2/Sun RNA methyltransferase 2 [Source:HGNC Symbol;Acc:HGNC:25994]	FALSE	TRUE	6.5189	2	8	2	High	High	High	High	Phospho [S456(100); S743(100); S751(100)]	28.38
High	ENSP00000431150.1	pep chromosome:GRCh38:14:73058532:73120391:1 gene:ENSG00000119707.14 transcript:ENST00000527432.5 gene_biotype:protein_coding transcript_biotype:protein_coding gene_symbol:RBM25 description:RNA binding motif protein 25 [Source:HGNC Symbol;Acc:HGNC:23244]	FALSE	TRUE	3.79597	4	5	4	High	High	High	High	Phospho [S583(100)]	8.18
High	ENSP00000334153.4	pep chromosome:GRCh38:3:16315845:16513699:-1 gene:ENSG00000131378.14 transcript:ENST00000334133.9 gene_biotype:protein_coding transcript_biotype:protein_coding gene_symbol:RFTN1 description:raftlin, lipid raft linker 1 [Source:HGNC Symbol;Acc:HGNC:30278]	FALSE	TRUE	12.4567	4	7	4	High	High	High	High	Phospho [S199(100); S220(99.9); S555(100)]	17.96
High	ENSP00000351015.4	pep chromosome:GRCh38:17:31094927:31377677:1 gene:ENSG00000196712.17 transcript:ENST00000358273.8 gene_biotype:protein_coding transcript_biotype:protein_coding gene_symbol:NF1 description:neurofibromin 1 [Source:HGNC Symbol;Acc:HGNC:7765]	FALSE	TRUE	1.83163	3	6	3	High	High	High	High	Phospho [S2515(99.7); T2565(99.4); S2597(99.1)]	16.57
High	ENSP00000361883.3	pep chromosome:GRCh38:1:40040233:40072649:1 gene:ENSG00000131236.17 transcript:ENST00000372797.7 gene_biotype:protein_coding transcript_biotype:protein_coding gene_symbol:CAP1 description:cyclase associated actin cytoskeleton regulatory protein 1 [Source:HGNC Symbol;Acc:HGNC:20040]	FALSE	TRUE	12	4	6	4	High	High	High	High	Phospho [S34(100)]	7.91
High	ENSP00000340797.3	pep chromosome:GRCh38:11:6448613:6473941:-1 gene:ENSG00000110171.20 transcript:ENST00000345851.8 gene_biotype:protein_coding transcript_biotype:protein_coding gene_symbol:TRIM3 description:tripartite motif containing 3 [Source:HGNC Symbol;Acc:HGNC:10064]	FALSE	TRUE	3.49462	3	5	3	High	High	High	High	Phospho [S7(100); S437(100)]	16.7
High	ENSP00000500802.1	pep chromosome:GRCh38:1:155946855:155991212:-1 gene:ENSG00000116584.19 transcript:ENST00000673475.1 gene_biotype:protein_coding transcript_biotype:protein_coding gene_symbol:ARHGEF2 description:Rho/Rac guanine nucleotide exchange factor 2 [Source:HGNC Symbol;Acc:HGNC:682]	FALSE	TRUE	8.1488	7	10	7	High	High	High	High	Phospho [S157(80); S788(89.9); S862(94.4); S925(100); S1029(100); S1075(100); S1099(99.6); S1103(100)]	17.4
High	ENSP00000232978.8	pep chromosome:GRCh38:3:42600686:42648735:1 gene:ENSG00000114857.18 transcript:ENST00000232978.13 gene_biotype:protein_coding transcript_biotype:protein_coding gene_symbol:NKTR description:natural killer cell triggering receptor [Source:HGNC Symbol;Acc:HGNC:7833]	FALSE	TRUE	4.65116	4	8	4	High	High	High	High	Phospho [S243(85.8); S920(83.7); S923(100); S965(92.4)]	18.65
High	ENSP00000360034.2	pep chromosome:GRCh38:1:67411038:67430386:-1 gene:ENSG00000142864.14 transcript:ENST00000370995.6 gene_biotype:protein_coding transcript_biotype:protein_coding gene_symbol:SERBP1 description:SERPINE1 mRNA binding protein 1 [Source:HGNC Symbol;Acc:HGNC:17860]	FALSE	TRUE	11.5196	4	8	4	High	High	High	High	Phospho [S234(99.8); S330(91.2); S394(90.8)]	9.6
High	ENSP00000358810.3	pep chromosome:GRCh38:1:110034624:110054641:1 gene:ENSG00000143093.15 transcript:ENST00000369795.8 gene_biotype:protein_coding transcript_biotype:protein_coding gene_symbol:STRIP1 description:striatin interacting protein 1 [Source:HGNC Symbol;Acc:HGNC:25916]	FALSE	TRUE	4.54002	2	5	2	High	High	High	High	Phospho [S59(100)]	25.74
High	ENSP00000348984.4	pep chromosome:GRCh38:21:33543038:33577514:1 gene:ENSG00000159140.20 transcript:ENST00000356577.9 gene_biotype:protein_coding transcript_biotype:protein_coding gene_symbol:SON description:SON DNA binding protein [Source:HGNC Symbol;Acc:HGNC:11183]	FALSE	TRUE	3.17395	5	11	5	High	High	High	High	Phospho [S283(99.8); S1697(100); S1783(91.6); S2009(100); S2013(93.4); S2129(100)]	24.4
High	ENSP00000432149.1	pep chromosome:GRCh38:14:55580322:55684579:1 gene:ENSG00000126777.18 transcript:ENST00000459737.5 gene_biotype:protein_coding transcript_biotype:nonsense_mediated_decay gene_symbol:KTN1 description:kinectin 1 [Source:HGNC Symbol;Acc:HGNC:6467]	FALSE	TRUE	3.75829	3	5	3	High	High	High	High	Phospho [S75(100); T153(99.4); S1313(99.5)]	16.06
High	ENSP00000358283.4	pep chromosome:GRCh38:6:96521806:96555276:1 gene:ENSG00000014123.10 transcript:ENST00000369278.5 gene_biotype:protein_coding transcript_biotype:protein_coding gene_symbol:UFL1 description:UFM1 specific ligase 1 [Source:HGNC Symbol;Acc:HGNC:23039]	FALSE	TRUE	2.01511	2	4	2	High	High	High	High	Phospho [S458(100)]	13.59
High	ENSP00000404037.1	pep chromosome:GRCh38:CHR_HSCHR6_MHC_SSTO_CTG1:31721342:31728085:-1 gene:ENSG00000223639.6 transcript:ENST00000438750.5 gene_biotype:protein_coding transcript_biotype:protein_coding gene_symbol:CLIC1 description:chloride intracellular channel 1 [Source:HGNC Symbol;Acc:HGNC:2062]	FALSE	TRUE	30.7054	4	5	4	High	High	High	High	Phospho [S156(84.9)]	13.14
High	ENSP00000355923.4	pep chromosome:GRCh38:1:214348700:214551602:-1 gene:ENSG00000152104.12 transcript:ENST00000366956.10 gene_biotype:protein_coding transcript_biotype:protein_coding gene_symbol:PTPN14 description:protein tyrosine phosphatase non-receptor type 14 [Source:HGNC Symbol;Acc:HGNC:9647]	FALSE	TRUE	3.1171	3	9	3	High	High	High	High	Phospho [S314(99.9); S594(99.6); S642(89.1)]	24.62
High	ENSP00000441668.2	pep chromosome:GRCh38:10:68106117:68212012:1 gene:ENSG00000138347.15 transcript:ENST00000540630.5 gene_biotype:protein_coding transcript_biotype:protein_coding gene_symbol:MYPN description:myopalladin [Source:HGNC Symbol;Acc:HGNC:23246]	FALSE	TRUE	4.01515	2	5	2	High	High	High	High	Phospho [T251(78.8); S928(100)]	13.17
High	ENSP00000489602.1	pep chromosome:GRCh38:CHR_HG26_PATCH:38878596:38899654:-1 gene:ENSG00000283100.2 transcript:ENST00000634533.2 gene_biotype:protein_coding transcript_biotype:protein_coding gene_symbol:SIRT2 description:sirtuin 2 [Source:HGNC Symbol;Acc:HGNC:10886]	FALSE	TRUE	6.6838	1	9	1	High	High	High	High	Phospho [S23(100); S25(100)]	28.33
High	ENSP00000442739.2	pep chromosome:GRCh38:12:991233:1490729:1 gene:ENSG00000082805.20 transcript:ENST00000546231.6 gene_biotype:protein_coding transcript_biotype:protein_coding gene_symbol:ERC1 description:ELKS/RAB6-interacting/CAST family member 1 [Source:HGNC Symbol;Acc:HGNC:17072]	FALSE	TRUE	2.76786	3	10	3	High	High	High	High	Phospho [S21(100); S37(85.4)]	12.77
High	ENSP00000362456.3	pep chromosome:GRCh38:X:76173062:76178314:1 gene:ENSG00000102390.11 transcript:ENST00000373358.8 gene_biotype:protein_coding transcript_biotype:protein_coding gene_symbol:PBDC1 description:polysaccharide biosynthesis domain containing 1 [Source:HGNC Symbol;Acc:HGNC:28790]	FALSE	TRUE	12.0172	4	8	4	High	High	High	High	Phospho [S181(100); S197(100)]	11.11
High	ENSP00000360305.3	pep chromosome:GRCh38:10:95237572:95291003:-1 gene:ENSG00000107438.9 transcript:ENST00000329399.7 gene_biotype:protein_coding transcript_biotype:protein_coding gene_symbol:PDLIM1 description:PDZ and LIM domain 1 [Source:HGNC Symbol;Acc:HGNC:2067]	FALSE	TRUE	13.9818	4	4	4	High	High	High	High	Phospho [S90(100); T316(100)]	12.36
High	ENSP00000327539.6	pep chromosome:GRCh38:5:179614181:179623168:-1 gene:ENSG00000169045.17 transcript:ENST00000329433.10 gene_biotype:protein_coding transcript_biotype:protein_coding gene_symbol:HNRNPH1 description:heterogeneous nuclear ribonucleoprotein H1 [Source:HGNC Symbol;Acc:HGNC:5041]	FALSE	TRUE	6.99153	2	4	2	High	High	High	High	Phospho [S104(100)]	14.82
High	ENSP00000338020.4	pep chromosome:GRCh38:3:184314495:184335357:1 gene:ENSG00000114867.20 transcript:ENST00000352767.7 gene_biotype:protein_coding transcript_biotype:protein_coding gene_symbol:EIF4G1 description:eukaryotic translation initiation factor 4 gamma 1 [Source:HGNC Symbol;Acc:HGNC:3296]	FALSE	TRUE	2.98879	7	15	6	High	High	High	High	Phospho [S711(100); S1201(100); S1238(100); S1603(100)]	21.37
High	ENSP00000377665.2	pep chromosome:GRCh38:9:125261832:125363329:1 gene:ENSG00000165219.22 transcript:ENST00000394105.6 gene_biotype:protein_coding transcript_biotype:protein_coding gene_symbol:GAPVD1 description:GTPase activating protein and VPS9 domains 1 [Source:HGNC Symbol;Acc:HGNC:23375]	FALSE	TRUE	3.29523	5	5	5	High	High	High	High	Phospho [S742(100); S746(87.9); S790(94.8); S929(86.3); S993(100)]	11.93
High	ENSP00000325905.6	pep chromosome:GRCh38:2:38743599:38751361:-1 gene:ENSG00000115875.19 transcript:ENST00000313117.11 gene_biotype:protein_coding transcript_biotype:protein_coding gene_symbol:SRSF7 description:serine and arginine rich splicing factor 7 [Source:HGNC Symbol;Acc:HGNC:10789]	FALSE	TRUE	16.3866	8	22	8	High	High	High	High	Phospho [S155(100); S157(100); S159(100); S171(100); S173(100); S179(91.2); S181(99); S225(100); S227(100); S231(99.6)]	17
High	ENSP00000329797.6	pep chromosome:GRCh38:11:115176295:115504565:-1 gene:ENSG00000182985.17 transcript:ENST00000331581.10 gene_biotype:protein_coding transcript_biotype:protein_coding gene_symbol:CADM1 description:cell adhesion molecule 1 [Source:HGNC Symbol;Acc:HGNC:5951]	FALSE	TRUE	5.30786	1	2	1	High	High	High	High	Phospho [S463(100)]	13.67
High	ENSP00000256707.3	pep chromosome:GRCh38:2:8728857:8837625:-1 gene:ENSG00000134313.15 transcript:ENST00000256707.7 gene_biotype:protein_coding transcript_biotype:protein_coding gene_symbol:KIDINS220 description:kinase D interacting substrate 220 [Source:HGNC Symbol;Acc:HGNC:29508]	FALSE	TRUE	1.58103	2	7	2	High	High	High	High	Phospho [S918(100)]	18.95
High	ENSP00000499554.1	pep chromosome:GRCh38:9:68780039:68781028:1 gene:ENSG00000107242.19 transcript:ENST00000653702.1 gene_biotype:protein_coding transcript_biotype:protein_coding gene_symbol:PIP5K1B description:phosphatidylinositol-4-phosphate 5-kinase type 1 beta [Source:HGNC Symbol;Acc:HGNC:8995]	FALSE	TRUE	23.7082	4	6	4	High	High	High	High	Phospho [S79(98.9); S118(100); S189(99.3); S312(98.8)]	17.76
High	ENSP00000473384.2	pep chromosome:GRCh38:13:102807146:102876001:1 gene:ENSG00000134899.21 transcript:ENST00000602836.2 gene_biotype:protein_coding transcript_biotype:protein_coding gene_symbol:ERCC5 description:ERCC excision repair 5, endonuclease [Source:HGNC Symbol;Acc:HGNC:3437]	FALSE	TRUE	2.2561	3	5	3	High	High	High	High	Phospho [S795(92.8); S838(99.9); S1016(100); S1017(100)]	15.2
High	ENSP00000386636.1	pep chromosome:GRCh38:2:169799279:169812064:1 gene:ENSG00000138385.16 transcript:ENST00000409333.1 gene_biotype:protein_coding transcript_biotype:protein_coding gene_symbol:SSB description:small RNA binding exonuclease protection factor La [Source:HGNC Symbol;Acc:HGNC:11316]	FALSE	TRUE	5.63725	3	4	3	High	High	High	High	Phospho [S366(100)]	13.23
High	ENSP00000375851.3	pep chromosome:GRCh38:2:238320441:238400822:1 gene:ENSG00000204104.12 transcript:ENST00000391993.7 gene_biotype:protein_coding transcript_biotype:protein_coding gene_symbol:TRAF3IP1 description:TRAF3 interacting protein 1 [Source:HGNC Symbol;Acc:HGNC:17861]	FALSE	TRUE	5.44	2	6	2	High	High	High	High	Phospho [S359(86.5); S410(100)]	13.35
High	ENSP00000358335.3	pep chromosome:GRCh38:6:90513579:90587072:-1 gene:ENSG00000135341.18 transcript:ENST00000369329.8 gene_biotype:protein_coding transcript_biotype:protein_coding gene_symbol:MAP3K7 description:mitogen-activated protein kinase kinase kinase 7 [Source:HGNC Symbol;Acc:HGNC:6859]	FALSE	TRUE	4.9505	3	5	3	High	High	High	High	Phospho [S389(100); S439(100)]	16.19
High	ENSP00000403817.1	pep chromosome:GRCh38:12:56712428:56725542:-1 gene:ENSG00000196531.11 transcript:ENST00000454682.5 gene_biotype:protein_coding transcript_biotype:protein_coding gene_symbol:NACA description:nascent polypeptide associated complex subunit alpha [Source:HGNC Symbol;Acc:HGNC:7629]	FALSE	TRUE	1.68431	1	19	1	High	High	High	High	Phospho [S2029(97.2)]	51.33
High	ENSP00000484580.1	pep chromosome:GRCh38:3:195514428:195543325:-1 gene:ENSG00000184203.8 transcript:ENST00000618156.5 gene_biotype:protein_coding transcript_biotype:protein_coding gene_symbol:PPP1R2 description:protein phosphatase 1 regulatory inhibitor subunit 2 [Source:HGNC Symbol;Acc:HGNC:9288]	FALSE	TRUE	9.26829	1	4	1	High	High	High	High	Phospho [S121(100); S122(100)]	13.94
High	ENSP00000427562.1	pep chromosome:GRCh38:1:179099330:179229677:-1 gene:ENSG00000143322.21 transcript:ENST00000502732.6 gene_biotype:protein_coding transcript_biotype:protein_coding gene_symbol:ABL2 description:ABL proto-oncogene 2, non-receptor tyrosine kinase [Source:HGNC Symbol;Acc:HGNC:77]	FALSE	TRUE	3.29949	3	7	3	High	High	High	High	Phospho [S631(98.8); S820(98.8)]	12.69
High	ENSP00000379392.2	pep chromosome:GRCh38:16:20733664:20741818:-1 gene:ENSG00000066654.14 transcript:ENST00000396083.7 gene_biotype:protein_coding transcript_biotype:protein_coding gene_symbol:THUMPD1 description:THUMP domain containing 1 [Source:HGNC Symbol;Acc:HGNC:23807]	FALSE	TRUE	6.79887	3	4	3	High	High	High	High	Phospho [S86(100); S88(100)]	21.29
High	ENSP00000258198.2	pep chromosome:GRCh38:16:66720893:66751609:-1 gene:ENSG00000135720.13 transcript:ENST00000258198.7 gene_biotype:protein_coding transcript_biotype:protein_coding gene_symbol:DYNC1LI2 description:dynein cytoplasmic 1 light intermediate chain 2 [Source:HGNC Symbol;Acc:HGNC:2966]	FALSE	TRUE	3.86179	2	3	2	High	High	High	High	Phospho [S194(100)]	11.3
High	ENSP00000434311.1	pep chromosome:GRCh38:11:77618533:77637776:-1 gene:ENSG00000074201.9 transcript:ENST00000528364.1 gene_biotype:protein_coding transcript_biotype:protein_coding gene_symbol:CLNS1A description:chloride nucleotide-sensitive channel 1A [Source:HGNC Symbol;Acc:HGNC:2080]	FALSE	TRUE	11.8143	2	3	2	High	High	High	High	Phospho [S102(100)]	13.04
High	ENSP00000365439.3	pep chromosome:GRCh38:9:83968083:83980215:-1 gene:ENSG00000165119.21 transcript:ENST00000376263.8 gene_biotype:protein_coding transcript_biotype:protein_coding gene_symbol:HNRNPK description:heterogeneous nuclear ribonucleoprotein K [Source:HGNC Symbol;Acc:HGNC:5044]	FALSE	TRUE	9.69828	4	15	4	High	High	High	High	Phospho [S284(100); S379(88.6)]	12.02
High	ENSP00000269296.7	pep chromosome:GRCh38:17:4833400:4898054:1 gene:ENSG00000141503.17 transcript:ENST00000347992.11 gene_biotype:protein_coding transcript_biotype:protein_coding gene_symbol:MINK1 description:misshapen like kinase 1 [Source:HGNC Symbol;Acc:HGNC:17565]	FALSE	TRUE	6.98388	5	7	4	High	High	High	High	Phospho [S324(98); S326(93.8); S601(99.9); S696(100); S726(100); S741(92.3)]	16.75
High	ENSP00000271526.4	pep chromosome:GRCh38:1:156767535:156800815:1 gene:ENSG00000143294.15 transcript:ENST00000271526.9 gene_biotype:protein_coding transcript_biotype:protein_coding gene_symbol:PRCC description:proline rich mitotic checkpoint control factor [Source:HGNC Symbol;Acc:HGNC:9343]	FALSE	TRUE	11.609	4	5	4	High	High	High	High	Phospho [S157(100); S159(100); S212(91.3); S267(91.2)]	14.39
High	ENSP00000271688.6	pep chromosome:GRCh38:1:150965173:150975003:-1 gene:ENSG00000143418.19 transcript:ENST00000271688.10 gene_biotype:protein_coding transcript_biotype:protein_coding gene_symbol:CERS2 description:ceramide synthase 2 [Source:HGNC Symbol;Acc:HGNC:14076]	FALSE	TRUE	7.10526	2	6	2	High	High	High	High	Phospho [T346(100); S348(100); S349(100)]	14.97
High	ENSP00000376309.2	pep chromosome:GRCh38:2:177212563:177220085:1 gene:ENSG00000170144.20 transcript:ENST00000392524.6 gene_biotype:protein_coding transcript_biotype:protein_coding gene_symbol:HNRNPA3 description:heterogeneous nuclear ribonucleoprotein A3 [Source:HGNC Symbol;Acc:HGNC:24941]	FALSE	TRUE	5.82011	1	7	1	High	High	High	High	Phospho [S358(99.8)]	13.51
High	ENSP00000369218.4	pep chromosome:GRCh38:10:6089034:6117447:1 gene:ENSG00000134453.16 transcript:ENST00000379888.9 gene_biotype:protein_coding transcript_biotype:protein_coding gene_symbol:RBM17 description:RNA binding motif protein 17 [Source:HGNC Symbol;Acc:HGNC:16944]	FALSE	TRUE	8.97756	3	6	3	High	High	High	High	Phospho [S155(100); S222(99.2)]	21.81
High	ENSP00000323687.6	pep chromosome:GRCh38:17:76389456:76453152:-1 gene:ENSG00000175931.13 transcript:ENST00000319380.12 gene_biotype:protein_coding transcript_biotype:protein_coding gene_symbol:UBE2O description:ubiquitin conjugating enzyme E2 O [Source:HGNC Symbol;Acc:HGNC:29554]	FALSE	TRUE	6.88854	3	6	3	High	High	High	High	Phospho [S87(100); S89(100); S1196(86.3)]	14.77
High	ENSP00000480987.1	pep chromosome:GRCh38:6:52264014:52284881:-1 gene:ENSG00000112118.20 transcript:ENST00000616552.4 gene_biotype:protein_coding transcript_biotype:protein_coding gene_symbol:MCM3 description:minichromosome maintenance complex component 3 [Source:HGNC Symbol;Acc:HGNC:6945]	FALSE	TRUE	6.21336	4	6	4	High	High	High	High	Phospho [S717(100); T719(100); S756(89.6); T767(100); S773(92.8)]	16.13
High	ENSP00000390158.2	pep chromosome:GRCh38:15:63608618:63833948:-1 gene:ENSG00000103657.14 transcript:ENST00000443617.7 gene_biotype:protein_coding transcript_biotype:protein_coding gene_symbol:HERC1 description:HECT and RLD domain containing E3 ubiquitin protein ligase family member 1 [Source:HGNC Symbol;Acc:HGNC:4867]	FALSE	TRUE	0.905164	3	6	3	High	High	High	High	Phospho [S1406(100); S1514(89.4); S1517(100); Y1526(90.3); S4857(99.5)]	15.79
High	ENSP00000405111.2	pep chromosome:GRCh38:2:38797729:38875934:-1 gene:ENSG00000163214.21 transcript:ENST00000457308.6 gene_biotype:protein_coding transcript_biotype:protein_coding gene_symbol:DHX57 description:DExH-box helicase 57 [Source:HGNC Symbol;Acc:HGNC:20086]	FALSE	TRUE	2.23665	2	4	2	High	High	High	High	Phospho [S127(100); S132(100)]	14.23
High	ENSP00000328992.4	pep chromosome:GRCh38:21:32733899:32771755:-1 gene:ENSG00000159086.15 transcript:ENST00000331923.9 gene_biotype:protein_coding transcript_biotype:protein_coding gene_symbol:PAXBP1 description:PAX3 and PAX7 binding protein 1 [Source:HGNC Symbol;Acc:HGNC:13579]	FALSE	TRUE	2.18103	3	4	3	High	High	High	High	Phospho [S262(100)]	10.54
High	ENSP00000256858.5	pep chromosome:GRCh38:18:62187258:62307112:1 gene:ENSG00000134444.14 transcript:ENST00000256858.10 gene_biotype:protein_coding transcript_biotype:protein_coding gene_symbol:RELCH description:RAB11 binding and LisH domain, coiled-coil and HEAT repeat containing [Source:HGNC Symbol;Acc:HGNC:29289]	FALSE	TRUE	2.08	4	9	4	High	High	High	High	Phospho [S186(98.5)]	12.56
High	ENSP00000494410.1	pep chromosome:GRCh38:19:47256523:47273701:1 gene:ENSG00000105321.14 transcript:ENST00000643617.1 gene_biotype:protein_coding transcript_biotype:protein_coding gene_symbol:CCDC9 description:coiled-coil domain containing 9 [Source:HGNC Symbol;Acc:HGNC:24560]	FALSE	TRUE	8.17717	2	7	2	High	High	High	High	Phospho [S376(100); S521(100)]	15.09
High	ENSP00000308369.2	pep chromosome:GRCh38:12:65169583:65248355:1 gene:ENSG00000174106.3 transcript:ENST00000308330.3 gene_biotype:protein_coding transcript_biotype:protein_coding gene_symbol:LEMD3 description:LEM domain containing 3 [Source:HGNC Symbol;Acc:HGNC:28887]	FALSE	TRUE	3.84193	2	5	2	High	High	High	High	Phospho [S140(100); S141(100); S259(93.6); S261(100)]	20.01
High	ENSP00000269701.1	pep chromosome:GRCh38:19:15353385:15379787:-1 gene:ENSG00000105127.9 transcript:ENST00000269701.7 gene_biotype:protein_coding transcript_biotype:protein_coding gene_symbol:AKAP8 description:A-kinase anchoring protein 8 [Source:HGNC Symbol;Acc:HGNC:378]	FALSE	TRUE	5.0578	2	3	2	High	High	High	High	Phospho [S328(100); S339(100)]	13.96
High	ENSP00000374273.3	pep chromosome:GRCh38:3:97822011:97944984:1 gene:ENSG00000080200.10 transcript:ENST00000389622.7 gene_biotype:protein_coding transcript_biotype:protein_coding gene_symbol:CRYBG3 description:crystallin beta-gamma domain containing 3 [Source:HGNC Symbol;Acc:HGNC:34427]	FALSE	TRUE	2.0202	4	4	4	High	High	High	High	Phospho [S457(100); S931(99.8); S1280(94); S1934(100)]	11.74
High	ENSP00000381007.2	pep chromosome:GRCh38:12:77830894:78213010:1 gene:ENSG00000067798.16 transcript:ENST00000397909.7 gene_biotype:protein_coding transcript_biotype:protein_coding gene_symbol:NAV3 description:neuron navigator 3 [Source:HGNC Symbol;Acc:HGNC:15998]	FALSE	TRUE	1.71908	5	6	5	High	High	High	High	Phospho [S358(81.7); S1039(100)]	10.25
High	ENSP00000379915.2	pep chromosome:GRCh38:12:6927959:6942321:1 gene:ENSG00000111676.15 transcript:ENST00000396684.3 gene_biotype:protein_coding transcript_biotype:protein_coding gene_symbol:ATN1 description:atrophin 1 [Source:HGNC Symbol;Acc:HGNC:3033]	FALSE	TRUE	3.78151	3	8	3	High	High	High	High	Phospho [S77(85.4); S101(99.8); S107(100); S645(100)]	16.07
High	ENSP00000357177.3	pep chromosome:GRCh38:1:156934840:157045370:-1 gene:ENSG00000132694.18 transcript:ENST00000368194.7 gene_biotype:protein_coding transcript_biotype:protein_coding gene_symbol:ARHGEF11 description:Rho guanine nucleotide exchange factor 11 [Source:HGNC Symbol;Acc:HGNC:14580]	FALSE	TRUE	3.77721	3	5	3	High	High	High	High	Phospho [S35(90); S675(94.9); S1559(100)]	15.93
High	ENSP00000380763.2	pep chromosome:GRCh38:22:30925130:30968774:-1 gene:ENSG00000133422.13 transcript:ENST00000397641.8 gene_biotype:protein_coding transcript_biotype:protein_coding gene_symbol:MORC2 description:MORC family CW-type zinc finger 2 [Source:HGNC Symbol;Acc:HGNC:23573]	FALSE	TRUE	4.36047	4	4	4	High	High	High	High	Phospho [S615(100); S743(100); S777(100); S779(100)]	11.07
High	ENSP00000312081.4	pep chromosome:GRCh38:11:67303530:67312592:1 gene:ENSG00000172830.13 transcript:ENST00000308127.9 gene_biotype:protein_coding transcript_biotype:protein_coding gene_symbol:SSH3 description:slingshot protein phosphatase 3 [Source:HGNC Symbol;Acc:HGNC:30581]	FALSE	TRUE	6.22155	2	10	2	High	High	High	High	Phospho [S87(86.4); S649(100)]	25.06
High	ENSP00000477720.2	pep chromosome:GRCh38:CHR_HSCHR5_1_CTG1_1:70070361:70092009:1 gene:ENSG00000273772.4 transcript:ENST00000612974.3 gene_biotype:protein_coding transcript_biotype:protein_coding gene_symbol:SMN2 description:survival of motor neuron 2, centromeric [Source:HGNC Symbol;Acc:HGNC:11118]	FALSE	TRUE	6.46259	2	10	2	High	High	High	High	Phospho [S31(98.7)]	18.17
High	ENSP00000216455.4	pep chromosome:GRCh38:14:58244843:58272004:1 gene:ENSG00000100567.13 transcript:ENST00000216455.9 gene_biotype:protein_coding transcript_biotype:protein_coding gene_symbol:PSMA3 description:proteasome subunit alpha 3 [Source:HGNC Symbol;Acc:HGNC:9532]	FALSE	TRUE	5.4902	1	17	1	High	High	High	High	Phospho [S250(100)]	31.36
High	ENSP00000473469.1	pep chromosome:GRCh38:9:19230435:19372598:1 gene:ENSG00000137145.20 transcript:ENST00000434457.6 gene_biotype:protein_coding transcript_biotype:protein_coding gene_symbol:DENND4C description:DENN domain containing 4C [Source:HGNC Symbol;Acc:HGNC:26079]	FALSE	TRUE	3.1665	4	8	4	High	High	High	High	Phospho [S1048(77.8); S1233(99.5)]	11.23
High	ENSP00000317123.5	pep chromosome:GRCh38:2:96274338:96305546:-1 gene:ENSG00000144028.15 transcript:ENST00000323853.10 gene_biotype:protein_coding transcript_biotype:protein_coding gene_symbol:SNRNP200 description:small nuclear ribonucleoprotein U5 subunit 200 [Source:HGNC Symbol;Acc:HGNC:30859]	FALSE	TRUE	1.17041	2	3	2	High	High	High	High	Phospho [S225(100); S2133(100)]	10.37
High	ENSP00000359991.4	pep chromosome:GRCh38:10:97426191:97433444:1 gene:ENSG00000171314.9 transcript:ENST00000334828.6 gene_biotype:protein_coding transcript_biotype:protein_coding gene_symbol:PGAM1 description:phosphoglycerate mutase 1 [Source:HGNC Symbol;Acc:HGNC:8888]	FALSE	TRUE	21.6535	4	4	4	High	High	High	High	Phospho [S14(100); S118(91.6)]	14.16
High	ENSP00000419060.2	pep chromosome:GRCh38:7:140719327:140924810:-1 gene:ENSG00000157764.13 transcript:ENST00000496384.7 gene_biotype:protein_coding transcript_biotype:protein_coding gene_symbol:BRAF description:B-Raf proto-oncogene, serine/threonine kinase [Source:HGNC Symbol;Acc:HGNC:1097]	FALSE	TRUE	8.08344	4	6	4	High	High	High	High	Phospho [T401(100); S429(86.5); S446(99.7); S729(99.3)]	9.91
High	ENSP00000385812.1	pep chromosome:GRCh38:22:36510899:36528897:-1 gene:ENSG00000100353.18 transcript:ENST00000405442.5 gene_biotype:protein_coding transcript_biotype:protein_coding gene_symbol:EIF3D description:eukaryotic translation initiation factor 3 subunit D [Source:HGNC Symbol;Acc:HGNC:3278]	FALSE	TRUE	6.75182	2	11	2	High	High	High	High	Phospho [S161(99.7)]	32.7
High	ENSP00000300177.4	pep chromosome:GRCh38:CHR_HSCHR15_4_CTG8:32798311:32814964:1 gene:ENSG00000276886.4 transcript:ENST00000300177.8 gene_biotype:protein_coding transcript_biotype:protein_coding gene_symbol:GREM1 description:gremlin 1, DAN family BMP antagonist [Source:HGNC Symbol;Acc:HGNC:2001]	FALSE	TRUE	21.7391	2	6	2	High	High	High	High	Phospho [S44(100); S77(90)]	24.12
High	ENSP00000284320.5	pep chromosome:GRCh38:3:100363431:100401089:-1 gene:ENSG00000154174.8 transcript:ENST00000284320.6 gene_biotype:protein_coding transcript_biotype:protein_coding gene_symbol:TOMM70 description:translocase of outer mitochondrial membrane 70 [Source:HGNC Symbol;Acc:HGNC:11985]	FALSE	TRUE	3.94737	1	3	1	High	High	High	High	Phospho [S91(100)]	11.13
High	ENSP00000413697.1	pep chromosome:GRCh38:22:35299804:35347992:1 gene:ENSG00000100284.21 transcript:ENST00000411850.5 gene_biotype:protein_coding transcript_biotype:protein_coding gene_symbol:TOM1 description:target of myb1 membrane trafficking protein [Source:HGNC Symbol;Acc:HGNC:11982]	FALSE	TRUE	8.31643	3	5	3	High	High	High	High	Phospho [S355(100); S375(91.7); S462(93.1)]	11.12
High	ENSP00000462729.1	pep chromosome:GRCh38:1:149937812:150010726:-1 gene:ENSG00000264522.6 transcript:ENST00000581312.6 gene_biotype:protein_coding transcript_biotype:protein_coding gene_symbol:OTUD7B description:OTU deubiquitinase 7B [Source:HGNC Symbol;Acc:HGNC:16683]	FALSE	TRUE	3.55872	2	5	2	High	High	High	High	Phospho [S464(100); S467(100); S508(100)]	17.82
High	ENSP00000273130.4	pep chromosome:GRCh38:3:32525974:32570858:-1 gene:ENSG00000144635.9 transcript:ENST00000273130.9 gene_biotype:protein_coding transcript_biotype:protein_coding gene_symbol:DYNC1LI1 description:dynein cytoplasmic 1 light intermediate chain 1 [Source:HGNC Symbol;Acc:HGNC:18745]	FALSE	TRUE	7.26577	3	10	3	High	High	High	High	Phospho [S207(100); S510(98.8)]	22.7
High	ENSP00000357866.1	pep chromosome:GRCh38:1:151292479:151327419:-1 gene:ENSG00000143393.16 transcript:ENST00000368872.5 gene_biotype:protein_coding transcript_biotype:protein_coding gene_symbol:PI4KB description:phosphatidylinositol 4-kinase beta [Source:HGNC Symbol;Acc:HGNC:8984]	FALSE	TRUE	5.49313	4	6	4	High	High	High	High	Phospho [S294(92.2); S413(100); S496(100)]	14.47
High	ENSP00000442718.2	pep chromosome:GRCh38:12:122980060:122982913:1 gene:ENSG00000182196.13 transcript:ENST00000543566.5 gene_biotype:protein_coding transcript_biotype:protein_coding gene_symbol:ARL6IP4 description:ADP ribosylation factor like GTPase 6 interacting protein 4 [Source:HGNC Symbol;Acc:HGNC:18076]	FALSE	TRUE	6.46766	2	6	2	High	High	High	High	Phospho [S313(100)]	9.73
High	ENSP00000275884.6	pep chromosome:GRCh38:7:140518420:140640776:-1 gene:ENSG00000146966.13 transcript:ENST00000275884.10 gene_biotype:protein_coding transcript_biotype:protein_coding gene_symbol:DENND2A description:DENN domain containing 2A [Source:HGNC Symbol;Acc:HGNC:22212]	FALSE	TRUE	5.84737	4	5	4	High	High	High	High	Phospho [S85(100); S334(98.9); T363(99.7); S404(86.8)]	11.65
High	ENSP00000357625.5	pep chromosome:GRCh38:10:131966455:131982013:-1 gene:ENSG00000176171.11 transcript:ENST00000368636.8 gene_biotype:protein_coding transcript_biotype:protein_coding gene_symbol:BNIP3 description:BCL2 interacting protein 3 [Source:HGNC Symbol;Acc:HGNC:1084]	FALSE	TRUE	16.2162	5	7	5	High	High	High	High	Phospho [S131(100); T137(93.5); S151(100); S160(99.9)]	15.51
High	ENSP00000360497.2	pep chromosome:GRCh38:X:119870475:119871733:-1 gene:ENSG00000125352.6 transcript:ENST00000371442.4 gene_biotype:protein_coding transcript_biotype:protein_coding gene_symbol:RNF113A description:ring finger protein 113A [Source:HGNC Symbol;Acc:HGNC:12974]	FALSE	TRUE	13.1195	2	6	2	High	High	High	High	Phospho [S84(100); S85(100); S253(100)]	25.57
High	ENSP00000500453.1	pep chromosome:GRCh38:1:10032832:10181239:1 gene:ENSG00000130939.20 transcript:ENST00000672724.1 gene_biotype:protein_coding transcript_biotype:protein_coding gene_symbol:UBE4B description:ubiquitination factor E4B [Source:HGNC Symbol;Acc:HGNC:12500]	FALSE	TRUE	4.58241	3	4	3	High	High	High	High	Phospho [S88(97.6); S105(95.3); S124(100)]	11.04
High	ENSP00000406367.2	pep chromosome:GRCh38:8:37796883:37844896:1 gene:ENSG00000020181.18 transcript:ENST00000412232.3 gene_biotype:protein_coding transcript_biotype:protein_coding gene_symbol:ADGRA2 description:adhesion G protein-coupled receptor A2 [Source:HGNC Symbol;Acc:HGNC:17849]	FALSE	TRUE	3.51271	3	4	3	High	High	High	High	Phospho [S966(100); S1088(100); S1107(100)]	12.57
High	ENSP00000484285.1	pep chromosome:GRCh38:10:49819334:49941985:-1 gene:ENSG00000227345.8 transcript:ENST00000616448.1 gene_biotype:protein_coding transcript_biotype:protein_coding gene_symbol:PARG description:poly(ADP-ribose) glycohydrolase [Source:HGNC Symbol;Acc:HGNC:8605]	FALSE	TRUE	6.45492	3	5	3	High	High	High	High	Phospho [T139(87.4); S302(98.2); S316(99.7)]	15.72
High	ENSP00000369500.3	pep chromosome:GRCh38:X:16719612:16765340:1 gene:ENSG00000169895.6 transcript:ENST00000380155.4 gene_biotype:protein_coding transcript_biotype:protein_coding gene_symbol:SYAP1 description:synapse associated protein 1 [Source:HGNC Symbol;Acc:HGNC:16273]	FALSE	TRUE	15.0568	2	5	2	High	High	High	High	Phospho [T248(100); S269(97.5)]	7.55
High	ENSP00000496327.1	pep chromosome:GRCh38:11:70272228:70385312:1 gene:ENSG00000131626.18 transcript:ENST00000644155.1 gene_biotype:protein_coding transcript_biotype:protein_coding gene_symbol:PPFIA1 description:PTPRF interacting protein alpha 1 [Source:HGNC Symbol;Acc:HGNC:9245]	FALSE	TRUE	3.02288	3	8	3	High	High	High	High	Phospho [S224(100); S226(100); S733(99.5); S737(99.5); S755(100)]	14.82
High	ENSP00000312222.4	pep chromosome:GRCh38:20:41178448:41300078:-1 gene:ENSG00000174306.21 transcript:ENST00000309060.7 gene_biotype:protein_coding transcript_biotype:protein_coding gene_symbol:ZHX3 description:zinc fingers and homeoboxes 3 [Source:HGNC Symbol;Acc:HGNC:15935]	FALSE	TRUE	6.79916	3	3	3	High	High	High	High	Phospho [S680(100); S929(92.2); S946(99.7)]	11.47
High	ENSP00000349977.5	pep chromosome:GRCh38:16:29820462:29848021:1 gene:ENSG00000013364.19 transcript:ENST00000357402.10 gene_biotype:protein_coding transcript_biotype:protein_coding gene_symbol:MVP description:major vault protein [Source:HGNC Symbol;Acc:HGNC:7531]	FALSE	TRUE	6.60694	3	3	3	High	High	High	High	Phospho [S873(84.5)]	11.94
High	ENSP00000351052.4	pep chromosome:GRCh38:7:130018286:130051451:-1 gene:ENSG00000091732.16 transcript:ENST00000358303.8 gene_biotype:protein_coding transcript_biotype:protein_coding gene_symbol:ZC3HC1 description:zinc finger C3HC-type containing 1 [Source:HGNC Symbol;Acc:HGNC:29913]	FALSE	TRUE	12.749	5	8	5	High	High	High	High	Phospho [S321(100); S344(99.2); S394(91.9); S407(91.3)]	14.26
High	ENSP00000335321.5	pep chromosome:GRCh38:2:197389784:197435091:-1 gene:ENSG00000115524.16 transcript:ENST00000335508.10 gene_biotype:protein_coding transcript_biotype:protein_coding gene_symbol:SF3B1 description:splicing factor 3b subunit 1 [Source:HGNC Symbol;Acc:HGNC:10768]	FALSE	TRUE	3.37423	3	6	3	High	High	High	High	Phospho [S129(100); T244(93.6); T326(92)]	9.2
High	ENSP00000290291.6	pep chromosome:GRCh38:20:62804835:62814000:1 gene:ENSG00000060491.16 transcript:ENST00000290291.10 gene_biotype:protein_coding transcript_biotype:protein_coding gene_symbol:OGFR description:opioid growth factor receptor [Source:HGNC Symbol;Acc:HGNC:15768]	FALSE	TRUE	7.68095	3	6	3	High	High	High	High	Phospho [S315(100); S349(100); S378(100)]	16.47
High	ENSP00000426948.1	pep chromosome:GRCh38:5:131425891:131796983:-1 gene:ENSG00000273217.1 transcript:ENST00000514667.1 gene_biotype:protein_coding transcript_biotype:protein_coding gene_symbol:AC008695.1 description:novel protein	FALSE	TRUE	3.33131	4	5	4	High	High	High	High	Phospho [S280(100); S1640(97.7)]	13.79
High	ENSP00000360798.3	pep chromosome:GRCh38:1:51354263:51519266:-1 gene:ENSG00000085832.17 transcript:ENST00000371733.8 gene_biotype:protein_coding transcript_biotype:protein_coding gene_symbol:EPS15 description:epidermal growth factor receptor pathway substrate 15 [Source:HGNC Symbol;Acc:HGNC:3419]	FALSE	TRUE	7.14286	4	6	4	High	High	High	High	Phospho [S323(100); S563(86.9); T779(89.2); S796(100)]	10.51
High	ENSP00000358142.3	pep chromosome:GRCh38:1:149903318:149917844:-1 gene:ENSG00000159164.10 transcript:ENST00000369146.8 gene_biotype:protein_coding transcript_biotype:protein_coding gene_symbol:SV2A description:synaptic vesicle glycoprotein 2A [Source:HGNC Symbol;Acc:HGNC:20566]	FALSE	TRUE	6.60377	2	6	2	High	High	High	High	Phospho [S80(99.7); S81(100); S127(100)]	16.05
High	ENSP00000260970.3	pep chromosome:GRCh38:2:169584351:169641406:1 gene:ENSG00000138398.16 transcript:ENST00000260970.8 gene_biotype:protein_coding transcript_biotype:protein_coding gene_symbol:PPIG description:peptidylprolyl isomerase G [Source:HGNC Symbol;Acc:HGNC:14650]	FALSE	TRUE	6.76393	6	8	6	High	High	High	High	Phospho [S413(100); S415(100); S687(99.8); S696(99.8); S744(100); S745(100); T748(99)]	9.52
High	ENSP00000497575.1	pep chromosome:GRCh38:6:69675899:69796906:-1 gene:ENSG00000168216.13 transcript:ENST00000649011.1 gene_biotype:protein_coding transcript_biotype:protein_coding gene_symbol:LMBRD1 description:LMBR1 domain containing 1 [Source:HGNC Symbol;Acc:HGNC:23038]	FALSE	TRUE	4.09253	2	4	2	High	High	High	High	Phospho [S550(100); S553(100)]	16.59
High	ENSP00000381461.4	pep chromosome:GRCh38:11:74171322:74254703:1 gene:ENSG00000214517.10 transcript:ENST00000398427.6 gene_biotype:protein_coding transcript_biotype:protein_coding gene_symbol:PPME1 description:protein phosphatase methylesterase 1 [Source:HGNC Symbol;Acc:HGNC:30178]	FALSE	TRUE	8.5	2	4	2	High	High	High	High	Phospho [S243(100)]	11.02
High	ENSP00000338885.3	pep chromosome:GRCh38:11:119107383:119118544:1 gene:ENSG00000172375.13 transcript:ENST00000336702.7 gene_biotype:protein_coding transcript_biotype:protein_coding gene_symbol:C2CD2L description:C2CD2 like [Source:HGNC Symbol;Acc:HGNC:29000]	FALSE	TRUE	6.50636	2	5	2	High	High	High	High	Phospho [S620(99.6); T622(87.5); S663(91.8)]	16.55
High	ENSP00000401177.2	pep chromosome:GRCh38:9:92297358:92325350:-1 gene:ENSG00000198000.12 transcript:ENST00000442668.7 gene_biotype:protein_coding transcript_biotype:protein_coding gene_symbol:NOL8 description:nucleolar protein 8 [Source:HGNC Symbol;Acc:HGNC:23387]	FALSE	TRUE	5.39846	4	6	4	High	High	High	High	Phospho [S365(87.3); S378(98.6); T381(100); T888(100); S890(100); S1082(100); S1083(100); S1084(100)]	19.2
High	ENSP00000349305.4	pep chromosome:GRCh38:3:37243252:37366745:1 gene:ENSG00000144674.16 transcript:ENST00000356847.8 gene_biotype:protein_coding transcript_biotype:protein_coding gene_symbol:GOLGA4 description:golgin A4 [Source:HGNC Symbol;Acc:HGNC:4427]	FALSE	TRUE	2.31832	4	10	4	High	High	High	High	Phospho [S41(92.5); S93(99.2); S288(100)]	18.92
High	ENSP00000432016.1	pep chromosome:GRCh38:5:140401908:140549569:1 gene:ENSG00000254996.5 transcript:ENST00000532219.5 gene_biotype:protein_coding transcript_biotype:protein_coding gene_symbol:ANKHD1-EIF4EBP3 description:ANKHD1-EIF4EBP3 readthrough [Source:HGNC Symbol;Acc:HGNC:33530]	FALSE	TRUE	1.03172	1	3	1	High	High	High	High	Phospho [S1591(92.4)]	12.04
High	ENSP00000371638.1	pep chromosome:GRCh38:9:2021945:2193624:1 gene:ENSG00000080503.24 transcript:ENST00000382203.5 gene_biotype:protein_coding transcript_biotype:protein_coding gene_symbol:SMARCA2 description:SWI/SNF related, matrix associated, actin dependent regulator of chromatin, subfamily a, member 2 [Source:HGNC Symbol;Acc:HGNC:11098]	FALSE	TRUE	2.83019	2	3	2	High	High	High	High	Phospho [S1512(100); S1516(100); S1568(100); S1572(100)]	11.53
High	ENSP00000375836.1	pep chromosome:GRCh38:2:241227264:241272886:-1 gene:ENSG00000115677.17 transcript:ENST00000391975.5 gene_biotype:protein_coding transcript_biotype:protein_coding gene_symbol:HDLBP description:high density lipoprotein binding protein [Source:HGNC Symbol;Acc:HGNC:4857]	FALSE	TRUE	1.89274	2	6	2	High	High	High	High	Phospho [S944(100)]	15.8
High	ENSP00000346797.4	pep chromosome:GRCh38:9:136331983:136359605:1 gene:ENSG00000160360.13 transcript:ENST00000354753.7 gene_biotype:protein_coding transcript_biotype:protein_coding gene_symbol:GPSM1 description:G protein signaling modulator 1 [Source:HGNC Symbol;Acc:HGNC:17858]	FALSE	TRUE	7.49646	3	6	3	High	High	High	High	Phospho [S503(100); S577(88.2)]	14.26
High	ENSP00000222345.4	pep chromosome:GRCh38:19:37907208:38208369:1 gene:ENSG00000105738.11 transcript:ENST00000222345.11 gene_biotype:protein_coding transcript_biotype:protein_coding gene_symbol:SIPA1L3 description:signal induced proliferation associated 1 like 3 [Source:HGNC Symbol;Acc:HGNC:23801]	FALSE	TRUE	3.2566	4	8	4	High	High	High	High	Phospho [S100(94.2); S1534(97.1); T1705(85.8)]	13.07
High	ENSP00000254803.2	pep chromosome:GRCh38:4:70688532:70690551:1 gene:ENSG00000132467.4 transcript:ENST00000254803.4 gene_biotype:protein_coding transcript_biotype:protein_coding gene_symbol:UTP3 description:UTP3 small subunit processome component [Source:HGNC Symbol;Acc:HGNC:24477]	FALSE	TRUE	4.17537	1	2	1	High	High	High	High	Phospho [S368(100)]	13.44
High	ENSP00000485350.1	pep chromosome:GRCh38:2:69457997:69509280:-1 gene:ENSG00000115977.19 transcript:ENST00000606389.5 gene_biotype:protein_coding transcript_biotype:protein_coding gene_symbol:AAK1 description:AP2 associated kinase 1 [Source:HGNC Symbol;Acc:HGNC:19679]	FALSE	TRUE	6.06654	3	17	1	High	High	High	High	Phospho [S26(100); S249(100)]	20.04
High	ENSP00000280154.7	pep chromosome:GRCh38:10:110871928:110900006:1 gene:ENSG00000150593.18 transcript:ENST00000280154.12 gene_biotype:protein_coding transcript_biotype:protein_coding gene_symbol:PDCD4 description:programmed cell death 4 [Source:HGNC Symbol;Acc:HGNC:8763]	FALSE	TRUE	7.67591	4	5	4	High	High	High	High	Phospho [S76(91.1); S94(100); S457(100)]	8.75
High	ENSP00000481721.1	pep chromosome:GRCh38:9:98199011:98255649:-1 gene:ENSG00000095383.20 transcript:ENST00000465784.7 gene_biotype:protein_coding transcript_biotype:protein_coding gene_symbol:TBC1D2 description:TBC1 domain family member 2 [Source:HGNC Symbol;Acc:HGNC:18026]	FALSE	TRUE	1.8319	2	5	2	High	High	High	High	Phospho [S920(100)]	19.15
High	ENSP00000377298.3	pep chromosome:GRCh38:11:72002864:72080687:-1 gene:ENSG00000137497.17 transcript:ENST00000393695.7 gene_biotype:protein_coding transcript_biotype:protein_coding gene_symbol:NUMA1 description:nuclear mitotic apparatus protein 1 [Source:HGNC Symbol;Acc:HGNC:8059]	FALSE	TRUE	2.7896	3	6	3	High	High	High	High	Phospho [S169(99.9); S1225(99.3); S1757(99.1)]	14.58
High	ENSP00000331342.4	pep chromosome:GRCh38:8:37858618:37899497:-1 gene:ENSG00000156675.16 transcript:ENST00000330843.9 gene_biotype:protein_coding transcript_biotype:protein_coding gene_symbol:RAB11FIP1 description:RAB11 family interacting protein 1 [Source:HGNC Symbol;Acc:HGNC:30265]	FALSE	TRUE	3.27358	3	12	3	High	High	High	High	Phospho [S199(91.5); S345(99.2)]	23.33
High	ENSP00000381693.2	pep chromosome:GRCh38:10:73785624:73801797:1 gene:ENSG00000214655.10 transcript:ENST00000398706.6 gene_biotype:protein_coding transcript_biotype:protein_coding gene_symbol:ZSWIM8 description:zinc finger SWIM-type containing 8 [Source:HGNC Symbol;Acc:HGNC:23528]	FALSE	TRUE	1.68295	3	3	3	High	High	High	High	Phospho [S53(98.8); S567(100)]	10.08
High	ENSP00000278412.2	pep chromosome:GRCh38:11:57325988:57335892:-1 gene:ENSG00000149136.9 transcript:ENST00000278412.7 gene_biotype:protein_coding transcript_biotype:protein_coding gene_symbol:SSRP1 description:structure specific recognition protein 1 [Source:HGNC Symbol;Acc:HGNC:11327]	FALSE	TRUE	3.38505	1	4	1	High	High	High	High	Phospho [S444(100)]	24.8
High	ENSP00000411532.1	pep chromosome:GRCh38:17:40388525:40417896:-1 gene:ENSG00000131747.15 transcript:ENST00000423485.6 gene_biotype:protein_coding transcript_biotype:protein_coding gene_symbol:TOP2A description:DNA topoisomerase II alpha [Source:HGNC Symbol;Acc:HGNC:11989]	FALSE	TRUE	3.59242	3	5	3	High	High	High	High	Phospho [S1106(100); S1525(100)]	10.12
High	ENSP00000407509.2	pep chromosome:GRCh38:19:7534750:7561761:1 gene:ENSG00000032444.16 transcript:ENST00000414982.7 gene_biotype:protein_coding transcript_biotype:protein_coding gene_symbol:PNPLA6 description:patatin like phospholipase domain containing 6 [Source:HGNC Symbol;Acc:HGNC:16268]	FALSE	TRUE	4	2	5	2	High	High	High	High	Phospho [S1339(100)]	15.86
High	ENSP00000263026.5	pep chromosome:GRCh38:16:22206278:22288738:1 gene:ENSG00000103319.12 transcript:ENST00000263026.10 gene_biotype:protein_coding transcript_biotype:protein_coding gene_symbol:EEF2K description:eukaryotic elongation factor 2 kinase [Source:HGNC Symbol;Acc:HGNC:24615]	FALSE	TRUE	3.86207	2	4	2	High	High	High	High	Phospho [S445(99.6); S470(100); S474(100)]	9.24
High	ENSP00000247026.5	pep chromosome:GRCh38:17:30116816:30186475:1 gene:ENSG00000126653.18 transcript:ENST00000247026.10 gene_biotype:protein_coding transcript_biotype:protein_coding gene_symbol:NSRP1 description:nuclear speckle splicing regulatory protein 1 [Source:HGNC Symbol;Acc:HGNC:25305]	FALSE	TRUE	4.48029	2	4	2	High	High	High	High	Phospho [S248(100); S254(99.8); S255(99.8)]	17.31
High	ENSP00000382091.4	pep chromosome:GRCh38:17:18183828:18209954:1 gene:ENSG00000091542.9 transcript:ENST00000399138.5 gene_biotype:protein_coding transcript_biotype:protein_coding gene_symbol:ALKBH5 description:alkB homolog 5, RNA demethylase [Source:HGNC Symbol;Acc:HGNC:25996]	FALSE	TRUE	10.6599	3	3	3	High	High	High	High	Phospho [S64(100); S384(100)]	7.97
High	ENSP00000436786.1	pep chromosome:GRCh38:11:118436492:118526832:1 gene:ENSG00000118058.22 transcript:ENST00000534358.7 gene_biotype:protein_coding transcript_biotype:protein_coding gene_symbol:KMT2A description:lysine methyltransferase 2A [Source:HGNC Symbol;Acc:HGNC:7132]	FALSE	TRUE	1.0574	2	3	2	High	High	High	High	Phospho [S142(91.1); S153(100)]	11.04
High	ENSP00000365016.3	pep chromosome:GRCh38:13:109752695:109786583:-1 gene:ENSG00000185950.9 transcript:ENST00000375856.5 gene_biotype:protein_coding transcript_biotype:protein_coding gene_symbol:IRS2 description:insulin receptor substrate 2 [Source:HGNC Symbol;Acc:HGNC:6126]	FALSE	TRUE	4.70852	4	5	4	High	High	High	High	Phospho [T350(100); S518(85.6); S731(90); S736(90); S1203(98.9)]	9.34
High	ENSP00000499052.1	pep chromosome:GRCh38:22:24270837:24417206:1 gene:ENSG00000100014.20 transcript:ENST00000651059.1 gene_biotype:protein_coding transcript_biotype:protein_coding gene_symbol:SPECC1L description:sperm antigen with calponin homology and coiled-coil domains 1 like [Source:HGNC Symbol;Acc:HGNC:29022]	FALSE	TRUE	4.0493	3	6	3	High	High	High	High	Phospho [S239(100); S403(100); S404(100); S408(97.7)]	12.95
High	ENSP00000317714.3	pep chromosome:GRCh38:16:31033558:31040164:1 gene:ENSG00000103496.15 transcript:ENST00000313843.8 gene_biotype:protein_coding transcript_biotype:protein_coding gene_symbol:STX4 description:syntaxin 4 [Source:HGNC Symbol;Acc:HGNC:11439]	FALSE	TRUE	10.7744	2	8	2	High	High	High	High	Phospho [S14(100); S15(100); S117(99)]	18
High	ENSP00000263997.5	pep chromosome:GRCh38:16:68298034:68310946:-1 gene:ENSG00000103061.13 transcript:ENST00000263997.11 gene_biotype:protein_coding transcript_biotype:protein_coding gene_symbol:SLC7A6OS description:solute carrier family 7 member 6 opposite strand [Source:HGNC Symbol;Acc:HGNC:25807]	FALSE	TRUE	13.5922	3	5	3	High	High	High	High	Phospho [S259(92.7); Y271(83); S302(99.4); S308(100)]	12.51
High	ENSP00000322915.6	pep chromosome:GRCh38:1:35268709:35422058:1 gene:ENSG00000146463.12 transcript:ENST00000314607.11 gene_biotype:protein_coding transcript_biotype:protein_coding gene_symbol:ZMYM4 description:zinc finger MYM-type containing 4 [Source:HGNC Symbol;Acc:HGNC:13055]	FALSE	TRUE	1.55039	3	7	3	High	High	High	High	Phospho [S1241(99.5); S1542(100); S1547(100)]	11.97
High	ENSP00000498100.1	pep chromosome:GRCh38:14:99792648:99942014:1 gene:ENSG00000066629.17 transcript:ENST00000649352.1 gene_biotype:protein_coding transcript_biotype:protein_coding gene_symbol:EML1 description:EMAP like 1 [Source:HGNC Symbol;Acc:HGNC:3330]	FALSE	TRUE	4.40476	5	11	5	High	High	High	High	Phospho [S119(93.3); S165(100); S185(90.3)]	17.7
High	ENSP00000418385.1	pep chromosome:GRCh38:7:139045916:139109354:-1 gene:ENSG00000105939.13 transcript:ENST00000464606.5 gene_biotype:protein_coding transcript_biotype:protein_coding gene_symbol:ZC3HAV1 description:zinc finger CCCH-type containing, antiviral 1 [Source:HGNC Symbol;Acc:HGNC:23721]	FALSE	TRUE	3.51562	3	6	3	High	High	High	High	Phospho [S275(96.7); S284(99.9); S378(91.2)]	11.18
High	ENSP00000347184.5	pep chromosome:GRCh38:4:3074681:3243960:1 gene:ENSG00000197386.12 transcript:ENST00000355072.10 gene_biotype:protein_coding transcript_biotype:protein_coding gene_symbol:HTT description:huntingtin [Source:HGNC Symbol;Acc:HGNC:4851]	FALSE	TRUE	1.52769	3	5	3	High	High	High	High	Phospho [S432(100); S640(100)]	14.28
High	ENSP00000294618.6	pep chromosome:GRCh38:19:11199295:11262524:-1 gene:ENSG00000130158.14 transcript:ENST00000294618.12 gene_biotype:protein_coding transcript_biotype:protein_coding gene_symbol:DOCK6 description:dedicator of cytokinesis 6 [Source:HGNC Symbol;Acc:HGNC:19189]	FALSE	TRUE	2.14949	4	9	4	High	High	High	High	Phospho [S32(100); S878(88.9); S883(90.1); S1343(100)]	13.1
High	ENSP00000426632.1	pep chromosome:GRCh38:5:65926773:66078565:1 gene:ENSG00000112851.14 transcript:ENST00000506030.5 gene_biotype:protein_coding transcript_biotype:protein_coding gene_symbol:ERBIN description:erbb2 interacting protein [Source:HGNC Symbol;Acc:HGNC:15842]	FALSE	TRUE	4.72163	4	8	4	High	High	High	High	Phospho [S602(100); S603(100); S1015(99.7); S1081(80.2); S1082(80.2)]	20.68
High	ENSP00000355464.1	pep chromosome:GRCh38:1:246839098:246931363:-1 gene:ENSG00000153207.15 transcript:ENST00000366508.5 gene_biotype:protein_coding transcript_biotype:protein_coding gene_symbol:AHCTF1 description:AT-hook containing transcription factor 1 [Source:HGNC Symbol;Acc:HGNC:24618]	FALSE	TRUE	1.56454	3	5	3	High	High	High	High	Phospho [S1257(100); S1568(100); S1979(100)]	10.41
High	ENSP00000493885.1	pep chromosome:GRCh38:CHR_HG1_PATCH:24366910:24379603:1 gene:ENSG00000285485.2 transcript:ENST00000644376.1 gene_biotype:protein_coding transcript_biotype:protein_coding gene_symbol:NFATC4 description:nuclear factor of activated T cells 4 [Source:HGNC Symbol;Acc:HGNC:7778]	FALSE	TRUE	7.57261	4	8	4	High	High	High	High	Phospho [T187(92.7); S336(84.2); S358(90.4)]	14.35
High	ENSP00000443988.1	pep chromosome:GRCh38:12:118376555:118418033:1 gene:ENSG00000111707.12 transcript:ENST00000543473.2 gene_biotype:protein_coding transcript_biotype:protein_coding gene_symbol:SUDS3 description:SDS3 homolog, SIN3A corepressor complex component [Source:HGNC Symbol;Acc:HGNC:29545]	FALSE	TRUE	15.2439	3	4	3	High	High	High	High	Phospho [S45(100); T49(100); T55(100)]	14.67
High	ENSP00000484981.1	pep chromosome:GRCh38:14:31100118:31207317:-1 gene:ENSG00000092148.13 transcript:ENST00000611816.4 gene_biotype:protein_coding transcript_biotype:protein_coding gene_symbol:HECTD1 description:HECT domain E3 ubiquitin protein ligase 1 [Source:HGNC Symbol;Acc:HGNC:20157]	FALSE	TRUE	2.71614	4	12	4	High	High	High	High	Phospho [S357(95.7); S631(85.6); S1575(79.1)]	11.82
High	ENSP00000359665.3	pep chromosome:GRCh38:10:97640686:97676434:1 gene:ENSG00000155252.13 transcript:ENST00000370631.3 gene_biotype:protein_coding transcript_biotype:protein_coding gene_symbol:PI4K2A description:phosphatidylinositol 4-kinase type 2 alpha [Source:HGNC Symbol;Acc:HGNC:30031]	FALSE	TRUE	7.09812	3	8	3	High	High	High	High	Phospho [S44(99.8); S51(100); S462(100)]	16.26
High	ENSP00000365837.3	pep chromosome:GRCh38:12:131929276:131945896:1 gene:ENSG00000177192.14 transcript:ENST00000376649.8 gene_biotype:protein_coding transcript_biotype:protein_coding gene_symbol:PUS1 description:pseudouridine synthase 1 [Source:HGNC Symbol;Acc:HGNC:15508]	FALSE	TRUE	3.51288	1	4	1	High	High	High	High	Phospho [T426(100)]	14.33
High	ENSP00000222329.3	pep chromosome:GRCh38:19:42247569:42255128:-1 gene:ENSG00000105722.10 transcript:ENST00000222329.9 gene_biotype:protein_coding transcript_biotype:protein_coding gene_symbol:ERF description:ETS2 repressor factor [Source:HGNC Symbol;Acc:HGNC:3444]	FALSE	TRUE	6.56934	2	4	2	High	High	High	High	Phospho [S185(93.2); T526(100)]	12.54
High	ENSP00000234170.5	pep chromosome:GRCh38:2:37201612:37231596:-1 gene:ENSG00000115816.15 transcript:ENST00000234170.10 gene_biotype:protein_coding transcript_biotype:protein_coding gene_symbol:CEBPZ description:CCAAT enhancer binding protein zeta [Source:HGNC Symbol;Acc:HGNC:24218]	FALSE	TRUE	2.46679	1	3	1	High	High	High	High	Phospho [S629(100)]	19.32
High	ENSP00000375863.2	pep chromosome:GRCh38:19:41264372:41307787:1 gene:ENSG00000105323.17 transcript:ENST00000392006.8 gene_biotype:protein_coding transcript_biotype:protein_coding gene_symbol:HNRNPUL1 description:heterogeneous nuclear ribonucleoprotein U like 1 [Source:HGNC Symbol;Acc:HGNC:17011]	FALSE	TRUE	7.35981	2	5	2	High	High	High	High	Phospho [S194(100); S716(79.7)]	8.85
High	ENSP00000306822.3	pep chromosome:GRCh38:15:33866227:34039204:-1 gene:ENSG00000169857.8 transcript:ENST00000306730.8 gene_biotype:protein_coding transcript_biotype:protein_coding gene_symbol:AVEN description:apoptosis and caspase activation inhibitor [Source:HGNC Symbol;Acc:HGNC:13509]	FALSE	TRUE	12.1547	3	4	3	High	High	High	High	Phospho [S94(99.7); S261(100)]	11.55
High	ENSP00000352185.4	pep chromosome:GRCh38:9:93576584:93679587:1 gene:ENSG00000197724.11 transcript:ENST00000359246.9 gene_biotype:protein_coding transcript_biotype:protein_coding gene_symbol:PHF2 description:PHD finger protein 2 [Source:HGNC Symbol;Acc:HGNC:8920]	FALSE	TRUE	3.83212	3	3	3	High	High	High	High	Phospho [S625(100); S681(100); S882(100)]	9.11
High	ENSP00000025301.2	pep chromosome:GRCh38:13:42272152:42323261:1 gene:ENSG00000023516.9 transcript:ENST00000025301.4 gene_biotype:protein_coding transcript_biotype:protein_coding gene_symbol:AKAP11 description:A-kinase anchoring protein 11 [Source:HGNC Symbol;Acc:HGNC:369]	FALSE	TRUE	3.20884	4	10	4	High	High	High	High	Phospho [S448(98.9); T1104(81.5); S1171(91)]	14.44
High	ENSP00000362413.4	pep chromosome:GRCh38:X:78104248:78129295:1 gene:ENSG00000102144.15 transcript:ENST00000373316.5 gene_biotype:protein_coding transcript_biotype:protein_coding gene_symbol:PGK1 description:phosphoglycerate kinase 1 [Source:HGNC Symbol;Acc:HGNC:8896]	FALSE	TRUE	10.0719	4	5	4	High	High	High	High	Phospho [S203(100)]	13.58
High	ENSP00000459719.1	pep chromosome:GRCh38:19:42268537:42295796:1 gene:ENSG00000079432.7 transcript:ENST00000572681.6 gene_biotype:protein_coding transcript_biotype:protein_coding gene_symbol:CIC description:capicua transcriptional repressor [Source:HGNC Symbol;Acc:HGNC:14214]	FALSE	TRUE	2.70485	5	9	5	High	High	High	High	Phospho [S1340(100); S1345(89.9); S1405(100); S2153(98.6); S2308(100)]	15.17
High	ENSP00000477551.1	pep chromosome:GRCh38:6:2765432:2785744:1 gene:ENSG00000124535.16 transcript:ENST00000618555.4 gene_biotype:protein_coding transcript_biotype:protein_coding gene_symbol:WRNIP1 description:WRN helicase interacting protein 1 [Source:HGNC Symbol;Acc:HGNC:20876]	FALSE	TRUE	6.01504	2	3	2	High	High	High	High	Phospho [S91(100); S92(100); T116(100)]	12.62
High	ENSP00000259467.4	pep chromosome:GRCh38:9:122818097:122828588:-1 gene:ENSG00000136940.14 transcript:ENST00000259467.9 gene_biotype:protein_coding transcript_biotype:protein_coding gene_symbol:PDCL description:phosducin like [Source:HGNC Symbol;Acc:HGNC:8770]	FALSE	TRUE	11.6279	2	5	2	High	High	High	High	Phospho [S25(100); S296(100)]	8.52
High	ENSP00000483453.1	pep chromosome:GRCh38:17:37514807:37609418:-1 gene:ENSG00000275066.5 transcript:ENST00000612223.5 gene_biotype:protein_coding transcript_biotype:protein_coding gene_symbol:SYNRG description:synergin gamma [Source:HGNC Symbol;Acc:HGNC:557]	FALSE	TRUE	3.80518	4	6	4	High	High	High	High	Phospho [S752(100)]	11.07
High	ENSP00000491215.1	pep chromosome:GRCh38:1:244850297:244864543:-1 gene:ENSG00000153187.20 transcript:ENST00000640218.2 gene_biotype:protein_coding transcript_biotype:protein_coding gene_symbol:HNRNPU description:heterogeneous nuclear ribonucleoprotein U [Source:HGNC Symbol;Acc:HGNC:5048]	FALSE	TRUE	4.84848	2	14	2	High	High	High	High	Phospho [S271(100)]	56.55
High	ENSP00000361892.3	pep chromosome:GRCh38:20:44966512:45080021:1 gene:ENSG00000101109.12 transcript:ENST00000372806.8 gene_biotype:protein_coding transcript_biotype:protein_coding gene_symbol:STK4 description:serine/threonine kinase 4 [Source:HGNC Symbol;Acc:HGNC:11408]	FALSE	TRUE	4.51745	1	3	1	High	High	High	High	Phospho [S320(100)]	19.61
High	ENSP00000295809.7	pep chromosome:GRCh38:1:159009927:159055155:1 gene:ENSG00000163565.18 transcript:ENST00000295809.11 gene_biotype:protein_coding transcript_biotype:protein_coding gene_symbol:IFI16 description:interferon gamma inducible protein 16 [Source:HGNC Symbol;Acc:HGNC:5395]	FALSE	TRUE	4.84076	2	6	2	High	High	High	High	Phospho [S106(94.4); S153(99.9)]	15.57
High	ENSP00000302239.4	pep chromosome:GRCh38:15:50424405:50514421:1 gene:ENSG00000138592.14 transcript:ENST00000307179.9 gene_biotype:protein_coding transcript_biotype:protein_coding gene_symbol:USP8 description:ubiquitin specific peptidase 8 [Source:HGNC Symbol;Acc:HGNC:12631]	FALSE	TRUE	2.23614	3	11	3	High	High	High	High	Phospho [T577(100)]	11.25
High	ENSP00000378982.2	pep chromosome:GRCh38:17:19281955:19335194:1 gene:ENSG00000072134.15 transcript:ENST00000395620.6 gene_biotype:protein_coding transcript_biotype:protein_coding gene_symbol:EPN2 description:epsin 2 [Source:HGNC Symbol;Acc:HGNC:18639]	FALSE	TRUE	5.65068	2	6	2	High	High	High	High	Phospho [S192(100)]	13.83
High	ENSP00000221265.2	pep chromosome:GRCh38:19:39385629:39391106:-1 gene:ENSG00000006712.15 transcript:ENST00000221265.8 gene_biotype:protein_coding transcript_biotype:protein_coding gene_symbol:PAF1 description:PAF1 homolog, Paf1/RNA polymerase II complex component [Source:HGNC Symbol;Acc:HGNC:25459]	FALSE	TRUE	9.03955	3	3	3	High	High	High	High	Phospho [S394(100); S440(99.4); S460(88.6)]	11.88
High	ENSP00000467423.1	pep chromosome:GRCh38:19:5623083:5668478:1 gene:ENSG00000160633.13 transcript:ENST00000588852.2 gene_biotype:protein_coding transcript_biotype:protein_coding gene_symbol:SAFB description:scaffold attachment factor B [Source:HGNC Symbol;Acc:HGNC:10520]	FALSE	TRUE	7.63359	4	6	4	High	High	High	High	Phospho [S344(100); S383(100); S384(100); S594(100); S596(100)]	12.53
High	ENSP00000339191.2	pep chromosome:GRCh38:7:116525036:116561179:1 gene:ENSG00000105974.12 transcript:ENST00000341049.7 gene_biotype:protein_coding transcript_biotype:protein_coding gene_symbol:CAV1 description:caveolin 1 [Source:HGNC Symbol;Acc:HGNC:1527]	FALSE	TRUE	9.55056	2	9	2	High	High	High	High	Phospho [S37(100)]	16.32
High	ENSP00000319678.6	pep chromosome:GRCh38:11:8693352:8810674:-1 gene:ENSG00000166444.19 transcript:ENST00000313726.11 gene_biotype:protein_coding transcript_biotype:protein_coding gene_symbol:ST5 description:suppression of tumorigenicity 5 [Source:HGNC Symbol;Acc:HGNC:11350]	FALSE	TRUE	3.43008	2	10	2	High	High	High	High	Phospho [S233(92.6); T364(99.3); S368(84.3)]	12.77
High	ENSP00000487548.1	pep chromosome:GRCh38:2:232697305:232860575:1 gene:ENSG00000204120.14 transcript:ENST00000629305.2 gene_biotype:protein_coding transcript_biotype:protein_coding gene_symbol:GIGYF2 description:GRB10 interacting GYF protein 2 [Source:HGNC Symbol;Acc:HGNC:11960]	FALSE	TRUE	4.84481	3	7	3	High	High	High	High	Phospho [S26(98.7); S295(90.9); S406(89.3)]	11.59
High	ENSP00000394794.1	pep chromosome:GRCh38:4:86594315:86815171:1 gene:ENSG00000163629.13 transcript:ENST00000436978.5 gene_biotype:protein_coding transcript_biotype:protein_coding gene_symbol:PTPN13 description:protein tyrosine phosphatase non-receptor type 13 [Source:HGNC Symbol;Acc:HGNC:9646]	FALSE	TRUE	0.883534	1	2	1	High	High	High	High	Phospho [S1634(99.6)]	11.01
High	ENSP00000410242.2	pep chromosome:GRCh38:3:185643975:185825012:-1 gene:ENSG00000073792.15 transcript:ENST00000457616.6 gene_biotype:protein_coding transcript_biotype:protein_coding gene_symbol:IGF2BP2 description:insulin like growth factor 2 mRNA binding protein 2 [Source:HGNC Symbol;Acc:HGNC:28867]	FALSE	TRUE	2.80992	1	3	1	High	High	High	High	Phospho [S168(99.9)]	10.91
High	ENSP00000261211.3	pep chromosome:GRCh38:12:96278261:96400439:-1 gene:ENSG00000059758.8 transcript:ENST00000261211.8 gene_biotype:protein_coding transcript_biotype:protein_coding gene_symbol:CDK17 description:cyclin dependent kinase 17 [Source:HGNC Symbol;Acc:HGNC:8750]	FALSE	TRUE	7.26577	2	2	2	High	High	High	High	Phospho [S122(99.3); S180(99.8)]	9.52
High	ENSP00000354508.3	pep chromosome:GRCh38:6:56458968:56843153:-1 gene:ENSG00000151914.20 transcript:ENST00000361203.7 gene_biotype:protein_coding transcript_biotype:protein_coding gene_symbol:DST description:dystonin [Source:HGNC Symbol;Acc:HGNC:1090]	FALSE	TRUE	0.723764	3	6	2	High	High	High	High	Phospho [S2215(96.7); S2221(96.7); S2527(98.9); T2531(82.6); S3719(100)]	14.96
High	ENSP00000244763.4	pep chromosome:GRCh38:6:7281143:7313199:-1 gene:ENSG00000124783.14 transcript:ENST00000244763.9 gene_biotype:protein_coding transcript_biotype:protein_coding gene_symbol:SSR1 description:signal sequence receptor subunit 1 [Source:HGNC Symbol;Acc:HGNC:11323]	FALSE	TRUE	12.5874	2	6	2	High	High	High	High	Phospho [S268(100); S281(100)]	22.85
High	ENSP00000249014.4	pep chromosome:GRCh38:22:37560480:37569405:1 gene:ENSG00000128283.7 transcript:ENST00000249014.5 gene_biotype:protein_coding transcript_biotype:protein_coding gene_symbol:CDC42EP1 description:CDC42 effector protein 1 [Source:HGNC Symbol;Acc:HGNC:17014]	FALSE	TRUE	7.16113	3	11	3	High	High	High	High	Phospho [S195(91.6); S302(96.3); S350(100)]	31.41
High	ENSP00000280377.5	pep chromosome:GRCh38:12:62260404:62416389:1 gene:ENSG00000135655.16 transcript:ENST00000280377.10 gene_biotype:protein_coding transcript_biotype:protein_coding gene_symbol:USP15 description:ubiquitin specific peptidase 15 [Source:HGNC Symbol;Acc:HGNC:12613]	FALSE	TRUE	3.26198	1	5	1	High	High	High	High	Phospho [S961(99.8)]	21.69
High	ENSP00000310723.2	pep chromosome:GRCh38:12:48829756:48852163:-1 gene:ENSG00000174243.10 transcript:ENST00000308025.8 gene_biotype:protein_coding transcript_biotype:protein_coding gene_symbol:DDX23 description:DEAD-box helicase 23 [Source:HGNC Symbol;Acc:HGNC:17347]	FALSE	TRUE	3.29268	6	9	6	High	High	High	High	Phospho [S14(95.8); S23(100); T25(100); S107(93.6); S109(100)]	10.16
High	ENSP00000386134.3	pep chromosome:GRCh38:14:23469703:23478173:1 gene:ENSG00000129460.16 transcript:ENST00000408901.8 gene_biotype:protein_coding transcript_biotype:protein_coding gene_symbol:NGDN description:neuroguidin [Source:HGNC Symbol;Acc:HGNC:20271]	FALSE	TRUE	6.66667	1	3	1	High	High	High	High	Phospho [S142(100); S143(100)]	12.14
High	ENSP00000356437.3	pep chromosome:GRCh38:6:148342838:148552044:1 gene:ENSG00000111961.18 transcript:ENST00000367467.8 gene_biotype:protein_coding transcript_biotype:protein_coding gene_symbol:SASH1 description:SAM and SH3 domain containing 1 [Source:HGNC Symbol;Acc:HGNC:19182]	FALSE	TRUE	4.2502	5	6	5	High	High	High	High	Phospho [S137(99.3); S248(100); S721(91.1); S813(100)]	15.28
High	ENSP00000281419.3	pep chromosome:GRCh38:2:9206812:9405678:1 gene:ENSG00000151693.11 transcript:ENST00000281419.8 gene_biotype:protein_coding transcript_biotype:protein_coding gene_symbol:ASAP2 description:ArfGAP with SH3 domain, ankyrin repeat and PH domain 2 [Source:HGNC Symbol;Acc:HGNC:2721]	FALSE	TRUE	1.59046	1	2	1	High	High	High	High	Phospho [S701(100)]	8.81
High	ENSP00000301396.5	pep chromosome:GRCh38:17:4671385:4704337:-1 gene:ENSG00000141456.16 transcript:ENST00000301396.8 gene_biotype:protein_coding transcript_biotype:protein_coding gene_symbol:PELP1 description:proline, glutamate and leucine rich protein 1 [Source:HGNC Symbol;Acc:HGNC:30134]	FALSE	TRUE	6.77966	3	5	3	High	High	High	High	Phospho [S531(99.1); S1093(100)]	15.16
High	ENSP00000410402.3	pep chromosome:GRCh38:17:12020834:12143830:1 gene:ENSG00000065559.15 transcript:ENST00000415385.7 gene_biotype:protein_coding transcript_biotype:protein_coding gene_symbol:MAP2K4 description:mitogen-activated protein kinase kinase 4 [Source:HGNC Symbol;Acc:HGNC:6844]	FALSE	TRUE	8.04878	2	4	2	High	High	High	High	Phospho [S101(100); S405(99.4)]	12.88
High	ENSP00000381064.3	pep chromosome:GRCh38:8:19817416:19852067:1 gene:ENSG00000104613.12 transcript:ENST00000397977.8 gene_biotype:protein_coding transcript_biotype:protein_coding gene_symbol:INTS10 description:integrator complex subunit 10 [Source:HGNC Symbol;Acc:HGNC:25548]	FALSE	TRUE	1.69014	1	4	1	High	High	High	High	Phospho [S382(94.7)]	9.86
High	ENSP00000387059.3	pep chromosome:GRCh38:17:75135248:75154512:-1 gene:ENSG00000189159.16 transcript:ENST00000409753.8 gene_biotype:protein_coding transcript_biotype:protein_coding gene_symbol:JPT1 description:Jupiter microtubule associated homolog 1 [Source:HGNC Symbol;Acc:HGNC:14569]	FALSE	TRUE	48.0519	3	8	3	High	High	High	High	Phospho [T54(100); S91(90.7); S131(99.8)]	13.43
High	ENSP00000256429.3	pep chromosome:GRCh38:18:54151606:54224669:-1 gene:ENSG00000134046.12 transcript:ENST00000256429.8 gene_biotype:protein_coding transcript_biotype:protein_coding gene_symbol:MBD2 description:methyl-CpG binding domain protein 2 [Source:HGNC Symbol;Acc:HGNC:6917]	FALSE	TRUE	4.13625	1	3	1	High	High	High	High	Phospho [S407(100)]	14.98
High	ENSP00000307959.7	pep chromosome:GRCh38:6:56457989:56851916:-1 gene:ENSG00000151914.20 transcript:ENST00000312431.10 gene_biotype:protein_coding transcript_biotype:protein_coding gene_symbol:DST description:dystonin [Source:HGNC Symbol;Acc:HGNC:1090]	FALSE	TRUE	0.433448	2	3	1	High	High	High	High	Phospho [S19(100); S1673(100)]	12.47
High	ENSP00000230895.6	pep chromosome:GRCh38:5:10679230:10761272:-1 gene:ENSG00000112977.15 transcript:ENST00000230895.10 gene_biotype:protein_coding transcript_biotype:protein_coding gene_symbol:DAP description:death associated protein [Source:HGNC Symbol;Acc:HGNC:2672]	FALSE	TRUE	27.451	2	4	2	High	High	High	High	Phospho [S51(98.1)]	6.57
High	ENSP00000499895.1	pep chromosome:GRCh38:CHR_HG2121_PATCH:89643512:89819723:-1 gene:ENSG00000288121.1 transcript:ENST00000672983.1 gene_biotype:protein_coding transcript_biotype:protein_coding gene_symbol:MDN1 description:midasin AAA ATPase 1 [Source:HGNC Symbol;Acc:HGNC:18302]	FALSE	TRUE	0.911365	3	3	3	High	High	High	High	Phospho [S4538(100); S4752(100); S4754(100)]	13.02
High	ENSP00000380921.3	pep chromosome:GRCh38:X:19533977:19887600:-1 gene:ENSG00000147010.18 transcript:ENST00000397821.8 gene_biotype:protein_coding transcript_biotype:protein_coding gene_symbol:SH3KBP1 description:SH3 domain containing kinase binding protein 1 [Source:HGNC Symbol;Acc:HGNC:13867]	FALSE	TRUE	6.46617	3	6	3	High	High	High	High	Phospho [S183(99.9); S230(100); S587(94)]	12.79
High	ENSP00000452521.1	pep chromosome:GRCh38:14:57390586:57415906:1 gene:ENSG00000139977.14 transcript:ENST00000556492.6 gene_biotype:protein_coding transcript_biotype:protein_coding gene_symbol:NAA30 description:N(alpha)-acetyltransferase 30, NatC catalytic subunit [Source:HGNC Symbol;Acc:HGNC:19844]	FALSE	TRUE	11.326	2	2	2	High	High	High	High	Phospho [S39(100); S55(100)]	10.9
High	ENSP00000330349.8	pep chromosome:GRCh38:5:177511577:177516961:-1 gene:ENSG00000183258.12 transcript:ENST00000330503.12 gene_biotype:protein_coding transcript_biotype:protein_coding gene_symbol:DDX41 description:DEAD-box helicase 41 [Source:HGNC Symbol;Acc:HGNC:18674]	FALSE	TRUE	4.50161	1	4	1	High	High	High	High	Phospho [S23(90)]	15.88
High	ENSP00000379441.4	pep chromosome:GRCh38:5:79236131:79327211:1 gene:ENSG00000152409.9 transcript:ENST00000396137.5 gene_biotype:protein_coding transcript_biotype:protein_coding gene_symbol:JMY description:junction mediating and regulatory protein, p53 cofactor [Source:HGNC Symbol;Acc:HGNC:28916]	FALSE	TRUE	5.5668	3	4	3	High	High	High	High	Phospho [S115(100); S713(100); S974(99.4)]	11.43
High	ENSP00000308727.3	pep chromosome:GRCh38:3:33150043:33218810:-1 gene:ENSG00000173705.9 transcript:ENST00000309558.8 gene_biotype:protein_coding transcript_biotype:protein_coding gene_symbol:SUSD5 description:sushi domain containing 5 [Source:HGNC Symbol;Acc:HGNC:29061]	FALSE	TRUE	3.33863	2	4	2	High	High	High	High	Phospho [S240(99.4)]	8.15
High	ENSP00000419879.1	pep chromosome:GRCh38:20:5127008:5197887:1 gene:ENSG00000101290.14 transcript:ENST00000460006.6 gene_biotype:protein_coding transcript_biotype:protein_coding gene_symbol:CDS2 description:CDP-diacylglycerol synthase 2 [Source:HGNC Symbol;Acc:HGNC:1801]	FALSE	TRUE	6.96629	2	7	2	High	High	High	High	Phospho [S21(92.2); S33(99.5)]	16.02
High	ENSP00000413625.1	pep chromosome:GRCh38:9:129887187:130043189:-1 gene:ENSG00000187239.17 transcript:ENST00000446176.7 gene_biotype:protein_coding transcript_biotype:protein_coding gene_symbol:FNBP1 description:formin binding protein 1 [Source:HGNC Symbol;Acc:HGNC:17069]	FALSE	TRUE	5.18639	2	3	2	High	High	High	High	Phospho [S296(98.6); S497(89.3)]	9.55
High	ENSP00000344868.7	pep chromosome:GRCh38:7:35800986:35907105:1 gene:ENSG00000122545.20 transcript:ENST00000350320.10 gene_biotype:protein_coding transcript_biotype:protein_coding gene_symbol:SEPTIN7 description:septin 7 [Source:HGNC Symbol;Acc:HGNC:1717]	FALSE	TRUE	9.61098	3	4	3	High	High	High	High	Phospho [T228(100); S334(99.7); T426(100)]	6.93
High	ENSP00000377944.3	pep chromosome:GRCh38:X:129906164:129929752:1 gene:ENSG00000156697.13 transcript:ENST00000394422.8 gene_biotype:protein_coding transcript_biotype:protein_coding gene_symbol:UTP14A description:UTP14A small subunit processome component [Source:HGNC Symbol;Acc:HGNC:10665]	FALSE	TRUE	3.76135	2	4	2	High	High	High	High	Phospho [S29(100); S31(100); S453(90.5)]	17.3
High	ENSP00000417354.1	pep chromosome:GRCh38:3:168008689:168095924:-1 gene:ENSG00000173905.9 transcript:ENST00000470487.6 gene_biotype:protein_coding transcript_biotype:protein_coding gene_symbol:GOLIM4 description:golgi integral membrane protein 4 [Source:HGNC Symbol;Acc:HGNC:15448]	FALSE	TRUE	8.04598	3	4	3	High	High	High	High	Phospho [S364(100); S538(100); S583(100)]	12.41
High	ENSP00000494067.1	pep chromosome:GRCh38:3:69021848:69052333:-1 gene:ENSG00000144747.17 transcript:ENST00000646708.1 gene_biotype:protein_coding transcript_biotype:protein_coding gene_symbol:TMF1 description:TATA element modulatory factor 1 [Source:HGNC Symbol;Acc:HGNC:11870]	FALSE	TRUE	5.10949	3	8	3	High	High	High	High	Phospho [S77(100); S344(100)]	14.13
High	ENSP00000261667.3	pep chromosome:GRCh38:13:49699320:49792682:-1 gene:ENSG00000102753.10 transcript:ENST00000261667.8 gene_biotype:protein_coding transcript_biotype:protein_coding gene_symbol:KPNA3 description:karyopherin subunit alpha 3 [Source:HGNC Symbol;Acc:HGNC:6396]	FALSE	TRUE	3.45489	1	5	1	High	High	High	High	Phospho [S56(100); S60(100)]	21.56
High	ENSP00000294244.3	pep chromosome:GRCh38:11:63813456:63827716:1 gene:ENSG00000168005.9 transcript:ENST00000294244.9 gene_biotype:protein_coding transcript_biotype:protein_coding gene_symbol:SPINDOC description:spindlin interactor and repressor of chromatin binding [Source:HGNC Symbol;Acc:HGNC:25115]	FALSE	TRUE	17.0604	3	4	3	High	High	High	High	Phospho [S148(100); S152(100); S248(100); S308(88.9)]	14.74
High	ENSP00000358064.4	pep chromosome:GRCh38:1:150364711:150473556:1 gene:ENSG00000163125.15 transcript:ENST00000369068.4 gene_biotype:protein_coding transcript_biotype:protein_coding gene_symbol:RPRD2 description:regulation of nuclear pre-mRNA domain containing 2 [Source:HGNC Symbol;Acc:HGNC:29039]	FALSE	TRUE	3.14853	3	4	3	High	High	High	High	Phospho [T358(99.9); S374(100); T723(100)]	14.07
High	ENSP00000253754.3	pep chromosome:GRCh38:5:132257696:132273454:1 gene:ENSG00000131435.13 transcript:ENST00000253754.8 gene_biotype:protein_coding transcript_biotype:protein_coding gene_symbol:PDLIM4 description:PDZ and LIM domain 4 [Source:HGNC Symbol;Acc:HGNC:16501]	FALSE	TRUE	12.4242	2	13	2	High	High	High	High	Phospho [S112(99.7); S135(99.6)]	26.27
High	ENSP00000479320.1	pep chromosome:GRCh38:12:6556870:6568332:-1 gene:ENSG00000111641.11 transcript:ENST00000620535.4 gene_biotype:protein_coding transcript_biotype:protein_coding gene_symbol:NOP2 description:NOP2 nucleolar protein [Source:HGNC Symbol;Acc:HGNC:7867]	FALSE	TRUE	5.2071	2	3	2	High	High	High	High	Phospho [S214(87.2); S765(100)]	11.48
High	ENSP00000484435.1	pep chromosome:GRCh38:12:6867420:6870946:1 gene:ENSG00000111669.15 transcript:ENST00000613953.4 gene_biotype:protein_coding transcript_biotype:protein_coding gene_symbol:TPI1 description:triosephosphate isomerase 1 [Source:HGNC Symbol;Acc:HGNC:12009]	FALSE	TRUE	9.44056	3	7	3	High	High	High	High	Phospho [S58(100)]	28.75
High	ENSP00000308546.2	pep chromosome:GRCh38:7:100429831:100434118:1 gene:ENSG00000146834.14 transcript:ENST00000310512.4 gene_biotype:protein_coding transcript_biotype:protein_coding gene_symbol:MEPCE description:methylphosphate capping enzyme [Source:HGNC Symbol;Acc:HGNC:20247]	FALSE	TRUE	6.67634	4	4	4	High	High	High	High	Phospho [S60(99.3); S69(100); S217(99.5); S686(100)]	10.57
High	ENSP00000405068.2	pep chromosome:GRCh38:4:2937936:2963406:-1 gene:ENSG00000087269.16 transcript:ENST00000416614.7 gene_biotype:protein_coding transcript_biotype:protein_coding gene_symbol:NOP14 description:NOP14 nucleolar protein [Source:HGNC Symbol;Acc:HGNC:16821]	FALSE	TRUE	1.63361	1	2	1	High	High	High	High	Phospho [S146(100); S148(100)]	9.59
High	ENSP00000343535.4	pep chromosome:GRCh38:16:8892097:8963906:-1 gene:ENSG00000187555.15 transcript:ENST00000344836.9 gene_biotype:protein_coding transcript_biotype:protein_coding gene_symbol:USP7 description:ubiquitin specific peptidase 7 [Source:HGNC Symbol;Acc:HGNC:12630]	FALSE	TRUE	2.17786	1	3	1	High	High	High	High	Phospho [S18(100)]	17.32
High	ENSP00000431124.1	pep chromosome:GRCh38:8:120535756:120812046:-1 gene:ENSG00000172164.15 transcript:ENST00000517992.2 gene_biotype:protein_coding transcript_biotype:protein_coding gene_symbol:SNTB1 description:syntrophin beta 1 [Source:HGNC Symbol;Acc:HGNC:11168]	FALSE	TRUE	7.62082	3	3	3	High	High	High	High	Phospho [S87(100); S219(100)]	10.96
High	ENSP00000289968.6	pep chromosome:GRCh38:16:24919389:25015369:-1 gene:ENSG00000140750.17 transcript:ENST00000289968.11 gene_biotype:protein_coding transcript_biotype:protein_coding gene_symbol:ARHGAP17 description:Rho GTPase activating protein 17 [Source:HGNC Symbol;Acc:HGNC:18239]	FALSE	TRUE	6.58343	2	3	2	High	High	High	High	Phospho [S575(100); T679(89.4)]	14.33
High	ENSP00000298552.3	pep chromosome:GRCh38:9:132891348:132944633:-1 gene:ENSG00000165699.14 transcript:ENST00000298552.8 gene_biotype:protein_coding transcript_biotype:protein_coding gene_symbol:TSC1 description:TSC complex subunit 1 [Source:HGNC Symbol;Acc:HGNC:12362]	FALSE	TRUE	4.55326	3	6	3	High	High	High	High	Phospho [S505(100); S1080(83.6)]	11.35
High	ENSP00000363891.3	pep chromosome:GRCh38:17:81244811:81295307:-1 gene:ENSG00000157637.13 transcript:ENST00000374759.8 gene_biotype:protein_coding transcript_biotype:protein_coding gene_symbol:SLC38A10 description:solute carrier family 38 member 10 [Source:HGNC Symbol;Acc:HGNC:28237]	FALSE	TRUE	2.14477	2	3	2	High	High	High	High	Phospho [S802(100); S997(100)]	8.31
High	ENSP00000358770.3	pep chromosome:GRCh38:10:103967140:104029233:1 gene:ENSG00000065613.15 transcript:ENST00000369755.4 gene_biotype:protein_coding transcript_biotype:protein_coding gene_symbol:SLK description:STE20 like kinase [Source:HGNC Symbol;Acc:HGNC:11088]	FALSE	TRUE	3.64372	2	3	2	High	High	High	High	Phospho [S571(100)]	11.17
High	ENSP00000366284.1	pep chromosome:GRCh38:1:10232250:10381597:1 gene:ENSG00000054523.17 transcript:ENST00000377081.5 gene_biotype:protein_coding transcript_biotype:protein_coding gene_symbol:KIF1B description:kinesin family member 1B [Source:HGNC Symbol;Acc:HGNC:16636]	FALSE	TRUE	1.86506	3	6	3	High	High	High	High	Phospho [S1057(100); S1454(94.4); S1487(100)]	13.08
High	ENSP00000341680.5	pep chromosome:GRCh38:6:15522801:15663042:-1 gene:ENSG00000047579.19 transcript:ENST00000344537.9 gene_biotype:protein_coding transcript_biotype:protein_coding gene_symbol:DTNBP1 description:dystrobrevin binding protein 1 [Source:HGNC Symbol;Acc:HGNC:17328]	FALSE	TRUE	12.2507	2	7	2	High	High	High	High	Phospho [S316(99.6); S321(100); S349(100)]	17.31
High	ENSP00000356556.4	pep chromosome:GRCh38:6:143536845:143824164:1 gene:ENSG00000112419.14 transcript:ENST00000367584.8 gene_biotype:protein_coding transcript_biotype:protein_coding gene_symbol:PHACTR2 description:phosphatase and actin regulator 2 [Source:HGNC Symbol;Acc:HGNC:20956]	FALSE	TRUE	10.6109	3	3	3	High	High	High	High	Phospho [S53(95); T93(99.9); S431(99.4); S433(100)]	9.16
High	ENSP00000367407.3	pep chromosome:GRCh38:10:15105770:15168693:-1 gene:ENSG00000152465.18 transcript:ENST00000378165.9 gene_biotype:protein_coding transcript_biotype:protein_coding gene_symbol:NMT2 description:N-myristoyltransferase 2 [Source:HGNC Symbol;Acc:HGNC:7858]	FALSE	TRUE	4.01606	2	5	2	High	High	High	High	Phospho [T64(87.7); S68(99.7)]	13.69
High	ENSP00000461988.1	pep chromosome:GRCh38:17:63622415:63695089:1 gene:ENSG00000198909.7 transcript:ENST00000579585.5 gene_biotype:protein_coding transcript_biotype:protein_coding gene_symbol:MAP3K3 description:mitogen-activated protein kinase kinase kinase 3 [Source:HGNC Symbol;Acc:HGNC:6855]	FALSE	TRUE	3.95738	3	3	3	High	High	High	High	Phospho [S207(98); S371(99.9)]	8.91
High	ENSP00000487984.1	pep chromosome:GRCh38:CHR_HSCHR11_1_CTG7:2943973:2991260:-1 gene:ENSG00000273562.4 transcript:ENST00000632791.1 gene_biotype:protein_coding transcript_biotype:protein_coding gene_symbol:NAP1L4 description:nucleosome assembly protein 1 like 4 [Source:HGNC Symbol;Acc:HGNC:7640]	FALSE	TRUE	6.47668	1	3	1	High	High	High	High	Phospho [S125(100)]	17.21
High	ENSP00000321703.4	pep chromosome:GRCh38:8:38787236:38853028:1 gene:ENSG00000147526.20 transcript:ENST00000317827.9 gene_biotype:protein_coding transcript_biotype:protein_coding gene_symbol:TACC1 description:transforming acidic coiled-coil containing protein 1 [Source:HGNC Symbol;Acc:HGNC:11522]	FALSE	TRUE	5.96273	2	2	2	High	High	High	High	Phospho [S44(100); S305(100)]	10.23
High	ENSP00000327104.5	pep chromosome:GRCh38:14:53043968:53153098:-1 gene:ENSG00000100523.14 transcript:ENST00000323669.9 gene_biotype:protein_coding transcript_biotype:protein_coding gene_symbol:DDHD1 description:DDHD domain containing 1 [Source:HGNC Symbol;Acc:HGNC:19714]	FALSE	TRUE	5.33333	2	3	2	High	High	High	High	Phospho [S224(99.6); S225(100); S723(90.6); S727(98.9)]	10.5
High	ENSP00000318690.3	pep chromosome:GRCh38:2:75662705:75710915:-1 gene:ENSG00000005436.14 transcript:ENST00000321027.8 gene_biotype:protein_coding transcript_biotype:protein_coding gene_symbol:GCFC2 description:GC-rich sequence DNA-binding factor 2 [Source:HGNC Symbol;Acc:HGNC:1317]	FALSE	TRUE	2.1767	3	3	3	High	High	High	High	Phospho [S180(100)]	7.84
High	ENSP00000480836.1	pep chromosome:GRCh38:22:17638584:17730855:1 gene:ENSG00000099968.18 transcript:ENST00000618481.4 gene_biotype:protein_coding transcript_biotype:protein_coding gene_symbol:BCL2L13 description:BCL2 like 13 [Source:HGNC Symbol;Acc:HGNC:17164]	FALSE	TRUE	9.62672	3	8	3	High	High	High	High	Phospho [S450(100); S468(99.6)]	14.85
High	ENSP00000446184.2	pep chromosome:GRCh38:10:97356701:97426074:-1 gene:ENSG00000052749.13 transcript:ENST00000536831.5 gene_biotype:protein_coding transcript_biotype:protein_coding gene_symbol:RRP12 description:ribosomal RNA processing 12 homolog [Source:HGNC Symbol;Acc:HGNC:29100]	FALSE	TRUE	1.69622	1	3	1	High	High	High	High	Phospho [S1080(100)]	18.36
High	ENSP00000320117.7	pep chromosome:GRCh38:19:6739680:6751530:1 gene:ENSG00000125733.18 transcript:ENST00000313244.14 gene_biotype:protein_coding transcript_biotype:protein_coding gene_symbol:TRIP10 description:thyroid hormone receptor interactor 10 [Source:HGNC Symbol;Acc:HGNC:12304]	FALSE	TRUE	3.99334	2	5	2	High	High	High	High	Phospho [S296(92.1); S299(99.3); S482(99.7)]	12.47
High	ENSP00000261503.5	pep chromosome:GRCh38:17:20087022:20314755:1 gene:ENSG00000128487.16 transcript:ENST00000261503.9 gene_biotype:protein_coding transcript_biotype:protein_coding gene_symbol:SPECC1 description:sperm antigen with calponin homology and coiled-coil domains 1 [Source:HGNC Symbol;Acc:HGNC:30615]	FALSE	TRUE	2.24719	2	10	2	High	High	High	High	Phospho [S314(92.4); S810(91.3)]	13.43
High	ENSP00000216044.5	pep chromosome:GRCh38:22:38705944:38733587:1 gene:ENSG00000100226.16 transcript:ENST00000216044.10 gene_biotype:protein_coding transcript_biotype:protein_coding gene_symbol:GTPBP1 description:GTP binding protein 1 [Source:HGNC Symbol;Acc:HGNC:4669]	FALSE	TRUE	7.47384	2	3	2	High	High	High	High	Phospho [S44(100); S47(100)]	11.76
High	ENSP00000005286.4	pep chromosome:GRCh38:11:60924481:60937159:1 gene:ENSG00000006118.14 transcript:ENST00000005286.8 gene_biotype:protein_coding transcript_biotype:protein_coding gene_symbol:TMEM132A description:transmembrane protein 132A [Source:HGNC Symbol;Acc:HGNC:31092]	FALSE	TRUE	2.14844	2	4	2	High	High	High	High	Phospho [S530(100)]	14.44
High	ENSP00000394899.1	pep chromosome:GRCh38:1:15152532:15220477:1 gene:ENSG00000171729.14 transcript:ENST00000428417.5 gene_biotype:protein_coding transcript_biotype:protein_coding gene_symbol:TMEM51 description:transmembrane protein 51 [Source:HGNC Symbol;Acc:HGNC:25488]	FALSE	TRUE	22.9249	2	2	2	High	High	High	High	Phospho [S115(100); T234(100)]	10.31
High	ENSP00000341874.3	pep chromosome:GRCh38:18:23453287:23483140:1 gene:ENSG00000101782.15 transcript:ENST00000339486.8 gene_biotype:protein_coding transcript_biotype:protein_coding gene_symbol:RIOK3 description:RIO kinase 3 [Source:HGNC Symbol;Acc:HGNC:11451]	FALSE	TRUE	4.04624	2	4	2	High	High	High	High	Phospho [S127(99.7); S128(100)]	16.88
High	ENSP00000216218.3	pep chromosome:GRCh38:22:40824535:40856639:-1 gene:ENSG00000100380.14 transcript:ENST00000216218.8 gene_biotype:protein_coding transcript_biotype:protein_coding gene_symbol:ST13 description:ST13 Hsp70 interacting protein [Source:HGNC Symbol;Acc:HGNC:11343]	FALSE	TRUE	5.96206	2	7	2	High	High	High	High	Phospho [S75(100); S76(100); S79(100)]	22.25
High	ENSP00000308117.3	pep chromosome:GRCh38:11:66314494:66317044:-1 gene:ENSG00000174807.4 transcript:ENST00000311330.4 gene_biotype:protein_coding transcript_biotype:protein_coding gene_symbol:CD248 description:CD248 molecule [Source:HGNC Symbol;Acc:HGNC:18219]	FALSE	TRUE	2.50991	2	6	2	High	High	High	High	Phospho [T752(99.7)]	12.95
High	ENSP00000370007.1	pep chromosome:GRCh38:X:12975658:12977081:1 gene:ENSG00000205542.11 transcript:ENST00000380633.1 gene_biotype:protein_coding transcript_biotype:protein_coding gene_symbol:TMSB4X description:thymosin beta 4 X-linked [Source:HGNC Symbol;Acc:HGNC:11881]	FALSE	TRUE	45.4545	5	6	5	High	High	High	High	Phospho [T23(100)]	11.38
High	ENSP00000393776.2	pep chromosome:GRCh38:5:72956041:73090522:1 gene:ENSG00000157107.14 transcript:ENST00000430046.7 gene_biotype:protein_coding transcript_biotype:protein_coding gene_symbol:FCHO2 description:FCH domain only 2 [Source:HGNC Symbol;Acc:HGNC:25180]	FALSE	TRUE	2.09877	2	6	2	High	High	High	High	Phospho [S394(100); S403(100)]	9.88
High	ENSP00000251496.2	pep chromosome:GRCh38:4:17810979:17844865:1 gene:ENSG00000109805.10 transcript:ENST00000251496.7 gene_biotype:protein_coding transcript_biotype:protein_coding gene_symbol:NCAPG description:non-SMC condensin I complex subunit G [Source:HGNC Symbol;Acc:HGNC:24304]	FALSE	TRUE	3.94089	2	2	2	High	High	High	High	Phospho [S674(100); S973(99.9); S975(100)]	10.53
High	ENSP00000343325.4	pep chromosome:GRCh38:19:14440260:14471866:1 gene:ENSG00000123143.12 transcript:ENST00000342216.8 gene_biotype:protein_coding transcript_biotype:protein_coding gene_symbol:PKN1 description:protein kinase N1 [Source:HGNC Symbol;Acc:HGNC:9405]	FALSE	TRUE	9.38819	4	9	4	High	High	High	High	Phospho [S378(90.6); S922(100)]	15.81
High	ENSP00000299413.5	pep chromosome:GRCh38:11:35662775:35818007:1 gene:ENSG00000166326.7 transcript:ENST00000299413.7 gene_biotype:protein_coding transcript_biotype:protein_coding gene_symbol:TRIM44 description:tripartite motif containing 44 [Source:HGNC Symbol;Acc:HGNC:19016]	FALSE	TRUE	4.94186	1	3	1	High	High	High	High	Phospho [S339(100)]	11.53
High	ENSP00000388731.2	pep chromosome:GRCh38:2:181891730:181930738:1 gene:ENSG00000138434.17 transcript:ENST00000431877.7 gene_biotype:protein_coding transcript_biotype:protein_coding gene_symbol:ITPRID2 description:ITPR interacting domain containing 2 [Source:HGNC Symbol;Acc:HGNC:11319]	FALSE	TRUE	2.85941	3	3	3	High	High	High	High	Phospho [S92(100); S318(99.7); S668(100)]	8.37
High	ENSP00000385727.1	pep chromosome:GRCh38:5:66596361:67169595:1 gene:ENSG00000069020.18 transcript:ENST00000403625.6 gene_biotype:protein_coding transcript_biotype:protein_coding gene_symbol:MAST4 description:microtubule associated serine/threonine kinase family member 4 [Source:HGNC Symbol;Acc:HGNC:19037]	FALSE	TRUE	1.63934	3	4	3	High	High	High	High	Phospho [S1384(92); S1391(92.5); S1523(100); S1822(100)]	10.93
High	ENSP00000439032.1	pep chromosome:GRCh38:X:101623361:101627841:1 gene:ENSG00000102401.20 transcript:ENST00000537169.1 gene_biotype:protein_coding transcript_biotype:protein_coding gene_symbol:ARMCX3 description:armadillo repeat containing X-linked 3 [Source:HGNC Symbol;Acc:HGNC:24065]	FALSE	TRUE	3.95778	1	3	1	High	High	High	High	Phospho [S61(100)]	15.13
High	ENSP00000321826.6	pep chromosome:GRCh38:6:147204533:147384755:1 gene:ENSG00000164506.14 transcript:ENST00000321680.10 gene_biotype:protein_coding transcript_biotype:protein_coding gene_symbol:STXBP5 description:syntaxin binding protein 5 [Source:HGNC Symbol;Acc:HGNC:19665]	FALSE	TRUE	3.82276	3	4	3	High	High	High	High	Phospho [S723(100); S759(89.1); T784(98.7); S785(98.7)]	5.44
High	ENSP00000490119.1	pep chromosome:GRCh38:14:35539069:35809214:-1 gene:ENSG00000174373.16 transcript:ENST00000637992.1 gene_biotype:protein_coding transcript_biotype:protein_coding gene_symbol:RALGAPA1 description:Ral GTPase activating protein catalytic alpha subunit 1 [Source:HGNC Symbol;Acc:HGNC:17770]	FALSE	TRUE	1.56313	3	7	3	High	High	High	High	Phospho [S740(99.9); S1319(93.7)]	8.39
High	ENSP00000285021.7	pep chromosome:GRCh38:3:14145147:14178783:-1 gene:ENSG00000154767.14 transcript:ENST00000285021.11 gene_biotype:protein_coding transcript_biotype:protein_coding gene_symbol:XPC description:XPC complex subunit, DNA damage recognition and repair factor [Source:HGNC Symbol;Acc:HGNC:12816]	FALSE	TRUE	3.19149	1	4	1	High	High	High	High	Phospho [S883(100); S884(100)]	16.97
High	ENSP00000263918.4	pep chromosome:GRCh38:2:36837698:36966536:-1 gene:ENSG00000115808.12 transcript:ENST00000263918.9 gene_biotype:protein_coding transcript_biotype:protein_coding gene_symbol:STRN description:striatin [Source:HGNC Symbol;Acc:HGNC:11424]	FALSE	TRUE	2.94872	2	2	2	High	High	High	High	Phospho [S245(100)]	9.3
High	ENSP00000355388.4	pep chromosome:GRCh38:13:19633659:19673441:1 gene:ENSG00000196199.14 transcript:ENST00000361479.10 gene_biotype:protein_coding transcript_biotype:protein_coding gene_symbol:MPHOSPH8 description:M-phase phosphoprotein 8 [Source:HGNC Symbol;Acc:HGNC:29810]	FALSE	TRUE	4.53488	2	7	2	High	High	High	High	Phospho [S51(100); T84(87.4)]	14.07
High	ENSP00000257430.4	pep chromosome:GRCh38:5:112737885:112846239:1 gene:ENSG00000134982.17 transcript:ENST00000257430.9 gene_biotype:protein_coding transcript_biotype:protein_coding gene_symbol:APC description:APC regulator of WNT signaling pathway [Source:HGNC Symbol;Acc:HGNC:583]	FALSE	TRUE	1.61801	4	5	4	High	High	High	High	Phospho [T1438(100); S2241(76.4); S2830(100)]	13.1
High	ENSP00000394316.2	pep chromosome:GRCh38:2:200812356:200822243:1 gene:ENSG00000082153.18 transcript:ENST00000452790.6 gene_biotype:protein_coding transcript_biotype:protein_coding gene_symbol:BZW1 description:basic leucine zipper and W2 domains 1 [Source:HGNC Symbol;Acc:HGNC:18380]	FALSE	TRUE	3.10421	1	10	1	High	High	High	High	Phospho [S443(100)]	41.2
High	ENSP00000257604.5	pep chromosome:GRCh38:12:112125545:112153603:1 gene:ENSG00000135148.12 transcript:ENST00000257604.9 gene_biotype:protein_coding transcript_biotype:protein_coding gene_symbol:TRAFD1 description:TRAF-type zinc finger domain containing 1 [Source:HGNC Symbol;Acc:HGNC:24808]	FALSE	TRUE	4.63918	2	5	2	High	High	High	High	Phospho [S415(100)]	11.57
High	ENSP00000221543.4	pep chromosome:GRCh38:19:49877702:49888750:1 gene:ENSG00000104946.13 transcript:ENST00000221543.10 gene_biotype:protein_coding transcript_biotype:protein_coding gene_symbol:TBC1D17 description:TBC1 domain family member 17 [Source:HGNC Symbol;Acc:HGNC:25699]	FALSE	TRUE	4.93827	1	9	1	High	High	High	High	Phospho [S633(100); S634(100)]	22.24
High	ENSP00000276052.6	pep chromosome:GRCh38:X:47223018:47229993:1 gene:ENSG00000102225.16 transcript:ENST00000276052.10 gene_biotype:protein_coding transcript_biotype:protein_coding gene_symbol:CDK16 description:cyclin dependent kinase 16 [Source:HGNC Symbol;Acc:HGNC:8749]	FALSE	TRUE	5.96491	2	3	2	High	High	High	High	Phospho [S169(100); S227(94.1)]	11.77
High	ENSP00000303758.4	pep chromosome:GRCh38:1:23084030:23177808:-1 gene:ENSG00000169641.13 transcript:ENST00000302291.8 gene_biotype:protein_coding transcript_biotype:protein_coding gene_symbol:LUZP1 description:leucine zipper protein 1 [Source:HGNC Symbol;Acc:HGNC:14985]	FALSE	TRUE	3.43866	4	7	4	High	High	High	High	Phospho [S233(100); S394(100); S574(94.8); S905(94.1)]	6.13
High	ENSP00000469689.2	pep chromosome:GRCh38:11:70469435:71224762:-1 gene:ENSG00000162105.19 transcript:ENST00000601538.5 gene_biotype:protein_coding transcript_biotype:protein_coding gene_symbol:SHANK2 description:SH3 and multiple ankyrin repeat domains 2 [Source:HGNC Symbol;Acc:HGNC:14295]	FALSE	TRUE	1.89292	2	4	2	High	High	High	High	Phospho [S1448(98.2); S1709(100)]	9.21
High	ENSP00000372681.4	pep chromosome:GRCh38:CHR_HSCHR6_MHC_QBL_CTG1:33247394:33251851:-1 gene:ENSG00000206279.10 transcript:ENST00000383194.8 gene_biotype:protein_coding transcript_biotype:protein_coding gene_symbol:DAXX description:death domain associated protein [Source:HGNC Symbol;Acc:HGNC:2681]	FALSE	TRUE	5.67568	2	8	2	High	High	High	High	Phospho [S668(98.6); S739(94.2)]	21.64
High	ENSP00000212015.6	pep chromosome:GRCh38:10:67884656:67918390:1 gene:ENSG00000096717.12 transcript:ENST00000212015.11 gene_biotype:protein_coding transcript_biotype:protein_coding gene_symbol:SIRT1 description:sirtuin 1 [Source:HGNC Symbol;Acc:HGNC:14929]	FALSE	TRUE	4.2838	3	6	3	High	High	High	High	Phospho [S27(99.6); S47(100)]	11.46
High	ENSP00000310129.4	pep chromosome:GRCh38:3:184299241:184309050:1 gene:ENSG00000175166.17 transcript:ENST00000310118.9 gene_biotype:protein_coding transcript_biotype:protein_coding gene_symbol:PSMD2 description:proteasome 26S subunit, non-ATPase 2 [Source:HGNC Symbol;Acc:HGNC:9559]	FALSE	TRUE	4.07489	3	3	3	High	High	High	High	Phospho [S16(100); S361(93.3)]	9.8
High	ENSP00000256441.4	pep chromosome:GRCh38:5:69217760:69230158:1 gene:ENSG00000134056.12 transcript:ENST00000256441.5 gene_biotype:protein_coding transcript_biotype:protein_coding gene_symbol:MRPS36 description:mitochondrial ribosomal protein S36 [Source:HGNC Symbol;Acc:HGNC:16631]	FALSE	TRUE	20.3883	1	2	1	High	High	High	High	Phospho [S61(99.9)]	5.99
High	ENSP00000453081.1	pep chromosome:GRCh38:15:70049091:70096851:-1 gene:ENSG00000140332.16 transcript:ENST00000559929.5 gene_biotype:protein_coding transcript_biotype:protein_coding gene_symbol:TLE3 description:TLE family member 3, transcriptional corepressor [Source:HGNC Symbol;Acc:HGNC:11839]	FALSE	TRUE	5.24297	3	6	2	High	High	High	High	Phospho [S213(99.5); T329(91.8)]	6.24
High	ENSP00000262109.7	pep chromosome:GRCh38:8:664200:731224:-1 gene:ENSG00000104714.14 transcript:ENST00000262109.8 gene_biotype:protein_coding transcript_biotype:protein_coding gene_symbol:ERICH1 description:glutamate rich 1 [Source:HGNC Symbol;Acc:HGNC:27234]	FALSE	TRUE	7.90068	2	3	2	High	High	High	High	Phospho [S238(100); S254(100)]	10.57
High	ENSP00000388756.1	pep chromosome:GRCh38:12:22449545:22544409:-1 gene:ENSG00000111731.12 transcript:ENST00000446597.5 gene_biotype:protein_coding transcript_biotype:protein_coding gene_symbol:C2CD5 description:C2 calcium dependent domain containing 5 [Source:HGNC Symbol;Acc:HGNC:29062]	FALSE	TRUE	2.66413	2	6	2	High	High	High	High	Phospho [S321(100); S323(100)]	9.28
High	ENSP00000393596.2	pep chromosome:GRCh38:2:32357028:32618899:1 gene:ENSG00000115760.14 transcript:ENST00000421745.6 gene_biotype:protein_coding transcript_biotype:protein_coding gene_symbol:BIRC6 description:baculoviral IAP repeat containing 6 [Source:HGNC Symbol;Acc:HGNC:13516]	FALSE	TRUE	0.391188	1	2	1	High	High	High	High	Phospho [S480(100)]	12.45
High	ENSP00000352400.5	pep chromosome:GRCh38:9:131125586:131234663:1 gene:ENSG00000126883.17 transcript:ENST00000359428.10 gene_biotype:protein_coding transcript_biotype:protein_coding gene_symbol:NUP214 description:nucleoporin 214 [Source:HGNC Symbol;Acc:HGNC:8064]	FALSE	TRUE	1.96172	2	10	2	High	High	High	High	Phospho [S430(99.5); Y977(95.6)]	14.88
High	ENSP00000490709.1	pep chromosome:GRCh38:16:28456371:28492041:-1 gene:ENSG00000261832.6 transcript:ENST00000635887.1 gene_biotype:protein_coding transcript_biotype:nonsense_mediated_decay gene_symbol:AC138894.1 description:novel protein	FALSE	TRUE	3.42466	1	3	1	High	High	High	High	Phospho [S12(100); S14(100)]	9.9
High	ENSP00000414202.1	pep chromosome:GRCh38:19:55229779:55259017:-1 gene:ENSG00000105063.19 transcript:ENST00000412770.7 gene_biotype:protein_coding transcript_biotype:protein_coding gene_symbol:PPP6R1 description:protein phosphatase 6 regulatory subunit 1 [Source:HGNC Symbol;Acc:HGNC:29195]	FALSE	TRUE	7.37798	2	3	2	High	High	High	High	Phospho [S635(100); S638(100); S667(90.8); T668(90.8); S670(99.9)]	12.78
High	ENSP00000408108.3	pep chromosome:GRCh38:1:224385143:224434794:-1 gene:ENSG00000162923.16 transcript:ENST00000414423.8 gene_biotype:protein_coding transcript_biotype:protein_coding gene_symbol:WDR26 description:WD repeat domain 26 [Source:HGNC Symbol;Acc:HGNC:21208]	FALSE	TRUE	1.44547	2	4	2	High	High	High	High	Phospho [S221(100)]	12.05
High	ENSP00000362727.2	pep chromosome:GRCh38:9:123379654:123930107:-1 gene:ENSG00000119522.16 transcript:ENST00000373624.6 gene_biotype:protein_coding transcript_biotype:protein_coding gene_symbol:DENND1A description:DENN domain containing 1A [Source:HGNC Symbol;Acc:HGNC:29324]	FALSE	TRUE	2.67592	3	3	3	High	High	High	High	Phospho [S546(100); S592(100)]	11.31
High	ENSP00000402527.2	pep chromosome:GRCh38:6:75601880:75718281:1 gene:ENSG00000112701.18 transcript:ENST00000447266.7 gene_biotype:protein_coding transcript_biotype:protein_coding gene_symbol:SENP6 description:SUMO specific peptidase 6 [Source:HGNC Symbol;Acc:HGNC:20944]	FALSE	TRUE	3.95683	3	4	3	High	High	High	High	Phospho [S335(100); S336(100); S352(95.4)]	12.24
High	ENSP00000369162.2	pep chromosome:GRCh38:6:7389808:7418037:1 gene:ENSG00000124784.9 transcript:ENST00000379834.7 gene_biotype:protein_coding transcript_biotype:protein_coding gene_symbol:RIOK1 description:RIO kinase 1 [Source:HGNC Symbol;Acc:HGNC:18656]	FALSE	TRUE	2.99296	1	4	1	High	High	High	High	Phospho [S22(99.8)]	8.06
High	ENSP00000498164.1	pep chromosome:GRCh38:3:184135377:184144966:1 gene:ENSG00000145191.15 transcript:ENST00000647909.1 gene_biotype:protein_coding transcript_biotype:protein_coding gene_symbol:EIF2B5 description:eukaryotic translation initiation factor 2B subunit epsilon [Source:HGNC Symbol;Acc:HGNC:3261]	FALSE	TRUE	2.74348	2	5	2	High	High	High	High	Phospho [S552(100); S725(99.9)]	16.88
High	ENSP00000352091.5	pep chromosome:GRCh38:11:3675011:3797792:-1 gene:ENSG00000110713.17 transcript:ENST00000359171.8 gene_biotype:protein_coding transcript_biotype:protein_coding gene_symbol:NUP98 description:nucleoporin 98 [Source:HGNC Symbol;Acc:HGNC:8068]	FALSE	TRUE	2.42157	3	5	3	High	High	High	High	Phospho [S623(94.4); S888(100); S1028(87.2)]	14.94
High	ENSP00000230340.4	pep chromosome:GRCh38:6:41921499:41933046:1 gene:ENSG00000112578.10 transcript:ENST00000230340.9 gene_biotype:protein_coding transcript_biotype:protein_coding gene_symbol:BYSL description:bystin like [Source:HGNC Symbol;Acc:HGNC:1157]	FALSE	TRUE	4.11899	1	2	1	High	High	High	High	Phospho [S98(100)]	11.02
High	ENSP00000304051.3	pep chromosome:GRCh38:8:124474738:124487914:1 gene:ENSG00000170881.4 transcript:ENST00000303545.3 gene_biotype:protein_coding transcript_biotype:protein_coding gene_symbol:RNF139 description:ring finger protein 139 [Source:HGNC Symbol;Acc:HGNC:17023]	FALSE	TRUE	3.61446	1	4	1	High	High	High	High	Phospho [S625(100); S634(100); T635(100)]	20.73
High	ENSP00000319104.6	pep chromosome:GRCh38:17:28662205:28702679:1 gene:ENSG00000109111.15 transcript:ENST00000314616.11 gene_biotype:protein_coding transcript_biotype:protein_coding gene_symbol:SUPT6H description:SPT6 homolog, histone chaperone and transcription elongation factor [Source:HGNC Symbol;Acc:HGNC:11470]	FALSE	TRUE	2.89687	2	2	2	High	High	High	High	Phospho [S75(90.6); S78(99); S125(100)]	11.34
High	ENSP00000009041.7	pep chromosome:GRCh38:7:38178222:38230671:1 gene:ENSG00000010270.13 transcript:ENST00000009041.11 gene_biotype:protein_coding transcript_biotype:protein_coding gene_symbol:STARD3NL description:STARD3 N-terminal like [Source:HGNC Symbol;Acc:HGNC:19169]	FALSE	TRUE	15.3846	2	5	2	High	High	High	High	Phospho [S39(93.8); S210(98.7); S218(99.9)]	8.48
High	ENSP00000311713.3	pep chromosome:GRCh38:3:38165537:38255484:1 gene:ENSG00000172939.9 transcript:ENST00000311806.8 gene_biotype:protein_coding transcript_biotype:protein_coding gene_symbol:OXSR1 description:oxidative stress responsive kinase 1 [Source:HGNC Symbol;Acc:HGNC:8508]	FALSE	TRUE	3.98482	1	3	1	High	High	High	High	Phospho [S339(100)]	12.01
High	ENSP00000265343.5	pep chromosome:GRCh38:5:132875395:132963634:-1 gene:ENSG00000072364.13 transcript:ENST00000265343.10 gene_biotype:protein_coding transcript_biotype:protein_coding gene_symbol:AFF4 description:AF4/FMR2 family member 4 [Source:HGNC Symbol;Acc:HGNC:17869]	FALSE	TRUE	8.08255	7	10	7	High	High	High	High	Phospho [S389(94); S549(100); S703(96.5); T734(100)]	16.06
High	ENSP00000494562.1	pep chromosome:GRCh38:CHR_HG2114_PATCH:47721035:47771882:-1 gene:ENSG00000285182.2 transcript:ENST00000646180.2 gene_biotype:protein_coding transcript_biotype:protein_coding gene_symbol:FNBP4 description:formin binding protein 4 [Source:HGNC Symbol;Acc:HGNC:19752]	FALSE	TRUE	4.52311	3	6	3	High	High	High	High	Phospho [S464(91.2); T479(99.1); S499(100)]	8.84
High	ENSP00000378505.3	pep chromosome:GRCh38:15:74614994:74630126:1 gene:ENSG00000179335.18 transcript:ENST00000395066.7 gene_biotype:protein_coding transcript_biotype:protein_coding gene_symbol:CLK3 description:CDC like kinase 3 [Source:HGNC Symbol;Acc:HGNC:2071]	FALSE	TRUE	5.79937	3	5	3	High	High	High	High	Phospho [S157(99.5); S215(99.4); S224(100); S226(100)]	9.01
High	ENSP00000497150.1	pep chromosome:GRCh38:10:114436178:114658283:-1 gene:ENSG00000099204.20 transcript:ENST00000649363.1 gene_biotype:protein_coding transcript_biotype:protein_coding gene_symbol:ABLIM1 description:actin binding LIM protein 1 [Source:HGNC Symbol;Acc:HGNC:78]	FALSE	TRUE	2.8777	2	4	2	High	High	High	High	Phospho [S447(92.5); S451(99.9)]	11.04
High	ENSP00000371321.1	pep chromosome:GRCh38:4:39287456:39366375:-1 gene:ENSG00000035928.16 transcript:ENST00000381897.5 gene_biotype:protein_coding transcript_biotype:protein_coding gene_symbol:RFC1 description:replication factor C subunit 1 [Source:HGNC Symbol;Acc:HGNC:9969]	FALSE	TRUE	3.91986	3	5	3	High	High	High	High	Phospho [S69(95); S71(95); S108(99.9); T110(99.9); S368(99.6)]	14.38
High	ENSP00000351416.4	pep chromosome:GRCh38:4:73073376:73258798:-1 gene:ENSG00000132466.19 transcript:ENST00000358602.9 gene_biotype:protein_coding transcript_biotype:protein_coding gene_symbol:ANKRD17 description:ankyrin repeat domain 17 [Source:HGNC Symbol;Acc:HGNC:23575]	FALSE	TRUE	2.57395	3	5	3	High	High	High	High	Phospho [S2059(100); S2401(99.7)]	12.7
High	ENSP00000223023.4	pep chromosome:GRCh38:7:123681943:123749003:-1 gene:ENSG00000106299.8 transcript:ENST00000223023.5 gene_biotype:protein_coding transcript_biotype:protein_coding gene_symbol:WASL description:WASP like actin nucleation promoting factor [Source:HGNC Symbol;Acc:HGNC:12735]	FALSE	TRUE	4.9505	1	6	1	High	High	High	High	Phospho [S484(100); S485(100)]	26.21
High	ENSP00000370719.3	pep chromosome:GRCh38:21:33642501:33899861:1 gene:ENSG00000205726.15 transcript:ENST00000381318.8 gene_biotype:protein_coding transcript_biotype:protein_coding gene_symbol:ITSN1 description:intersectin 1 [Source:HGNC Symbol;Acc:HGNC:6183]	FALSE	TRUE	2.67286	3	5	3	High	High	High	High	Phospho [S904(100); S986(98.3); T1144(99.6)]	8.47
High	ENSP00000298875.4	pep chromosome:GRCh38:14:92121969:92172145:1 gene:ENSG00000165934.13 transcript:ENST00000298875.9 gene_biotype:protein_coding transcript_biotype:protein_coding gene_symbol:CPSF2 description:cleavage and polyadenylation specific factor 2 [Source:HGNC Symbol;Acc:HGNC:2325]	FALSE	TRUE	2.94118	1	2	1	High	High	High	High	Phospho [S419(100); S420(100); S423(100)]	9.41
High	ENSP00000457243.1	pep chromosome:GRCh38:16:67170540:67175485:1 gene:ENSG00000140939.14 transcript:ENST00000564053.5 gene_biotype:protein_coding transcript_biotype:protein_coding gene_symbol:NOL3 description:nucleolar protein 3 [Source:HGNC Symbol;Acc:HGNC:7869]	FALSE	TRUE	12.5926	1	3	1	High	High	High	High	Phospho [T211(99.8)]	11.78
High	ENSP00000323858.7	pep chromosome:GRCh38:12:113157174:113185479:-1 gene:ENSG00000123064.12 transcript:ENST00000314045.11 gene_biotype:protein_coding transcript_biotype:protein_coding gene_symbol:DDX54 description:DEAD-box helicase 54 [Source:HGNC Symbol;Acc:HGNC:20084]	FALSE	TRUE	4.42177	2	4	2	High	High	High	High	Phospho [S39(100); S41(100); S782(100)]	11.8
High	ENSP00000307889.5	pep chromosome:GRCh38:16:89560657:89566828:1 gene:ENSG00000167526.13 transcript:ENST00000311528.9 gene_biotype:protein_coding transcript_biotype:protein_coding gene_symbol:RPL13 description:ribosomal protein L13 [Source:HGNC Symbol;Acc:HGNC:10303]	FALSE	TRUE	14.218	3	3	3	High	High	High	High	Phospho [S140(99.9)]	6.3
High	ENSP00000419713.1	pep chromosome:GRCh38:3:170866264:170870033:-1 gene:ENSG00000163584.18 transcript:ENST00000466674.5 gene_biotype:protein_coding transcript_biotype:protein_coding gene_symbol:RPL22L1 description:ribosomal protein L22 like 1 [Source:HGNC Symbol;Acc:HGNC:27610]	FALSE	TRUE	10.5634	1	4	1	High	High	High	High	Phospho [S138(100)]	17.37
High	ENSP00000354720.4	pep chromosome:GRCh38:10:110567691:110604636:1 gene:ENSG00000108055.9 transcript:ENST00000361804.4 gene_biotype:protein_coding transcript_biotype:protein_coding gene_symbol:SMC3 description:structural maintenance of chromosomes 3 [Source:HGNC Symbol;Acc:HGNC:2468]	FALSE	TRUE	1.72555	2	3	2	High	High	High	High	Phospho [S1067(100)]	10.4
High	ENSP00000252818.3	pep chromosome:GRCh38:19:18279694:18281622:-1 gene:ENSG00000130522.6 transcript:ENST00000252818.5 gene_biotype:protein_coding transcript_biotype:protein_coding gene_symbol:JUND description:JunD proto-oncogene, AP-1 transcription factor subunit [Source:HGNC Symbol;Acc:HGNC:6206]	FALSE	TRUE	17.0029	3	4	2	High	High	High	High	Phospho [S90(100); S100(100); S255(100); S259(98.2)]	14.57
High	ENSP00000456568.1	pep chromosome:GRCh38:15:65530490:65576499:1 gene:ENSG00000074696.13 transcript:ENST00000565299.5 gene_biotype:protein_coding transcript_biotype:protein_coding gene_symbol:HACD3 description:3-hydroxyacyl-CoA dehydratase 3 [Source:HGNC Symbol;Acc:HGNC:24175]	FALSE	TRUE	3	1	16	1	High	High	High	High	Phospho [S152(100)]	57.93
High	ENSP00000326128.3	pep chromosome:GRCh38:10:809542:885762:-1 gene:ENSG00000107929.14 transcript:ENST00000316157.7 gene_biotype:protein_coding transcript_biotype:protein_coding gene_symbol:LARP4B description:La ribonucleoprotein domain family member 4B [Source:HGNC Symbol;Acc:HGNC:28987]	FALSE	TRUE	7.99458	3	8	3	High	High	High	High	Phospho [T732(91.4); S736(100)]	11.67
High	ENSP00000409581.2	pep chromosome:GRCh38:11:75260122:75351661:-1 gene:ENSG00000137486.17 transcript:ENST00000420843.7 gene_biotype:protein_coding transcript_biotype:protein_coding gene_symbol:ARRB1 description:arrestin beta 1 [Source:HGNC Symbol;Acc:HGNC:711]	FALSE	TRUE	5.02392	2	4	2	High	High	High	High	Phospho [S412(99.2)]	7.91
High	ENSP00000229390.3	pep chromosome:GRCh38:12:120461672:120469748:-1 gene:ENSG00000111786.9 transcript:ENST00000229390.8 gene_biotype:protein_coding transcript_biotype:protein_coding gene_symbol:SRSF9 description:serine and arginine rich splicing factor 9 [Source:HGNC Symbol;Acc:HGNC:10791]	FALSE	TRUE	13.1222	3	9	3	High	High	High	High	Phospho [S189(76.7); S204(91.9); S211(100); S216(100)]	10.76
High	ENSP00000263377.1	pep chromosome:GRCh38:19:15235519:15280451:-1 gene:ENSG00000141867.17 transcript:ENST00000263377.6 gene_biotype:protein_coding transcript_biotype:protein_coding gene_symbol:BRD4 description:bromodomain containing 4 [Source:HGNC Symbol;Acc:HGNC:13575]	FALSE	TRUE	3.15712	3	4	3	High	High	High	High	Phospho [S470(90.4); S601(100); S1117(100)]	9.35
High	ENSP00000384160.3	pep chromosome:GRCh38:7:155644661:155781480:1 gene:ENSG00000184863.11 transcript:ENST00000401878.8 gene_biotype:protein_coding transcript_biotype:protein_coding gene_symbol:RBM33 description:RNA binding motif protein 33 [Source:HGNC Symbol;Acc:HGNC:27223]	FALSE	TRUE	2.47863	2	3	2	High	High	High	High	Phospho [S205(100); S765(100)]	11.17
High	ENSP00000360985.4	pep chromosome:GRCh38:20:48921711:49036693:1 gene:ENSG00000124198.9 transcript:ENST00000371917.5 gene_biotype:protein_coding transcript_biotype:protein_coding gene_symbol:ARFGEF2 description:ADP ribosylation factor guanine nucleotide exchange factor 2 [Source:HGNC Symbol;Acc:HGNC:15853]	FALSE	TRUE	3.86555	3	6	3	High	High	High	High	Phospho [S227(100); S277(98.9); S617(75.6)]	12.42
High	ENSP00000425956.2	pep chromosome:GRCh38:17:80260866:80395312:1 gene:ENSG00000173821.19 transcript:ENST00000508628.6 gene_biotype:protein_coding transcript_biotype:protein_coding gene_symbol:RNF213 description:ring finger protein 213 [Source:HGNC Symbol;Acc:HGNC:14539]	FALSE	TRUE	0.532725	2	2	2	High	High	High	High	Phospho [S1307(100)]	8.79
High	ENSP00000440945.1	pep chromosome:GRCh38:11:47177540:47185881:-1 gene:ENSG00000165912.16 transcript:ENST00000539589.5 gene_biotype:protein_coding transcript_biotype:protein_coding gene_symbol:PACSIN3 description:protein kinase C and casein kinase substrate in neurons 3 [Source:HGNC Symbol;Acc:HGNC:8572]	FALSE	TRUE	10.3774	2	3	2	High	High	High	High	Phospho [S276(100); S354(98.9)]	15.4
High	ENSP00000265381.3	pep chromosome:GRCh38:9:69427532:69672371:-1 gene:ENSG00000107282.8 transcript:ENST00000265381.7 gene_biotype:protein_coding transcript_biotype:protein_coding gene_symbol:APBA1 description:amyloid beta precursor protein binding family A member 1 [Source:HGNC Symbol;Acc:HGNC:578]	FALSE	TRUE	4.89845	2	5	2	High	High	High	High	Phospho [S568(99.4)]	14.75
High	ENSP00000431355.2	pep chromosome:GRCh38:11:33084595:33161494:-1 gene:ENSG00000176102.13 transcript:ENST00000524827.6 gene_biotype:protein_coding transcript_biotype:protein_coding gene_symbol:CSTF3 description:cleavage stimulation factor subunit 3 [Source:HGNC Symbol;Acc:HGNC:2485]	FALSE	TRUE	1.60214	1	2	1	High	High	High	High	Phospho [S723(100)]	5.77
High	ENSP00000427123.1	pep chromosome:GRCh38:5:34684554:34830807:1 gene:ENSG00000039560.14 transcript:ENST00000515799.5 gene_biotype:protein_coding transcript_biotype:protein_coding gene_symbol:RAI14 description:retinoic acid induced 14 [Source:HGNC Symbol;Acc:HGNC:14873]	FALSE	TRUE	6.9176	4	9	4	High	High	High	High	Phospho [T252(98.8); S330(92.3); S415(90.2)]	13.98
High	ENSP00000341791.2	pep chromosome:GRCh38:12:120578764:120581379:-1 gene:ENSG00000167272.11 transcript:ENST00000341039.6 gene_biotype:protein_coding transcript_biotype:protein_coding gene_symbol:POP5 description:POP5 homolog, ribonuclease P/MRP subunit [Source:HGNC Symbol;Acc:HGNC:17689]	FALSE	TRUE	33.6283	2	3	2	High	High	High	High	Phospho [T56(96.6); S104(100)]	11.31
High	ENSP00000315410.2	pep chromosome:GRCh38:7:24796540:24980178:-1 gene:ENSG00000070882.13 transcript:ENST00000313367.7 gene_biotype:protein_coding transcript_biotype:protein_coding gene_symbol:OSBPL3 description:oxysterol binding protein like 3 [Source:HGNC Symbol;Acc:HGNC:16370]	FALSE	TRUE	5.29876	3	6	3	High	High	High	High	Phospho [S34(100)]	9.99
High	ENSP00000378040.3	pep chromosome:GRCh38:11:64269830:64284639:-1 gene:ENSG00000002330.13 transcript:ENST00000394532.7 gene_biotype:protein_coding transcript_biotype:protein_coding gene_symbol:BAD description:BCL2 associated agonist of cell death [Source:HGNC Symbol;Acc:HGNC:936]	FALSE	TRUE	11.9048	2	3	2	High	High	High	High	Phospho [S118(100); S134(99.8)]	8.1
High	ENSP00000161863.4	pep chromosome:GRCh38:5:113513694:113595284:1 gene:ENSG00000047188.16 transcript:ENST00000161863.9 gene_biotype:protein_coding transcript_biotype:protein_coding gene_symbol:YTHDC2 description:YTH domain containing 2 [Source:HGNC Symbol;Acc:HGNC:24721]	FALSE	TRUE	2.30769	2	3	2	High	High	High	High	Phospho [S1090(99.4); S1202(91.8)]	6.91
High	ENSP00000394510.1	pep chromosome:GRCh38:19:49591182:49626439:1 gene:ENSG00000126464.14 transcript:ENST00000418929.7 gene_biotype:protein_coding transcript_biotype:protein_coding gene_symbol:PRR12 description:proline rich 12 [Source:HGNC Symbol;Acc:HGNC:29217]	FALSE	TRUE	3.43811	4	4	4	High	High	High	High	Phospho [S651(100); S917(100); S1381(99.3); S1382(99.3); T1561(100); S1568(100)]	9.11
High	ENSP00000362947.1	pep chromosome:GRCh38:X:71283633:71301168:1 gene:ENSG00000147140.16 transcript:ENST00000373841.5 gene_biotype:protein_coding transcript_biotype:protein_coding gene_symbol:NONO description:non-POU domain containing octamer binding [Source:HGNC Symbol;Acc:HGNC:7871]	FALSE	TRUE	12.3142	2	2	2	High	High	High	High	Phospho [T450(100)]	7.97
High	ENSP00000364398.4	pep chromosome:GRCh38:9:96450169:96491336:1 gene:ENSG00000130956.14 transcript:ENST00000375249.5 gene_biotype:protein_coding transcript_biotype:protein_coding gene_symbol:HABP4 description:hyaluronan binding protein 4 [Source:HGNC Symbol;Acc:HGNC:17062]	FALSE	TRUE	13.0751	2	3	2	High	High	High	High	Phospho [S108(100); T268(98.4)]	8.98
High	ENSP00000351138.4	pep chromosome:GRCh38:9:129036934:129072082:1 gene:ENSG00000148343.18 transcript:ENST00000358369.8 gene_biotype:protein_coding transcript_biotype:protein_coding gene_symbol:MIGA2 description:mitoguardin 2 [Source:HGNC Symbol;Acc:HGNC:23621]	FALSE	TRUE	2.69815	1	2	1	High	High	High	High	Phospho [S224(100)]	7.98
High	ENSP00000494609.1	pep chromosome:GRCh38:13:95019835:95301451:-1 gene:ENSG00000125257.16 transcript:ENST00000645237.2 gene_biotype:protein_coding transcript_biotype:protein_coding gene_symbol:ABCC4 description:ATP binding cassette subfamily C member 4 [Source:HGNC Symbol;Acc:HGNC:55]	FALSE	TRUE	1.35849	2	4	2	High	High	High	High	Phospho [T646(94.9)]	11.46
High	ENSP00000475486.1	pep chromosome:GRCh38:7:4740859:4755051:1 gene:ENSG00000164916.11 transcript:ENST00000460979.2 gene_biotype:protein_coding transcript_biotype:protein_coding gene_symbol:FOXK1 description:forkhead box K1 [Source:HGNC Symbol;Acc:HGNC:23480]	FALSE	TRUE	33.0275	2	2	1	High	High	High	High	Phospho [S20(100); S106(100)]	8.93
High	ENSP00000467024.1	pep chromosome:GRCh38:19:12945862:12953642:1 gene:ENSG00000179262.10 transcript:ENST00000586534.6 gene_biotype:protein_coding transcript_biotype:protein_coding gene_symbol:RAD23A description:RAD23 homolog A, nucleotide excision repair protein [Source:HGNC Symbol;Acc:HGNC:9812]	FALSE	TRUE	8.26446	1	5	1	High	High	High	High	Phospho [S123(98.5)]	13.99
High	ENSP00000229794.4	pep chromosome:GRCh38:6:36027770:36110755:1 gene:ENSG00000112062.10 transcript:ENST00000229794.8 gene_biotype:protein_coding transcript_biotype:protein_coding gene_symbol:MAPK14 description:mitogen-activated protein kinase 14 [Source:HGNC Symbol;Acc:HGNC:6876]	FALSE	TRUE	3.61111	1	4	1	High	High	High	High	Phospho [Y182(99.7)]	8.72
High	ENSP00000331983.6	pep chromosome:GRCh38:6:25279374:25620530:1 gene:ENSG00000079691.18 transcript:ENST00000329474.7 gene_biotype:protein_coding transcript_biotype:protein_coding gene_symbol:CARMIL1 description:capping protein regulator and myosin 1 linker 1 [Source:HGNC Symbol;Acc:HGNC:21581]	FALSE	TRUE	1.53173	2	4	2	High	High	High	High	Phospho [S1315(92.6); S1360(100)]	10.99
High	ENSP00000433979.1	pep chromosome:GRCh38:8:144104512:144107611:1 gene:ENSG00000179632.10 transcript:ENST00000534585.5 gene_biotype:protein_coding transcript_biotype:protein_coding gene_symbol:MAF1 description:MAF1 homolog, negative regulator of RNA polymerase III [Source:HGNC Symbol;Acc:HGNC:24966]	FALSE	TRUE	5.59441	2	3	2	High	High	High	High	Phospho [S75(100)]	8.47
High	ENSP00000378243.3	pep chromosome:GRCh38:10:73812501:73874591:-1 gene:ENSG00000148660.20 transcript:ENST00000394762.6 gene_biotype:protein_coding transcript_biotype:protein_coding gene_symbol:CAMK2G description:calcium/calmodulin dependent protein kinase II gamma [Source:HGNC Symbol;Acc:HGNC:1463]	FALSE	TRUE	8.34879	3	8	3	High	High	High	High	Phospho [T287(100); S321(97.6); S391(87.5)]	13.09
High	ENSP00000355428.5	pep chromosome:GRCh38:1:248810446:248825915:-1 gene:ENSG00000175137.11 transcript:ENST00000366472.6 gene_biotype:protein_coding transcript_biotype:protein_coding gene_symbol:SH3BP5L description:SH3 binding domain protein 5 like [Source:HGNC Symbol;Acc:HGNC:29360]	FALSE	TRUE	13.2316	3	5	3	High	High	High	High	Phospho [S30(100); S343(100); S350(100)]	16.52
High	ENSP00000265080.4	pep chromosome:GRCh38:5:80960363:81230162:1 gene:ENSG00000113319.13 transcript:ENST00000265080.9 gene_biotype:protein_coding transcript_biotype:protein_coding gene_symbol:RASGRF2 description:Ras protein specific guanine nucleotide releasing factor 2 [Source:HGNC Symbol;Acc:HGNC:9876]	FALSE	TRUE	3.55699	2	3	2	High	High	High	High	Phospho [S794(90); S852(87.6)]	7.8
High	ENSP00000369431.3	pep chromosome:GRCh38:9:26840685:26892802:-1 gene:ENSG00000120159.13 transcript:ENST00000333916.8 gene_biotype:protein_coding transcript_biotype:protein_coding gene_symbol:CAAP1 description:caspase activity and apoptosis inhibitor 1 [Source:HGNC Symbol;Acc:HGNC:25834]	FALSE	TRUE	5.81717	1	2	1	High	High	High	High	Phospho [S203(100)]	10.08
High	ENSP00000384939.3	pep chromosome:GRCh38:2:42169461:42330874:1 gene:ENSG00000143924.19 transcript:ENST00000401738.3 gene_biotype:protein_coding transcript_biotype:protein_coding gene_symbol:EML4 description:EMAP like 4 [Source:HGNC Symbol;Acc:HGNC:1316]	FALSE	TRUE	5.54435	3	4	3	High	High	High	High	Phospho [S146(99.1); S176(100); T910(99.2)]	7.54
High	ENSP00000344322.1	pep chromosome:GRCh38:20:4852358:5001510:-1 gene:ENSG00000089057.15 transcript:ENST00000338244.6 gene_biotype:protein_coding transcript_biotype:protein_coding gene_symbol:SLC23A2 description:solute carrier family 23 member 2 [Source:HGNC Symbol;Acc:HGNC:10973]	FALSE	TRUE	2.61538	1	2	1	High	High	High	High	Phospho [S81(100)]	8.39
High	ENSP00000416015.2	pep chromosome:GRCh38:22:17787649:18024561:-1 gene:ENSG00000243156.9 transcript:ENST00000441493.7 gene_biotype:protein_coding transcript_biotype:protein_coding gene_symbol:MICAL3 description:microtubule associated monooxygenase, calponin and LIM domain containing 3 [Source:HGNC Symbol;Acc:HGNC:24694]	FALSE	TRUE	1.6983	3	7	3	High	High	High	High	Phospho [S685(98.5); S977(100); S1649(93.1)]	7.87
High	ENSP00000427985.2	pep chromosome:GRCh38:8:26514031:26658175:1 gene:ENSG00000092964.18 transcript:ENST00000521913.7 gene_biotype:protein_coding transcript_biotype:protein_coding gene_symbol:DPYSL2 description:dihydropyrimidinase like 2 [Source:HGNC Symbol;Acc:HGNC:3014]	FALSE	TRUE	6.05613	4	6	4	High	High	High	High	Phospho [S27(91.3); T614(100); T619(100); S675(100)]	13.43
High	ENSP00000465231.1	pep chromosome:GRCh38:15:57592014:57714689:1 gene:ENSG00000137878.17 transcript:ENST00000587652.5 gene_biotype:protein_coding transcript_biotype:protein_coding gene_symbol:GCOM1 description:GRINL1A complex locus 1 [Source:HGNC Symbol;Acc:HGNC:26424]	FALSE	TRUE	3.13725	2	3	2	High	High	High	High	Phospho [S667(99.2)]	6.02
High	ENSP00000370003.2	pep chromosome:GRCh38:8:26383054:26413127:1 gene:ENSG00000104765.16 transcript:ENST00000380629.7 gene_biotype:protein_coding transcript_biotype:protein_coding gene_symbol:BNIP3L description:BCL2 interacting protein 3 like [Source:HGNC Symbol;Acc:HGNC:1085]	FALSE	TRUE	10.0457	2	5	2	High	High	High	High	Phospho [S117(93.7); S166(86.1)]	12.85
High	ENSP00000387997.1	pep chromosome:GRCh38:6:99399964:99425331:-1 gene:ENSG00000132424.16 transcript:ENST00000438806.5 gene_biotype:protein_coding transcript_biotype:protein_coding gene_symbol:PNISR description:PNN interacting serine and arginine rich protein [Source:HGNC Symbol;Acc:HGNC:21222]	FALSE	TRUE	4.96894	3	3	2	High	High	High	High	Phospho [S211(100); S290(99.6); S571(100); S573(98.9); S575(90.5)]	9.74
High	ENSP00000270583.4	pep chromosome:GRCh38:16:87707812:87765986:-1 gene:ENSG00000104731.14 transcript:ENST00000270583.10 gene_biotype:protein_coding transcript_biotype:protein_coding gene_symbol:KLHDC4 description:kelch domain containing 4 [Source:HGNC Symbol;Acc:HGNC:25272]	FALSE	TRUE	6.34615	2	3	2	High	High	High	High	Phospho [S418(99.6)]	9.7
High	P02662	Alpha-S1-casein OS=Bos taurus GN=CSN1S1 PE=1 SV=2	TRUE	FALSE	7.47664	1	4	1	High	High	High	High	Phospho [S61(99.7); S63(99.7)]	8.97
High	ENSP00000346986.4	pep chromosome:GRCh38:10:28533118:28623112:1 gene:ENSG00000095787.23 transcript:ENST00000354911.9 gene_biotype:protein_coding transcript_biotype:protein_coding gene_symbol:WAC description:WW domain containing adaptor with coiled-coil [Source:HGNC Symbol;Acc:HGNC:17327]	FALSE	TRUE	4.32767	4	7	4	High	High	High	High	Phospho [S53(100); S64(100); S511(100)]	8.22
High	ENSP00000220913.5	pep chromosome:GRCh38:8:140511322:140517154:1 gene:ENSG00000104472.10 transcript:ENST00000220913.10 gene_biotype:protein_coding transcript_biotype:protein_coding gene_symbol:CHRAC1 description:chromatin accessibility complex subunit 1 [Source:HGNC Symbol;Acc:HGNC:13544]	FALSE	TRUE	17.5573	2	4	2	High	High	High	High	Phospho [S124(100)]	14.54
High	ENSP00000305556.5	pep chromosome:GRCh38:2:70087477:70089203:1 gene:ENSG00000169564.7 transcript:ENST00000303577.7 gene_biotype:protein_coding transcript_biotype:protein_coding gene_symbol:PCBP1 description:poly(rC) binding protein 1 [Source:HGNC Symbol;Acc:HGNC:8647]	FALSE	TRUE	9.55056	2	3	1	High	High	High	High	Phospho [S189(89.9)]	7.5
High	ENSP00000354040.4	pep chromosome:GRCh38:10:988434:1019932:1 gene:ENSG00000107937.19 transcript:ENST00000360803.9 gene_biotype:protein_coding transcript_biotype:protein_coding gene_symbol:GTPBP4 description:GTP binding protein 4 [Source:HGNC Symbol;Acc:HGNC:21535]	FALSE	TRUE	3.3123	1	4	1	High	High	High	High	Phospho [S468(92.4); S470(99.3)]	15.55
High	ENSP00000463939.1	pep chromosome:GRCh38:17:81868260:81871329:-1 gene:ENSG00000141522.12 transcript:ENST00000584461.5 gene_biotype:protein_coding transcript_biotype:protein_coding gene_symbol:ARHGDIA description:Rho GDP dissociation inhibitor alpha [Source:HGNC Symbol;Acc:HGNC:678]	FALSE	TRUE	13.617	3	3	3	High	High	High	High	Phospho [S47(99.6)]	5.77
High	ENSP00000371798.3	pep chromosome:GRCh38:7:5592816:5606655:1 gene:ENSG00000075618.18 transcript:ENST00000382361.8 gene_biotype:protein_coding transcript_biotype:protein_coding gene_symbol:FSCN1 description:fascin actin-bundling protein 1 [Source:HGNC Symbol;Acc:HGNC:11148]	FALSE	TRUE	6.69371	3	3	3	High	High	High	High	Phospho [S38(91.5)]	8.34
High	ENSP00000385442.1	pep chromosome:GRCh38:7:73441565:73522278:-1 gene:ENSG00000009954.11 transcript:ENST00000404251.1 gene_biotype:protein_coding transcript_biotype:protein_coding gene_symbol:BAZ1B description:bromodomain adjacent to zinc finger domain 1B [Source:HGNC Symbol;Acc:HGNC:961]	FALSE	TRUE	3.43898	2	3	2	High	High	High	High	Phospho [S705(99.1); S708(96.1); S1468(100)]	14.48
High	ENSP00000305193.3	pep chromosome:GRCh38:2:20617818:20651098:-1 gene:ENSG00000118960.13 transcript:ENST00000304031.8 gene_biotype:protein_coding transcript_biotype:protein_coding gene_symbol:HS1BP3 description:HCLS1 binding protein 3 [Source:HGNC Symbol;Acc:HGNC:24979]	FALSE	TRUE	9.94898	2	2	2	High	High	High	High	Phospho [S194(100); S249(100)]	9.73
High	ENSP00000342962.3	pep chromosome:GRCh38:6:122443351:122471807:-1 gene:ENSG00000111897.7 transcript:ENST00000339697.5 gene_biotype:protein_coding transcript_biotype:protein_coding gene_symbol:SERINC1 description:serine incorporator 1 [Source:HGNC Symbol;Acc:HGNC:13464]	FALSE	TRUE	2.86976	1	2	1	High	High	High	High	Phospho [S364(100)]	6.49
High	ENSP00000373772.3	pep chromosome:GRCh38:9:101533853:101563344:1 gene:ENSG00000155827.12 transcript:ENST00000389120.8 gene_biotype:protein_coding transcript_biotype:protein_coding gene_symbol:RNF20 description:ring finger protein 20 [Source:HGNC Symbol;Acc:HGNC:10062]	FALSE	TRUE	1.74359	1	2	1	High	High	High	High	Phospho [S138(99.8)]	8
High	ENSP00000375986.4	pep chromosome:GRCh38:6:160991769:161117380:1 gene:ENSG00000085511.20 transcript:ENST00000392142.9 gene_biotype:protein_coding transcript_biotype:protein_coding gene_symbol:MAP3K4 description:mitogen-activated protein kinase kinase kinase 4 [Source:HGNC Symbol;Acc:HGNC:6856]	FALSE	TRUE	2.23881	2	3	2	High	High	High	High	Phospho [S66(87.4); S72(97.5); S84(97.4); S1251(92.8)]	11.35
High	ENSP00000449273.1	pep chromosome:GRCh38:12:32399529:32640533:1 gene:ENSG00000139132.14 transcript:ENST00000534526.6 gene_biotype:protein_coding transcript_biotype:protein_coding gene_symbol:FGD4 description:FYVE, RhoGEF and PH domain containing 4 [Source:HGNC Symbol;Acc:HGNC:19125]	FALSE	TRUE	3.76523	2	3	2	High	High	High	High	Phospho [S278(99.8); S839(100)]	7.1
High	ENSP00000362993.3	pep chromosome:GRCh38:10:58512872:58831435:1 gene:ENSG00000122870.12 transcript:ENST00000373886.8 gene_biotype:protein_coding transcript_biotype:protein_coding gene_symbol:BICC1 description:BicC family RNA binding protein 1 [Source:HGNC Symbol;Acc:HGNC:19351]	FALSE	TRUE	4.72279	3	4	3	High	High	High	High	Phospho [S633(99.8); S679(91.9); S801(88.1)]	9.77
High	ENSP00000281513.5	pep chromosome:GRCh38:2:15166916:15561334:-1 gene:ENSG00000151779.13 transcript:ENST00000281513.10 gene_biotype:protein_coding transcript_biotype:protein_coding gene_symbol:NBAS description:neuroblastoma amplified sequence [Source:HGNC Symbol;Acc:HGNC:15625]	FALSE	TRUE	0.843526	1	4	1	High	High	High	High	Phospho [S475(93.6)]	11.38
High	ENSP00000338258.3	pep chromosome:GRCh38:17:73283624:73312001:-1 gene:ENSG00000179604.10 transcript:ENST00000335793.4 gene_biotype:protein_coding transcript_biotype:protein_coding gene_symbol:CDC42EP4 description:CDC42 effector protein 4 [Source:HGNC Symbol;Acc:HGNC:17147]	FALSE	TRUE	5.33708	1	2	1	High	High	High	High	Phospho [S64(100)]	8.02
High	ENSP00000393840.1	pep chromosome:GRCh38:19:45178745:45181801:1 gene:ENSG00000189114.7 transcript:ENST00000433642.2 gene_biotype:protein_coding transcript_biotype:protein_coding gene_symbol:BLOC1S3 description:biogenesis of lysosomal organelles complex 1 subunit 3 [Source:HGNC Symbol;Acc:HGNC:20914]	FALSE	TRUE	11.3861	1	3	1	High	High	High	High	Phospho [S65(99.9)]	13.28
High	ENSP00000363092.4	pep chromosome:GRCh38:10:51074487:52298350:1 gene:ENSG00000185532.19 transcript:ENST00000373980.10 gene_biotype:protein_coding transcript_biotype:protein_coding gene_symbol:PRKG1 description:protein kinase cGMP-dependent 1 [Source:HGNC Symbol;Acc:HGNC:9414]	FALSE	TRUE	4.51895	3	6	3	High	High	High	High	Phospho [S64(99.8); T530(94.2)]	10.22
High	ENSP00000252891.3	pep chromosome:GRCh38:19:40665905:40690651:-1 gene:ENSG00000105245.9 transcript:ENST00000252891.8 gene_biotype:protein_coding transcript_biotype:protein_coding gene_symbol:NUMBL description:NUMB like endocytic adaptor protein [Source:HGNC Symbol;Acc:HGNC:8061]	FALSE	TRUE	6.56814	3	6	3	High	High	High	High	Phospho [S263(85.9); S411(100)]	10
High	ENSP00000315379.6	pep chromosome:GRCh38:1:150321533:150353233:1 gene:ENSG00000117360.13 transcript:ENST00000324862.7 gene_biotype:protein_coding transcript_biotype:protein_coding gene_symbol:PRPF3 description:pre-mRNA processing factor 3 [Source:HGNC Symbol;Acc:HGNC:17348]	FALSE	TRUE	2.04978	2	3	2	High	High	High	High	Phospho [S619(100)]	6.35
High	ENSP00000379931.1	pep chromosome:GRCh38:3:23203327:23591794:1 gene:ENSG00000182247.10 transcript:ENST00000396703.6 gene_biotype:protein_coding transcript_biotype:protein_coding gene_symbol:UBE2E2 description:ubiquitin conjugating enzyme E2 E2 [Source:HGNC Symbol;Acc:HGNC:12478]	FALSE	TRUE	8.45771	1	7	1	High	High	High	High	Phospho [S11(100)]	11.37
High	P31096	Osteopontin OS=Bos taurus GN=SPP1 PE=1 SV=2	TRUE	FALSE	17.6259	3	5	3	High	High	High	High	Phospho [S210(95); S275(99.3)]	7.43
High	ENSP00000259021.4	pep chromosome:GRCh38:17:49788681:49835026:1 gene:ENSG00000136504.12 transcript:ENST00000259021.9 gene_biotype:protein_coding transcript_biotype:protein_coding gene_symbol:KAT7 description:lysine acetyltransferase 7 [Source:HGNC Symbol;Acc:HGNC:17016]	FALSE	TRUE	4.41899	2	4	2	High	High	High	High	Phospho [S100(84.2)]	9.97
High	ENSP00000300651.6	pep chromosome:GRCh38:17:39404285:39451263:-1 gene:ENSG00000125686.12 transcript:ENST00000300651.11 gene_biotype:protein_coding transcript_biotype:protein_coding gene_symbol:MED1 description:mediator complex subunit 1 [Source:HGNC Symbol;Acc:HGNC:9234]	FALSE	TRUE	2.90955	3	5	3	High	High	High	High	Phospho [T805(100); T1051(94.3)]	10.64
High	ENSP00000328773.2	pep chromosome:GRCh38:17:45148502:45152101:1 gene:ENSG00000186834.3 transcript:ENST00000332499.3 gene_biotype:protein_coding transcript_biotype:protein_coding gene_symbol:HEXIM1 description:HEXIM P-TEFb complex subunit 1 [Source:HGNC Symbol;Acc:HGNC:24953]	FALSE	TRUE	9.1922	1	3	1	Not Found	Not Found	High	Not Found	Phospho [S252(100)]	13.71
High	ENSP00000338785.4	pep chromosome:GRCh38:13:33103137:33285755:-1 gene:ENSG00000133121.21 transcript:ENST00000336934.10 gene_biotype:protein_coding transcript_biotype:protein_coding gene_symbol:STARD13 description:StAR related lipid transfer domain containing 13 [Source:HGNC Symbol;Acc:HGNC:19164]	FALSE	TRUE	2.15633	3	4	3	High	High	High	High	Phospho [S133(100); T547(94.7)]	9.2
High	ENSP00000354487.5	pep chromosome:GRCh38:10:31319172:31529813:1 gene:ENSG00000148516.21 transcript:ENST00000361642.9 gene_biotype:protein_coding transcript_biotype:protein_coding gene_symbol:ZEB1 description:zinc finger E-box binding homeobox 1 [Source:HGNC Symbol;Acc:HGNC:11642]	FALSE	TRUE	3.02222	2	7	2	High	High	High	High	Phospho [S888(91.6); S1019(92.7)]	14.59
High	ENSP00000314193.4	pep chromosome:GRCh38:2:189441474:189475552:1 gene:ENSG00000115368.10 transcript:ENST00000314761.9 gene_biotype:protein_coding transcript_biotype:protein_coding gene_symbol:WDR75 description:WD repeat domain 75 [Source:HGNC Symbol;Acc:HGNC:25725]	FALSE	TRUE	3.13253	1	2	1	High	High	High	High	Phospho [S779(100); S782(100)]	10.06
High	ENSP00000251993.7	pep chromosome:GRCh38:22:45195828:45212488:-1 gene:ENSG00000100364.18 transcript:ENST00000251993.11 gene_biotype:protein_coding transcript_biotype:protein_coding gene_symbol:KIAA0930 description:KIAA0930 [Source:HGNC Symbol;Acc:HGNC:1314]	FALSE	TRUE	12.4694	4	4	4	High	High	High	High	Phospho [S272(90.5); S284(100); S309(86.6); S356(100); S367(100)]	8.93
High	ENSP00000312634.7	pep chromosome:GRCh38:8:22578741:22594298:1 gene:ENSG00000120913.23 transcript:ENST00000308354.11 gene_biotype:protein_coding transcript_biotype:protein_coding gene_symbol:PDLIM2 description:PDZ and LIM domain 2 [Source:HGNC Symbol;Acc:HGNC:13992]	FALSE	TRUE	6.14618	2	2	2	High	High	High	High	Phospho [S447(100); S516(99.9)]	6.46
High	ENSP00000240316.4	pep chromosome:GRCh38:17:56938199:56961050:-1 gene:ENSG00000121058.5 transcript:ENST00000240316.5 gene_biotype:protein_coding transcript_biotype:protein_coding gene_symbol:COIL description:coilin [Source:HGNC Symbol;Acc:HGNC:2184]	FALSE	TRUE	5.20833	2	3	2	High	High	High	High	Phospho [T122(100)]	9.24
High	ENSP00000298492.5	pep chromosome:GRCh38:10:124801819:124836667:1 gene:ENSG00000165660.8 transcript:ENST00000298492.6 gene_biotype:protein_coding transcript_biotype:protein_coding gene_symbol:ABRAXAS2 description:abraxas 2, BRISC complex subunit [Source:HGNC Symbol;Acc:HGNC:28975]	FALSE	TRUE	7.71084	1	4	1	High	High	High	High	Phospho [S368(100); S372(100); S375(100)]	11.16
High	ENSP00000320485.7	pep chromosome:GRCh38:1:26696015:26782104:1 gene:ENSG00000117713.20 transcript:ENST00000324856.13 gene_biotype:protein_coding transcript_biotype:protein_coding gene_symbol:ARID1A description:AT-rich interaction domain 1A [Source:HGNC Symbol;Acc:HGNC:11110]	FALSE	TRUE	1.75055	2	7	2	High	High	High	High	Phospho [S363(100); S1755(93.3)]	14.69
High	ENSP00000272139.4	pep chromosome:GRCh38:1:228100731:228103325:-1 gene:ENSG00000143793.13 transcript:ENST00000272139.5 gene_biotype:protein_coding transcript_biotype:protein_coding gene_symbol:C1orf35 description:chromosome 1 open reading frame 35 [Source:HGNC Symbol;Acc:HGNC:19032]	FALSE	TRUE	6.08365	1	6	1	High	High	High	High	Phospho [T219(94.1)]	8.46
High	ENSP00000463042.1	pep chromosome:GRCh38:17:58004588:58007261:-1 gene:ENSG00000136450.13 transcript:ENST00000584773.5 gene_biotype:protein_coding transcript_biotype:protein_coding gene_symbol:SRSF1 description:serine and arginine rich splicing factor 1 [Source:HGNC Symbol;Acc:HGNC:10780]	FALSE	TRUE	11.0672	4	10	3	High	High	High	High	Phospho [S199(99.8); S225(96.2); S234(99.3); S238(92.7)]	13.62
High	ENSP00000435933.1	pep chromosome:GRCh38:1:171701092:171742060:-1 gene:ENSG00000117533.15 transcript:ENST00000474047.5 gene_biotype:protein_coding transcript_biotype:nonsense_mediated_decay gene_symbol:VAMP4 description:vesicle associated membrane protein 4 [Source:HGNC Symbol;Acc:HGNC:12645]	FALSE	TRUE	12.0567	2	3	2	High	High	High	High	Phospho [S30(100)]	11.71
High	ENSP00000253108.3	pep chromosome:GRCh38:19:10115014:10119899:-1 gene:ENSG00000130811.12 transcript:ENST00000253108.9 gene_biotype:protein_coding transcript_biotype:protein_coding gene_symbol:EIF3G description:eukaryotic translation initiation factor 3 subunit G [Source:HGNC Symbol;Acc:HGNC:3274]	FALSE	TRUE	7.8125	1	6	1	High	High	High	High	Phospho [S42(99.4)]	14.16
High	ENSP00000005340.4	pep chromosome:GRCh38:17:7225342:7234517:-1 gene:ENSG00000004975.12 transcript:ENST00000005340.10 gene_biotype:protein_coding transcript_biotype:protein_coding gene_symbol:DVL2 description:dishevelled segment polarity protein 2 [Source:HGNC Symbol;Acc:HGNC:3086]	FALSE	TRUE	2.30978	2	6	2	High	High	High	High	Phospho [S616(91.2)]	7.44
High	ENSP00000256196.4	pep chromosome:GRCh38:11:14277922:14359183:-1 gene:ENSG00000133818.14 transcript:ENST00000256196.9 gene_biotype:protein_coding transcript_biotype:protein_coding gene_symbol:RRAS2 description:RAS related 2 [Source:HGNC Symbol;Acc:HGNC:17271]	FALSE	TRUE	7.35294	2	4	2	High	High	High	High	Phospho [S186(100)]	10.77
High	ENSP00000324287.6	pep chromosome:GRCh38:3:195274745:195443020:-1 gene:ENSG00000114331.15 transcript:ENST00000326793.11 gene_biotype:protein_coding transcript_biotype:protein_coding gene_symbol:ACAP2 description:ArfGAP with coiled-coil, ankyrin repeat and PH domains 2 [Source:HGNC Symbol;Acc:HGNC:16469]	FALSE	TRUE	2.05656	2	3	2	High	High	High	High	Phospho [S379(93.4)]	7.09
High	ENSP00000471914.1	pep chromosome:GRCh38:19:18153158:18178117:1 gene:ENSG00000268173.3 transcript:ENST00000593731.1 gene_biotype:protein_coding transcript_biotype:nonsense_mediated_decay gene_symbol:AC007192.1 description:novel protein, readthrough between PIK3R2 and IFI30	FALSE	TRUE	5.63187	2	3	2	High	High	High	High	Phospho [Y464(95)]	8.61
High	ENSP00000371051.2	pep chromosome:GRCh38:17:4004445:4143030:-1 gene:ENSG00000074755.15 transcript:ENST00000381638.7 gene_biotype:protein_coding transcript_biotype:protein_coding gene_symbol:ZZEF1 description:zinc finger ZZ-type and EF-hand domain containing 1 [Source:HGNC Symbol;Acc:HGNC:29027]	FALSE	TRUE	1.82371	3	4	3	High	High	High	High	Phospho [S1518(99.9); S1540(100); S2444(85.8)]	11.29
High	ENSP00000264183.3	pep chromosome:GRCh38:1:235166902:235328179:-1 gene:ENSG00000054267.22 transcript:ENST00000264183.9 gene_biotype:protein_coding transcript_biotype:protein_coding gene_symbol:ARID4B description:AT-rich interaction domain 4B [Source:HGNC Symbol;Acc:HGNC:15550]	FALSE	TRUE	1.44817	2	2	2	High	High	High	High	Phospho [S790(100); T793(99.9)]	10.2
High	ENSP00000374574.2	pep chromosome:GRCh38:17:63774170:63819317:1 gene:ENSG00000198231.13 transcript:ENST00000389924.7 gene_biotype:protein_coding transcript_biotype:protein_coding gene_symbol:DDX42 description:DEAD-box helicase 42 [Source:HGNC Symbol;Acc:HGNC:18676]	FALSE	TRUE	6.92964	2	3	2	High	High	High	High	Phospho [S96(90.1)]	10.18
High	ENSP00000263857.6	pep chromosome:GRCh38:2:86020216:86105886:-1 gene:ENSG00000068654.16 transcript:ENST00000263857.11 gene_biotype:protein_coding transcript_biotype:protein_coding gene_symbol:POLR1A description:RNA polymerase I subunit A [Source:HGNC Symbol;Acc:HGNC:17264]	FALSE	TRUE	1.80233	2	6	2	High	High	High	High	Phospho [Y1427(88.5)]	9.84
High	ENSP00000229328.5	pep chromosome:GRCh38:12:119668133:119681619:1 gene:ENSG00000111725.11 transcript:ENST00000229328.10 gene_biotype:protein_coding transcript_biotype:protein_coding gene_symbol:PRKAB1 description:protein kinase AMP-activated non-catalytic subunit beta 1 [Source:HGNC Symbol;Acc:HGNC:9378]	FALSE	TRUE	12.963	3	7	3	High	High	High	High	Phospho [S24(95.4)]	9.78
High	ENSP00000376097.2	pep chromosome:GRCh38:19:29942239:30016612:1 gene:ENSG00000105176.18 transcript:ENST00000392271.6 gene_biotype:protein_coding transcript_biotype:protein_coding gene_symbol:URI1 description:URI1 prefoldin like chaperone [Source:HGNC Symbol;Acc:HGNC:13236]	FALSE	TRUE	4.85981	1	3	1	High	High	High	High	Phospho [S442(92.1)]	11.63
High	ENSP00000342905.3	pep chromosome:GRCh38:20:50890349:50909791:-1 gene:ENSG00000101126.17 transcript:ENST00000349014.8 gene_biotype:protein_coding transcript_biotype:protein_coding gene_symbol:ADNP description:activity dependent neuroprotector homeobox [Source:HGNC Symbol;Acc:HGNC:15766]	FALSE	TRUE	1.72414	1	2	1	High	High	High	High	Phospho [S953(100); S955(100)]	8.42
High	ENSP00000313391.6	pep chromosome:GRCh38:5:39371677:39424980:-1 gene:ENSG00000153071.15 transcript:ENST00000320816.11 gene_biotype:protein_coding transcript_biotype:protein_coding gene_symbol:DAB2 description:DAB adaptor protein 2 [Source:HGNC Symbol;Acc:HGNC:2662]	FALSE	TRUE	4.80519	2	6	2	High	High	High	High	Phospho [S227(90.3); S401(100)]	15.3
High	ENSP00000414055.2	pep chromosome:GRCh38:8:143833583:143840973:-1 gene:ENSG00000185189.18 transcript:ENST00000442628.7 gene_biotype:protein_coding transcript_biotype:protein_coding gene_symbol:NRBP2 description:nuclear receptor binding protein 2 [Source:HGNC Symbol;Acc:HGNC:19339]	FALSE	TRUE	6.78643	3	4	3	High	High	High	High	Phospho [S22(100); T411(99.2)]	14.57
High	ENSP00000307265.3	pep chromosome:GRCh38:19:45883608:45886141:-1 gene:ENSG00000170604.5 transcript:ENST00000302165.5 gene_biotype:protein_coding transcript_biotype:protein_coding gene_symbol:IRF2BP1 description:interferon regulatory factor 2 binding protein 1 [Source:HGNC Symbol;Acc:HGNC:21728]	FALSE	TRUE	5.47945	2	3	2	High	High	High	High	Phospho [S384(100); S453(100)]	14.25
High	ENSP00000379709.2	pep chromosome:GRCh38:10:24583614:24723887:-1 gene:ENSG00000107863.18 transcript:ENST00000396432.7 gene_biotype:protein_coding transcript_biotype:protein_coding gene_symbol:ARHGAP21 description:Rho GTPase activating protein 21 [Source:HGNC Symbol;Acc:HGNC:23725]	FALSE	TRUE	2.34934	3	5	3	High	High	High	High	Phospho [S1431; S1432; S1433; S1669(99.8); S1861(83.9)]	10.56
High	ENSP00000307513.5	pep chromosome:GRCh38:17:62627670:62693597:1 gene:ENSG00000011028.14 transcript:ENST00000303375.10 gene_biotype:protein_coding transcript_biotype:protein_coding gene_symbol:MRC2 description:mannose receptor C type 2 [Source:HGNC Symbol;Acc:HGNC:16875]	FALSE	TRUE	0.743746	1	13	1	High	High	High	High	Phospho [S1458(100)]	24.07
High	ENSP00000350170.3	pep chromosome:GRCh38:3:180912670:180982753:1 gene:ENSG00000114416.18 transcript:ENST00000357559.9 gene_biotype:protein_coding transcript_biotype:protein_coding gene_symbol:FXR1 description:FMR1 autosomal homolog 1 [Source:HGNC Symbol;Acc:HGNC:4023]	FALSE	TRUE	4.02576	1	3	1	High	High	High	High	Phospho [S406(100); S409(98)]	5.2
High	ENSP00000382697.1	pep chromosome:GRCh38:18:20946906:21111813:-1 gene:ENSG00000067900.8 transcript:ENST00000399799.3 gene_biotype:protein_coding transcript_biotype:protein_coding gene_symbol:ROCK1 description:Rho associated coiled-coil containing protein kinase 1 [Source:HGNC Symbol;Acc:HGNC:10251]	FALSE	TRUE	1.99409	1	2	1	High	High	High	High	Phospho [S1105(95.7)]	8.25
High	ENSP00000257181.8	pep chromosome:GRCh38:1:52404602:52420836:1 gene:ENSG00000134748.13 transcript:ENST00000257181.10 gene_biotype:protein_coding transcript_biotype:protein_coding gene_symbol:PRPF38A description:pre-mRNA processing factor 38A [Source:HGNC Symbol;Acc:HGNC:25930]	FALSE	TRUE	10.5769	2	4	2	High	High	High	High	Phospho [S193(100); S194(100); S209(100)]	10.85
High	ENSP00000431391.1	pep chromosome:GRCh38:11:43311996:43344529:1 gene:ENSG00000166181.13 transcript:ENST00000531273.6 gene_biotype:protein_coding transcript_biotype:protein_coding gene_symbol:API5 description:apoptosis inhibitor 5 [Source:HGNC Symbol;Acc:HGNC:594]	FALSE	TRUE	2.48092	2	6	2	High	High	High	High	Phospho [S464(100)]	4.12
High	ENSP00000376162.2	pep chromosome:GRCh38:19:18929203:18941217:-1 gene:ENSG00000051128.19 transcript:ENST00000392351.8 gene_biotype:protein_coding transcript_biotype:protein_coding gene_symbol:HOMER3 description:homer scaffold protein 3 [Source:HGNC Symbol;Acc:HGNC:17514]	FALSE	TRUE	8.58726	2	2	2	High	High	High	High	Phospho [S159(100); S256(100)]	7.71
High	ENSP00000366604.1	pep chromosome:GRCh38:11:64764606:64778469:-1 gene:ENSG00000168066.20 transcript:ENST00000377387.5 gene_biotype:protein_coding transcript_biotype:protein_coding gene_symbol:SF1 description:splicing factor 1 [Source:HGNC Symbol;Acc:HGNC:12950]	FALSE	TRUE	3.8633	1	6	1	High	High	High	High	Phospho [S205(100); S207(100)]	22.76
High	ENSP00000419412.1	pep chromosome:GRCh38:7:151058212:151076526:1 gene:ENSG00000164889.14 transcript:ENST00000485713.5 gene_biotype:protein_coding transcript_biotype:protein_coding gene_symbol:SLC4A2 description:solute carrier family 4 member 2 [Source:HGNC Symbol;Acc:HGNC:11028]	FALSE	TRUE	4.35133	3	5	3	High	High	High	High	Phospho [S113(77.9)]	8.8
High	ENSP00000495622.1	pep chromosome:GRCh38:CHR_HG2334_PATCH:87863440:87966341:1 gene:ENSG00000284792.1 transcript:ENST00000645317.1 gene_biotype:protein_coding transcript_biotype:protein_coding gene_symbol:PTEN description:phosphatase and tensin homolog [Source:HGNC Symbol;Acc:HGNC:9588]	FALSE	TRUE	4.16667	1	3	1	High	High	High	High	Phospho [T555(90.7); S558(99.9)]	9.81
High	ENSP00000319829.5	pep chromosome:GRCh38:1:151282312:151291903:1 gene:ENSG00000143373.18 transcript:ENST00000324048.9 gene_biotype:protein_coding transcript_biotype:protein_coding gene_symbol:ZNF687 description:zinc finger protein 687 [Source:HGNC Symbol;Acc:HGNC:29277]	FALSE	TRUE	3.9612	2	4	2	High	High	High	High	Phospho [S253(98.7)]	7.19
High	ENSP00000418529.1	pep chromosome:GRCh38:20:1442162:1466918:-1 gene:ENSG00000088833.17 transcript:ENST00000476071.5 gene_biotype:protein_coding transcript_biotype:protein_coding gene_symbol:NSFL1C description:NSFL1 cofactor [Source:HGNC Symbol;Acc:HGNC:15912]	FALSE	TRUE	3.49462	1	2	1	High	High	High	High	Phospho [S116(100)]	6.15
High	ENSP00000265071.2	pep chromosome:GRCh38:5:31193686:31329146:1 gene:ENSG00000113361.13 transcript:ENST00000265071.3 gene_biotype:protein_coding transcript_biotype:protein_coding gene_symbol:CDH6 description:cadherin 6 [Source:HGNC Symbol;Acc:HGNC:1765]	FALSE	TRUE	1.77215	1	2	1	High	High	High	High	Phospho [S786(100)]	8.49
High	ENSP00000459007.1	pep chromosome:GRCh38:16:30851246:30893942:-1 gene:ENSG00000099385.11 transcript:ENST00000572628.5 gene_biotype:protein_coding transcript_biotype:protein_coding gene_symbol:BCL7C description:BAF chromatin remodeling complex subunit BCL7C [Source:HGNC Symbol;Acc:HGNC:1006]	FALSE	TRUE	11.2628	1	4	1	High	High	High	High	Phospho [S114(98.2); S126(100)]	9.65
High	ENSP00000358857.4	pep chromosome:GRCh38:X:154379197:154381523:1 gene:ENSG00000102119.10 transcript:ENST00000369842.8 gene_biotype:protein_coding transcript_biotype:protein_coding gene_symbol:EMD description:emerin [Source:HGNC Symbol;Acc:HGNC:3331]	FALSE	TRUE	21.2598	2	5	2	High	High	High	High	Phospho [S49(100)]	7.42
High	ENSP00000243326.4	pep chromosome:GRCh38:2:151409941:151482172:1 gene:ENSG00000080345.18 transcript:ENST00000243326.9 gene_biotype:protein_coding transcript_biotype:protein_coding gene_symbol:RIF1 description:replication timing regulatory factor 1 [Source:HGNC Symbol;Acc:HGNC:23207]	FALSE	TRUE	1.09223	2	2	2	High	High	High	High	Phospho [S1579(99.6); S1688(100)]	6.78
High	ENSP00000296088.7	pep chromosome:GRCh38:3:43286540:43351143:1 gene:ENSG00000163788.14 transcript:ENST00000296088.12 gene_biotype:protein_coding transcript_biotype:protein_coding gene_symbol:SNRK description:SNF related kinase [Source:HGNC Symbol;Acc:HGNC:30598]	FALSE	TRUE	6.01307	2	5	2	High	High	High	High	Phospho [S544(92.7); S607(99)]	8.56
High	ENSP00000380054.2	pep chromosome:GRCh38:3:15427598:15442613:1 gene:ENSG00000144597.14 transcript:ENST00000396842.7 gene_biotype:protein_coding transcript_biotype:protein_coding gene_symbol:EAF1 description:ELL associated factor 1 [Source:HGNC Symbol;Acc:HGNC:20907]	FALSE	TRUE	5.22388	1	2	1	High	High	High	High	Phospho [S266(100)]	7.74
High	ENSP00000313420.3	pep chromosome:GRCh38:8:47773108:47960183:-1 gene:ENSG00000253729.7 transcript:ENST00000314191.6 gene_biotype:protein_coding transcript_biotype:protein_coding gene_symbol:PRKDC description:protein kinase, DNA-activated, catalytic subunit [Source:HGNC Symbol;Acc:HGNC:9413]	FALSE	TRUE	0.508721	1	3	1	High	High	High	High	Phospho [S3205(100)]	6.48
High	ENSP00000466214.1	pep chromosome:GRCh38:19:32581190:32587453:1 gene:ENSG00000105185.12 transcript:ENST00000590247.7 gene_biotype:protein_coding transcript_biotype:protein_coding gene_symbol:PDCD5 description:programmed cell death 5 [Source:HGNC Symbol;Acc:HGNC:8764]	FALSE	TRUE	8.8	2	8	2	High	High	High	High	Phospho [S119(100)]	16.61
High	ENSP00000305918.6	pep chromosome:GRCh38:9:134030305:134068026:-1 gene:ENSG00000169925.17 transcript:ENST00000303407.12 gene_biotype:protein_coding transcript_biotype:protein_coding gene_symbol:BRD3 description:bromodomain containing 3 [Source:HGNC Symbol;Acc:HGNC:1104]	FALSE	TRUE	1.51515	1	2	1	High	High	High	High	Phospho [S263(95.9)]	5.68
High	ENSP00000413098.2	pep chromosome:GRCh38:6:154733378:154834244:1 gene:ENSG00000213079.9 transcript:ENST00000417268.3 gene_biotype:protein_coding transcript_biotype:protein_coding gene_symbol:SCAF8 description:SR-related CTD associated factor 8 [Source:HGNC Symbol;Acc:HGNC:20959]	FALSE	TRUE	1.92735	3	3	3	High	High	High	High	Phospho [S695(100)]	6.07
High	ENSP00000383402.3	pep chromosome:GRCh38:18:9546791:9614558:-1 gene:ENSG00000154845.15 transcript:ENST00000400556.7 gene_biotype:protein_coding transcript_biotype:protein_coding gene_symbol:PPP4R1 description:protein phosphatase 4 regulatory subunit 1 [Source:HGNC Symbol;Acc:HGNC:9320]	FALSE	TRUE	1.36842	1	3	1	High	High	High	High	Phospho [S947(96)]	11.48
High	ENSP00000472305.1	pep chromosome:GRCh38:19:7516103:7521025:1 gene:ENSG00000198816.7 transcript:ENST00000597229.2 gene_biotype:protein_coding transcript_biotype:protein_coding gene_symbol:ZNF358 description:zinc finger protein 358 [Source:HGNC Symbol;Acc:HGNC:16838]	FALSE	TRUE	7.21831	2	2	2	High	High	High	High	Phospho [S487(92.3); S545; S553]	6.47
High	ENSP00000335341.6	pep chromosome:GRCh38:1:226989865:227317714:-1 gene:ENSG00000143776.18 transcript:ENST00000334218.9 gene_biotype:protein_coding transcript_biotype:protein_coding gene_symbol:CDC42BPA description:CDC42 binding protein kinase alpha [Source:HGNC Symbol;Acc:HGNC:1737]	FALSE	TRUE	2.59815	3	5	3	High	High	High	High	Phospho [S1651(91.7); S1671(85.5); S1672(85.5); S1721(98.8)]	13.28
High	ENSP00000331901.4	pep chromosome:GRCh38:11:62559596:62573891:-1 gene:ENSG00000254772.10 transcript:ENST00000329251.5 gene_biotype:protein_coding transcript_biotype:protein_coding gene_symbol:EEF1G description:eukaryotic translation elongation factor 1 gamma [Source:HGNC Symbol;Acc:HGNC:3213]	FALSE	TRUE	12.8146	5	5	5	High	High	High	High	Phospho [T46(100)]	11.71
High	ENSP00000407093.2	pep chromosome:GRCh38:CHR_HSCHR6_MHC_MANN_CTG1:33354706:33358319:1 gene:ENSG00000227402.11 transcript:ENST00000443773.6 gene_biotype:protein_coding transcript_biotype:protein_coding gene_symbol:SLC39A7 description:solute carrier family 39 member 7 [Source:HGNC Symbol;Acc:HGNC:4927]	FALSE	TRUE	2.77186	2	8	2	High	High	High	High	Phospho [S275(100)]	0
High	ENSP00000391278.3	pep chromosome:GRCh38:17:76734252:76737331:-1 gene:ENSG00000161547.16 transcript:ENST00000452355.7 gene_biotype:protein_coding transcript_biotype:nonsense_mediated_decay gene_symbol:SRSF2 description:serine and arginine rich splicing factor 2 [Source:HGNC Symbol;Acc:HGNC:10783]	FALSE	TRUE	17.1946	5	6	4	High	High	High	High	Phospho [S26(93.7); S119(100); S121(100); S189(100); S191(100); S208(83.2)]	9.92
High	ENSP00000234160.4	pep chromosome:GRCh38:2:170929253:170967130:1 gene:ENSG00000115806.13 transcript:ENST00000234160.5 gene_biotype:protein_coding transcript_biotype:protein_coding gene_symbol:GORASP2 description:golgi reassembly stacking protein 2 [Source:HGNC Symbol;Acc:HGNC:17500]	FALSE	TRUE	9.0708	2	5	2	High	High	High	High	Phospho [T415(100); T433(89.4)]	11.58
High	ENSP00000265276.4	pep chromosome:GRCh38:10:112149865:112183765:-1 gene:ENSG00000119927.14 transcript:ENST00000348367.9 gene_biotype:protein_coding transcript_biotype:protein_coding gene_symbol:GPAM description:glycerol-3-phosphate acyltransferase, mitochondrial [Source:HGNC Symbol;Acc:HGNC:24865]	FALSE	TRUE	2.77778	2	2	2	High	High	High	High	Phospho [S695(100)]	7.79
High	ENSP00000364912.3	pep chromosome:GRCh38:1:15847707:15940456:1 gene:ENSG00000065526.11 transcript:ENST00000375759.8 gene_biotype:protein_coding transcript_biotype:protein_coding gene_symbol:SPEN description:spen family transcriptional repressor [Source:HGNC Symbol;Acc:HGNC:17575]	FALSE	TRUE	0.873362	2	2	2	High	High	High	High	Phospho [S736(100); S740(100); S1380(100); S1382(100)]	6.92
High	ENSP00000341805.4	pep chromosome:GRCh38:6:169703902:169724500:-1 gene:ENSG00000130024.15 transcript:ENST00000339209.9 gene_biotype:protein_coding transcript_biotype:protein_coding gene_symbol:PHF10 description:PHD finger protein 10 [Source:HGNC Symbol;Acc:HGNC:18250]	FALSE	TRUE	5.42169	1	2	1	High	High	High	High	Phospho [S327(100)]	9.51
High	ENSP00000264606.3	pep chromosome:GRCh38:2:239048168:239400949:-1 gene:ENSG00000068024.16 transcript:ENST00000345617.7 gene_biotype:protein_coding transcript_biotype:protein_coding gene_symbol:HDAC4 description:histone deacetylase 4 [Source:HGNC Symbol;Acc:HGNC:14063]	FALSE	TRUE	2.02952	2	2	2	High	High	High	High	Phospho [S565(100)]	6.7
High	ENSP00000385410.1	pep chromosome:GRCh38:10:102152176:102163871:1 gene:ENSG00000166197.16 transcript:ENST00000405356.5 gene_biotype:protein_coding transcript_biotype:protein_coding gene_symbol:NOLC1 description:nucleolar and coiled-body phosphoprotein 1 [Source:HGNC Symbol;Acc:HGNC:15608]	FALSE	TRUE	1.69252	2	3	2	High	High	High	High	Phospho [S573(100)]	5.63
High	ENSP00000346694.4	pep chromosome:GRCh38:7:26189927:26200746:-1 gene:ENSG00000122566.21 transcript:ENST00000354667.8 gene_biotype:protein_coding transcript_biotype:protein_coding gene_symbol:HNRNPA2B1 description:heterogeneous nuclear ribonucleoprotein A2/B1 [Source:HGNC Symbol;Acc:HGNC:5033]	FALSE	TRUE	12.7479	3	4	3	High	High	High	High	Phospho [S231; Y234; S236]	11.54
High	ENSP00000495070.1	pep chromosome:GRCh38:14:21385495:21437308:-1 gene:ENSG00000100888.13 transcript:ENST00000643469.1 gene_biotype:protein_coding transcript_biotype:protein_coding gene_symbol:CHD8 description:chromodomain helicase DNA binding protein 8 [Source:HGNC Symbol;Acc:HGNC:20153]	FALSE	TRUE	1.78225	2	2	2	High	High	High	High	Phospho [S553(97); S562(99.3); S1420(100); S1424(100)]	8.65
High	ENSP00000461922.1	pep chromosome:GRCh38:17:74776520:74839753:1 gene:ENSG00000109066.13 transcript:ENST00000582330.1 gene_biotype:protein_coding transcript_biotype:protein_coding gene_symbol:TMEM104 description:transmembrane protein 104 [Source:HGNC Symbol;Acc:HGNC:25984]	FALSE	TRUE	4.6371	1	3	1	High	High	High	High	Phospho [S90(97.2); S94(79.3)]	7.57
High	ENSP00000453743.1	pep chromosome:GRCh38:14:103334949:103343228:1 gene:ENSG00000100664.11 transcript:ENST00000558506.1 gene_biotype:protein_coding transcript_biotype:protein_coding gene_symbol:EIF5 description:eukaryotic translation initiation factor 5 [Source:HGNC Symbol;Acc:HGNC:3299]	FALSE	TRUE	5.56845	1	4	1	High	High	High	High	Phospho [S389(100); S390(100)]	15.34
High	ENSP00000477639.1	pep chromosome:GRCh38:2:71068278:71078868:1 gene:ENSG00000124357.13 transcript:ENST00000613852.4 gene_biotype:protein_coding transcript_biotype:protein_coding gene_symbol:NAGK description:N-acetylglucosamine kinase [Source:HGNC Symbol;Acc:HGNC:17174]	FALSE	TRUE	4.10256	1	2	1	High	High	High	High	Phospho [S122(100)]	8.65
High	ENSP00000340465.3	pep chromosome:GRCh38:8:42416475:42541926:-1 gene:ENSG00000168575.10 transcript:ENST00000342228.7 gene_biotype:protein_coding transcript_biotype:protein_coding gene_symbol:SLC20A2 description:solute carrier family 20 member 2 [Source:HGNC Symbol;Acc:HGNC:10947]	FALSE	TRUE	2.14724	2	4	2	High	High	High	High	Phospho [S256(100)]	10.41
High	ENSP00000247225.6	pep chromosome:GRCh38:14:63684216:63728065:-1 gene:ENSG00000126821.8 transcript:ENST00000247225.7 gene_biotype:protein_coding transcript_biotype:protein_coding gene_symbol:SGPP1 description:sphingosine-1-phosphate phosphatase 1 [Source:HGNC Symbol;Acc:HGNC:17720]	FALSE	TRUE	2.94785	2	3	2	High	High	High	High	Phospho [S112(100)]	9.14
High	ENSP00000352438.5	pep chromosome:GRCh38:12:53452129:53479832:1 gene:ENSG00000197111.15 transcript:ENST00000359462.9 gene_biotype:protein_coding transcript_biotype:protein_coding gene_symbol:PCBP2 description:poly(rC) binding protein 2 [Source:HGNC Symbol;Acc:HGNC:8648]	FALSE	TRUE	6.01093	2	3	1	High	High	High	High	Phospho [S365(94.6)]	6.25
High	ENSP00000220597.3	pep chromosome:GRCh38:8:80967810:81112068:-1 gene:ENSG00000076641.4 transcript:ENST00000220597.4 gene_biotype:protein_coding transcript_biotype:protein_coding gene_symbol:PAG1 description:phosphoprotein membrane anchor with glycosphingolipid microdomains 1 [Source:HGNC Symbol;Acc:HGNC:30043]	FALSE	TRUE	4.39815	2	6	2	High	High	High	High	Phospho [S288(80.5)]	7.65
High	ENSP00000468002.1	pep chromosome:GRCh38:19:11166558:11197547:-1 gene:ENSG00000197256.10 transcript:ENST00000589359.5 gene_biotype:protein_coding transcript_biotype:protein_coding gene_symbol:KANK2 description:KN motif and ankyrin repeat domains 2 [Source:HGNC Symbol;Acc:HGNC:29300]	FALSE	TRUE	4.30733	3	4	3	High	High	High	High	Phospho [S323(99.9); S375(100)]	11.73
High	ENSP00000296121.4	pep chromosome:GRCh38:3:44748744:44761619:-1 gene:ENSG00000163807.6 transcript:ENST00000296121.6 gene_biotype:protein_coding transcript_biotype:protein_coding gene_symbol:KIAA1143 description:KIAA1143 [Source:HGNC Symbol;Acc:HGNC:29198]	FALSE	TRUE	25.974	2	3	2	High	High	High	High	Phospho [S50(100); S146(100)]	11.11
High	ENSP00000405424.2	pep chromosome:GRCh38:8:106447924:106751173:1 gene:ENSG00000164830.18 transcript:ENST00000442977.6 gene_biotype:protein_coding transcript_biotype:protein_coding gene_symbol:OXR1 description:oxidation resistance 1 [Source:HGNC Symbol;Acc:HGNC:15822]	FALSE	TRUE	1.71625	1	5	1	High	High	High	High	Phospho [T203(90.4); S204(99.2)]	8.14
High	ENSP00000377684.1	pep chromosome:GRCh38:17:40019097:40054092:-1 gene:ENSG00000008838.20 transcript:ENST00000394126.5 gene_biotype:protein_coding transcript_biotype:protein_coding gene_symbol:MED24 description:mediator complex subunit 24 [Source:HGNC Symbol;Acc:HGNC:22963]	FALSE	TRUE	3.25444	2	4	2	High	High	High	High	Phospho [S399(100); S402(100); S888(99.7); S898(99.7)]	10.77
High	ENSP00000304592.2	pep chromosome:GRCh38:17:82078338:82098236:-1 gene:ENSG00000169710.9 transcript:ENST00000306749.4 gene_biotype:protein_coding transcript_biotype:protein_coding gene_symbol:FASN description:fatty acid synthase [Source:HGNC Symbol;Acc:HGNC:3594]	FALSE	TRUE	1.07527	2	3	2	High	High	High	High	Phospho [T2204(100)]	8.8
High	ENSP00000489607.1	pep chromosome:GRCh38:1:225496885:225652699:-1 gene:ENSG00000154380.17 transcript:ENST00000635051.1 gene_biotype:protein_coding transcript_biotype:protein_coding gene_symbol:ENAH description:ENAH actin regulator [Source:HGNC Symbol;Acc:HGNC:18271]	FALSE	TRUE	6.23441	3	9	3	High	High	High	High	Phospho [T329(100); S740(99.9)]	3.91
High	ENSP00000362751.4	pep chromosome:GRCh38:9:122941020:123104866:1 gene:ENSG00000011454.17 transcript:ENST00000373647.9 gene_biotype:protein_coding transcript_biotype:protein_coding gene_symbol:RABGAP1 description:RAB GTPase activating protein 1 [Source:HGNC Symbol;Acc:HGNC:17155]	FALSE	TRUE	2.89991	2	4	2	High	High	High	High	Phospho [S42(100); T996(100)]	12.22
High	ENSP00000349351.6	pep chromosome:GRCh38:9:92711363:92764833:-1 gene:ENSG00000185963.14 transcript:ENST00000356884.11 gene_biotype:protein_coding transcript_biotype:protein_coding gene_symbol:BICD2 description:BICD cargo adaptor 2 [Source:HGNC Symbol;Acc:HGNC:17208]	FALSE	TRUE	5.1462	4	6	4	High	High	High	High	Phospho [T567(88); S568(88); S582(100); S608(93.5); S615(85.5)]	10.69
High	ENSP00000431512.1	pep chromosome:GRCh38:8:144291604:144314720:1 gene:ENSG00000185122.11 transcript:ENST00000528838.6 gene_biotype:protein_coding transcript_biotype:protein_coding gene_symbol:HSF1 description:heat shock transcription factor 1 [Source:HGNC Symbol;Acc:HGNC:5224]	FALSE	TRUE	6.23819	2	5	2	High	High	High	High	Phospho [S303(94.2); S363(100)]	11.74
High	ENSP00000399745.2	pep chromosome:GRCh38:7:136868669:137020255:1 gene:ENSG00000181072.11 transcript:ENST00000445907.6 gene_biotype:protein_coding transcript_biotype:protein_coding gene_symbol:CHRM2 description:cholinergic receptor muscarinic 2 [Source:HGNC Symbol;Acc:HGNC:1951]	FALSE	TRUE	7.29614	2	3	2	High	High	High	High	Phospho [S232(93.5); S288(86.9)]	7.27
High	ENSP00000396441.2	pep chromosome:GRCh38:1:156595213:156601470:-1 gene:ENSG00000160818.16 transcript:ENST00000438976.6 gene_biotype:protein_coding transcript_biotype:protein_coding gene_symbol:GPATCH4 description:G-patch domain containing 4 [Source:HGNC Symbol;Acc:HGNC:25982]	FALSE	TRUE	4.53333	2	2	2	High	High	High	High	Phospho [S135(100); S144(99.7)]	6.97
High	ENSP00000374171.4	pep chromosome:GRCh38:17:63009560:63422356:1 gene:ENSG00000170921.15 transcript:ENST00000389520.8 gene_biotype:protein_coding transcript_biotype:protein_coding gene_symbol:TANC2 description:tetratricopeptide repeat, ankyrin repeat and coiled-coil containing 2 [Source:HGNC Symbol;Acc:HGNC:30212]	FALSE	TRUE	2.1	3	3	3	High	High	High	High	Phospho [S1486(89.8); S1540(99.9); S1544(100); S1837(98.6)]	6.2
High	ENSP00000356574.3	pep chromosome:GRCh38:1:180154869:180204030:1 gene:ENSG00000116260.17 transcript:ENST00000367602.8 gene_biotype:protein_coding transcript_biotype:protein_coding gene_symbol:QSOX1 description:quiescin sulfhydryl oxidase 1 [Source:HGNC Symbol;Acc:HGNC:9756]	FALSE	TRUE	1.47256	1	2	1	High	High	High	High	Phospho [S426(100)]	6.68
High	ENSP00000357055.1	pep chromosome:GRCh38:1:160205421:160215376:1 gene:ENSG00000162734.12 transcript:ENST00000368076.1 gene_biotype:protein_coding transcript_biotype:protein_coding gene_symbol:PEA15 description:proliferation and apoptosis adaptor protein 15 [Source:HGNC Symbol;Acc:HGNC:8822]	FALSE	TRUE	8.60927	2	9	2	High	High	High	High	Phospho [S137(100)]	22.61
High	ENSP00000225603.4	pep chromosome:GRCh38:17:48070059:48101478:-1 gene:ENSG00000108468.15 transcript:ENST00000225603.9 gene_biotype:protein_coding transcript_biotype:protein_coding gene_symbol:CBX1 description:chromobox 1 [Source:HGNC Symbol;Acc:HGNC:1551]	FALSE	TRUE	8.64865	2	3	2	High	High	High	High	Phospho [S89(100)]	5.55
High	ENSP00000353246.5	pep chromosome:GRCh38:8:33485182:33501262:1 gene:ENSG00000198042.11 transcript:ENST00000360128.11 gene_biotype:protein_coding transcript_biotype:protein_coding gene_symbol:MAK16 description:MAK16 homolog [Source:HGNC Symbol;Acc:HGNC:13703]	FALSE	TRUE	10	1	2	1	High	High	High	High	Phospho [S197(87.4)]	8.44
High	ENSP00000265056.7	pep chromosome:GRCh38:3:127598411:127622436:1 gene:ENSG00000073111.14 transcript:ENST00000265056.12 gene_biotype:protein_coding transcript_biotype:protein_coding gene_symbol:MCM2 description:minichromosome maintenance complex component 2 [Source:HGNC Symbol;Acc:HGNC:6944]	FALSE	TRUE	4.31416	4	8	4	High	High	High	High	Phospho [S27(99.9); T35(89.3)]	11.71
High	ENSP00000354394.3	pep chromosome:GRCh38:2:190969034:191014250:-1 gene:ENSG00000115415.18 transcript:ENST00000361099.7 gene_biotype:protein_coding transcript_biotype:protein_coding gene_symbol:STAT1 description:signal transducer and activator of transcription 1 [Source:HGNC Symbol;Acc:HGNC:11362]	FALSE	TRUE	2.66667	1	2	1	High	High	High	High	Phospho [S727(100)]	7.23
High	ENSP00000328088.4	pep chromosome:GRCh38:12:79584879:79690964:-1 gene:ENSG00000177425.11 transcript:ENST00000328827.9 gene_biotype:protein_coding transcript_biotype:protein_coding gene_symbol:PAWR description:pro-apoptotic WT1 regulator [Source:HGNC Symbol;Acc:HGNC:8614]	FALSE	TRUE	12.6471	2	8	2	High	High	High	High	Phospho [S108(99.6); S231(99.1)]	10
High	ENSP00000355890.3	pep chromosome:GRCh38:1:219968600:220046505:-1 gene:ENSG00000136628.18 transcript:ENST00000366923.8 gene_biotype:protein_coding transcript_biotype:protein_coding gene_symbol:EPRS description:glutamyl-prolyl-tRNA synthetase [Source:HGNC Symbol;Acc:HGNC:3418]	FALSE	TRUE	1.25661	1	6	1	High	High	High	High	Phospho [S886(89)]	11.56
High	ENSP00000314029.8	pep chromosome:GRCh38:17:7561919:7571969:1 gene:ENSG00000161956.13 transcript:ENST00000321337.12 gene_biotype:protein_coding transcript_biotype:protein_coding gene_symbol:SENP3 description:SUMO specific peptidase 3 [Source:HGNC Symbol;Acc:HGNC:17862]	FALSE	TRUE	6.44599	2	2	2	High	High	High	High	Phospho [S169(100); S212(100)]	6.41
High	ENSP00000452219.1	pep chromosome:GRCh38:6:11094231:11135811:1 gene:ENSG00000224531.6 transcript:ENST00000376935.4 gene_biotype:protein_coding transcript_biotype:nonsense_mediated_decay gene_symbol:SMIM13 description:small integral membrane protein 13 [Source:HGNC Symbol;Acc:HGNC:27356]	FALSE	TRUE	32.967	1	2	1	High	High	High	High	Phospho [S58(99.9); S60(99.3)]	9.8
High	ENSP00000310263.3	pep chromosome:GRCh38:8:23135588:23164027:-1 gene:ENSG00000173530.6 transcript:ENST00000312584.4 gene_biotype:protein_coding transcript_biotype:protein_coding gene_symbol:TNFRSF10D description:TNF receptor superfamily member 10d [Source:HGNC Symbol;Acc:HGNC:11907]	FALSE	TRUE	3.88601	1	2	1	High	High	High	High	Phospho [S381(100)]	6.61
High	ENSP00000309689.6	pep chromosome:GRCh38:7:100574011:100586129:-1 gene:ENSG00000077454.16 transcript:ENST00000310300.11 gene_biotype:protein_coding transcript_biotype:protein_coding gene_symbol:LRCH4 description:leucine rich repeats and calponin homology domain containing 4 [Source:HGNC Symbol;Acc:HGNC:6691]	FALSE	TRUE	6.88141	2	3	2	High	High	High	High	Phospho [S281(89.7); S521(89.1)]	2.92
High	ENSP00000486548.1	pep chromosome:GRCh38:2:203439437:203535335:-1 gene:ENSG00000173166.18 transcript:ENST00000630330.2 gene_biotype:protein_coding transcript_biotype:protein_coding gene_symbol:RAPH1 description:Ras association (RalGDS/AF-6) and pleckstrin homology domains 1 [Source:HGNC Symbol;Acc:HGNC:14436]	FALSE	TRUE	5.14593	3	4	3	High	High	High	High	Phospho [S946(99.7); S1017(95)]	6.21
High	ENSP00000479913.1	pep chromosome:GRCh38:12:42326149:42446618:1 gene:ENSG00000134283.18 transcript:ENST00000610488.4 gene_biotype:protein_coding transcript_biotype:protein_coding gene_symbol:PPHLN1 description:periphilin 1 [Source:HGNC Symbol;Acc:HGNC:19369]	FALSE	TRUE	3.71179	2	3	2	High	High	High	High	Phospho [T200(88.7); S205(93.5)]	9.05
High	ENSP00000460871.1	pep chromosome:GRCh38:16:11833850:11851542:-1 gene:ENSG00000171490.13 transcript:ENST00000571133.6 gene_biotype:protein_coding transcript_biotype:protein_coding gene_symbol:RSL1D1 description:ribosomal L1 domain containing 1 [Source:HGNC Symbol;Acc:HGNC:24534]	FALSE	TRUE	6.12245	2	8	2	High	High	High	High	Phospho [S361(99.5); S427(99.9)]	14.8
High	ENSP00000322579.3	pep chromosome:GRCh38:17:7235038:7239457:-1 gene:ENSG00000040633.13 transcript:ENST00000320316.8 gene_biotype:protein_coding transcript_biotype:protein_coding gene_symbol:PHF23 description:PHD finger protein 23 [Source:HGNC Symbol;Acc:HGNC:28428]	FALSE	TRUE	4.4665	1	2	1	High	High	High	High	Phospho [S74(100)]	9.34
High	ENSP00000424757.1	pep chromosome:GRCh38:4:169393395:169612629:-1 gene:ENSG00000137601.16 transcript:ENST00000507142.5 gene_biotype:protein_coding transcript_biotype:protein_coding gene_symbol:NEK1 description:NIMA related kinase 1 [Source:HGNC Symbol;Acc:HGNC:7744]	FALSE	TRUE	1.94401	2	4	2	High	High	High	High	Phospho [S865(100)]	9.63
High	ENSP00000369716.4	pep chromosome:GRCh38:17:7884796:7912755:1 gene:ENSG00000170004.17 transcript:ENST00000380358.9 gene_biotype:protein_coding transcript_biotype:protein_coding gene_symbol:CHD3 description:chromodomain helicase DNA binding protein 3 [Source:HGNC Symbol;Acc:HGNC:1918]	FALSE	TRUE	0.825644	1	2	1	High	High	High	High	Phospho [S1660(100); S1664(100)]	7.23
High	ENSP00000433664.1	pep chromosome:GRCh38:11:10797050:10807973:-1 gene:ENSG00000110321.17 transcript:ENST00000526148.5 gene_biotype:protein_coding transcript_biotype:protein_coding gene_symbol:EIF4G2 description:eukaryotic translation initiation factor 4 gamma 2 [Source:HGNC Symbol;Acc:HGNC:3297]	FALSE	TRUE	2.42558	2	12	2	High	High	High	High	Phospho [S395(100)]	20.26
High	ENSP00000357048.3	pep chromosome:GRCh38:1:160289273:160343248:-1 gene:ENSG00000122218.16 transcript:ENST00000368069.7 gene_biotype:protein_coding transcript_biotype:protein_coding gene_symbol:COPA description:coatomer protein complex subunit alpha [Source:HGNC Symbol;Acc:HGNC:2230]	FALSE	TRUE	2.02758	2	3	2	High	High	High	High	Phospho [S173(100); S402(100)]	9.48
High	ENSP00000286760.4	pep chromosome:GRCh38:15:82809628:82836108:1 gene:ENSG00000156232.7 transcript:ENST00000286760.5 gene_biotype:protein_coding transcript_biotype:protein_coding gene_symbol:WHAMM description:WASP homolog associated with actin, golgi membranes and microtubules [Source:HGNC Symbol;Acc:HGNC:30493]	FALSE	TRUE	2.34858	1	2	1	Not Found	High	High	High	Phospho [S795(99.9); S799(100)]	8.33
High	ChAdOx_nCoV19_protein_SARS_CoV_2_S_protein	ChAdOx_nCoV19_protein_SARS_CoV_2_S_protein	FALSE	TRUE	1.61043	2	3	2	High	High	High	High	Phospho [S1292(100)]	8.58
High	ENSP00000261183.3	pep chromosome:GRCh38:12:76351797:76559771:-1 gene:ENSG00000091039.17 transcript:ENST00000261183.8 gene_biotype:protein_coding transcript_biotype:protein_coding gene_symbol:OSBPL8 description:oxysterol binding protein like 8 [Source:HGNC Symbol;Acc:HGNC:16396]	FALSE	TRUE	4.04949	2	4	2	High	High	High	High	Phospho [S353(98.3); S807(100); S808(100)]	12.9
High	ENSP00000428426.2	pep chromosome:GRCh38:8:53966556:54022448:-1 gene:ENSG00000187735.14 transcript:ENST00000521604.7 gene_biotype:protein_coding transcript_biotype:protein_coding gene_symbol:TCEA1 description:transcription elongation factor A1 [Source:HGNC Symbol;Acc:HGNC:11612]	FALSE	TRUE	4.98339	2	7	2	High	High	High	High	Phospho [S100(94.8)]	12.72
High	ENSP00000263791.5	pep chromosome:GRCh38:15:39934115:40035591:1 gene:ENSG00000128829.12 transcript:ENST00000263791.10 gene_biotype:protein_coding transcript_biotype:protein_coding gene_symbol:EIF2AK4 description:eukaryotic translation initiation factor 2 alpha kinase 4 [Source:HGNC Symbol;Acc:HGNC:19687]	FALSE	TRUE	1.15221	1	2	1	High	High	High	High	Phospho [T667(100)]	2.01
High	ENSP00000236925.4	pep chromosome:GRCh38:1:200739779:200860701:1 gene:ENSG00000118200.14 transcript:ENST00000236925.8 gene_biotype:protein_coding transcript_biotype:protein_coding gene_symbol:CAMSAP2 description:calmodulin regulated spectrin associated protein family member 2 [Source:HGNC Symbol;Acc:HGNC:29188]	FALSE	TRUE	4.96978	4	5	4	High	High	High	High	Phospho [S611(96.3); T864(86.1); S1148(100); S1313(97.4)]	9.74
High	ENSP00000314129.7	pep chromosome:GRCh38:X:49028726:49043357:-1 gene:ENSG00000068323.17 transcript:ENST00000315869.8 gene_biotype:protein_coding transcript_biotype:protein_coding gene_symbol:TFE3 description:transcription factor binding to IGHM enhancer 3 [Source:HGNC Symbol;Acc:HGNC:11752]	FALSE	TRUE	4.34783	2	4	2	High	High	High	High	Phospho [S556(100)]	6.55
High	ENSP00000310933.4	pep chromosome:GRCh38:11:47269674:47330031:1 gene:ENSG00000110514.19 transcript:ENST00000311027.9 gene_biotype:protein_coding transcript_biotype:protein_coding gene_symbol:MADD description:MAP kinase activating death domain [Source:HGNC Symbol;Acc:HGNC:6766]	FALSE	TRUE	1.94293	2	5	2	High	High	High	High	Phospho [S820(100)]	8.71
High	ENSP00000378837.4	pep chromosome:GRCh38:5:122845605:123008161:1 gene:ENSG00000064652.11 transcript:ENST00000395451.8 gene_biotype:protein_coding transcript_biotype:protein_coding gene_symbol:SNX24 description:sorting nexin 24 [Source:HGNC Symbol;Acc:HGNC:21533]	FALSE	TRUE	8.41584	1	5	1	High	High	High	High	Phospho [S149(99.3)]	9.19
High	ENSP00000497597.1	pep chromosome:GRCh38:10:1056847:1132384:1 gene:ENSG00000047056.16 transcript:ENST00000650072.1 gene_biotype:protein_coding transcript_biotype:protein_coding gene_symbol:WDR37 description:WD repeat domain 37 [Source:HGNC Symbol;Acc:HGNC:31406]	FALSE	TRUE	1.5625	2	4	2	High	High	High	High	Phospho [S30(95.1)]	5.8
High	ENSP00000344392.5	pep chromosome:GRCh38:16:3501012:3536559:1 gene:ENSG00000103351.13 transcript:ENST00000341633.9 gene_biotype:protein_coding transcript_biotype:protein_coding gene_symbol:CLUAP1 description:clusterin associated protein 1 [Source:HGNC Symbol;Acc:HGNC:19009]	FALSE	TRUE	8.10185	2	2	2	High	High	High	High	Phospho [S310(85.6); S324(92.2); S428(100)]	7.95
High	ENSP00000453473.1	pep chromosome:GRCh38:15:34233712:34338057:-1 gene:ENSG00000140199.12 transcript:ENST00000558667.5 gene_biotype:protein_coding transcript_biotype:protein_coding gene_symbol:SLC12A6 description:solute carrier family 12 member 6 [Source:HGNC Symbol;Acc:HGNC:10914]	FALSE	TRUE	1.56522	1	5	1	High	High	High	High	Phospho [S1032(99.6)]	8.2
High	ENSP00000367284.4	pep chromosome:GRCh38:X:44523639:44542859:-1 gene:ENSG00000069509.6 transcript:ENST00000378045.5 gene_biotype:protein_coding transcript_biotype:protein_coding gene_symbol:FUNDC1 description:FUN14 domain containing 1 [Source:HGNC Symbol;Acc:HGNC:28746]	FALSE	TRUE	15.4839	1	4	1	High	High	High	High	Phospho [S13(92)]	9.32
High	ENSP00000385861.1	pep chromosome:GRCh38:22:26491927:26512496:-1 gene:ENSG00000100109.17 transcript:ENST00000407148.5 gene_biotype:protein_coding transcript_biotype:protein_coding gene_symbol:TFIP11 description:tuftelin interacting protein 11 [Source:HGNC Symbol;Acc:HGNC:17165]	FALSE	TRUE	5.01792	2	2	2	High	High	High	High	Phospho [S98(100); S210(100)]	7.16
High	ENSP00000348596.5	pep chromosome:GRCh38:4:75949915:75990945:-1 gene:ENSG00000198301.12 transcript:ENST00000356260.10 gene_biotype:protein_coding transcript_biotype:protein_coding gene_symbol:SDAD1 description:SDA1 domain containing 1 [Source:HGNC Symbol;Acc:HGNC:25537]	FALSE	TRUE	4.65793	3	3	3	High	High	High	High	Phospho [S232(100); S234(100); S236(100); S585(100)]	6.15
High	ENSP00000258991.3	pep chromosome:GRCh38:17:64147227:64263227:-1 gene:ENSG00000136478.7 transcript:ENST00000258991.7 gene_biotype:protein_coding transcript_biotype:protein_coding gene_symbol:TEX2 description:testis expressed 2 [Source:HGNC Symbol;Acc:HGNC:30884]	FALSE	TRUE	1.23457	1	2	1	High	High	High	High	Phospho [S265(93.5); S270(88.6)]	5.61
High	ENSP00000419960.1	pep chromosome:GRCh38:3:100709378:100748927:1 gene:ENSG00000114354.14 transcript:ENST00000490574.5 gene_biotype:protein_coding transcript_biotype:protein_coding gene_symbol:TFG description:trafficking from ER to golgi regulator [Source:HGNC Symbol;Acc:HGNC:11758]	FALSE	TRUE	8	2	4	2	High	High	High	High	Phospho [S153(92.1); S197(100)]	7.43
High	ENSP00000480421.1	pep chromosome:GRCh38:7:100875103:100888664:1 gene:ENSG00000087087.20 transcript:ENST00000611405.5 gene_biotype:protein_coding transcript_biotype:protein_coding gene_symbol:SRRT description:serrate, RNA effector molecule [Source:HGNC Symbol;Acc:HGNC:24101]	FALSE	TRUE	6.73516	5	6	5	High	High	High	High	Phospho [S26(93); S67(100); S74(100); S319(99.5); T544(98.6)]	12.96
High	ENSP00000266529.3	pep chromosome:GRCh38:12:42312086:42326094:-1 gene:ENSG00000139168.8 transcript:ENST00000266529.8 gene_biotype:protein_coding transcript_biotype:protein_coding gene_symbol:ZCRB1 description:zinc finger CCHC-type and RNA binding motif containing 1 [Source:HGNC Symbol;Acc:HGNC:29620]	FALSE	TRUE	5.52995	1	2	1	High	High	High	High	Phospho [S210(100); S216(100)]	6.42
High	ENSP00000330188.6	pep chromosome:GRCh38:12:122503454:122526936:-1 gene:ENSG00000111011.18 transcript:ENST00000331738.12 gene_biotype:protein_coding transcript_biotype:protein_coding gene_symbol:RSRC2 description:arginine and serine rich coiled-coil 2 [Source:HGNC Symbol;Acc:HGNC:30559]	FALSE	TRUE	5.52995	3	6	3	High	High	High	High	Phospho [T16(92.5); S32(99.7)]	7.17
High	ENSP00000402935.2	pep chromosome:GRCh38:3:17160557:17700020:-1 gene:ENSG00000131374.14 transcript:ENST00000446818.6 gene_biotype:protein_coding transcript_biotype:protein_coding gene_symbol:TBC1D5 description:TBC1 domain family member 5 [Source:HGNC Symbol;Acc:HGNC:19166]	FALSE	TRUE	5.14076	3	8	3	High	High	High	High	Phospho [S44(82.9); S576(92.4)]	12.24
High	ENSP00000328023.5	pep chromosome:GRCh38:11:126262938:126268895:-1 gene:ENSG00000182934.12 transcript:ENST00000332118.11 gene_biotype:protein_coding transcript_biotype:protein_coding gene_symbol:SRPRA description:SRP receptor subunit alpha [Source:HGNC Symbol;Acc:HGNC:11307]	FALSE	TRUE	5.01567	1	3	1	High	High	High	High	Phospho [S296(100); S297(100); S298(100)]	11.84
High	ENSP00000334431.6	pep chromosome:GRCh38:4:55853739:55905034:1 gene:ENSG00000090989.18 transcript:ENST00000349598.6 gene_biotype:protein_coding transcript_biotype:protein_coding gene_symbol:EXOC1 description:exocyst complex component 1 [Source:HGNC Symbol;Acc:HGNC:30380]	FALSE	TRUE	2.16155	2	4	2	High	High	High	High	Phospho [S448(89.7); T456(90.2); S458(95)]	5.62
High	ENSP00000481105.1	pep chromosome:GRCh38:9:137007234:137028922:-1 gene:ENSG00000107331.17 transcript:ENST00000614293.4 gene_biotype:protein_coding transcript_biotype:protein_coding gene_symbol:ABCA2 description:ATP binding cassette subfamily A member 2 [Source:HGNC Symbol;Acc:HGNC:32]	FALSE	TRUE	1.62206	2	2	2	High	High	High	High	Phospho [S1358(97.2); S1362(97.2); T2443(100); S2450(100)]	9.97
High	ENSP00000497444.1	pep chromosome:GRCh38:4:3503612:3532422:-1 gene:ENSG00000163956.13 transcript:ENST00000650182.1 gene_biotype:protein_coding transcript_biotype:protein_coding gene_symbol:LRPAP1 description:LDL receptor related protein associated protein 1 [Source:HGNC Symbol;Acc:HGNC:6701]	FALSE	TRUE	6.72269	2	5	2	High	High	High	High	Phospho [S50(100); S247(99)]	8.33
High	ENSP00000310406.4	pep chromosome:GRCh38:11:66330241:66336434:-1 gene:ENSG00000174791.11 transcript:ENST00000311320.9 gene_biotype:protein_coding transcript_biotype:protein_coding gene_symbol:RIN1 description:Ras and Rab interactor 1 [Source:HGNC Symbol;Acc:HGNC:18749]	FALSE	TRUE	1.40485	1	4	1	High	High	High	High	Phospho [S333(100)]	7.94
High	ENSP00000484608.2	pep chromosome:GRCh38:CHR_HSCHR16_1_CTG1:15060152:15122225:-1 gene:ENSG00000275498.5 transcript:ENST00000617553.4 gene_biotype:protein_coding transcript_biotype:protein_coding gene_symbol:PDXDC1 description:pyridoxal dependent decarboxylase domain containing 1 [Source:HGNC Symbol;Acc:HGNC:28995]	FALSE	TRUE	2.35732	1	6	1	High	High	High	High	Phospho [T738(91.5); S739(91.5); S740(98)]	18.36
High	ENSP00000317872.4	pep chromosome:GRCh38:16:24539566:24572863:1 gene:ENSG00000122257.20 transcript:ENST00000319715.10 gene_biotype:protein_coding transcript_biotype:protein_coding gene_symbol:RBBP6 description:RB binding protein 6, ubiquitin ligase [Source:HGNC Symbol;Acc:HGNC:9889]	FALSE	TRUE	2.67857	4	4	4	High	High	High	High	Phospho [Y727(84.5); S730(91.6); T984(100); S1179(100); S1625(92.1)]	5.91
High	ENSP00000345848.4	pep chromosome:GRCh38:9:97983341:98015943:1 gene:ENSG00000136938.9 transcript:ENST00000339399.5 gene_biotype:protein_coding transcript_biotype:protein_coding gene_symbol:ANP32B description:acidic nuclear phosphoprotein 32 family member B [Source:HGNC Symbol;Acc:HGNC:16677]	FALSE	TRUE	4.38247	2	7	2	High	High	High	High	Phospho [T244(100)]	9.25
High	ENSP00000368884.3	pep chromosome:GRCh38:X:20149911:20266909:-1 gene:ENSG00000177189.14 transcript:ENST00000379565.9 gene_biotype:protein_coding transcript_biotype:protein_coding gene_symbol:RPS6KA3 description:ribosomal protein S6 kinase A3 [Source:HGNC Symbol;Acc:HGNC:10432]	FALSE	TRUE	4.05405	3	5	3	High	High	High	High	Phospho [S715(100)]	10.68
High	ENSP00000346890.7	pep chromosome:GRCh38:1:51789191:51878805:-1 gene:ENSG00000078618.21 transcript:ENST00000354831.11 gene_biotype:protein_coding transcript_biotype:protein_coding gene_symbol:NRDC description:nardilysin convertase [Source:HGNC Symbol;Acc:HGNC:7995]	FALSE	TRUE	2.05086	2	4	2	High	High	High	High	Phospho [S86(100); S94(100)]	12.44
High	ENSP00000403524.3	pep chromosome:GRCh38:12:111642146:111685956:-1 gene:ENSG00000089234.16 transcript:ENST00000419234.9 gene_biotype:protein_coding transcript_biotype:protein_coding gene_symbol:BRAP description:BRCA1 associated protein [Source:HGNC Symbol;Acc:HGNC:1099]	FALSE	TRUE	3.71622	2	2	2	High	High	High	High	Phospho [S97(95.9); S117(100)]	2.83
High	ENSP00000364574.5	pep chromosome:GRCh38:6:31952229:31958852:-1 gene:ENSG00000204356.14 transcript:ENST00000375425.9 gene_biotype:protein_coding transcript_biotype:protein_coding gene_symbol:NELFE description:negative elongation factor complex member E [Source:HGNC Symbol;Acc:HGNC:13974]	FALSE	TRUE	6.20155	2	3	2	High	High	High	High	Phospho [S122(99.6); S188(99.1)]	9.7
High	ENSP00000341826.6	pep chromosome:GRCh38:12:54280755:54285214:1 gene:ENSG00000135486.17 transcript:ENST00000340913.10 gene_biotype:protein_coding transcript_biotype:protein_coding gene_symbol:HNRNPA1 description:heterogeneous nuclear ribonucleoprotein A1 [Source:HGNC Symbol;Acc:HGNC:5031]	FALSE	TRUE	7.7957	2	7	2	High	High	High	High	Phospho [S6(100)]	14.66
High	ENSP00000253329.2	pep chromosome:GRCh38:6:149504495:149546043:-1 gene:ENSG00000131013.4 transcript:ENST00000253329.3 gene_biotype:protein_coding transcript_biotype:protein_coding gene_symbol:PPIL4 description:peptidylprolyl isomerase like 4 [Source:HGNC Symbol;Acc:HGNC:15702]	FALSE	TRUE	7.11382	2	5	2	High	High	High	High	Phospho [S178(92.7); S477(100); S479(100)]	9.43
High	ENSP00000491480.1	pep chromosome:GRCh38:CHR_HSCHR17_3_CTG1:18244815:18258738:-1 gene:ENSG00000284571.2 transcript:ENST00000638207.2 gene_biotype:protein_coding transcript_biotype:protein_coding gene_symbol:FLII description:FLII actin remodeling protein [Source:HGNC Symbol;Acc:HGNC:3750]	FALSE	TRUE	0.866824	3	4	3	High	High	High	High	Phospho [S436(100)]	2.24
High	ENSP00000278572.6	pep chromosome:GRCh38:11:75399530:75405688:1 gene:ENSG00000149273.15 transcript:ENST00000278572.10 gene_biotype:protein_coding transcript_biotype:protein_coding gene_symbol:RPS3 description:ribosomal protein S3 [Source:HGNC Symbol;Acc:HGNC:10420]	FALSE	TRUE	5.01931	1	4	1	High	High	High	High	Phospho [T237(95.4)]	10.08
High	ENSP00000303507.8	pep chromosome:GRCh38:22:23180509:23318037:1 gene:ENSG00000186716.21 transcript:ENST00000305877.13 gene_biotype:protein_coding transcript_biotype:protein_coding gene_symbol:BCR description:BCR activator of RhoGEF and GTPase [Source:HGNC Symbol;Acc:HGNC:1014]	FALSE	TRUE	3.85523	3	8	2	High	High	High	High	Phospho [S122(100); S303(99.8); S315(99.8)]	11.21
High	ENSP00000203556.3	pep chromosome:GRCh38:19:19629476:19643657:-1 gene:ENSG00000089639.11 transcript:ENST00000203556.9 gene_biotype:protein_coding transcript_biotype:protein_coding gene_symbol:GMIP description:GEM interacting protein [Source:HGNC Symbol;Acc:HGNC:24852]	FALSE	TRUE	1.4433	1	2	1	High	High	High	High	Phospho [S441(96.1)]	6.64
High	ENSP00000467512.1	pep chromosome:GRCh38:19:12995838:13094649:1 gene:ENSG00000008441.16 transcript:ENST00000592199.5 gene_biotype:protein_coding transcript_biotype:protein_coding gene_symbol:NFIX description:nuclear factor I X [Source:HGNC Symbol;Acc:HGNC:7788]	FALSE	TRUE	6.57371	2	4	2	High	High	High	High	Phospho [S265(99.8); S280(92.2)]	10.24
High	ENSP00000482277.1	pep chromosome:GRCh38:19:10316212:10333529:-1 gene:ENSG00000161847.14 transcript:ENST00000617231.5 gene_biotype:protein_coding transcript_biotype:protein_coding gene_symbol:RAVER1 description:ribonucleoprotein, PTB binding 1 [Source:HGNC Symbol;Acc:HGNC:30296]	FALSE	TRUE	6.90122	3	3	3	High	High	High	High	Phospho [S14(99.6); T463(100); S617(100)]; Met-loss+Acetyl [N-Term]	2.84
High	ENSP00000232888.6	pep chromosome:GRCh38:3:51933429:51941904:-1 gene:ENSG00000114767.7 transcript:ENST00000232888.7 gene_biotype:protein_coding transcript_biotype:protein_coding gene_symbol:RRP9 description:ribosomal RNA processing 9, U3 small nucleolar RNA binding protein [Source:HGNC Symbol;Acc:HGNC:16829]	FALSE	TRUE	3.57895	1	3	1	High	High	High	High	Phospho [S50(100); S51(99.9); S53(99.1)]	13.7
High	ENSP00000387006.3	pep chromosome:GRCh38:2:179944876:180007297:-1 gene:ENSG00000163510.14 transcript:ENST00000410053.8 gene_biotype:protein_coding transcript_biotype:protein_coding gene_symbol:CWC22 description:CWC22 spliceosome associated protein homolog [Source:HGNC Symbol;Acc:HGNC:29322]	FALSE	TRUE	2.7533	2	3	2	High	High	High	High	Phospho [S27(98.1); S28(98.1); S39(80.7); S829(93.7)]	4.64
High	ENSP00000347046.3	pep chromosome:GRCh38:4:119494403:119628804:-1 gene:ENSG00000138735.16 transcript:ENST00000354960.8 gene_biotype:protein_coding transcript_biotype:protein_coding gene_symbol:PDE5A description:phosphodiesterase 5A [Source:HGNC Symbol;Acc:HGNC:8784]	FALSE	TRUE	4	2	3	2	High	High	High	High	Phospho [S86(100); T137(100)]	9.83
High	ENSP00000435439.1	pep chromosome:GRCh38:11:65998567:66002176:-1 gene:ENSG00000175376.9 transcript:ENST00000527249.5 gene_biotype:protein_coding transcript_biotype:protein_coding gene_symbol:EIF1AD description:eukaryotic translation initiation factor 1A domain containing [Source:HGNC Symbol;Acc:HGNC:28147]	FALSE	TRUE	9.09091	1	4	1	High	High	High	High	Phospho [S159(100)]	11.99
High	ENSP00000384899.2	pep chromosome:GRCh38:19:19427527:19508927:1 gene:ENSG00000167491.17 transcript:ENST00000404158.5 gene_biotype:protein_coding transcript_biotype:protein_coding gene_symbol:GATAD2A description:GATA zinc finger domain containing 2A [Source:HGNC Symbol;Acc:HGNC:29989]	FALSE	TRUE	3.15457	1	2	1	High	High	High	High	Phospho [S100(100); S107(100); S114(92.7)]	9.19
High	ENSP00000352222.4	pep chromosome:GRCh38:X:16587999:16712669:-1 gene:ENSG00000047230.15 transcript:ENST00000359276.9 gene_biotype:protein_coding transcript_biotype:protein_coding gene_symbol:CTPS2 description:CTP synthase 2 [Source:HGNC Symbol;Acc:HGNC:2520]	FALSE	TRUE	3.24232	1	2	1	High	High	High	High	Phospho [S568(92.4); S571(99.3)]	2.68
High	ENSP00000361522.5	pep chromosome:GRCh38:6:43477523:43506556:1 gene:ENSG00000137221.14 transcript:ENST00000372445.9 gene_biotype:protein_coding transcript_biotype:protein_coding gene_symbol:TJAP1 description:tight junction associated protein 1 [Source:HGNC Symbol;Acc:HGNC:17949]	FALSE	TRUE	5.20646	2	4	2	High	High	High	High	Phospho [S300(100); S545(99.4)]	10.27
High	ENSP00000387739.2	pep chromosome:GRCh38:11:94768356:94876748:1 gene:ENSG00000166025.18 transcript:ENST00000433060.3 gene_biotype:protein_coding transcript_biotype:protein_coding gene_symbol:AMOTL1 description:angiomotin like 1 [Source:HGNC Symbol;Acc:HGNC:17811]	FALSE	TRUE	3.24268	3	4	3	High	High	High	High	Phospho [S720(100); S809(88.4); S828(100)]	6.36
High	ENSP00000423325.1	pep chromosome:GRCh38:4:53377839:54295272:1 gene:ENSG00000282278.1 transcript:ENST00000507166.5 gene_biotype:protein_coding transcript_biotype:protein_coding gene_symbol:AC058822.1 description:novel FIP1L1-PDGFRA fusion protein	FALSE	TRUE	5.7715	2	4	1	High	High	High	High	Phospho [S85(100); S87(100); S89(100); T804(88.6); S808(90.7)]	13.16
High	ENSP00000255006.6	pep chromosome:GRCh38:20:19886521:20002459:1 gene:ENSG00000132669.13 transcript:ENST00000255006.11 gene_biotype:protein_coding transcript_biotype:protein_coding gene_symbol:RIN2 description:Ras and Rab interactor 2 [Source:HGNC Symbol;Acc:HGNC:18750]	FALSE	TRUE	3.2839	3	4	3	High	High	High	High	Phospho [S415(100); S535(94.2)]	6.46
High	P02672	Fibrinogen alpha chain OS=Bos taurus GN=FGA PE=1 SV=5	TRUE	FALSE	2.27642	1	4	1	High	High	High	High	Phospho [S578(100)]	13.74
High	ENSP00000370156.1	pep chromosome:GRCh38:X:10445556:10576955:-1 gene:ENSG00000101871.14 transcript:ENST00000380779.5 gene_biotype:protein_coding transcript_biotype:protein_coding gene_symbol:MID1 description:midline 1 [Source:HGNC Symbol;Acc:HGNC:7095]	FALSE	TRUE	1.94903	1	2	1	High	High	High	High	Phospho [S92(100); S96(99.6)]	6.71
High	ENSP00000484525.1	pep chromosome:GRCh38:18:79679801:79756623:1 gene:ENSG00000060069.16 transcript:ENST00000613122.4 gene_biotype:protein_coding transcript_biotype:protein_coding gene_symbol:CTDP1 description:CTD phosphatase subunit 1 [Source:HGNC Symbol;Acc:HGNC:2498]	FALSE	TRUE	2.39334	2	3	2	High	High	High	High	Phospho [S474(99.8); S740(100)]	5.7
High	ENSP00000359225.4	pep chromosome:GRCh38:1:94896957:94927110:-1 gene:ENSG00000117519.16 transcript:ENST00000370206.9 gene_biotype:protein_coding transcript_biotype:protein_coding gene_symbol:CNN3 description:calponin 3 [Source:HGNC Symbol;Acc:HGNC:2157]	FALSE	TRUE	5.16717	2	6	1	High	High	High	High	Phospho [S323(95.2)]	12.96
High	ENSP00000338173.5	pep chromosome:GRCh38:2:20248691:20327383:-1 gene:ENSG00000055917.15 transcript:ENST00000338086.9 gene_biotype:protein_coding transcript_biotype:protein_coding gene_symbol:PUM2 description:pumilio RNA binding family member 2 [Source:HGNC Symbol;Acc:HGNC:14958]	FALSE	TRUE	2.06767	2	3	2	High	High	High	High	Phospho [S136(100); S182(99.8)]	5.5
High	ENSP00000380557.3	pep chromosome:GRCh38:19:15380050:15418988:-1 gene:ENSG00000011243.18 transcript:ENST00000397410.10 gene_biotype:protein_coding transcript_biotype:protein_coding gene_symbol:AKAP8L description:A-kinase anchoring protein 8 like [Source:HGNC Symbol;Acc:HGNC:29857]	FALSE	TRUE	6.50155	2	4	2	High	High	High	High	Phospho [S283(100); T294(98.2); S300(98.2); S302(98.2)]	9.54
High	ENSP00000482106.1	pep chromosome:GRCh38:CHR_HSCHR14_7_CTG1:94050922:94081245:-1 gene:ENSG00000273761.5 transcript:ENST00000613280.4 gene_biotype:protein_coding transcript_biotype:protein_coding gene_symbol:DDX24 description:DEAD-box helicase 24 [Source:HGNC Symbol;Acc:HGNC:13266]	FALSE	TRUE	5.35506	2	4	2	High	High	High	High	Phospho [S82(100); S287(98.7)]	11.19
High	ENSP00000418563.1	pep chromosome:GRCh38:3:143001570:143060725:1 gene:ENSG00000163714.18 transcript:ENST00000473835.7 gene_biotype:protein_coding transcript_biotype:protein_coding gene_symbol:U2SURP description:U2 snRNP associated SURP domain containing [Source:HGNC Symbol;Acc:HGNC:30855]	FALSE	TRUE	2.62391	3	6	2	High	High	High	High	Phospho [T919(100); S934(85.7); S998(100); S1000(100); S1002(100)]	7.82
High	ENSP00000327054.3	pep chromosome:GRCh38:19:2428166:2456959:-1 gene:ENSG00000176619.13 transcript:ENST00000325327.4 gene_biotype:protein_coding transcript_biotype:protein_coding gene_symbol:LMNB2 description:lamin B2 [Source:HGNC Symbol;Acc:HGNC:6638]	FALSE	TRUE	4.83871	3	6	2	High	High	High	High	Phospho [S407(93.6); S419(84.7)]	5.14
High	ENSP00000296328.4	pep chromosome:GRCh38:3:196347662:196432427:-1 gene:ENSG00000163960.12 transcript:ENST00000296328.9 gene_biotype:protein_coding transcript_biotype:protein_coding gene_symbol:UBXN7 description:UBX domain protein 7 [Source:HGNC Symbol;Acc:HGNC:29119]	FALSE	TRUE	3.68098	1	3	1	High	High	High	High	Phospho [S288(100)]	8.32
High	ENSP00000349860.4	pep chromosome:GRCh38:2:69319769:69387254:-1 gene:ENSG00000198380.12 transcript:ENST00000357308.8 gene_biotype:protein_coding transcript_biotype:protein_coding gene_symbol:GFPT1 description:glutamine--fructose-6-phosphate transaminase 1 [Source:HGNC Symbol;Acc:HGNC:4241]	FALSE	TRUE	1.8598	1	9	1	High	High	High	High	Phospho [T263(91.9)]	13.26
High	ENSP00000444596.2	pep chromosome:GRCh38:13:77044657:77327094:-1 gene:ENSG00000005810.18 transcript:ENST00000544440.7 gene_biotype:protein_coding transcript_biotype:protein_coding gene_symbol:MYCBP2 description:MYC binding protein 2 [Source:HGNC Symbol;Acc:HGNC:23386]	FALSE	TRUE	0.6413	3	6	3	High	High	High	High	Phospho [S1624(92.1); S2839(99.5)]	5.78
High	ENSP00000339090.4	pep chromosome:GRCh38:X:130401987:130413656:1 gene:ENSG00000134597.16 transcript:ENST00000305536.11 gene_biotype:protein_coding transcript_biotype:protein_coding gene_symbol:RBMX2 description:RNA binding motif protein X-linked 2 [Source:HGNC Symbol;Acc:HGNC:24282]	FALSE	TRUE	6.52174	2	7	2	High	High	High	High	Phospho [S187(94.8); S314(99.4)]	7.69
High	ENSP00000386864.1	pep chromosome:GRCh38:2:85616169:85649280:1 gene:ENSG00000168883.20 transcript:ENST00000409470.5 gene_biotype:protein_coding transcript_biotype:protein_coding gene_symbol:USP39 description:ubiquitin specific peptidase 39 [Source:HGNC Symbol;Acc:HGNC:20071]	FALSE	TRUE	2.65487	3	3	3	High	High	High	High	Phospho [S82(100)]	4.12
High	ENSP00000256897.4	pep chromosome:GRCh38:5:87394274:87412930:-1 gene:ENSG00000134480.15 transcript:ENST00000256897.9 gene_biotype:protein_coding transcript_biotype:protein_coding gene_symbol:CCNH description:cyclin H [Source:HGNC Symbol;Acc:HGNC:1594]	FALSE	TRUE	5.26316	2	2	2	High	High	High	High	Phospho [T315(100)]	7.2
High	ENSP00000181839.4	pep chromosome:GRCh38:7:39950256:40099580:1 gene:ENSG00000065883.16 transcript:ENST00000181839.10 gene_biotype:protein_coding transcript_biotype:protein_coding gene_symbol:CDK13 description:cyclin dependent kinase 13 [Source:HGNC Symbol;Acc:HGNC:1733]	FALSE	TRUE	2.18254	3	3	2	High	High	High	High	Phospho [S360(99.5); S525(100); T1246(100)]	7.85
High	ENSP00000497393.1	pep chromosome:GRCh38:6:34889265:35088963:1 gene:ENSG00000064999.15 transcript:ENST00000649117.1 gene_biotype:protein_coding transcript_biotype:protein_coding gene_symbol:ANKS1A description:ankyrin repeat and sterile alpha motif domain containing 1A [Source:HGNC Symbol;Acc:HGNC:20961]	FALSE	TRUE	1.67504	2	2	2	High	High	High	High	Phospho [S403(94.2); S668(100)]	5.8
High	ENSP00000410378.2	pep chromosome:GRCh38:12:132768914:132828864:-1 gene:ENSG00000090615.15 transcript:ENST00000450791.7 gene_biotype:protein_coding transcript_biotype:protein_coding gene_symbol:GOLGA3 description:golgin A3 [Source:HGNC Symbol;Acc:HGNC:4426]	FALSE	TRUE	2.00267	1	2	1	High	High	High	High	Phospho [S315(93)]	6.75
High	ENSP00000265560.4	pep chromosome:GRCh38:3:49277144:49340053:-1 gene:ENSG00000114316.13 transcript:ENST00000265560.9 gene_biotype:protein_coding transcript_biotype:protein_coding gene_symbol:USP4 description:ubiquitin specific peptidase 4 [Source:HGNC Symbol;Acc:HGNC:12627]	FALSE	TRUE	2.49221	1	2	1	High	High	High	High	Phospho [S675(99.9); S680(99)]	7.5
High	ENSP00000338019.5	pep chromosome:GRCh38:2:219279267:219286900:1 gene:ENSG00000135924.15 transcript:ENST00000336576.9 gene_biotype:protein_coding transcript_biotype:protein_coding gene_symbol:DNAJB2 description:DnaJ heat shock protein family (Hsp40) member B2 [Source:HGNC Symbol;Acc:HGNC:5228]	FALSE	TRUE	2.46914	2	5	2	High	High	High	High	Phospho [S313(100)]	6.8
High	ENSP00000338799.5	pep chromosome:GRCh38:5:55935099:55976314:-1 gene:ENSG00000134352.20 transcript:ENST00000336909.9 gene_biotype:protein_coding transcript_biotype:protein_coding gene_symbol:IL6ST description:interleukin 6 signal transducer [Source:HGNC Symbol;Acc:HGNC:6021]	FALSE	TRUE	2.72331	2	2	2	High	High	High	High	Phospho [S667(99.8); S839(99.6)]	5.96
High	ENSP00000476386.1	pep chromosome:GRCh38:3:53283429:53347543:-1 gene:ENSG00000272886.6 transcript:ENST00000610213.6 gene_biotype:protein_coding transcript_biotype:protein_coding gene_symbol:DCP1A description:decapping mRNA 1A [Source:HGNC Symbol;Acc:HGNC:18714]	FALSE	TRUE	2.92096	2	3	2	High	High	High	High	Phospho [S525(100)]	5.45
High	ENSP00000494292.1	pep chromosome:GRCh38:7:100679507:100693968:-1 gene:ENSG00000146830.10 transcript:ENST00000646601.1 gene_biotype:protein_coding transcript_biotype:protein_coding gene_symbol:GIGYF1 description:GRB10 interacting GYF protein 1 [Source:HGNC Symbol;Acc:HGNC:9126]	FALSE	TRUE	2.41546	3	7	3	High	High	High	High	Phospho [S157(99.2); S230(100); S638(91.3)]	8.04
High	ENSP00000456935.1	pep chromosome:GRCh38:16:30352847:30354934:-1 gene:ENSG00000169217.9 transcript:ENST00000569466.1 gene_biotype:protein_coding transcript_biotype:protein_coding gene_symbol:CD2BP2 description:CD2 cytoplasmic tail binding protein 2 [Source:HGNC Symbol;Acc:HGNC:1656]	FALSE	TRUE	5.27859	1	7	1	High	High	High	High	Phospho [S49(99.9)]	22.73
High	ENSP00000263092.5	pep chromosome:GRCh38:17:2416049:2511888:-1 gene:ENSG00000127804.13 transcript:ENST00000263092.11 gene_biotype:protein_coding transcript_biotype:protein_coding gene_symbol:METTL16 description:methyltransferase like 16 [Source:HGNC Symbol;Acc:HGNC:28484]	FALSE	TRUE	7.82918	2	2	2	High	High	High	High	Phospho [S419(99.4); S455(98.2)]	9.5
High	ENSP00000439479.1	pep chromosome:GRCh38:5:119071389:119249127:1 gene:ENSG00000172869.14 transcript:ENST00000539542.5 gene_biotype:protein_coding transcript_biotype:protein_coding gene_symbol:DMXL1 description:Dmx like 1 [Source:HGNC Symbol;Acc:HGNC:2937]	FALSE	TRUE	0.853018	2	3	2	High	High	High	High	Phospho [S1908(99.7); S1970(100)]	6.24
High	ENSP00000025008.5	pep chromosome:GRCh38:8:52622458:52714435:-1 gene:ENSG00000023287.13 transcript:ENST00000025008.10 gene_biotype:protein_coding transcript_biotype:protein_coding gene_symbol:RB1CC1 description:RB1 inducible coiled-coil 1 [Source:HGNC Symbol;Acc:HGNC:15574]	FALSE	TRUE	1.69385	2	4	2	High	High	High	High	Phospho [S222(100)]	9.17
High	ENSP00000389383.1	pep chromosome:GRCh38:2:219597857:219616451:1 gene:ENSG00000144589.22 transcript:ENST00000456909.6 gene_biotype:protein_coding transcript_biotype:protein_coding gene_symbol:STK11IP description:serine/threonine kinase 11 interacting protein [Source:HGNC Symbol;Acc:HGNC:19184]	FALSE	TRUE	3.21691	3	3	3	High	High	High	High	Phospho [S387(91.5); S482(100); S761(100)]	5.18
High	ENSP00000383623.3	pep chromosome:GRCh38:6:167827133:167972023:1 gene:ENSG00000130396.20 transcript:ENST00000400822.7 gene_biotype:protein_coding transcript_biotype:protein_coding gene_symbol:AFDN description:afadin, adherens junction formation factor [Source:HGNC Symbol;Acc:HGNC:7137]	FALSE	TRUE	1.52672	3	4	3	High	High	High	High	Phospho [S1171(100); S1172(100); S1181(100); S1274(100)]	9.71
High	ENSP00000351536.5	pep chromosome:GRCh38:9:136206333:136245841:-1 gene:ENSG00000165661.16 transcript:ENST00000358701.9 gene_biotype:protein_coding transcript_biotype:protein_coding gene_symbol:QSOX2 description:quiescin sulfhydryl oxidase 2 [Source:HGNC Symbol;Acc:HGNC:30249]	FALSE	TRUE	3.15186	1	2	1	High	High	High	High	Phospho [S578(99.6)]	6.06
High	ENSP00000345412.4	pep chromosome:GRCh38:11:61402641:61429911:-1 gene:ENSG00000149532.15 transcript:ENST00000340437.8 gene_biotype:protein_coding transcript_biotype:protein_coding gene_symbol:CPSF7 description:cleavage and polyadenylation specific factor 7 [Source:HGNC Symbol;Acc:HGNC:30098]	FALSE	TRUE	6.42023	2	3	2	High	High	High	High	Phospho [S91(88); T246(99.5)]	7.23
High	ENSP00000355210.3	pep chromosome:GRCh38:22:38219291:38273010:-1 gene:ENSG00000198792.13 transcript:ENST00000361906.8 gene_biotype:protein_coding transcript_biotype:protein_coding gene_symbol:TMEM184B description:transmembrane protein 184B [Source:HGNC Symbol;Acc:HGNC:1310]	FALSE	TRUE	4.4226	2	3	2	High	High	High	High	Phospho [S388(99.9); S403(99.7)]	6.5
High	ENSP00000302961.2	pep chromosome:GRCh38:5:133052013:133106449:1 gene:ENSG00000170606.15 transcript:ENST00000304858.7 gene_biotype:protein_coding transcript_biotype:protein_coding gene_symbol:HSPA4 description:heat shock protein family A (Hsp70) member 4 [Source:HGNC Symbol;Acc:HGNC:5237]	FALSE	TRUE	5.59524	2	2	2	High	High	High	High	Phospho [S647(99.9)]	5.24
High	ENSP00000389832.2	pep chromosome:GRCh38:17:35011614:35089315:-1 gene:ENSG00000092871.16 transcript:ENST00000447669.6 gene_biotype:protein_coding transcript_biotype:protein_coding gene_symbol:RFFL description:ring finger and FYVE like domain containing E3 ubiquitin protein ligase [Source:HGNC Symbol;Acc:HGNC:24821]	FALSE	TRUE	10.7438	2	3	2	High	High	High	High	Phospho [S226(99); S229(99.9); S240(99.4)]	11.85
High	ENSP00000364310.1	pep chromosome:GRCh38:11:119093879:119095449:-1 gene:ENSG00000188486.3 transcript:ENST00000375167.1 gene_biotype:protein_coding transcript_biotype:nonsense_mediated_decay gene_symbol:H2AFX description:H2A histone family member X [Source:HGNC Symbol;Acc:HGNC:4739]	FALSE	TRUE	16.7832	3	4	3	High	High	High	High	Phospho [S140(100)]	8.56
High	ENSP00000263025.4	pep chromosome:GRCh38:16:30114105:30123220:-1 gene:ENSG00000102882.12 transcript:ENST00000263025.9 gene_biotype:protein_coding transcript_biotype:protein_coding gene_symbol:MAPK3 description:mitogen-activated protein kinase 3 [Source:HGNC Symbol;Acc:HGNC:6877]	FALSE	TRUE	5.01319	1	7	1	High	High	High	High	Phospho [Y204(93.7)]	13.73
High	ENSP00000365312.2	pep chromosome:GRCh38:10:26746593:26860935:-1 gene:ENSG00000136754.17 transcript:ENST00000376142.6 gene_biotype:protein_coding transcript_biotype:protein_coding gene_symbol:ABI1 description:abl interactor 1 [Source:HGNC Symbol;Acc:HGNC:11320]	FALSE	TRUE	7.28346	3	7	3	High	High	High	High	Phospho [S183(99.8); S225(91); S240(99.6)]	7.13
High	ENSP00000287169.3	pep chromosome:GRCh38:11:57668114:57701182:1 gene:ENSG00000156599.11 transcript:ENST00000287169.8 gene_biotype:protein_coding transcript_biotype:protein_coding gene_symbol:ZDHHC5 description:zinc finger DHHC-type containing 5 [Source:HGNC Symbol;Acc:HGNC:18472]	FALSE	TRUE	7.97203	4	7	4	High	High	High	High	Phospho [S380(100); S409(85.8); S529(100)]	9.35
High	ENSP00000335029.7	pep chromosome:GRCh38:13:113977783:114132623:-1 gene:ENSG00000185989.11 transcript:ENST00000334062.8 gene_biotype:protein_coding transcript_biotype:protein_coding gene_symbol:RASA3 description:RAS p21 protein activator 3 [Source:HGNC Symbol;Acc:HGNC:20331]	FALSE	TRUE	2.51799	2	6	2	High	High	High	High	Phospho [S809(93.2); S833(100)]	6.76
High	ENSP00000264705.3	pep chromosome:GRCh38:2:27217369:27243943:1 gene:ENSG00000084774.14 transcript:ENST00000264705.9 gene_biotype:protein_coding transcript_biotype:protein_coding gene_symbol:CAD description:carbamoyl-phosphate synthetase 2, aspartate transcarbamylase, and dihydroorotase [Source:HGNC Symbol;Acc:HGNC:1424]	FALSE	TRUE	0.674157	2	3	2	High	High	High	High	Phospho [S1859(100)]	8.79
High	ENSP00000242284.6	pep chromosome:GRCh38:9:36190921:36212059:1 gene:ENSG00000122705.17 transcript:ENST00000345519.10 gene_biotype:protein_coding transcript_biotype:protein_coding gene_symbol:CLTA description:clathrin light chain A [Source:HGNC Symbol;Acc:HGNC:2090]	FALSE	TRUE	13.7615	2	2	2	High	High	High	High	Phospho [S105(100); S176(99.5)]	8.57
High	ENSP00000420150.1	pep chromosome:GRCh38:3:158105855:158544522:1 gene:ENSG00000174891.13 transcript:ENST00000480820.5 gene_biotype:protein_coding transcript_biotype:protein_coding gene_symbol:RSRC1 description:arginine and serine rich coiled-coil 1 [Source:HGNC Symbol;Acc:HGNC:24152]	FALSE	TRUE	2.99401	2	6	2	High	High	High	High	Phospho [T8(99.5)]	6.93
High	ENSP00000387259.2	pep chromosome:GRCh38:2:173075714:173266783:1 gene:ENSG00000091436.17 transcript:ENST00000409176.6 gene_biotype:protein_coding transcript_biotype:protein_coding gene_symbol:MAP3K20 description:mitogen-activated protein kinase kinase kinase 20 [Source:HGNC Symbol;Acc:HGNC:17797]	FALSE	TRUE	3.25	2	4	2	High	High	High	High	Phospho [S637(90.9)]	4.76
High	ENSP00000240079.6	pep chromosome:GRCh38:12:102012840:102061991:-1 gene:ENSG00000120860.11 transcript:ENST00000240079.11 gene_biotype:protein_coding transcript_biotype:protein_coding gene_symbol:WASHC3 description:WASH complex subunit 3 [Source:HGNC Symbol;Acc:HGNC:24256]	FALSE	TRUE	7.21649	1	5	1	High	High	High	High	Phospho [S186(93.5)]	8.8
High	ENSP00000383042.4	pep chromosome:GRCh38:1:23019493:23083688:1 gene:ENSG00000004487.16 transcript:ENST00000400181.8 gene_biotype:protein_coding transcript_biotype:protein_coding gene_symbol:KDM1A description:lysine demethylase 1A [Source:HGNC Symbol;Acc:HGNC:29079]	FALSE	TRUE	2.28311	1	2	1	High	High	High	High	Phospho [S131(95.1); S137(75.4)]	7.63
High	ENSP00000309591.3	pep chromosome:GRCh38:19:14091688:14117762:-1 gene:ENSG00000072062.14 transcript:ENST00000308677.9 gene_biotype:protein_coding transcript_biotype:protein_coding gene_symbol:PRKACA description:protein kinase cAMP-activated catalytic subunit alpha [Source:HGNC Symbol;Acc:HGNC:9380]	FALSE	TRUE	11.9658	2	11	2	High	High	High	High	Phospho [T196(94.2); S339(99.9)]	20.41
High	ENSP00000489143.1	pep chromosome:GRCh38:CHR_HG2072_PATCH:82373834:82381031:1 gene:ENSG00000283085.1 transcript:ENST00000635036.1 gene_biotype:protein_coding transcript_biotype:protein_coding gene_symbol:TPBG description:trophoblast glycoprotein [Source:HGNC Symbol;Acc:HGNC:12004]	FALSE	TRUE	2.38095	1	2	1	High	High	High	High	Phospho [S418(100)]	6
High	ENSP00000377048.1	pep chromosome:GRCh38:6:63646526:63714509:1 gene:ENSG00000118482.11 transcript:ENST00000393387.5 gene_biotype:protein_coding transcript_biotype:protein_coding gene_symbol:PHF3 description:PHD finger protein 3 [Source:HGNC Symbol;Acc:HGNC:8921]	FALSE	TRUE	1.07896	1	2	1	High	High	High	High	Phospho [S1614(99.5)]	6.48
High	ENSP00000495906.1	pep chromosome:GRCh38:4:159103013:159360174:1 gene:ENSG00000109756.9 transcript:ENST00000644474.1 gene_biotype:protein_coding transcript_biotype:protein_coding gene_symbol:RAPGEF2 description:Rap guanine nucleotide exchange factor 2 [Source:HGNC Symbol;Acc:HGNC:16854]	FALSE	TRUE	2.02501	2	5	2	High	High	High	High	Phospho [S1177(99.7); S1271(99.9)]	8.74
High	ENSP00000356918.1	pep chromosome:GRCh38:6:132445867:132513116:-1 gene:ENSG00000079950.14 transcript:ENST00000367941.7 gene_biotype:protein_coding transcript_biotype:protein_coding gene_symbol:STX7 description:syntaxin 7 [Source:HGNC Symbol;Acc:HGNC:11442]	FALSE	TRUE	4.21456	1	2	1	High	High	High	High	Phospho [S129(100)]	2.99
High	ENSP00000356224.5	pep chromosome:GRCh38:6:152121687:152637362:-1 gene:ENSG00000131018.24 transcript:ENST00000367255.10 gene_biotype:protein_coding transcript_biotype:protein_coding gene_symbol:SYNE1 description:spectrin repeat containing nuclear envelope protein 1 [Source:HGNC Symbol;Acc:HGNC:17089]	FALSE	TRUE	0.36376	2	3	2	High	High	High	High	Phospho [S8305(100); T8360(99.5)]	7.38
High	ENSP00000452535.1	pep chromosome:GRCh38:14:54567097:54789127:1 gene:ENSG00000020577.13 transcript:ENST00000554335.5 gene_biotype:protein_coding transcript_biotype:protein_coding gene_symbol:SAMD4A description:sterile alpha motif domain containing 4A [Source:HGNC Symbol;Acc:HGNC:23023]	FALSE	TRUE	1.67131	1	5	1	High	High	High	High	Phospho [S419(92.7)]	9.45
High	ENSP00000338523.4	pep chromosome:GRCh38:3:172040554:172401665:1 gene:ENSG00000075420.13 transcript:ENST00000336824.8 gene_biotype:protein_coding transcript_biotype:protein_coding gene_symbol:FNDC3B description:fibronectin type III domain containing 3B [Source:HGNC Symbol;Acc:HGNC:24670]	FALSE	TRUE	1.99336	2	3	2	High	High	High	High	Phospho [S211(100); S257(99.4)]	8.43
High	ENSP00000363552.1	pep chromosome:GRCh38:9:110873778:110999466:-1 gene:ENSG00000198121.13 transcript:ENST00000374430.6 gene_biotype:protein_coding transcript_biotype:protein_coding gene_symbol:LPAR1 description:lysophosphatidic acid receptor 1 [Source:HGNC Symbol;Acc:HGNC:3166]	FALSE	TRUE	9.34066	2	4	2	High	High	High	High	Phospho [S341(100); S344(88.2)]	11.15
High	ENSP00000293443.6	pep chromosome:GRCh38:17:44353215:44363853:-1 gene:ENSG00000161682.15 transcript:ENST00000293443.12 gene_biotype:protein_coding transcript_biotype:protein_coding gene_symbol:FAM171A2 description:family with sequence similarity 171 member A2 [Source:HGNC Symbol;Acc:HGNC:30480]	FALSE	TRUE	2.66344	1	3	1	High	High	High	High	Phospho [S789(94.5)]	12.31
High	ENSP00000397367.1	pep chromosome:GRCh38:4:4267704:4290021:-1 gene:ENSG00000145220.14 transcript:ENST00000452476.5 gene_biotype:protein_coding transcript_biotype:protein_coding gene_symbol:LYAR description:Ly1 antibody reactive [Source:HGNC Symbol;Acc:HGNC:26021]	FALSE	TRUE	5.27704	2	3	2	High	High	High	High	Phospho [S258(100); S260(100); S276(100)]	8.04
High	ENSP00000362846.4	pep chromosome:GRCh38:1:30932850:31065991:-1 gene:ENSG00000134644.15 transcript:ENST00000373741.8 gene_biotype:protein_coding transcript_biotype:protein_coding gene_symbol:PUM1 description:pumilio RNA binding family member 1 [Source:HGNC Symbol;Acc:HGNC:14957]	FALSE	TRUE	1.96078	2	2	2	High	High	High	High	Phospho [S283(100); S745(99.9)]	6.2
High	ENSP00000295851.4	pep chromosome:GRCh38:2:203328394:203447728:1 gene:ENSG00000138443.16 transcript:ENST00000295851.10 gene_biotype:protein_coding transcript_biotype:protein_coding gene_symbol:ABI2 description:abl interactor 2 [Source:HGNC Symbol;Acc:HGNC:24011]	FALSE	TRUE	5.65302	2	2	2	High	High	High	High	Phospho [S183(90.2); T361(98.5)]	6.42
High	ENSP00000334642.5	pep chromosome:GRCh38:10:117277274:117375440:-1 gene:ENSG00000165650.12 transcript:ENST00000334464.7 gene_biotype:protein_coding transcript_biotype:protein_coding gene_symbol:PDZD8 description:PDZ domain containing 8 [Source:HGNC Symbol;Acc:HGNC:26974]	FALSE	TRUE	1.99307	1	2	1	High	High	High	High	Phospho [S980(99.6)]	8.63
High	ENSP00000470220.1	pep chromosome:GRCh38:19:34994784:35026471:1 gene:ENSG00000089351.14 transcript:ENST00000599564.5 gene_biotype:protein_coding transcript_biotype:protein_coding gene_symbol:GRAMD1A description:GRAM domain containing 1A [Source:HGNC Symbol;Acc:HGNC:29305]	FALSE	TRUE	5.82404	4	7	4	High	High	High	High	Phospho [S101(77.7); S134(83.7); S350(99.4); S354(96.1)]	12.44
High	ENSP00000256689.5	pep chromosome:GRCh38:12:46358188:46372773:-1 gene:ENSG00000134294.14 transcript:ENST00000256689.10 gene_biotype:protein_coding transcript_biotype:protein_coding gene_symbol:SLC38A2 description:solute carrier family 38 member 2 [Source:HGNC Symbol;Acc:HGNC:13448]	FALSE	TRUE	4.94071	1	9	1	High	High	High	High	Phospho [Y20(76.1)]	12.39
High	ENSP00000258729.3	pep chromosome:GRCh38:7:23310209:23470491:-1 gene:ENSG00000136231.14 transcript:ENST00000258729.8 gene_biotype:protein_coding transcript_biotype:protein_coding gene_symbol:IGF2BP3 description:insulin like growth factor 2 mRNA binding protein 3 [Source:HGNC Symbol;Acc:HGNC:28868]	FALSE	TRUE	3.79965	2	2	2	High	High	High	High	Phospho [S184(93.5); T528(100)]	3.07
High	ENSP00000362071.3	pep chromosome:GRCh38:20:44111695:44187578:-1 gene:ENSG00000149596.6 transcript:ENST00000372980.3 gene_biotype:protein_coding transcript_biotype:protein_coding gene_symbol:JPH2 description:junctophilin 2 [Source:HGNC Symbol;Acc:HGNC:14202]	FALSE	TRUE	5.74713	2	2	2	High	High	High	High	Phospho [S469(100); T490(99.8)]	3.88
High	ENSP00000354491.4	pep chromosome:GRCh38:14:22971819:22982338:-1 gene:ENSG00000129474.16 transcript:ENST00000361265.8 gene_biotype:protein_coding transcript_biotype:protein_coding gene_symbol:AJUBA description:ajuba LIM protein [Source:HGNC Symbol;Acc:HGNC:20250]	FALSE	TRUE	4.64684	2	3	2	High	High	High	High	Phospho [S79(100); S137(98.5)]	5.02
High	ENSP00000260210.3	pep chromosome:GRCh38:11:116748173:116772987:-1 gene:ENSG00000137656.12 transcript:ENST00000260210.5 gene_biotype:protein_coding transcript_biotype:protein_coding gene_symbol:BUD13 description:BUD13 homolog [Source:HGNC Symbol;Acc:HGNC:28199]	FALSE	TRUE	9.8546	5	7	5	High	High	High	High	Phospho [T159(100); S163(100); S248(99.9); S325(100); S358(92.1); S416(100); S416(100); S416(100); S420(100); S420(100); S420(100)]	13.68
High	ENSP00000346050.3	pep chromosome:GRCh38:4:151099628:151104642:1 gene:ENSG00000145425.10 transcript:ENST00000274065.9 gene_biotype:protein_coding transcript_biotype:protein_coding gene_symbol:RPS3A description:ribosomal protein S3A [Source:HGNC Symbol;Acc:HGNC:10421]	FALSE	TRUE	4.54545	1	2	1	High	High	High	High	Phospho [S263(100)]	5.2
High	ENSP00000315713.5	pep chromosome:GRCh38:12:108778191:108857583:-1 gene:ENSG00000084112.15 transcript:ENST00000326495.10 gene_biotype:protein_coding transcript_biotype:protein_coding gene_symbol:SSH1 description:slingshot protein phosphatase 1 [Source:HGNC Symbol;Acc:HGNC:30579]	FALSE	TRUE	5.05243	3	4	3	High	High	High	High	Phospho [S583(97.7); S937(81.6)]	6.48
High	ENSP00000453969.1	pep chromosome:GRCh38:15:40333757:40340967:-1 gene:ENSG00000188549.12 transcript:ENST00000559313.5 gene_biotype:protein_coding transcript_biotype:protein_coding gene_symbol:CCDC9B description:coiled-coil domain containing 9B [Source:HGNC Symbol;Acc:HGNC:33488]	FALSE	TRUE	5.24345	2	3	2	High	High	High	High	Phospho [S193(100); S201(90.7)]	4.52
High	ENSP00000368565.3	pep chromosome:GRCh38:7:103312289:103344767:-1 gene:ENSG00000105821.15 transcript:ENST00000379263.8 gene_biotype:protein_coding transcript_biotype:protein_coding gene_symbol:DNAJC2 description:DnaJ heat shock protein family (Hsp40) member C2 [Source:HGNC Symbol;Acc:HGNC:13192]	FALSE	TRUE	1.93237	1	4	1	High	High	High	High	Phospho [S47(100); S49(100)]	10.7
High	ENSP00000366287.1	pep chromosome:GRCh38:1:10230764:10306757:1 gene:ENSG00000054523.17 transcript:ENST00000377083.5 gene_biotype:protein_coding transcript_biotype:protein_coding gene_symbol:KIF1B description:kinesin family member 1B [Source:HGNC Symbol;Acc:HGNC:16636]	FALSE	TRUE	1.21422	1	3	1	High	High	High	High	Phospho [S663(100); S665(99.9)]	9.54
High	ENSP00000268835.2	pep chromosome:GRCh38:17:18858131:18931287:1 gene:ENSG00000141127.15 transcript:ENST00000268835.7 gene_biotype:protein_coding transcript_biotype:protein_coding gene_symbol:PRPSAP2 description:phosphoribosyl pyrophosphate synthetase associated protein 2 [Source:HGNC Symbol;Acc:HGNC:9467]	FALSE	TRUE	7.58808	1	3	1	High	High	High	High	Phospho [S227(100)]	0
High	ENSP00000420306.1	pep chromosome:GRCh38:22:29505879:29553782:-1 gene:ENSG00000100296.13 transcript:ENST00000490103.5 gene_biotype:protein_coding transcript_biotype:protein_coding gene_symbol:THOC5 description:THO complex 5 [Source:HGNC Symbol;Acc:HGNC:19074]	FALSE	TRUE	6.14934	3	3	3	High	High	High	High	Phospho [S5(78.4); S28(99.9); S307(100); S312(100); S314(100)]	5.76
High	ENSP00000479573.1	pep chromosome:GRCh38:4:186587795:186723833:-1 gene:ENSG00000083857.14 transcript:ENST00000614102.4 gene_biotype:protein_coding transcript_biotype:protein_coding gene_symbol:FAT1 description:FAT atypical cadherin 1 [Source:HGNC Symbol;Acc:HGNC:3595]	FALSE	TRUE	0.283224	1	2	1	High	High	High	High	Phospho [S4475(100); S4478(85.1)]	4.16
High	ENSP00000499830.1	pep chromosome:GRCh38:10:75111511:75182123:1 gene:ENSG00000156671.15 transcript:ENST00000671730.1 gene_biotype:protein_coding transcript_biotype:protein_coding gene_symbol:SAMD8 description:sterile alpha motif domain containing 8 [Source:HGNC Symbol;Acc:HGNC:26320]	FALSE	TRUE	6.06695	2	2	2	High	High	High	High	Phospho [S38(100); S42(100)]	6.42
High	ENSP00000269571.4	pep chromosome:GRCh38:17:39700080:39728662:1 gene:ENSG00000141736.13 transcript:ENST00000269571.9 gene_biotype:protein_coding transcript_biotype:protein_coding gene_symbol:ERBB2 description:erb-b2 receptor tyrosine kinase 2 [Source:HGNC Symbol;Acc:HGNC:3430]	FALSE	TRUE	1.51394	1	1	1	High	High	High	High	Phospho [S1054(100)]	6.2
High	ENSP00000233575.2	pep chromosome:GRCh38:2:27370616:27377535:1 gene:ENSG00000115234.11 transcript:ENST00000233575.7 gene_biotype:protein_coding transcript_biotype:protein_coding gene_symbol:SNX17 description:sorting nexin 17 [Source:HGNC Symbol;Acc:HGNC:14979]	FALSE	TRUE	1.91489	2	3	2	High	High	High	High	Phospho [S409(99.7)]	8.15
High	ENSP00000457411.1	pep chromosome:GRCh38:16:84700004:84779194:1 gene:ENSG00000103194.15 transcript:ENST00000570191.5 gene_biotype:protein_coding transcript_biotype:protein_coding gene_symbol:USP10 description:ubiquitin specific peptidase 10 [Source:HGNC Symbol;Acc:HGNC:12608]	FALSE	TRUE	3.2419	1	2	1	High	High	High	High	Phospho [S580(100)]	11.21
High	ENSP00000386264.2	pep chromosome:GRCh38:2:201620186:201643503:-1 gene:ENSG00000155755.19 transcript:ENST00000409883.7 gene_biotype:protein_coding transcript_biotype:protein_coding gene_symbol:TMEM237 description:transmembrane protein 237 [Source:HGNC Symbol;Acc:HGNC:14432]	FALSE	TRUE	2.69608	1	2	1	High	High	High	High	Phospho [S62(100)]	5.01
High	ENSP00000466074.1	pep chromosome:GRCh38:17:44036167:44066659:-1 gene:ENSG00000161654.9 transcript:ENST00000585388.1 gene_biotype:protein_coding transcript_biotype:protein_coding gene_symbol:LSM12 description:LSM12 homolog [Source:HGNC Symbol;Acc:HGNC:26407]	FALSE	TRUE	6.08696	1	3	1	High	High	High	High	Phospho [T75(93.6)]	5.48
High	ENSP00000385211.1	pep chromosome:GRCh38:19:48900320:48923271:1 gene:ENSG00000104805.16 transcript:ENST00000407032.5 gene_biotype:protein_coding transcript_biotype:protein_coding gene_symbol:NUCB1 description:nucleobindin 1 [Source:HGNC Symbol;Acc:HGNC:8043]	FALSE	TRUE	2.81996	2	2	2	High	High	High	High	Phospho [S369(100)]	3.32
High	ENSP00000013125.4	pep chromosome:GRCh38:14:50418525:50532609:-1 gene:ENSG00000012983.11 transcript:ENST00000013125.8 gene_biotype:protein_coding transcript_biotype:protein_coding gene_symbol:MAP4K5 description:mitogen-activated protein kinase kinase kinase kinase 5 [Source:HGNC Symbol;Acc:HGNC:6867]	FALSE	TRUE	2.71868	2	5	2	High	High	High	High	Phospho [S335(100); Y401(90.1)]	8.54
High	ENSP00000498679.1	pep chromosome:GRCh38:17:2689388:2711764:-1 gene:ENSG00000132361.17 transcript:ENST00000651024.1 gene_biotype:protein_coding transcript_biotype:protein_coding gene_symbol:CLUH description:clustered mitochondria homolog [Source:HGNC Symbol;Acc:HGNC:29094]	FALSE	TRUE	1.70623	1	1	1	High	High	High	High	Phospho [S702(100)]	5.74
High	ENSP00000346762.3	pep chromosome:GRCh38:7:127652194:128092593:1 gene:ENSG00000197157.11 transcript:ENST00000354725.8 gene_biotype:protein_coding transcript_biotype:protein_coding gene_symbol:SND1 description:staphylococcal nuclease and tudor domain containing 1 [Source:HGNC Symbol;Acc:HGNC:30646]	FALSE	TRUE	4.50549	2	2	2	High	High	High	High	Phospho [S150(100); S426(83.5)]	5.66
High	ENSP00000262426.4	pep chromosome:GRCh38:16:86510527:86515422:1 gene:ENSG00000103241.7 transcript:ENST00000262426.6 gene_biotype:protein_coding transcript_biotype:protein_coding gene_symbol:FOXF1 description:forkhead box F1 [Source:HGNC Symbol;Acc:HGNC:3809]	FALSE	TRUE	2.90237	1	4	1	High	High	High	High	Phospho [S335(100)]	10.29
High	ENSP00000283195.6	pep chromosome:GRCh38:2:108719482:108785809:1 gene:ENSG00000153201.16 transcript:ENST00000283195.11 gene_biotype:protein_coding transcript_biotype:protein_coding gene_symbol:RANBP2 description:RAN binding protein 2 [Source:HGNC Symbol;Acc:HGNC:9848]	FALSE	TRUE	1.14764	3	3	3	High	High	High	High	Phospho [S1400(94.1); S2668(99.8)]	7.96
High	ENSP00000482515.1	pep chromosome:GRCh38:2:200308950:200482256:1 gene:ENSG00000196141.14 transcript:ENST00000619961.4 gene_biotype:protein_coding transcript_biotype:protein_coding gene_symbol:SPATS2L description:spermatogenesis associated serine rich 2 like [Source:HGNC Symbol;Acc:HGNC:24574]	FALSE	TRUE	5.10204	2	4	2	High	High	High	High	Phospho [S145(88.1); S485(95.4)]	6.23
High	ENSP00000353373.2	pep chromosome:GRCh38:17:57862976:57903389:-1 gene:ENSG00000180891.13 transcript:ENST00000360238.6 gene_biotype:protein_coding transcript_biotype:protein_coding gene_symbol:CUEDC1 description:CUE domain containing 1 [Source:HGNC Symbol;Acc:HGNC:31350]	FALSE	TRUE	3.88601	2	6	2	High	High	High	High	Phospho [S9(88.4)]	2.12
High	ENSP00000381698.2	pep chromosome:GRCh38:8:144098637:144103773:-1 gene:ENSG00000179526.17 transcript:ENST00000398712.7 gene_biotype:protein_coding transcript_biotype:protein_coding gene_symbol:SHARPIN description:SHANK associated RH domain interactor [Source:HGNC Symbol;Acc:HGNC:25321]	FALSE	TRUE	4.65116	2	3	2	High	High	High	High	Phospho [S165(100)]	6.34
High	ENSP00000296543.4	pep chromosome:GRCh38:4:139301505:139391384:1 gene:ENSG00000164134.13 transcript:ENST00000296543.10 gene_biotype:protein_coding transcript_biotype:protein_coding gene_symbol:NAA15 description:N(alpha)-acetyltransferase 15, NatA auxiliary subunit [Source:HGNC Symbol;Acc:HGNC:30782]	FALSE	TRUE	2.07852	1	3	1	High	High	High	High	Phospho [S855(94.9)]	5.2
High	ENSP00000413964.3	pep chromosome:GRCh38:19:34172568:34229288:1 gene:ENSG00000257103.8 transcript:ENST00000433627.9 gene_biotype:protein_coding transcript_biotype:protein_coding gene_symbol:LSM14A description:LSM14A mRNA processing body assembly factor [Source:HGNC Symbol;Acc:HGNC:24489]	FALSE	TRUE	5.18359	3	6	3	High	High	High	High	Phospho [S183(92.9); S216(97.9)]	9.84
High	ENSP00000301067.7	pep chromosome:GRCh38:12:49018975:49055324:-1 gene:ENSG00000167548.15 transcript:ENST00000301067.11 gene_biotype:protein_coding transcript_biotype:protein_coding gene_symbol:KMT2D description:lysine methyltransferase 2D [Source:HGNC Symbol;Acc:HGNC:7133]	FALSE	TRUE	0.848835	3	3	3	High	High	High	High	Phospho [S1180(100); S1671(100); S4738(100)]	9.66
High	ENSP00000479636.1	pep chromosome:GRCh38:17:45108959:45132515:-1 gene:ENSG00000161714.12 transcript:ENST00000619929.5 gene_biotype:protein_coding transcript_biotype:protein_coding gene_symbol:PLCD3 description:phospholipase C delta 3 [Source:HGNC Symbol;Acc:HGNC:9061]	FALSE	TRUE	3.16857	1	2	1	High	High	High	High	Phospho [S496(100)]	10.29
High	ENSP00000380413.2	pep chromosome:GRCh38:7:151086475:151144434:1 gene:ENSG00000133612.19 transcript:ENST00000397238.7 gene_biotype:protein_coding transcript_biotype:protein_coding gene_symbol:AGAP3 description:ArfGAP with GTPase domain, ankyrin repeat and PH domain 3 [Source:HGNC Symbol;Acc:HGNC:16923]	FALSE	TRUE	2.5247	2	3	2	High	High	High	High	Phospho [S574(100)]	2.54
High	ENSP00000253363.6	pep chromosome:GRCh38:20:35701347:35742260:-1 gene:ENSG00000131051.24 transcript:ENST00000253363.11 gene_biotype:protein_coding transcript_biotype:protein_coding gene_symbol:RBM39 description:RNA binding motif protein 39 [Source:HGNC Symbol;Acc:HGNC:15923]	FALSE	TRUE	4.90566	2	5	2	High	High	High	High	Phospho [S97(99.5); S136(100)]	5.26
High	ENSP00000357459.4	pep chromosome:GRCh38:1:154582057:154608186:-1 gene:ENSG00000160710.17 transcript:ENST00000368474.9 gene_biotype:protein_coding transcript_biotype:protein_coding gene_symbol:ADAR description:adenosine deaminase RNA specific [Source:HGNC Symbol;Acc:HGNC:225]	FALSE	TRUE	2.03915	2	2	2	High	High	High	High	Phospho [T601(93.8); S825(100)]	6.73
High	ENSP00000240123.7	pep chromosome:GRCh38:8:22551695:22575788:1 gene:ENSG00000120896.13 transcript:ENST00000240123.11 gene_biotype:protein_coding transcript_biotype:protein_coding gene_symbol:SORBS3 description:sorbin and SH3 domain containing 3 [Source:HGNC Symbol;Acc:HGNC:30907]	FALSE	TRUE	3.27869	2	3	2	High	High	High	High	Phospho [S530(99.6); S545(99.4)]	8.65
High	ENSP00000366702.5	pep chromosome:GRCh38:1:8011727:8026309:-1 gene:ENSG00000116285.13 transcript:ENST00000377482.10 gene_biotype:protein_coding transcript_biotype:protein_coding gene_symbol:ERRFI1 description:ERBB receptor feedback inhibitor 1 [Source:HGNC Symbol;Acc:HGNC:18185]	FALSE	TRUE	5.19481	2	4	2	High	High	High	High	Phospho [S273(99.9); S369(100)]	7.86
High	ENSP00000457723.1	pep chromosome:GRCh38:16:2253130:2267603:-1 gene:ENSG00000205937.12 transcript:ENST00000565678.5 gene_biotype:protein_coding transcript_biotype:protein_coding gene_symbol:RNPS1 description:RNA binding protein with serine rich domain 1 [Source:HGNC Symbol;Acc:HGNC:10080]	FALSE	TRUE	10.1639	3	5	2	High	High	High	High	Phospho [S69(87.2); S125(98.7); S274(100); S276(100)]	4.62
High	ENSP00000378752.1	pep chromosome:GRCh38:20:62877743:62926503:-1 gene:ENSG00000101191.16 transcript:ENST00000395343.5 gene_biotype:protein_coding transcript_biotype:protein_coding gene_symbol:DIDO1 description:death inducer-obliterator 1 [Source:HGNC Symbol;Acc:HGNC:2680]	FALSE	TRUE	1.91964	2	2	2	High	High	High	High	Phospho [T151(100); S152(100); S154(98.6); S805(99.8); S809(100)]	6.4
High	ENSP00000471605.1	pep chromosome:GRCh38:19:17267443:17279337:1 gene:ENSG00000105393.16 transcript:ENST00000598188.6 gene_biotype:protein_coding transcript_biotype:protein_coding gene_symbol:BABAM1 description:BRISC and BRCA1 A complex member 1 [Source:HGNC Symbol;Acc:HGNC:25008]	FALSE	TRUE	3.34347	2	5	2	High	High	High	High	Phospho [S29(100)]	10.46
High	ENSP00000298281.4	pep chromosome:GRCh38:11:83156988:83187451:1 gene:ENSG00000165494.11 transcript:ENST00000298281.8 gene_biotype:protein_coding transcript_biotype:protein_coding gene_symbol:PCF11 description:PCF11 cleavage and polyadenylation factor subunit [Source:HGNC Symbol;Acc:HGNC:30097]	FALSE	TRUE	1.15756	2	3	1	High	High	High	High	Phospho [S480(100); S482(100); S484(100); S1520(100)]	5.87
High	ENSP00000481892.1	pep chromosome:GRCh38:2:10783393:10820864:-1 gene:ENSG00000143870.12 transcript:ENST00000617249.4 gene_biotype:protein_coding transcript_biotype:protein_coding gene_symbol:PDIA6 description:protein disulfide isomerase family A member 6 [Source:HGNC Symbol;Acc:HGNC:30168]	FALSE	TRUE	6.70732	2	3	2	High	High	High	High	Phospho [S480(100)]	11.85
High	ENSP00000386759.3	pep chromosome:GRCh38:3:47016689:47163967:-1 gene:ENSG00000181555.20 transcript:ENST00000409792.3 gene_biotype:protein_coding transcript_biotype:protein_coding gene_symbol:SETD2 description:SET domain containing 2, histone lysine methyltransferase [Source:HGNC Symbol;Acc:HGNC:18420]	FALSE	TRUE	1.32605	3	3	3	High	High	High	High	Phospho [S614(100); S754(100); S2080(88.8); S2082(99.7)]	7.4
High	ENSP00000345728.6	pep chromosome:GRCh38:X:77910693:78050395:1 gene:ENSG00000165240.20 transcript:ENST00000341514.11 gene_biotype:protein_coding transcript_biotype:protein_coding gene_symbol:ATP7A description:ATPase copper transporting alpha [Source:HGNC Symbol;Acc:HGNC:869]	FALSE	TRUE	1.33333	1	2	1	High	High	High	High	Phospho [S270(99.5)]	5.86
High	ENSP00000339723.3	pep chromosome:GRCh38:2:174348022:174395712:-1 gene:ENSG00000138433.16 transcript:ENST00000342016.8 gene_biotype:protein_coding transcript_biotype:protein_coding gene_symbol:CIR1 description:corepressor interacting with RBPJ, 1 [Source:HGNC Symbol;Acc:HGNC:24217]	FALSE	TRUE	5.77778	1	1	1	High	High	High	High	Phospho [S202(100)]	6.66
High	ENSP00000302037.4	pep chromosome:GRCh38:2:227325239:227357833:1 gene:ENSG00000168958.19 transcript:ENST00000353339.7 gene_biotype:protein_coding transcript_biotype:protein_coding gene_symbol:MFF description:mitochondrial fission factor [Source:HGNC Symbol;Acc:HGNC:24858]	FALSE	TRUE	2.33918	1	7	1	High	High	High	High	Phospho [S157(99.8)]	8.4
High	ENSP00000485698.1	pep chromosome:GRCh38:6:107028569:107051335:1 gene:ENSG00000130349.10 transcript:ENST00000625458.1 gene_biotype:protein_coding transcript_biotype:protein_coding gene_symbol:MTRES1 description:mitochondrial transcription rescue factor 1 [Source:HGNC Symbol;Acc:HGNC:17971]	FALSE	TRUE	12.2449	1	3	1	High	High	High	High	Phospho [S111(99.5); S121(97.2)]	7.24
High	ENSP00000427211.1	pep chromosome:GRCh38:4:40810027:41214542:-1 gene:ENSG00000163697.17 transcript:ENST00000508593.6 gene_biotype:protein_coding transcript_biotype:protein_coding gene_symbol:APBB2 description:amyloid beta precursor protein binding family B member 2 [Source:HGNC Symbol;Acc:HGNC:582]	FALSE	TRUE	3.42556	2	2	2	High	High	High	High	Phospho [T62(99.6); S410(100); S413(100)]	4.68
High	ENSP00000381577.2	pep chromosome:GRCh38:2:61187463:61471087:-1 gene:ENSG00000115464.15 transcript:ENST00000398571.7 gene_biotype:protein_coding transcript_biotype:protein_coding gene_symbol:USP34 description:ubiquitin specific peptidase 34 [Source:HGNC Symbol;Acc:HGNC:20066]	FALSE	TRUE	0.733221	2	3	2	High	High	High	High	Phospho [S1469(99.9); S1473(90.4)]	9.4
High	ENSP00000466259.1	pep chromosome:GRCh38:17:41866917:41918962:-1 gene:ENSG00000131473.17 transcript:ENST00000590151.5 gene_biotype:protein_coding transcript_biotype:protein_coding gene_symbol:ACLY description:ATP citrate lyase [Source:HGNC Symbol;Acc:HGNC:115]	FALSE	TRUE	1.99818	2	8	2	High	High	High	High	Phospho [S455(99.6); S481(100)]	7.18
High	ENSP00000491981.1	pep chromosome:GRCh38:10:76877725:77637775:-1 gene:ENSG00000156113.23 transcript:ENST00000638606.1 gene_biotype:protein_coding transcript_biotype:protein_coding gene_symbol:KCNMA1 description:potassium calcium-activated channel subfamily M alpha 1 [Source:HGNC Symbol;Acc:HGNC:6284]	FALSE	TRUE	3.64668	3	5	3	High	High	High	High	Met-loss+Acetyl [N-Term]; Phospho [S724(93); S728(99.4)]	2.03
High	ENSP00000360718.3	pep chromosome:GRCh38:1:51907956:51990700:-1 gene:ENSG00000169213.7 transcript:ENST00000371655.4 gene_biotype:protein_coding transcript_biotype:protein_coding gene_symbol:RAB3B description:RAB3B, member RAS oncogene family [Source:HGNC Symbol;Acc:HGNC:9778]	FALSE	TRUE	11.8721	2	3	2	High	High	High	High	Phospho [Y84(91.3); S190(98.6)]	9.17
High	ENSP00000498676.1	pep chromosome:GRCh38:4:185209577:185363966:1 gene:ENSG00000109762.16 transcript:ENST00000652585.1 gene_biotype:protein_coding transcript_biotype:protein_coding gene_symbol:SNX25 description:sorting nexin 25 [Source:HGNC Symbol;Acc:HGNC:21883]	FALSE	TRUE	2.58964	1	1	1	High	High	High	High	Phospho [S829(99.8); S832(98.8)]	7.32
High	ENSP00000343745.3	pep chromosome:GRCh38:14:95086228:95157422:-1 gene:ENSG00000100697.14 transcript:ENST00000343455.7 gene_biotype:protein_coding transcript_biotype:protein_coding gene_symbol:DICER1 description:dicer 1, ribonuclease III [Source:HGNC Symbol;Acc:HGNC:17098]	FALSE	TRUE	1.19667	1	1	1	High	High	High	High	Phospho [S413(100); S415(100)]	5.74
High	ENSP00000465387.1	pep chromosome:GRCh38:19:12689216:12696581:-1 gene:ENSG00000132004.13 transcript:ENST00000587955.1 gene_biotype:protein_coding transcript_biotype:protein_coding gene_symbol:FBXW9 description:F-box and WD repeat domain containing 9 [Source:HGNC Symbol;Acc:HGNC:28136]	FALSE	TRUE	5.23013	2	3	1	High	High	High	High	Phospho [S18(99.9); S39(100)]	4.24
High	ENSP00000379496.1	pep chromosome:GRCh38:7:31751179:32299329:-1 gene:ENSG00000154678.18 transcript:ENST00000396193.5 gene_biotype:protein_coding transcript_biotype:protein_coding gene_symbol:PDE1C description:phosphodiesterase 1C [Source:HGNC Symbol;Acc:HGNC:8776]	FALSE	TRUE	4.6814	2	4	2	High	High	High	High	Phospho [T18(97); S20(86.9); S529(99.5)]	7.66
High	ENSP00000417273.1	pep chromosome:GRCh38:3:136862208:136951606:1 gene:ENSG00000158092.7 transcript:ENST00000481752.6 gene_biotype:protein_coding transcript_biotype:protein_coding gene_symbol:NCK1 description:NCK adaptor protein 1 [Source:HGNC Symbol;Acc:HGNC:7664]	FALSE	TRUE	5.83554	2	2	2	High	High	High	High	Phospho [S85(100)]	6.79
[truncated: 869 more rows]
