# Supplementary material for: SARS-CoV-2 candidate vaccine ChAdOx1 nCoV-19 infection of human cell lines reveals a normal low range of viral backbone gene expression alongside very high levels of SARS-CoV-2 S glycoprotein expression.
Source: Research Square preprint supplement (doi:10.21203/rs.3.rs-94837/v1), 2020-10-20
Supplement: Supplementary file 2 [file bfdaf2e35355c7a5e8aa6214.xlsx]

## Sheet: Proteins
Protein FDR Confidence	Accession	Description	Contaminant	Human+Chadox	Coverage	# Peptides	# PSMs	# Unique Peptides	Found in Sample: [S1] F1: 127C, Sample, Mock	Found in Sample: [S2] F1: 128C, Sample, 24	Found in Sample: [S3] F1: 129C, Sample, 72	Found in Sample: [S4] F1: 130C, Sample, 48	Modifications	Score Sequest HT
High	ENSP00000301740.8	pep chromosome:GRCh38:16:2752638:2771412:1 gene:ENSG00000167978.17 transcript:ENST00000301740.13 gene_biotype:protein_coding transcript_biotype:protein_coding gene_symbol:SRRM2 description:serine/arginine repetitive matrix 2 [Source:HGNC Symbol;Acc:HGNC:16639]	FALSE	TRUE	45.0581	134	541	131	High	High	High	High	Phospho [S180(84); S182(99.8); T184(100); S200(99.1); S220(100); S222(99.5); S231(100); T233(100); S250(100); T251(100); T252(100); T274(91.2); S277(99.3); S279(98.2); S297(99.4); S353(100); S387(87.7); S440(100); S456(99.6); S484(100); S486(100); S495(100); S497(100); T499(100); S506(100); S508(100); S510(100); S713(100); S715(100); T717(100); S741(90.5); S745(100); S746(100); S819(86.9); S820(8…	777.65
High	ENSP00000296755.7	pep chromosome:GRCh38:5:72107475:72209565:1 gene:ENSG00000131711.15 transcript:ENST00000296755.12 gene_biotype:protein_coding transcript_biotype:protein_coding gene_symbol:MAP1B description:microtubule associated protein 1B [Source:HGNC Symbol;Acc:HGNC:6836]	FALSE	TRUE	29.7002	54	236	54	High	High	High	High	Phospho [S343(99.5); S561(100); S614(100); T704(100); S831(95); S891(100); S937(100); S970(100); S995(100); S1016(100); T1067(100); S1076(100); S1154(98.3); S1252(99.9); S1265(100); T1282(100); S1298(88.4); S1330(88.1); S1389(100); S1427(100); T1633(97.6); S1653(99.5); S1785(99.5); S1793(94.4); S1819(91.6); S1899(99.8); S1915(87.6); T1932(99.4); T1949(94.7); S1965(92.8); T2015(89.8); T2034(100); …	484.06
High	ENSP00000356110.4	pep chromosome:GRCh38:1:205712822:205750182:-1 gene:ENSG00000069275.13 transcript:ENST00000367142.5 gene_biotype:protein_coding transcript_biotype:protein_coding gene_symbol:NUCKS1 description:nuclear casein kinase and cyclin dependent kinase substrate 1 [Source:HGNC Symbol;Acc:HGNC:29923]	FALSE	TRUE	64.6091	22	255	22	High	High	High	High	Phospho [S19(100); S61(99.4); S79(100); S113(100); S144(100); S181(100); T202(100); S204(100); S214(100); S234(100)]	669.45
High	ENSP00000363510.3	pep chromosome:GRCh38:1:24643299:24672626:1 gene:ENSG00000133226.17 transcript:ENST00000374389.8 gene_biotype:protein_coding transcript_biotype:protein_coding gene_symbol:SRRM1 description:serine and arginine repetitive matrix 1 [Source:HGNC Symbol;Acc:HGNC:16638]	FALSE	TRUE	49.5071	72	291	70	High	High	High	High	Phospho [S169(100); S171(100); S187(99.6); S209(99.3); T220(100); S260(100); S346(98.7); S364(100); S384(100); T401(90.3); T411(100); S424(100); S426(100); S445(90.2); S460(87.8); S473(100); S525(100); S527(100); S547(100); S558(100); S560(100); S569(100); S571(100); T581(100); T583(100); S592(100); S599(100); S601(100); S616(100); S625(100); S637(100); S645(100); S647(100); S662(99.7); S705(99.6…	340.93
High	ENSP00000295321.4	pep chromosome:GRCh38:2:127480812:127526489:-1 gene:ENSG00000163166.15 transcript:ENST00000295321.9 gene_biotype:protein_coding transcript_biotype:protein_coding gene_symbol:IWS1 description:interacts with SUPT6H, CTD assembly factor 1 [Source:HGNC Symbol;Acc:HGNC:25467]	FALSE	TRUE	43.2234	31	197	31	High	High	High	High	Phospho [T42(97.9); S54(92.9); S120(89.8); S157(100); S159(100); S185(96.3); S196(100); S209(99.7); S289(99.4); S304(99.2); T317(93.9); S363(91.5); S377(100); S398(100); S429(99.2); S440(100); S492(100); S492(100); S492(100); S492(100); S492(100); S492(100); S494(99.7); S494(99.2); S494(99.3); S494(100); S494(100); S494(100); S513(91.8); S520(98.1); S520(96.2); S520(96.2); S520(100); S520(100); S…	508.03
High	ENSP00000299601.5	pep chromosome:GRCh38:15:51938025:51971778:-1 gene:ENSG00000166477.13 transcript:ENST00000299601.10 gene_biotype:protein_coding transcript_biotype:protein_coding gene_symbol:LEO1 description:LEO1 homolog, Paf1/RNA polymerase II complex component [Source:HGNC Symbol;Acc:HGNC:30401]	FALSE	TRUE	48.6486	30	130	30	High	High	High	High	Phospho [S72(96.3); S75(99.1); S84(96.4); S127(99.9); S130(100); S140(100); S154(100); S162(100); S179(100); S197(100); S205(100); S212(100); S238(100); S254(100); S271(100); S279(100); S300(100); S630(99.7); S658(100)]	309.76
High	ENSP00000493815.1	pep chromosome:GRCh38:5:150357704:150400293:1 gene:ENSG00000070814.20 transcript:ENST00000643257.1 gene_biotype:protein_coding transcript_biotype:protein_coding gene_symbol:TCOF1 description:treacle ribosome biogenesis factor 1 [Source:HGNC Symbol;Acc:HGNC:11654]	FALSE	TRUE	30.8261	34	148	1	High	High	High	High	Phospho [T84(90); S85(83.2); S156(100); S233(100); S279(99.4); S349(100); S381(100); S419(90.3); S484(98.6); S545; S547; S548; S777(100); S818(100); S818(100); S818(100); S818(100); S818(100); S906(100); T914(100); S990(99.9); S996(76.6); S1111(79.3); S1150(91.6); S1258(100); S1351(100); S1377(97.2); S1411(98.8); S1472(99.7)]	326.89
High	ENSP00000427484.1	pep chromosome:GRCh38:5:150357747:150399966:1 gene:ENSG00000070814.20 transcript:ENST00000513346.5 gene_biotype:protein_coding transcript_biotype:protein_coding gene_symbol:TCOF1 description:treacle ribosome biogenesis factor 1 [Source:HGNC Symbol;Acc:HGNC:11654]	FALSE	TRUE	30.7796	34	146	1	High	High	High	High	Phospho [T84(90); S85(83.2); S156(100); S233(100); S279(99.4); S349(100); S381(100); S419(90.3); S484(98.6); S545; S547; S548; S777(100); S818(100); S818(100); S818(100); S818(100); S818(100); S906(100); T914(100); S941(99.8); S1027(99.9); S1033(76.6); S1149(91.6); S1257(100); S1350(100); S1376(97.2); S1410(98.8); S1471(99.7)]	323.18
High	ENSP00000385410.1	pep chromosome:GRCh38:10:102152176:102163871:1 gene:ENSG00000166197.16 transcript:ENST00000405356.5 gene_biotype:protein_coding transcript_biotype:protein_coding gene_symbol:NOLC1 description:nucleolar and coiled-body phosphoprotein 1 [Source:HGNC Symbol;Acc:HGNC:15608]	FALSE	TRUE	38.646	28	187	28	High	High	High	High	Phospho [S129(95.5); S169(86.5); T188(99.2); T238(100); S373(79); S442(95); S476(99.5); S526(99.3); S548(100); S573(100); T607(100)]	320.22
High	ENSP00000360609.1	pep chromosome:GRCh38:6:44247866:44253883:1 gene:ENSG00000096384.20 transcript:ENST00000371554.2 gene_biotype:protein_coding transcript_biotype:protein_coding gene_symbol:HSP90AB1 description:heat shock protein 90 alpha family class B member 1 [Source:HGNC Symbol;Acc:HGNC:5258]	FALSE	TRUE	37.4309	26	88	16	High	High	High	High	Phospho [S226(100); S255(100)]	259.89
High	ENSP00000435210.1	pep chromosome:GRCh38:6:136256627:136289846:-1 gene:ENSG00000029363.17 transcript:ENST00000531224.6 gene_biotype:protein_coding transcript_biotype:protein_coding gene_symbol:BCLAF1 description:BCL2 associated transcription factor 1 [Source:HGNC Symbol;Acc:HGNC:16863]	FALSE	TRUE	27.9348	32	116	8	High	High	High	High	Phospho [S11(94.6); S13(100); S102(100); S104(100); S153(80.8); S161(100); S177(100); S222(99.6); S268(99.9); S385(100); S397(100); S512(94.2); S531(100); S648(100); S658(100); S717(90.4); S718(90.4); S760(99.6); S762(99.6); T840(99.6); S884(94.9)]	201.86
High	ENSP00000318195.4	pep chromosome:GRCh38:2:231453531:231464484:-1 gene:ENSG00000115053.16 transcript:ENST00000322723.9 gene_biotype:protein_coding transcript_biotype:protein_coding gene_symbol:NCL description:nucleolin [Source:HGNC Symbol;Acc:HGNC:7667]	FALSE	TRUE	35.493	22	100	22	High	High	High	High	Phospho [S67(100); T99(100); S145(100); S206(99.4); S563(100); S580(99.8); S619(100)]	258.25
High	ENSP00000335153.7	pep chromosome:GRCh38:14:102081049:102139686:-1 gene:ENSG00000080824.18 transcript:ENST00000334701.11 gene_biotype:protein_coding transcript_biotype:protein_coding gene_symbol:HSP90AA1 description:heat shock protein 90 alpha family class A member 1 [Source:HGNC Symbol;Acc:HGNC:5253]	FALSE	TRUE	28.9227	28	72	18	High	High	High	High	Phospho [S353(100); S385(100); S575(100)]	203.92
High	ENSP00000367263.4	pep chromosome:GRCh38:11:62515902:62546806:-1 gene:ENSG00000124942.14 transcript:ENST00000378024.9 gene_biotype:protein_coding transcript_biotype:protein_coding gene_symbol:AHNAK description:AHNAK nucleoprotein [Source:HGNC Symbol;Acc:HGNC:347]	FALSE	TRUE	5.19525	27	76	27	High	High	High	High	Phospho [S41(99.9); S93(87.8); S135(100); S177(99.8); T490(100); S511(100); S559(94.6); S570(99.6); S2397(100); S3412(100); S3426(100); S5077(100); S5110(100); S5448(100); S5552(100); S5731(89.2); S5763(91.2); S5782(99.6); S5841(99.8)]	148.64
High	ENSP00000384537.2	pep chromosome:GRCh38:6:151239967:151358559:1 gene:ENSG00000131016.17 transcript:ENST00000402676.7 gene_biotype:protein_coding transcript_biotype:protein_coding gene_symbol:AKAP12 description:A-kinase anchoring protein 12 [Source:HGNC Symbol;Acc:HGNC:370]	FALSE	TRUE	19.0797	22	89	22	High	High	High	High	Phospho [S11(92.4); T289(88.2); S371(99.7); S381(77); S483(100); S514(100); S544(99.9); S598(100); S612(100); S629(89.5); T646(90.9); S696(100); S697(100); S698(100); T1116(99.8); S1331(100); S1395(100)]	201.78
High	ENSP00000355013.2	pep chromosome:GRCh38:11:10751246:10779746:1 gene:ENSG00000198730.9 transcript:ENST00000361367.7 gene_biotype:protein_coding transcript_biotype:protein_coding gene_symbol:CTR9 description:CTR9 homolog, Paf1/RNA polymerase II complex component [Source:HGNC Symbol;Acc:HGNC:16850]	FALSE	TRUE	13.2992	17	75	17	High	High	High	High	Phospho [S943(100); S970(100); S1043(100); S1059(99.4); S1066(99.6); S1072(100); S1087(93.5); S1102(100); S1151(100)]	169.14
High	ENSP00000289371.5	pep chromosome:GRCh38:2:99337389:99401326:1 gene:ENSG00000158417.11 transcript:ENST00000289371.11 gene_biotype:protein_coding transcript_biotype:protein_coding gene_symbol:EIF5B description:eukaryotic translation initiation factor 5B [Source:HGNC Symbol;Acc:HGNC:30793]	FALSE	TRUE	8.68852	14	90	14	High	High	High	High	Phospho [S113(100); S164(98.4); S190(100); S214(100); S588(93.2)]	263.85
High	ENSP00000362441.4	pep chromosome:GRCh38:X:77504878:77786216:-1 gene:ENSG00000085224.22 transcript:ENST00000373344.10 gene_biotype:protein_coding transcript_biotype:protein_coding gene_symbol:ATRX description:ATRX chromatin remodeler [Source:HGNC Symbol;Acc:HGNC:886]	FALSE	TRUE	12.8411	26	85	26	High	High	High	High	Phospho [S34(98.2); S598(91.7); S784(89.9); S819(100); S875(100); S876(100); S978(99.8); S1061(99.2); S1073(100); S1076(99.6); S1109(94.8); S1156(94.2); S1291(88.8); S1326(95.3); S1352(100); S1527(100); S1944(88); S1991(76.7); S1992(81.9)]	173.31
High	ENSP00000489867.2	pep chromosome:GRCh38:20:36154740:36232799:1 gene:ENSG00000088367.23 transcript:ENST00000636016.2 gene_biotype:protein_coding transcript_biotype:protein_coding gene_symbol:EPB41L1 description:erythrocyte membrane protein band 4.1 like 1 [Source:HGNC Symbol;Acc:HGNC:3378]	FALSE	TRUE	11.0972	22	65	22	High	High	High	High	Phospho [S75(100); T79(89.6); S461(100); S466(100); S541(92.7); S1279(100); S1293(100); S1393(100); S1498(100); S1584(100)]	153.19
High	ENSP00000437271.1	pep chromosome:GRCh38:11:57299644:57322197:-1 gene:ENSG00000149115.14 transcript:ENST00000532437.1 gene_biotype:protein_coding transcript_biotype:protein_coding gene_symbol:TNKS1BP1 description:tankyrase 1 binding protein 1 [Source:HGNC Symbol;Acc:HGNC:19081]	FALSE	TRUE	16.8884	22	69	22	High	High	High	High	Phospho [S178(100); S228(97.5); T239(100); S494(99.3); S601(100); S672(100); S691(100); S717(99); S836(100); S851(99.1); S893(100); S983(88.7); S1533(98.6); S1620(100); S1621(100); S1652(100); S1666(100)]	213.3
High	ENSP00000424063.1	pep chromosome:GRCh38:5:179698417:179728907:1 gene:ENSG00000127022.15 transcript:ENST00000504734.5 gene_biotype:protein_coding transcript_biotype:protein_coding gene_symbol:CANX description:calnexin [Source:HGNC Symbol;Acc:HGNC:1473]	FALSE	TRUE	16.723	11	91	11	High	High	High	High	Phospho [S564(100); S583(100)]	235.79
High	ENSP00000433825.1	pep chromosome:GRCh38:1:36224432:36304148:1 gene:ENSG00000054118.15 transcript:ENST00000469141.6 gene_biotype:protein_coding transcript_biotype:protein_coding gene_symbol:THRAP3 description:thyroid hormone receptor associated protein 3 [Source:HGNC Symbol;Acc:HGNC:22964]	FALSE	TRUE	26.911	36	87	33	High	High	High	High	Phospho [S53(100); Y54(95.6); Y118(92.2); S134(100); S136(100); S207(89.8); S232(84.7); S243(100); S248(100); S320(99.1); S379(95); S406(100); S408(100); S444(100); S535(95.2); S622(93.8); S672(100); S698(100); S749(91.8); S753(100); T874(99.6); S939(100)]	114.05
High	ENSP00000407602.2	pep chromosome:GRCh38:3:47851094:48088841:-1 gene:ENSG00000047849.21 transcript:ENST00000426837.6 gene_biotype:protein_coding transcript_biotype:protein_coding gene_symbol:MAP4 description:microtubule associated protein 4 [Source:HGNC Symbol;Acc:HGNC:6862]	FALSE	TRUE	10.6226	22	54	22	High	High	High	High	Phospho [S60(94.9); S297(99.6); T538(100); T588(100); T644(97.8); S653(100); S723(100); S769(100); S769(100); S770(100); S770(100); S770(100); S770(100); S770(100); S774(100); S774(100); S774(100); S806(100); S1679(100); S1841(100); S1932(91.2); S2086(93.6); S2218(100); S2296(100)]	99
High	ENSP00000436501.1	pep chromosome:GRCh38:6:136259351:136289781:-1 gene:ENSG00000029363.17 transcript:ENST00000530767.5 gene_biotype:protein_coding transcript_biotype:protein_coding gene_symbol:BCLAF1 description:BCL2 associated transcription factor 1 [Source:HGNC Symbol;Acc:HGNC:16863]	FALSE	TRUE	27.3092	25	79	1	High	High	High	High	Phospho [S11(94.6); S13(100); S102(100); S104(100); S153(80.8); S161(100); S177(100); S222(99.6); S268(99.9); S339(100); S358(100); S475(100); S485(100); S544(90.4); S545(90.4); S587(99.6); S589(99.6); T667(99.6); S711(94.9)]	112.65
High	ENSP00000371475.4	pep chromosome:GRCh38:15:43403061:43493171:-1 gene:ENSG00000067369.13 transcript:ENST00000382044.8 gene_biotype:protein_coding transcript_biotype:protein_coding gene_symbol:TP53BP1 description:tumor protein p53 binding protein 1 [Source:HGNC Symbol;Acc:HGNC:11999]	FALSE	TRUE	19.0693	23	46	23	High	High	High	High	Phospho [S270(100); S299(100); S321(93.6); S371(100); S385(93.9); S505(100); S557(100); S645(94.7); S732(100); S836(90.1); T927(100); S1099(99.9); S1119(94.4); S1367(100); S1435(100); S1467(88.6); S1683(100)]	120.28
High	ENSP00000296930.5	pep chromosome:GRCh38:5:171387648:171411137:1 gene:ENSG00000181163.13 transcript:ENST00000296930.9 gene_biotype:protein_coding transcript_biotype:protein_coding gene_symbol:NPM1 description:nucleophosmin 1 [Source:HGNC Symbol;Acc:HGNC:7910]	FALSE	TRUE	52.381	12	87	12	High	High	High	High	Phospho [S70(100); S125(100); T199(99.9); S243(93.8); S254(100)]	305.17
High	ENSP00000389639.1	pep chromosome:GRCh38:1:42682987:42702349:1 gene:ENSG00000065978.19 transcript:ENST00000436427.1 gene_biotype:protein_coding transcript_biotype:protein_coding gene_symbol:YBX1 description:Y-box binding protein 1 [Source:HGNC Symbol;Acc:HGNC:8014]	FALSE	TRUE	27.2727	6	40	6	High	High	High	High	Phospho [S215(100); S226(100); S364(99.6)]	139.7
High	ENSP00000334983.5	pep chromosome:GRCh38:15:72199029:72231190:-1 gene:ENSG00000067225.18 transcript:ENST00000335181.10 gene_biotype:protein_coding transcript_biotype:protein_coding gene_symbol:PKM description:pyruvate kinase M1/2 [Source:HGNC Symbol;Acc:HGNC:9021]	FALSE	TRUE	49.1525	23	33	22	High	High	High	High	Phospho [S37(100)]	88.26
High	ENSP00000297785.3	pep chromosome:GRCh38:9:72900671:72953053:-1 gene:ENSG00000165092.13 transcript:ENST00000297785.8 gene_biotype:protein_coding transcript_biotype:protein_coding gene_symbol:ALDH1A1 description:aldehyde dehydrogenase 1 family member A1 [Source:HGNC Symbol;Acc:HGNC:402]	FALSE	TRUE	51.497	24	33	24	High	High	High	High	Phospho [T267(100); T337(95.2); S413(100)]; Met-loss+Acetyl [N-Term]	83.4
High	ENSP00000218364.4	pep chromosome:GRCh38:X:136497592:136512346:1 gene:ENSG00000102241.12 transcript:ENST00000218364.5 gene_biotype:protein_coding transcript_biotype:protein_coding gene_symbol:HTATSF1 description:HIV-1 Tat specific factor 1 [Source:HGNC Symbol;Acc:HGNC:5276]	FALSE	TRUE	30.9934	24	56	24	High	High	High	High	Phospho [S387(90.5); S453(91.5); S498(100); S529(100); S548(100); S579(100); S607(100); S624(100); Y650(98.6); S676(100); S702(100); S721(100)]	115.57
High	ENSP00000263274.6	pep chromosome:GRCh38:19:48115445:48170344:-1 gene:ENSG00000105486.14 transcript:ENST00000263274.12 gene_biotype:protein_coding transcript_biotype:protein_coding gene_symbol:LIG1 description:DNA ligase 1 [Source:HGNC Symbol;Acc:HGNC:6598]	FALSE	TRUE	12.5136	10	46	10	High	High	High	High	Phospho [S51(100); S66(100); S141(100); T183(99.3); S913(100)]	144.34
High	ENSP00000386458.2	pep chromosome:GRCh38:2:152651593:152717981:-1 gene:ENSG00000196504.16 transcript:ENST00000410080.6 gene_biotype:protein_coding transcript_biotype:protein_coding gene_symbol:PRPF40A description:pre-mRNA processing factor 40 homolog A [Source:HGNC Symbol;Acc:HGNC:16463]	FALSE	TRUE	9.35614	13	56	13	High	High	High	High	Phospho [T410(99.7); S871(94.3); S925(100); S940(100); S949(95.6); S975(100)]	105.09
High	ENSP00000357189.5	pep chromosome:GRCh38:1:156743345:156752448:-1 gene:ENSG00000143321.19 transcript:ENST00000368206.5 gene_biotype:protein_coding transcript_biotype:protein_coding gene_symbol:HDGF description:heparin binding growth factor [Source:HGNC Symbol;Acc:HGNC:4856]	FALSE	TRUE	30.0781	12	46	12	High	High	High	High	Phospho [S148(100); S149(100); S181(100); S255(99.9)]	96.03
High	ENSP00000346032.3	pep chromosome:GRCh38:15:60347332:60397985:-1 gene:ENSG00000182718.16 transcript:ENST00000332680.8 gene_biotype:protein_coding transcript_biotype:protein_coding gene_symbol:ANXA2 description:annexin A2 [Source:HGNC Symbol;Acc:HGNC:537]	FALSE	TRUE	43.6975	15	29	15	High	High	High	High	Phospho [T37(100); S145(92.4); S202(100); Y334(98.9); T341(98.9)]	85.32
High	ENSP00000416951.2	pep chromosome:GRCh38:16:88570403:88631398:1 gene:ENSG00000158545.15 transcript:ENST00000452588.6 gene_biotype:protein_coding transcript_biotype:protein_coding gene_symbol:ZC3H18 description:zinc finger CCCH-type containing 18 [Source:HGNC Symbol;Acc:HGNC:25091]	FALSE	TRUE	22.1085	20	57	20	High	High	High	High	Phospho [S34(99.2); S46(99.9); S67(100); S83(100); S110(89.2); T162(100); S591(85.2); S594(98.2); S637(99); S798(98.7); S866(100); T875(93.4); S917(99.6)]	101.13
High	ENSP00000262710.1	pep chromosome:GRCh38:14:23058567:23095614:-1 gene:ENSG00000100813.14 transcript:ENST00000262710.5 gene_biotype:protein_coding transcript_biotype:protein_coding gene_symbol:ACIN1 description:apoptotic chromatin condensation inducer 1 [Source:HGNC Symbol;Acc:HGNC:17066]	FALSE	TRUE	15.0634	20	52	20	High	High	High	High	Phospho [S216(100); T254(99.6); S365(99.5); S386(98.7); S388(100); T414(100); S478(99.6); S490(100); S499(99.1); S598(100); S599(99.8); S601(98.2); S655(91.2); S710(100); S729(100); S838(100); S1004(97.7)]	96.15
High	P12763	Alpha-2-HS-glycoprotein OS=Bos taurus GN=AHSG PE=1 SV=2	TRUE	FALSE	29.2479	10	138	10	High	High	High	High	Phospho [S138(100)]	255.38
High	ENSP00000480987.1	pep chromosome:GRCh38:6:52264014:52284881:-1 gene:ENSG00000112118.20 transcript:ENST00000616552.4 gene_biotype:protein_coding transcript_biotype:protein_coding gene_symbol:MCM3 description:minichromosome maintenance complex component 3 [Source:HGNC Symbol;Acc:HGNC:6945]	FALSE	TRUE	8.67526	9	47	9	High	High	High	High	Phospho [S717(94); T767(100); S773(100)]	138.36
High	ENSP00000411532.1	pep chromosome:GRCh38:17:40388525:40417896:-1 gene:ENSG00000131747.15 transcript:ENST00000423485.6 gene_biotype:protein_coding transcript_biotype:protein_coding gene_symbol:TOP2A description:DNA topoisomerase II alpha [Source:HGNC Symbol;Acc:HGNC:11989]	FALSE	TRUE	10.9079	14	54	14	High	High	High	High	Phospho [S1106(100); S1213(100); S1247(100); S1295(98); S1297(98); S1303(85.8); S1354(100); S1374(95.5); T1397(82.8); S1469(99.8); S1471(99.8); S1474(99.8); S1525(100)]	131.53
High	ENSP00000388806.3	pep chromosome:GRCh38:12:53006456:53040280:1 gene:ENSG00000063046.17 transcript:ENST00000420463.7 gene_biotype:protein_coding transcript_biotype:protein_coding gene_symbol:EIF4B description:eukaryotic translation initiation factor 4B [Source:HGNC Symbol;Acc:HGNC:3285]	FALSE	TRUE	20.6169	11	69	11	High	High	High	High	Phospho [S93(93.9); S409(100); S422(85); S577(100)]	144.53
High	ENSP00000452276.1	pep chromosome:GRCh38:14:21210937:21269425:-1 gene:ENSG00000092199.17 transcript:ENST00000557201.5 gene_biotype:protein_coding transcript_biotype:protein_coding gene_symbol:HNRNPC description:heterogeneous nuclear ribonucleoprotein C (C1/C2) [Source:HGNC Symbol;Acc:HGNC:5035]	FALSE	TRUE	27.1242	8	36	2	High	High	High	High	Phospho [S241(99.9); S260(100); S299(100)]	94.94
High	ENSP00000353769.2	pep chromosome:GRCh38:19:49642209:49658642:1 gene:ENSG00000126461.15 transcript:ENST00000360565.8 gene_biotype:protein_coding transcript_biotype:protein_coding gene_symbol:SCAF1 description:SR-related CTD associated factor 1 [Source:HGNC Symbol;Acc:HGNC:30403]	FALSE	TRUE	12.5	11	42	11	High	High	High	High	Phospho [S239(99.5); S498(99.5); S548(86.9); S612(100); S614(99.9); S725(100); S734(100); S738(100); S965(99.5); T976(95.4); T1001(82.8)]	75.75
High	ENSP00000352584.4	pep chromosome:GRCh38:7:134527567:134541412:1 gene:ENSG00000198074.10 transcript:ENST00000359579.5 gene_biotype:protein_coding transcript_biotype:protein_coding gene_symbol:AKR1B10 description:aldo-keto reductase family 1 member B10 [Source:HGNC Symbol;Acc:HGNC:382]	FALSE	TRUE	56.6456	15	27	15	High	High	High	High	Phospho [S23(100); S215(99.4)]	54.04
High	ENSP00000370114.4	pep chromosome:GRCh38:9:15464066:15510995:-1 gene:ENSG00000164985.15 transcript:ENST00000380738.8 gene_biotype:protein_coding transcript_biotype:protein_coding gene_symbol:PSIP1 description:PC4 and SFRS1 interacting protein 1 [Source:HGNC Symbol;Acc:HGNC:9527]	FALSE	TRUE	13.3962	9	48	9	High	High	High	High	Phospho [S106(99.4); S116(90.3); S129(99.9)]	121.64
High	ENSP00000344848.3	pep chromosome:GRCh38:8:143915147:143939590:-1 gene:ENSG00000178209.15 transcript:ENST00000345136.7 gene_biotype:protein_coding transcript_biotype:protein_coding gene_symbol:PLEC description:plectin [Source:HGNC Symbol;Acc:HGNC:9069]	FALSE	TRUE	3.05696	10	40	2	High	High	High	High	Phospho [S20(92.5); S583(100); S1298(100); S1584(100); T3893(100); S4245(100); S4249(99.2); S4489(100)]	93.67
High	ENSP00000279392.3	pep chromosome:GRCh38:16:29992330:29995617:-1 gene:ENSG00000149929.16 transcript:ENST00000279392.8 gene_biotype:protein_coding transcript_biotype:protein_coding gene_symbol:HIRIP3 description:HIRA interacting protein 3 [Source:HGNC Symbol;Acc:HGNC:4917]	FALSE	TRUE	26.259	14	49	14	High	High	High	High	Phospho [T84(100); S87(100); S98(97.7); S104(81.1); S142(100); S143(100); S159(96.2); S199(100); S227(99.8); S289(100); S291(100); S333(88); S370(100); S555(100)]	102.98
High	ENSP00000428589.1	pep chromosome:GRCh38:5:154755575:154804208:1 gene:ENSG00000155506.17 transcript:ENST00000518297.5 gene_biotype:protein_coding transcript_biotype:protein_coding gene_symbol:LARP1 description:La ribonucleoprotein domain family member 1 [Source:HGNC Symbol;Acc:HGNC:29531]	FALSE	TRUE	17.6687	12	38	2	High	High	High	High	Phospho [S90(100); S220(100); S228(100); S517(100); S521(100); S548(99.9); S627(99.2); S774(100)]	80.92
High	ENSP00000336721.4	pep chromosome:GRCh38:5:154712843:154817605:1 gene:ENSG00000155506.17 transcript:ENST00000336314.9 gene_biotype:protein_coding transcript_biotype:protein_coding gene_symbol:LARP1 description:La ribonucleoprotein domain family member 1 [Source:HGNC Symbol;Acc:HGNC:29531]	FALSE	TRUE	13.8371	12	44	2	High	High	High	High	Phospho [S143(100); S151(100); S440(100); S444(100); S471(99.9); S550(99.2); S697(100); S774(99.2)]	83.51
High	ENSP00000301785.5	pep chromosome:GRCh38:11:62712630:62727457:-1 gene:ENSG00000214753.4 transcript:ENST00000301785.7 gene_biotype:protein_coding transcript_biotype:protein_coding gene_symbol:HNRNPUL2 description:heterogeneous nuclear ribonucleoprotein U like 2 [Source:HGNC Symbol;Acc:HGNC:25451]	FALSE	TRUE	7.76439	7	43	7	High	High	High	High	Phospho [S161(100); S185(100); S228(99.4)]	83.09
High	ENSP00000257497.6	pep chromosome:GRCh38:9:73151865:73170393:1 gene:ENSG00000135046.14 transcript:ENST00000257497.11 gene_biotype:protein_coding transcript_biotype:protein_coding gene_symbol:ANXA1 description:annexin A1 [Source:HGNC Symbol;Acc:HGNC:533]	FALSE	TRUE	41.9075	11	20	11	High	High	High	High	Phospho [S37(98.6)]	64.42
High	ENSP00000216181.5	pep chromosome:GRCh38:22:36281277:36388067:-1 gene:ENSG00000100345.21 transcript:ENST00000216181.10 gene_biotype:protein_coding transcript_biotype:protein_coding gene_symbol:MYH9 description:myosin heavy chain 9 [Source:HGNC Symbol;Acc:HGNC:7579]	FALSE	TRUE	7.70408	12	45	10	High	High	High	High	Phospho [S1943(100)]	142.31
High	ENSP00000484535.2	pep chromosome:GRCh38:CHR_HSCHR15_4_CTG8:29850002:29972346:-1 gene:ENSG00000277401.4 transcript:ENST00000621049.4 gene_biotype:protein_coding transcript_biotype:protein_coding gene_symbol:TJP1 description:tight junction protein 1 [Source:HGNC Symbol;Acc:HGNC:11827]	FALSE	TRUE	13.6878	15	35	3	High	High	High	High	Phospho [S125(99); S166(100); S168(100); S179(98.7); S277(100); S297(100); S300(100); S313(100); S315(100); S617(100); Y843(76.1); S912(100); Y931(82); S968(99.8); S1617(99.5)]	59.6
High	ENSP00000322938.3	pep chromosome:GRCh38:8:143790920:143815379:-1 gene:ENSG00000180900.19 transcript:ENST00000320476.7 gene_biotype:protein_coding transcript_biotype:protein_coding gene_symbol:SCRIB description:scribble planar cell polarity protein [Source:HGNC Symbol;Acc:HGNC:30377]	FALSE	TRUE	14.5399	15	41	15	High	High	High	High	Phospho [S504(99.8); S668(100); S688(100); T689(100); S835(88.6); S1220(100); S1232(100); S1348(97.5); S1378(100); S1437(99); S1448(95.8); S1475(100); S1561(91.5)]	104.78
High	ENSP00000338095.6	pep chromosome:GRCh38:14:21209136:21269494:-1 gene:ENSG00000092199.17 transcript:ENST00000336053.10 gene_biotype:protein_coding transcript_biotype:protein_coding gene_symbol:HNRNPC description:heterogeneous nuclear ribonucleoprotein C (C1/C2) [Source:HGNC Symbol;Acc:HGNC:5035]	FALSE	TRUE	23.2639	7	36	1	High	High	High	High	Phospho [S228(99.9); S247(100)]	94.97
High	ENSP00000379281.3	pep chromosome:GRCh38:8:100920630:100950557:-1 gene:ENSG00000164924.18 transcript:ENST00000395951.7 gene_biotype:protein_coding transcript_biotype:protein_coding gene_symbol:YWHAZ description:tyrosine 3-monooxygenase/tryptophan 5-monooxygenase activation protein zeta [Source:HGNC Symbol;Acc:HGNC:12855]	FALSE	TRUE	48.1633	9	20	5	High	High	High	High	Phospho [S207(99.9); T232(99.1)]	81.97
High	ENSP00000340019.2	pep chromosome:GRCh38:2:197486586:197500274:-1 gene:ENSG00000144381.17 transcript:ENST00000345042.6 gene_biotype:protein_coding transcript_biotype:protein_coding gene_symbol:HSPD1 description:heat shock protein family D (Hsp60) member 1 [Source:HGNC Symbol;Acc:HGNC:5261]	FALSE	TRUE	25.4799	12	18	12	High	High	High	High	Phospho [S70(100)]	57.42
High	ENSP00000323856.4	pep chromosome:GRCh38:8:143915153:143950876:-1 gene:ENSG00000178209.15 transcript:ENST00000322810.8 gene_biotype:protein_coding transcript_biotype:protein_coding gene_symbol:PLEC description:plectin [Source:HGNC Symbol;Acc:HGNC:9069]	FALSE	TRUE	3.41588	10	36	2	High	High	High	High	Phospho [S125(100); S149(99.8); S720(100); S1435(100); S1721(100); T4030(100); S4382(100); S4386(99.2); S4613(90); S4622(99.6)]	88.03
High	ENSP00000264645.6	pep chromosome:GRCh38:17:40140537:40172171:1 gene:ENSG00000108349.17 transcript:ENST00000264645.12 gene_biotype:protein_coding transcript_biotype:protein_coding gene_symbol:CASC3 description:CASC3 exon junction complex subunit [Source:HGNC Symbol;Acc:HGNC:17040]	FALSE	TRUE	16.5007	8	28	8	High	High	High	High	Phospho [S28(100); S45(100); S47(100); S66(100); S125(93.3); S148(100)]	83.21
High	ENSP00000358866.3	pep chromosome:GRCh38:X:154348531:154374634:-1 gene:ENSG00000196924.17 transcript:ENST00000369850.10 gene_biotype:protein_coding transcript_biotype:protein_coding gene_symbol:FLNA description:filamin A [Source:HGNC Symbol;Acc:HGNC:3754]	FALSE	TRUE	7.97129	14	22	14	High	High	High	High	Phospho [S968(100); S1084(100); S1459(100); S1533(100); S1630(99); S2152(100); S2180(99.8); S2327(99.5); T2599(100)]	59.73
High	ENSP00000495843.2	pep chromosome:GRCh38:CHR_HG30_PATCH:179821758:179838931:1 gene:ENSG00000284099.3 transcript:ENST00000643389.2 gene_biotype:protein_coding transcript_biotype:protein_coding gene_symbol:AC008393.2 description:sequestosome 1 [Source:NCBI gene;Acc:8878]	FALSE	TRUE	36.3636	7	41	7	High	High	High	High	Phospho [S24(100); S207(100); T269(100); S332(87.1); S361(78.7)]	94.94
High	ENSP00000227520.5	pep chromosome:GRCh38:11:60842113:60851081:1 gene:ENSG00000110104.13 transcript:ENST00000227520.10 gene_biotype:protein_coding transcript_biotype:protein_coding gene_symbol:CCDC86 description:coiled-coil domain containing 86 [Source:HGNC Symbol;Acc:HGNC:28359]	FALSE	TRUE	31.3889	10	32	10	High	High	High	High	Phospho [S18(84.1); S47(99.8); S58(100); S69(100); S91(100); S102(100)]	77.76
High	ENSP00000262854.6	pep chromosome:GRCh38:X:53532096:53686719:-1 gene:ENSG00000086758.16 transcript:ENST00000262854.11 gene_biotype:protein_coding transcript_biotype:protein_coding gene_symbol:HUWE1 description:HECT, UBA and WWE domain containing E3 ubiquitin protein ligase 1 [Source:HGNC Symbol;Acc:HGNC:30892]	FALSE	TRUE	4.45816	10	45	10	High	High	High	High	Phospho [S649(90.2); S1395(100); T1722(100); S1907(100); S2052(100); S2362(99.3); T2889(83.6); S2918(99); S3818(84.3); S3919(99.1)]	91.25
High	ENSP00000362638.4	pep chromosome:GRCh38:1:32333839:32336233:-1 gene:ENSG00000175130.7 transcript:ENST00000329421.8 gene_biotype:protein_coding transcript_biotype:protein_coding gene_symbol:MARCKSL1 description:MARCKS like 1 [Source:HGNC Symbol;Acc:HGNC:7142]	FALSE	TRUE	60	6	29	6	High	High	High	High	Phospho [S22(100); T85(100); S104(100); S135(98.4); T148(100)]	91.88
High	ENSP00000341483.5	pep chromosome:GRCh38:19:5916139:5978140:-1 gene:ENSG00000031823.14 transcript:ENST00000340578.10 gene_biotype:protein_coding transcript_biotype:protein_coding gene_symbol:RANBP3 description:RAN binding protein 3 [Source:HGNC Symbol;Acc:HGNC:9850]	FALSE	TRUE	21.3404	7	38	6	High	High	High	High	Phospho [S100(100); S101(100); S244(100); S333(100); S359(87.8); S539(77.7)]	104.29
High	ENSP00000308227.4	pep chromosome:GRCh38:6:34236873:34246231:1 gene:ENSG00000137309.19 transcript:ENST00000311487.9 gene_biotype:protein_coding transcript_biotype:protein_coding gene_symbol:HMGA1 description:high mobility group AT-hook 1 [Source:HGNC Symbol;Acc:HGNC:5010]	FALSE	TRUE	48.5981	6	43	1	High	High	High	High	Phospho [S9(99.2); S102(93.9)]	102.73
High	ENSP00000384018.1	pep chromosome:GRCh38:12:124324415:124495252:-1 gene:ENSG00000196498.13 transcript:ENST00000405201.5 gene_biotype:protein_coding transcript_biotype:protein_coding gene_symbol:NCOR2 description:nuclear receptor corepressor 2 [Source:HGNC Symbol;Acc:HGNC:7673]	FALSE	TRUE	9.50676	16	24	16	High	High	High	High	Phospho [S215(100); T553(100); S554(100); S746(99.8); S750(99.2); S753(91.4); S922(100); S956(100); S1025(100); S1251(99.9); T1383(100); S1971(99.9); S2194(100); S2203(100); S2223(100)]	66.4
High	ENSP00000354730.1	pep chromosome:GRCh38:13:114314503:114327322:1 gene:ENSG00000198824.7 transcript:ENST00000361283.4 gene_biotype:protein_coding transcript_biotype:protein_coding gene_symbol:CHAMP1 description:chromosome alignment maintaining phosphoprotein 1 [Source:HGNC Symbol;Acc:HGNC:20311]	FALSE	TRUE	21.6749	15	36	15	High	High	High	High	Phospho [S108(100); S204(100); S282(93.3); S416(100); S427(100); S436(100); S459(99.7); S476(100); S505(99.8); S542(100); S603(100)]	56.58
High	ENSP00000263847.1	pep chromosome:GRCh38:11:59574398:59615774:-1 gene:ENSG00000110048.12 transcript:ENST00000263847.6 gene_biotype:protein_coding transcript_biotype:protein_coding gene_symbol:OSBP description:oxysterol binding protein [Source:HGNC Symbol;Acc:HGNC:8503]	FALSE	TRUE	15.9851	5	23	5	High	High	High	High	Phospho [S351(100); S379(87.3)]	66.1
High	ENSP00000478061.1	pep chromosome:GRCh38:6:113857345:113863475:1 gene:ENSG00000277443.3 transcript:ENST00000612661.2 gene_biotype:protein_coding transcript_biotype:protein_coding gene_symbol:MARCKS description:myristoylated alanine rich protein kinase C substrate [Source:HGNC Symbol;Acc:HGNC:6759]	FALSE	TRUE	37.9518	9	43	9	High	High	High	High	Phospho [S27(93); S81(75.3); S101(100); S118(84.9); T150(100); S167(89.9)]	93.92
High	ENSP00000449404.1	pep chromosome:GRCh38:12:52897297:52926469:-1 gene:ENSG00000170421.12 transcript:ENST00000552150.5 gene_biotype:protein_coding transcript_biotype:protein_coding gene_symbol:KRT8 description:keratin 8 [Source:HGNC Symbol;Acc:HGNC:6446]	TRUE	TRUE	38.3562	16	29	14	High	High	High	High	Phospho [S52(91.6); S286(96.7); S302(100); S358(100); S460(85)]	64.17
High	ENSP00000222968.4	pep chromosome:GRCh38:7:99394673:99408597:-1 gene:ENSG00000106244.13 transcript:ENST00000350498.8 gene_biotype:protein_coding transcript_biotype:protein_coding gene_symbol:PDAP1 description:PDGFA associated protein 1 [Source:HGNC Symbol;Acc:HGNC:14634]	FALSE	TRUE	11.6022	4	41	4	High	High	High	High	Phospho [S63(100)]	137.79
High	ENSP00000313851.10	pep chromosome:GRCh38:13:32586452:32778019:1 gene:ENSG00000083642.19 transcript:ENST00000315596.15 gene_biotype:protein_coding transcript_biotype:protein_coding gene_symbol:PDS5B description:PDS5 cohesin associated factor B [Source:HGNC Symbol;Acc:HGNC:20418]	FALSE	TRUE	7.18728	8	26	8	High	High	High	High	Phospho [S1162(100); S1166(100); S1182(96.4); T1220(100); S1283(100); S1358(94.5)]	56.14
High	ENSP00000225298.7	pep chromosome:GRCh38:17:51260546:51297933:1 gene:ENSG00000011260.14 transcript:ENST00000225298.12 gene_biotype:protein_coding transcript_biotype:protein_coding gene_symbol:UTP18 description:UTP18 small subunit processome component [Source:HGNC Symbol;Acc:HGNC:24274]	FALSE	TRUE	6.47482	4	36	4	High	High	High	High	Phospho [S121(100)]	92.15
High	ENSP00000483345.1	pep chromosome:GRCh38:19:4472297:4502207:1 gene:ENSG00000167674.15 transcript:ENST00000616600.5 gene_biotype:protein_coding transcript_biotype:protein_coding gene_symbol:HDGFL2 description:HDGF like 2 [Source:HGNC Symbol;Acc:HGNC:14680]	FALSE	TRUE	17.2876	11	32	11	High	High	High	High	Phospho [S257(96.7); S264(86.4); S366(100); S369(100); S370(100); S395(89.8); S454(99.9); S625(100); S652(100); S664(100)]	68.33
High	ENSP00000288245.9	pep chromosome:GRCh38:6:34236873:34246231:1 gene:ENSG00000137309.19 transcript:ENST00000347617.10 gene_biotype:protein_coding transcript_biotype:protein_coding gene_symbol:HMGA1 description:high mobility group AT-hook 1 [Source:HGNC Symbol;Acc:HGNC:5010]	FALSE	TRUE	42.7083	6	41	1	High	High	High	High	Phospho [S9(99.2); T42(100); S91(96.3)]	102.73
High	ENSP00000264555.5	pep chromosome:GRCh38:11:576470:612222:1 gene:ENSG00000070047.12 transcript:ENST00000264555.10 gene_biotype:protein_coding transcript_biotype:protein_coding gene_symbol:PHRF1 description:PHD and ring finger domains 1 [Source:HGNC Symbol;Acc:HGNC:24351]	FALSE	TRUE	11.886	12	30	11	High	High	High	High	Phospho [S814(100); S846(99.3); S867(100); S915(98.6); S936(100); S973(100); S1202(100); S1229(100); S1371(99.9)]	63.6
High	ENSP00000336687.4	pep chromosome:GRCh38:7:26201162:26213356:1 gene:ENSG00000122565.19 transcript:ENST00000337620.8 gene_biotype:protein_coding transcript_biotype:protein_coding gene_symbol:CBX3 description:chromobox 3 [Source:HGNC Symbol;Acc:HGNC:1553]	FALSE	TRUE	14.7541	5	47	5	High	High	High	High	Phospho [S93(100); S176(100)]	114.18
High	ENSP00000358633.2	pep chromosome:GRCh38:X:154532000:154547572:-1 gene:ENSG00000160211.19 transcript:ENST00000369620.6 gene_biotype:protein_coding transcript_biotype:protein_coding gene_symbol:G6PD description:glucose-6-phosphate dehydrogenase [Source:HGNC Symbol;Acc:HGNC:4057]	FALSE	TRUE	31.7291	16	18	16	High	High	High	High	Phospho [Y447(100)]	49.88
High	ENSP00000316891.7	pep chromosome:GRCh38:4:41360787:41700044:1 gene:ENSG00000064042.18 transcript:ENST00000313860.11 gene_biotype:protein_coding transcript_biotype:protein_coding gene_symbol:LIMCH1 description:LIM and calponin homology domains 1 [Source:HGNC Symbol;Acc:HGNC:29191]	FALSE	TRUE	10.711	13	37	12	High	High	High	High	Phospho [S169(100); S192(95.3); S207(99.9); S217(100); S231(100); S718(100); S973(100)]	78.14
High	ENSP00000242848.4	pep chromosome:GRCh38:13:45954465:46052746:-1 gene:ENSG00000123200.16 transcript:ENST00000242848.8 gene_biotype:protein_coding transcript_biotype:protein_coding gene_symbol:ZC3H13 description:zinc finger CCCH-type containing 13 [Source:HGNC Symbol;Acc:HGNC:20368]	FALSE	TRUE	10.5516	17	37	17	High	High	High	High	Phospho [T15(83.6); S64(100); T82(99.3); S198(100); S325(100); T364(99.9); S642(93.7); S853(100); S993(100); S1010(100); S1190(83.8)]	67.56
High	ENSP00000407720.2	pep chromosome:GRCh38:17:39461761:39532477:1 gene:ENSG00000167258.14 transcript:ENST00000430627.6 gene_biotype:protein_coding transcript_biotype:protein_coding gene_symbol:CDK12 description:cyclin dependent kinase 12 [Source:HGNC Symbol;Acc:HGNC:24224]	FALSE	TRUE	9.18298	13	31	1	High	High	High	High	Phospho [S215(100); S228(99.2); S249(95.5); S303(100); S325(94.9); S334(94.8); S383(99.6); S385(100); S423(100); S685(100); T692(100); S1082(99.5); T1244(100)]	70.71
High	ENSP00000443475.1	pep chromosome:GRCh38:12:49227926:49273334:1 gene:ENSG00000167553.15 transcript:ENST00000541364.5 gene_biotype:protein_coding transcript_biotype:protein_coding gene_symbol:TUBA1C description:tubulin alpha 1c [Source:HGNC Symbol;Acc:HGNC:20768]	FALSE	TRUE	21.7726	9	17	1	High	High	High	High	Phospho [S509(100)]	63.67
High	ENSP00000311513.6	pep chromosome:GRCh38:11:77659996:77821017:-1 gene:ENSG00000048649.13 transcript:ENST00000308488.10 gene_biotype:protein_coding transcript_biotype:protein_coding gene_symbol:RSF1 description:remodeling and spacing factor 1 [Source:HGNC Symbol;Acc:HGNC:18118]	FALSE	TRUE	11.1034	15	23	15	High	High	High	High	Phospho [S570(100); S604(100); S622(86.2); S748(100); S865(98.3); S1226(100); S1245(97.2); S1277(84.2); T1305(100); S1345(98.7)]	50.64
High	ENSP00000354718.2	pep chromosome:GRCh38:15:85380729:85745610:1 gene:ENSG00000170776.21 transcript:ENST00000361243.6 gene_biotype:protein_coding transcript_biotype:protein_coding gene_symbol:AKAP13 description:A-kinase anchoring protein 13 [Source:HGNC Symbol;Acc:HGNC:371]	FALSE	TRUE	6.49627	12	22	12	High	High	High	High	Phospho [T1149(100); S1565(100); S1604(88); S1651(100); S1880(100); S1933(93.7); S2402(99.3); S2406(99.3); S2502(99.7); S2732(100)]	50.27
High	ENSP00000367044.1	pep chromosome:GRCh38:20:17613679:17682242:-1 gene:ENSG00000125844.16 transcript:ENST00000377813.6 gene_biotype:protein_coding transcript_biotype:protein_coding gene_symbol:RRBP1 description:ribosome binding protein 1 [Source:HGNC Symbol;Acc:HGNC:10448]	FALSE	TRUE	21.2057	18	34	18	High	High	High	High	Phospho [S135(95.3); T235(100); S533(100); S573(95.6); S583(100); S615(100); T715(100); T715(100); T717(100); T717(100); T717(100); T717(100); S1115(100)]	54.82
High	ENSP00000414892.2	pep chromosome:GRCh38:12:56664167:56688284:-1 gene:ENSG00000110958.16 transcript:ENST00000448157.6 gene_biotype:protein_coding transcript_biotype:protein_coding gene_symbol:PTGES3 description:prostaglandin E synthase 3 [Source:HGNC Symbol;Acc:HGNC:16049]	FALSE	TRUE	23.0216	3	49	2	High	High	High	High	Phospho [S113(100); S130(100)]	188.8
High	ENSP00000398880.3	pep chromosome:GRCh38:17:39461486:39534544:1 gene:ENSG00000167258.14 transcript:ENST00000447079.5 gene_biotype:protein_coding transcript_biotype:protein_coding gene_symbol:CDK12 description:cyclin dependent kinase 12 [Source:HGNC Symbol;Acc:HGNC:24224]	FALSE	TRUE	9.73154	13	30	1	High	High	High	High	Phospho [S215(100); S228(99.2); S249(95.5); S303(100); S325(94.9); S334(94.8); S383(99.6); S385(100); S423(100); S685(100); T692(100); S1082(99.5); T1244(99.9)]	68.84
High	ENSP00000391481.1	pep chromosome:GRCh38:3:53225657:53256022:-1 gene:ENSG00000163931.16 transcript:ENST00000423516.5 gene_biotype:protein_coding transcript_biotype:protein_coding gene_symbol:TKT description:transketolase [Source:HGNC Symbol;Acc:HGNC:11834]	FALSE	TRUE	25.832	11	14	11	High	High	High	High	Phospho [T295(100)]	40.55
High	ENSP00000349571.4	pep chromosome:GRCh38:13:75620434:75859868:1 gene:ENSG00000136153.20 transcript:ENST00000357063.7 gene_biotype:protein_coding transcript_biotype:protein_coding gene_symbol:LMO7 description:LIM domain 7 [Source:HGNC Symbol;Acc:HGNC:6646]	FALSE	TRUE	9.29257	10	33	10	High	High	High	High	Phospho [S689(99.7); S852(90.2); S973(99.3); T1033(100); S1114(100); S1408(99.6)]	56.53
High	ENSP00000387365.3	pep chromosome:GRCh38:12:107685799:107713162:1 gene:ENSG00000136045.12 transcript:ENST00000412830.8 gene_biotype:protein_coding transcript_biotype:protein_coding gene_symbol:PWP1 description:PWP1 homolog, endonuclein [Source:HGNC Symbol;Acc:HGNC:17015]	FALSE	TRUE	5.38922	2	22	2	High	High	High	High	Phospho [S50(100)]	90.56
High	ENSP00000328848.8	pep chromosome:GRCh38:X:47145447:47186812:1 gene:ENSG00000182872.16 transcript:ENST00000329236.8 gene_biotype:protein_coding transcript_biotype:protein_coding gene_symbol:RBM10 description:RNA binding motif protein 10 [Source:HGNC Symbol;Acc:HGNC:9896]	FALSE	TRUE	9.84925	7	39	7	High	High	High	High	Phospho [S30(100); S57(93.6); S138(98.9); T156(93.5); S788(100); S803(100); S862(100)]	103.58
High	ENSP00000414373.2	pep chromosome:GRCh38:CHR_HSCHR6_MHC_MANN_CTG1:30616012:30636067:1 gene:ENSG00000231129.8 transcript:ENST00000426219.6 gene_biotype:protein_coding transcript_biotype:protein_coding gene_symbol:ABCF1 description:ATP binding cassette subfamily F member 1 [Source:HGNC Symbol;Acc:HGNC:70]	FALSE	TRUE	7.33728	5	22	5	High	High	High	High	Phospho [S22(99.8); T108(99.5); S228(100)]	68
High	ENSP00000357643.3	pep chromosome:GRCh38:10:128096659:128126423:-1 gene:ENSG00000148773.14 transcript:ENST00000368654.8 gene_biotype:protein_coding transcript_biotype:protein_coding gene_symbol:MKI67 description:marker of proliferation Ki-67 [Source:HGNC Symbol;Acc:HGNC:7107]	FALSE	TRUE	6.14251	13	30	13	High	High	High	High	Phospho [S127(99.8); S308(100); S357(100); S584(99.9); T861(85.6); T1335(100); S1376(91.9); S1861(100); S2223(100); S2588(99.8); S2708(100); S2828(92.2)]	58.25
High	ENSP00000346120.4	pep chromosome:GRCh38:10:68956170:68985068:1 gene:ENSG00000165732.13 transcript:ENST00000354185.9 gene_biotype:protein_coding transcript_biotype:protein_coding gene_symbol:DDX21 description:DExD-box helicase 21 [Source:HGNC Symbol;Acc:HGNC:2744]	FALSE	TRUE	5.61941	6	23	6	High	High	High	High	Phospho [S71(100); S89(100); S121(100)]	48.56
High	ENSP00000358563.5	pep chromosome:GRCh38:X:154762864:154777689:1 gene:ENSG00000130826.18 transcript:ENST00000369550.10 gene_biotype:protein_coding transcript_biotype:protein_coding gene_symbol:DKC1 description:dyskerin pseudouridine synthase 1 [Source:HGNC Symbol;Acc:HGNC:2890]	FALSE	TRUE	13.6187	7	30	7	High	High	High	High	Phospho [S21(100); S494(87.4); S513(100)]	76.73
High	ENSP00000434070.1	pep chromosome:GRCh38:8:143579728:143590460:-1 gene:ENSG00000104529.17 transcript:ENST00000532741.5 gene_biotype:protein_coding transcript_biotype:protein_coding gene_symbol:EEF1D description:eukaryotic translation elongation factor 1 delta [Source:HGNC Symbol;Acc:HGNC:3211]	FALSE	TRUE	7.74749	4	33	4	High	High	High	High	Phospho [S535(96.6); S549(100); S578(100)]	114.16
High	ENSP00000365016.3	pep chromosome:GRCh38:13:109752695:109786583:-1 gene:ENSG00000185950.9 transcript:ENST00000375856.5 gene_biotype:protein_coding transcript_biotype:protein_coding gene_symbol:IRS2 description:insulin receptor substrate 2 [Source:HGNC Symbol;Acc:HGNC:6126]	FALSE	TRUE	8.74439	9	30	9	High	High	High	High	Phospho [S560(100); S620(92.6); S915(99.7); S973(90.4); T1102(88)]	70.18
High	ENSP00000322419.4	pep chromosome:GRCh38:11:809967:812876:1 gene:ENSG00000177600.9 transcript:ENST00000321153.9 gene_biotype:protein_coding transcript_biotype:protein_coding gene_symbol:RPLP2 description:ribosomal protein lateral stalk subunit P2 [Source:HGNC Symbol;Acc:HGNC:10377]	FALSE	TRUE	36.5217	4	61	4	High	High	High	High	Phospho [S102(100)]	110.89
High	ENSP00000433547.1	pep chromosome:GRCh38:6:4021267:4064982:1 gene:ENSG00000112739.17 transcript:ENST00000480058.5 gene_biotype:protein_coding transcript_biotype:nonsense_mediated_decay gene_symbol:PRPF4B description:pre-mRNA processing factor 4B [Source:HGNC Symbol;Acc:HGNC:17346]	FALSE	TRUE	15.4916	16	36	15	High	High	High	High	Phospho [S20(100); S32(100); Y140(89.3); S230(99.7); S257(99.6); S277(99.9); S292(100); S294(100); S366(100); S368(100); S427(100); S431(100); S578(100); Y849(99.9); S921(100); S921(100); S923(100); S923(100)]	51.56
High	ENSP00000217971.7	pep chromosome:GRCh38:X:119236285:119244466:1 gene:ENSG00000101856.10 transcript:ENST00000217971.8 gene_biotype:protein_coding transcript_biotype:protein_coding gene_symbol:PGRMC1 description:progesterone receptor membrane component 1 [Source:HGNC Symbol;Acc:HGNC:16090]	FALSE	TRUE	20.5128	3	44	3	High	High	High	High	Phospho [S57(99.7); S181(84.4)]	110.84
High	ENSP00000423427.2	pep chromosome:GRCh38:6:18224346:18264524:-1 gene:ENSG00000124795.17 transcript:ENST00000507591.2 gene_biotype:protein_coding transcript_biotype:protein_coding gene_symbol:DEK description:DEK proto-oncogene [Source:HGNC Symbol;Acc:HGNC:2768]	FALSE	TRUE	16.8421	7	28	7	High	High	High	High	Phospho [S32(100); S243(100); S244(100); S251(100); S306(100); S307(100)]	86.06
High	ENSP00000378917.2	pep chromosome:GRCh38:16:28823093:28837237:1 gene:ENSG00000168488.18 transcript:ENST00000395547.6 gene_biotype:protein_coding transcript_biotype:protein_coding gene_symbol:ATXN2L description:ataxin 2 like [Source:HGNC Symbol;Acc:HGNC:31326]	FALSE	TRUE	13.5825	10	28	10	High	High	High	High	Phospho [S111(100); S339(98); S391(99.4); S449(100); S496(97.2); S594(100)]	49.59
High	ENSP00000386591.1	pep chromosome:GRCh38:2:171687708:171748011:1 gene:ENSG00000077380.15 transcript:ENST00000409317.5 gene_biotype:protein_coding transcript_biotype:protein_coding gene_symbol:DYNC1I2 description:dynein cytoplasmic 1 intermediate chain 2 [Source:HGNC Symbol;Acc:HGNC:2964]	FALSE	TRUE	7.59494	2	22	2	High	High	High	High	Phospho [S83(87.6); T89(87.9)]	45.17
High	ENSP00000378517.3	pep chromosome:GRCh38:4:87975714:87983411:1 gene:ENSG00000118785.14 transcript:ENST00000395080.8 gene_biotype:protein_coding transcript_biotype:protein_coding gene_symbol:SPP1 description:secreted phosphoprotein 1 [Source:HGNC Symbol;Acc:HGNC:11255]	FALSE	TRUE	26.4331	8	24	8	High	High	High	High	Phospho [S26(95.1); S219(100); S234(100); S303(100)]	57.06
High	ENSP00000264331.4	pep chromosome:GRCh38:3:25597905:25664372:-1 gene:ENSG00000077097.15 transcript:ENST00000264331.8 gene_biotype:protein_coding transcript_biotype:protein_coding gene_symbol:TOP2B description:DNA topoisomerase II beta [Source:HGNC Symbol;Acc:HGNC:11990]	FALSE	TRUE	8.48708	9	23	9	High	High	High	High	Phospho [S1336(88.5); S1424(97.6); S1466(100); S1524(93.1); S1552(99.6); S1581(83.6)]	57.73
High	ENSP00000482066.1	pep chromosome:GRCh38:5:17216823:17276843:1 gene:ENSG00000176788.9 transcript:ENST00000616743.1 gene_biotype:protein_coding transcript_biotype:protein_coding gene_symbol:BASP1 description:brain abundant membrane attached signal protein 1 [Source:HGNC Symbol;Acc:HGNC:957]	FALSE	TRUE	46.2555	8	24	8	High	High	High	High	Phospho [T36(100); S176(89.3); T196(99.9)]	56.69
High	ENSP00000416111.1	pep chromosome:GRCh38:8:22054817:22082524:1 gene:ENSG00000158856.18 transcript:ENST00000432128.5 gene_biotype:protein_coding transcript_biotype:protein_coding gene_symbol:DMTN description:dematin actin binding protein [Source:HGNC Symbol;Acc:HGNC:3382]	FALSE	TRUE	18.0247	7	23	7	High	High	High	High	Phospho [S18(85.9); S85(100); S87(100); S90(83.3); S156(100); S226(100); S289(93)]	62.38
High	ENSP00000278412.2	pep chromosome:GRCh38:11:57325988:57335892:-1 gene:ENSG00000149136.9 transcript:ENST00000278412.7 gene_biotype:protein_coding transcript_biotype:protein_coding gene_symbol:SSRP1 description:structure specific recognition protein 1 [Source:HGNC Symbol;Acc:HGNC:11327]	FALSE	TRUE	9.44993	4	53	4	High	High	High	High	Phospho [S444(100); S672(99.2); S685(100); S688(100)]	160.94
High	ENSP00000378953.1	pep chromosome:GRCh38:16:28711417:28735727:1 gene:ENSG00000184110.14 transcript:ENST00000395587.5 gene_biotype:protein_coding transcript_biotype:protein_coding gene_symbol:EIF3C description:eukaryotic translation initiation factor 3 subunit C [Source:HGNC Symbol;Acc:HGNC:3279]	FALSE	TRUE	11.8291	8	32	8	High	High	High	High	Phospho [S18(89.6); S39(100); T263(94.9)]	66.34
High	ENSP00000306330.3	pep chromosome:GRCh38:7:76326799:76358991:-1 gene:ENSG00000170027.7 transcript:ENST00000307630.5 gene_biotype:protein_coding transcript_biotype:protein_coding gene_symbol:YWHAG description:tyrosine 3-monooxygenase/tryptophan 5-monooxygenase activation protein gamma [Source:HGNC Symbol;Acc:HGNC:12852]	FALSE	TRUE	41.2955	9	25	5	High	High	High	High	Phospho [S71(94.1); S235(98.6)]	100.53
High	ENSP00000366396.3	pep chromosome:GRCh38:20:21303331:21389825:1 gene:ENSG00000088930.8 transcript:ENST00000377191.5 gene_biotype:protein_coding transcript_biotype:protein_coding gene_symbol:XRN2 description:5'-3' exoribonuclease 2 [Source:HGNC Symbol;Acc:HGNC:12836]	FALSE	TRUE	6	5	24	5	High	High	High	High	Phospho [S448(99.8); S475(83.1); S499(99.6)]	72.98
High	ENSP00000327077.8	pep chromosome:GRCh38:8:17922840:18027968:1 gene:ENSG00000078674.17 transcript:ENST00000325083.12 gene_biotype:protein_coding transcript_biotype:protein_coding gene_symbol:PCM1 description:pericentriolar material 1 [Source:HGNC Symbol;Acc:HGNC:8727]	FALSE	TRUE	6.52174	8	26	8	High	High	High	High	Phospho [S65(100); S430(80.4); S537(100); S580(100); S861(100); S872(100); S1335(100); S1730(100)]	50.34
High	ENSP00000222345.4	pep chromosome:GRCh38:19:37907208:38208369:1 gene:ENSG00000105738.11 transcript:ENST00000222345.11 gene_biotype:protein_coding transcript_biotype:protein_coding gene_symbol:SIPA1L3 description:signal induced proliferation associated 1 like 3 [Source:HGNC Symbol;Acc:HGNC:23801]	FALSE	TRUE	6.96238	9	30	9	High	High	High	High	Phospho [S100(99.5); S146(100); S317(100); S1254(100); S1364(100); S1534(100); S1544(100)]	60.58
High	ENSP00000263991.5	pep chromosome:GRCh38:2:62705866:63046487:1 gene:ENSG00000115504.14 transcript:ENST00000263991.9 gene_biotype:protein_coding transcript_biotype:protein_coding gene_symbol:EHBP1 description:EH domain binding protein 1 [Source:HGNC Symbol;Acc:HGNC:29144]	FALSE	TRUE	12.2665	11	30	11	High	High	High	High	Phospho [T378(95.6); S426(82.6); S649(92.2); S710(100); S751(99.9); S759(99.6); S787(98.9); S1035(100); S1058(100)]	50.16
High	ENSP00000482697.1	pep chromosome:GRCh38:CHR_HSCHR15_4_CTG8:29850002:29971379:-1 gene:ENSG00000277401.4 transcript:ENST00000612628.3 gene_biotype:protein_coding transcript_biotype:protein_coding gene_symbol:TJP1 description:tight junction protein 1 [Source:HGNC Symbol;Acc:HGNC:11827]	FALSE	TRUE	11.2884	13	30	1	Medium	Medium	Medium	Medium	Phospho [S129(99); S170(100); S172(100); S183(98.7); S281(100); S301(100); S304(100); S317(100); S319(100); S621(100); Y847(76.1); S916(89.2); S1541(99.5)]	42.29
High	ENSP00000432083.1	pep chromosome:GRCh38:11:123057489:123062136:-1 gene:ENSG00000109971.14 transcript:ENST00000534624.6 gene_biotype:protein_coding transcript_biotype:protein_coding gene_symbol:HSPA8 description:heat shock protein family A (Hsp70) member 8 [Source:HGNC Symbol;Acc:HGNC:5241]	FALSE	TRUE	32.0433	15	17	8	High	High	High	High	Phospho [S254(100)]	43.75
High	ENSP00000225388.3	pep chromosome:GRCh38:17:29255839:29294148:-1 gene:ENSG00000108256.9 transcript:ENST00000225388.9 gene_biotype:protein_coding transcript_biotype:protein_coding gene_symbol:NUFIP2 description:nuclear FMR1 interacting protein 2 [Source:HGNC Symbol;Acc:HGNC:17634]	FALSE	TRUE	12.518	7	23	7	High	High	High	High	Phospho [S212(95.4); S572(99.9); S629(99.6); S652(99.9); S692(100)]	61.75
High	ENSP00000262013.7	pep chromosome:GRCh38:17:50962174:51120868:-1 gene:ENSG00000008294.21 transcript:ENST00000262013.12 gene_biotype:protein_coding transcript_biotype:protein_coding gene_symbol:SPAG9 description:sperm associated antigen 9 [Source:HGNC Symbol;Acc:HGNC:14524]	FALSE	TRUE	6.51022	6	23	6	High	High	High	High	Phospho [T217(100); S268(100); S332(100); S730(92.1); S732(92.6); S815(92)]	51.45
High	ENSP00000437073.1	pep chromosome:GRCh38:17:29071124:29180412:-1 gene:ENSG00000196535.16 transcript:ENST00000527372.6 gene_biotype:protein_coding transcript_biotype:protein_coding gene_symbol:MYO18A description:myosin XVIIIA [Source:HGNC Symbol;Acc:HGNC:31104]	FALSE	TRUE	5.59883	9	26	9	High	High	High	High	Phospho [S35(99.9); S145(99.5); S1970(100); S1998(100); S2007(82.1); S2020(97.6); S2041(100); S2043(99.8)]	68.3
High	ENSP00000349961.3	pep chromosome:GRCh38:3:160399650:160434953:1 gene:ENSG00000113810.16 transcript:ENST00000357388.8 gene_biotype:protein_coding transcript_biotype:protein_coding gene_symbol:SMC4 description:structural maintenance of chromosomes 4 [Source:HGNC Symbol;Acc:HGNC:14013]	FALSE	TRUE	3.41615	4	32	4	High	High	High	High	Phospho [S28(100)]	86.88
High	ENSP00000467423.1	pep chromosome:GRCh38:19:5623083:5668478:1 gene:ENSG00000160633.13 transcript:ENST00000588852.2 gene_biotype:protein_coding transcript_biotype:protein_coding gene_symbol:SAFB description:scaffold attachment factor B [Source:HGNC Symbol;Acc:HGNC:10520]	FALSE	TRUE	14.6129	9	29	9	High	High	High	High	Phospho [S234(90.8); S344(99.9); S383(87.7); S594(100); S596(100); S604(100)]	61.63
High	ENSP00000040738.5	pep chromosome:GRCh38:4:13568738:13627725:-1 gene:ENSG00000038219.13 transcript:ENST00000040738.10 gene_biotype:protein_coding transcript_biotype:protein_coding gene_symbol:BOD1L1 description:biorientation of chromosomes in cell division 1 like 1 [Source:HGNC Symbol;Acc:HGNC:31792]	FALSE	TRUE	4.09702	10	26	9	High	High	High	High	Phospho [Y480(92.5); S537(92); S1531(100); S2779(99.9); S2780(99.9); S2964(100); S2986(100); S3019(100); S3029(100)]	58.2
High	ENSP00000370129.4	pep chromosome:GRCh38:10:4987400:5004023:-1 gene:ENSG00000151632.17 transcript:ENST00000380753.8 gene_biotype:protein_coding transcript_biotype:protein_coding gene_symbol:AKR1C2 description:aldo-keto reductase family 1 member C2 [Source:HGNC Symbol;Acc:HGNC:385]	FALSE	TRUE	40.5573	12	16	5	High	High	High	High	Phospho [S290(92.9)]	43.17
High	ENSP00000211998.4	pep chromosome:GRCh38:10:73998114:74120160:1 gene:ENSG00000035403.17 transcript:ENST00000211998.9 gene_biotype:protein_coding transcript_biotype:protein_coding gene_symbol:VCL description:vinculin [Source:HGNC Symbol;Acc:HGNC:12665]	FALSE	TRUE	7.05467	6	16	6	High	High	High	High	Phospho [S290(100); S345(95.9); S566(100); T604(100); S721(99.9)]	43.52
High	ENSP00000365175.4	pep chromosome:GRCh38:6:31620720:31637771:1 gene:ENSG00000204469.13 transcript:ENST00000376007.8 gene_biotype:protein_coding transcript_biotype:protein_coding gene_symbol:PRRC2A description:proline rich coiled-coil 2A [Source:HGNC Symbol;Acc:HGNC:13918]	FALSE	TRUE	6.67594	13	27	13	High	High	High	High	Phospho [S350(100); S380(100); T610(90.7); T782(100); Y1013(86.5); T1087(91.6); S1089(87.4); S1110(87.6); T1112(87.4); S1219(100); S1435(100)]	48.54
High	ENSP00000302139.4	pep chromosome:GRCh38:5:150640660:150659207:1 gene:ENSG00000171992.13 transcript:ENST00000307662.5 gene_biotype:protein_coding transcript_biotype:protein_coding gene_symbol:SYNPO description:synaptopodin [Source:HGNC Symbol;Acc:HGNC:30672]	FALSE	TRUE	20.4873	11	21	5	High	High	High	High	Phospho [S19(100); S292(100); S441(100); S510(99.5); S589(98.7); S736(98.1); S784(100); S812(99.7); T856(94.6)]	40.6
High	ENSP00000464036.2	pep chromosome:GRCh38:1:1635587:1659012:-1 gene:ENSG00000248333.8 transcript:ENST00000407249.7 gene_biotype:protein_coding transcript_biotype:protein_coding gene_symbol:CDK11B description:cyclin dependent kinase 11B [Source:HGNC Symbol;Acc:HGNC:1729]	FALSE	TRUE	11.5723	9	26	3	High	High	High	High	Phospho [S47(100); S65(81.2); S115(99.7); S234(100); S283(100); S589(99.2)]	53.6
High	ENSP00000482075.1	pep chromosome:GRCh38:12:56663343:56688408:-1 gene:ENSG00000110958.16 transcript:ENST00000614328.4 gene_biotype:protein_coding transcript_biotype:protein_coding gene_symbol:PTGES3 description:prostaglandin E synthase 3 [Source:HGNC Symbol;Acc:HGNC:16049]	FALSE	TRUE	32.3171	2	46	1	High	High	High	High	Phospho [S117(100); S155(95.4)]	181.89
High	ENSP00000238081.3	pep chromosome:GRCh38:2:9583967:9630997:-1 gene:ENSG00000134308.14 transcript:ENST00000238081.8 gene_biotype:protein_coding transcript_biotype:protein_coding gene_symbol:YWHAQ description:tyrosine 3-monooxygenase/tryptophan 5-monooxygenase activation protein theta [Source:HGNC Symbol;Acc:HGNC:12854]	FALSE	TRUE	37.1429	6	13	4	High	High	High	High	Phospho [S232(100)]	54.23
High	ENSP00000430432.1	pep chromosome:GRCh38:6:113933028:113971148:-1 gene:ENSG00000196591.12 transcript:ENST00000519065.6 gene_biotype:protein_coding transcript_biotype:protein_coding gene_symbol:HDAC2 description:histone deacetylase 2 [Source:HGNC Symbol;Acc:HGNC:4853]	FALSE	TRUE	10.6557	3	16	3	High	High	High	High	Phospho [S394(100); S422(100)]	58.22
High	ENSP00000439093.1	pep chromosome:GRCh38:12:122272834:122380494:-1 gene:ENSG00000130779.20 transcript:ENST00000540338.5 gene_biotype:protein_coding transcript_biotype:protein_coding gene_symbol:CLIP1 description:CAP-Gly domain containing linker protein 1 [Source:HGNC Symbol;Acc:HGNC:10461]	FALSE	TRUE	6.81502	5	17	5	High	High	High	High	Phospho [T50(100); T182(94.4); S204(100)]	46.23
High	ENSP00000353114.4	pep chromosome:GRCh38:14:104937253:104978374:-1 gene:ENSG00000185567.7 transcript:ENST00000333244.6 gene_biotype:protein_coding transcript_biotype:protein_coding gene_symbol:AHNAK2 description:AHNAK nucleoprotein 2 [Source:HGNC Symbol;Acc:HGNC:20125]	FALSE	TRUE	4.84901	10	18	10	High	High	High	High	Phospho [S102(100); T228(99.1); S294(100); S332(99.9); S593(92.8); S3408(100); S37998(100); S37998(99.7); S37998(100)]	47.85
High	ENSP00000364403.3	pep chromosome:GRCh38:1:19074510:19210266:-1 gene:ENSG00000127481.15 transcript:ENST00000375254.8 gene_biotype:protein_coding transcript_biotype:protein_coding gene_symbol:UBR4 description:ubiquitin protein ligase E3 component n-recognin 4 [Source:HGNC Symbol;Acc:HGNC:30313]	FALSE	TRUE	2.06444	6	27	6	High	High	High	High	Phospho [S362(75.8); T2724(99.4); S2885(89.4)]	48.59
High	ENSP00000387691.4	pep chromosome:GRCh38:CHR_HSCHR6_MHC_APD_CTG1:31894980:31896908:1 gene:ENSG00000232804.5 transcript:ENST00000417199.4 gene_biotype:protein_coding transcript_biotype:protein_coding gene_symbol:HSPA1B description:heat shock protein family A (Hsp70) member 1B [Source:HGNC Symbol;Acc:HGNC:5233]	FALSE	TRUE	22.8972	11	16	7	High	High	High	High	Phospho [S632(93.2)]	41.82
High	ENSP00000351052.4	pep chromosome:GRCh38:7:130018286:130051451:-1 gene:ENSG00000091732.16 transcript:ENST00000358303.8 gene_biotype:protein_coding transcript_biotype:protein_coding gene_symbol:ZC3HC1 description:zinc finger C3HC-type containing 1 [Source:HGNC Symbol;Acc:HGNC:29913]	FALSE	TRUE	16.9323	7	22	7	High	High	High	High	Phospho [S321(100); S344(100); S358(89.5); S359(89.5); S370(79.4); S395(94)]	41.33
High	ENSP00000357283.4	pep chromosome:GRCh38:1:156114711:156140081:1 gene:ENSG00000160789.20 transcript:ENST00000368300.9 gene_biotype:protein_coding transcript_biotype:protein_coding gene_symbol:LMNA description:lamin A/C [Source:HGNC Symbol;Acc:HGNC:6636]	FALSE	TRUE	8.73494	6	27	5	High	High	High	High	Phospho [S22(86.4); S392(99.4)]	50.96
High	ENSP00000254950.11	pep chromosome:GRCh38:16:69311350:69326939:1 gene:ENSG00000132612.16 transcript:ENST00000254950.13 gene_biotype:protein_coding transcript_biotype:protein_coding gene_symbol:VPS4A description:vacuolar protein sorting 4 homolog A [Source:HGNC Symbol;Acc:HGNC:13488]	FALSE	TRUE	4.80549	4	24	4	High	High	High	High	Phospho [S97(99.5)]	59.92
High	ENSP00000397894.2	pep chromosome:GRCh38:CHR_HSCHR6_MHC_COX_CTG1:31626429:31640044:-1 gene:ENSG00000229524.10 transcript:ENST00000449450.6 gene_biotype:protein_coding transcript_biotype:protein_coding gene_symbol:BAG6 description:BCL2 associated athanogene 6 [Source:HGNC Symbol;Acc:HGNC:13919]	FALSE	TRUE	4.947	6	16	6	High	High	High	High	Phospho [S964(100); S973(100); S1117(99.8)]	53.28
High	ENSP00000248594.6	pep chromosome:GRCh38:7:77537295:77640069:1 gene:ENSG00000127947.16 transcript:ENST00000248594.11 gene_biotype:protein_coding transcript_biotype:protein_coding gene_symbol:PTPN12 description:protein tyrosine phosphatase non-receptor type 12 [Source:HGNC Symbol;Acc:HGNC:9645]	FALSE	TRUE	20.1282	8	21	8	High	High	High	High	Phospho [S332(99.8); S435(100); S517(79.3); S588(92.7); S606(99.2); S673(100)]	54.26
High	ENSP00000268712.2	pep chromosome:GRCh38:17:16029157:16215534:-1 gene:ENSG00000141027.21 transcript:ENST00000268712.8 gene_biotype:protein_coding transcript_biotype:protein_coding gene_symbol:NCOR1 description:nuclear receptor corepressor 1 [Source:HGNC Symbol;Acc:HGNC:7672]	FALSE	TRUE	6.47541	8	20	8	High	High	High	High	Phospho [S158(92); S224(100); S1472(100); S1977(99); S2151(100); S2184(94.2); S2438(100)]	53.28
High	ENSP00000283195.6	pep chromosome:GRCh38:2:108719482:108785809:1 gene:ENSG00000153201.16 transcript:ENST00000283195.11 gene_biotype:protein_coding transcript_biotype:protein_coding gene_symbol:RANBP2 description:RAN binding protein 2 [Source:HGNC Symbol;Acc:HGNC:9848]	FALSE	TRUE	6.54467	16	27	11	High	High	High	High	Phospho [S781(94.5); S788(87); S1160(97.7); S1400(99.7); S2280(99.2); S2297(99.8); S2447(98.4); S2454(100); S2457(88.2); S2462(100); S2510(100); T2639(96.3); S2668(100); S2900(99.9); S3207(100)]	45.83
High	ENSP00000375863.2	pep chromosome:GRCh38:19:41264372:41307787:1 gene:ENSG00000105323.17 transcript:ENST00000392006.8 gene_biotype:protein_coding transcript_biotype:protein_coding gene_symbol:HNRNPUL1 description:heterogeneous nuclear ribonucleoprotein U like 1 [Source:HGNC Symbol;Acc:HGNC:17011]	FALSE	TRUE	7.47664	4	21	4	High	High	High	High	Phospho [S194(100)]	64.36
High	ENSP00000441625.1	pep chromosome:GRCh38:2:121337776:121649476:-1 gene:ENSG00000074054.18 transcript:ENST00000541377.5 gene_biotype:protein_coding transcript_biotype:protein_coding gene_symbol:CLASP1 description:cytoplasmic linker associated protein 1 [Source:HGNC Symbol;Acc:HGNC:17088]	FALSE	TRUE	7.17671	12	22	1	High	High	High	High	Phospho [S572(99.8); S600(99.9); S662(91); S691(99.2); S730(100); S734(99.3); S738(99.3); S1069(89.9); S1135(97.8); S1162(100)]	44.68
High	ENSP00000496269.1	pep chromosome:GRCh38:2:121337776:121606060:-1 gene:ENSG00000074054.18 transcript:ENST00000646274.1 gene_biotype:protein_coding transcript_biotype:protein_coding gene_symbol:CLASP1 description:cytoplasmic linker associated protein 1 [Source:HGNC Symbol;Acc:HGNC:17088]	FALSE	TRUE	7.3472	12	21	1	High	High	High	High	Phospho [S572(99.8); S600(99.9); S646(91); S723(100); S727(99.3); S731(99.3); S1091(89.9); S1196(97.8); S1223(100)]	42.93
High	ENSP00000362649.3	pep chromosome:GRCh38:1:32292083:32333626:1 gene:ENSG00000116478.12 transcript:ENST00000373548.8 gene_biotype:protein_coding transcript_biotype:protein_coding gene_symbol:HDAC1 description:histone deacetylase 1 [Source:HGNC Symbol;Acc:HGNC:4852]	FALSE	TRUE	10.7884	3	20	3	High	High	High	High	Phospho [S393(100); S421(100); S423(100)]	54.16
High	ENSP00000319104.6	pep chromosome:GRCh38:17:28662205:28702679:1 gene:ENSG00000109111.15 transcript:ENST00000314616.11 gene_biotype:protein_coding transcript_biotype:protein_coding gene_symbol:SUPT6H description:SPT6 homolog, histone chaperone and transcription elongation factor [Source:HGNC Symbol;Acc:HGNC:11470]	FALSE	TRUE	2.89687	2	14	2	High	High	High	High	Phospho [S78(99.9); S125(100)]	56.63
High	ENSP00000318690.3	pep chromosome:GRCh38:2:75662705:75710915:-1 gene:ENSG00000005436.14 transcript:ENST00000321027.8 gene_biotype:protein_coding transcript_biotype:protein_coding gene_symbol:GCFC2 description:GC-rich sequence DNA-binding factor 2 [Source:HGNC Symbol;Acc:HGNC:1317]	FALSE	TRUE	6.91421	5	20	5	High	High	High	High	Phospho [S119(81.8); S122(90.7); S180(100)]	57.05
High	ENSP00000305027.11	pep chromosome:GRCh38:18:8705661:8828946:1 gene:ENSG00000168502.17 transcript:ENST00000306329.15 gene_biotype:protein_coding transcript_biotype:protein_coding gene_symbol:MTCL1 description:microtubule crosslinking factor 1 [Source:HGNC Symbol;Acc:HGNC:29121]	FALSE	TRUE	11.4961	13	23	13	High	High	High	High	Phospho [S77(100); S213(88.8); S221(100); S240(85.2); S241(97.5); S263(100); S306(100); S622(99.3); S749(99.9); S756(97.8); S776(99.7); T1417(100); S1421(100); S1514(100); S1812(100); S1814(100)]	47.2
High	ENSP00000254029.3	pep chromosome:GRCh38:X:118346106:118449961:1 gene:ENSG00000131725.14 transcript:ENST00000254029.8 gene_biotype:protein_coding transcript_biotype:protein_coding gene_symbol:WDR44 description:WD repeat domain 44 [Source:HGNC Symbol;Acc:HGNC:30512]	FALSE	TRUE	10.5148	6	16	6	High	High	High	High	Phospho [S96(99.9); T219(100); S403(100); S561(100)]	47.98
High	ENSP00000382633.1	pep chromosome:GRCh38:1:25900118:25906153:-1 gene:ENSG00000117632.23 transcript:ENST00000399728.5 gene_biotype:protein_coding transcript_biotype:protein_coding gene_symbol:STMN1 description:stathmin 1 [Source:HGNC Symbol;Acc:HGNC:6510]	FALSE	TRUE	34.2282	7	18	7	High	High	High	High	Phospho [S25(100); S38(100); S63(100)]	39.59
High	ENSP00000260970.3	pep chromosome:GRCh38:2:169584351:169641406:1 gene:ENSG00000138398.16 transcript:ENST00000260970.8 gene_biotype:protein_coding transcript_biotype:protein_coding gene_symbol:PPIG description:peptidylprolyl isomerase G [Source:HGNC Symbol;Acc:HGNC:14650]	FALSE	TRUE	9.41645	13	25	13	High	High	High	High	Phospho [S397(100); S415(95); T611(100); S687(100); S696(100); S744(95.8)]	18.62
High	ENSP00000467556.1	pep chromosome:GRCh38:17:44395281:44503406:-1 gene:ENSG00000186566.13 transcript:ENST00000591680.6 gene_biotype:protein_coding transcript_biotype:protein_coding gene_symbol:GPATCH8 description:G-patch domain containing 8 [Source:HGNC Symbol;Acc:HGNC:29066]	FALSE	TRUE	7.85619	9	17	9	High	High	High	High	Phospho [S653(92.5); S740(99.2); S758(99.9); S820(89.4); S898(92.6); S908(100); S911(100); S914(100); S1081(100); S1109(95.3)]	43.01
High	ENSP00000369716.4	pep chromosome:GRCh38:17:7884796:7912755:1 gene:ENSG00000170004.17 transcript:ENST00000380358.9 gene_biotype:protein_coding transcript_biotype:protein_coding gene_symbol:CHD3 description:chromodomain helicase DNA binding protein 3 [Source:HGNC Symbol;Acc:HGNC:1918]	FALSE	TRUE	6.31374	7	15	7	High	High	High	High	Phospho [S66(100); S132(99.6); S656(99.5); S772(93.7); S1612(75.6); S1660(100); S1664(100)]	41.68
High	ENSP00000383700.2	pep chromosome:GRCh38:1:8352404:8817640:-1 gene:ENSG00000142599.19 transcript:ENST00000400908.7 gene_biotype:protein_coding transcript_biotype:protein_coding gene_symbol:RERE description:arginine-glutamic acid dipeptide repeats [Source:HGNC Symbol;Acc:HGNC:9965]	FALSE	TRUE	5.81098	9	19	9	High	High	High	High	Phospho [S53(100); S56(100); S594(100); S613(93); S642(100); S656(99.7); S675(100); S679(100)]	45.43
High	ENSP00000266732.4	pep chromosome:GRCh38:12:98515630:98535634:1 gene:ENSG00000120802.13 transcript:ENST00000266732.8 gene_biotype:protein_coding transcript_biotype:protein_coding gene_symbol:TMPO description:thymopoietin [Source:HGNC Symbol;Acc:HGNC:11875]	FALSE	TRUE	11.0951	5	20	2	High	High	High	High	Phospho [T74(100); S159(99.9); T160(100); S184(86.1); S424(100)]	53.3
High	ENSP00000450627.1	pep chromosome:GRCh38:12:98515512:98550379:1 gene:ENSG00000120802.13 transcript:ENST00000556029.5 gene_biotype:protein_coding transcript_biotype:protein_coding gene_symbol:TMPO description:thymopoietin [Source:HGNC Symbol;Acc:HGNC:11875]	FALSE	TRUE	20.9251	6	21	3	High	High	High	High	Phospho [T74(100); S159(99.9); T160(100); T208(93.4); S306(100)]	52.13
High	ENSP00000373489.2	pep chromosome:GRCh38:12:52948871:52952900:1 gene:ENSG00000111057.11 transcript:ENST00000388837.6 gene_biotype:protein_coding transcript_biotype:protein_coding gene_symbol:KRT18 description:keratin 18 [Source:HGNC Symbol;Acc:HGNC:6430]	FALSE	TRUE	28.1395	10	15	9	High	High	High	High	Phospho [S100(100); S420(99.6)]	41.89
High	ENSP00000489993.1	pep chromosome:GRCh38:CHR_HSCHR2_6_CTG7_2:206159585:206162928:1 gene:ENSG00000283391.2 transcript:ENST00000635728.1 gene_biotype:protein_coding transcript_biotype:protein_coding gene_symbol:EEF1B2 description:eukaryotic translation elongation factor 1 beta 2 [Source:HGNC Symbol;Acc:HGNC:3208]	FALSE	TRUE	17.3333	4	33	4	High	High	High	High	Phospho [S106(100)]	88.05
High	ENSP00000351777.6	pep chromosome:GRCh38:9:35056064:35072625:-1 gene:ENSG00000165280.16 transcript:ENST00000358901.11 gene_biotype:protein_coding transcript_biotype:protein_coding gene_symbol:VCP description:valosin containing protein [Source:HGNC Symbol;Acc:HGNC:12666]	FALSE	TRUE	11.2903	6	13	6	High	High	High	High	Phospho [T509(86.2)]	51.14
High	ENSP00000377833.4	pep chromosome:GRCh38:2:69742134:69827112:1 gene:ENSG00000196975.16 transcript:ENST00000394295.6 gene_biotype:protein_coding transcript_biotype:protein_coding gene_symbol:ANXA4 description:annexin A4 [Source:HGNC Symbol;Acc:HGNC:542]	FALSE	TRUE	36.4486	10	12	9	High	High	High	High	Phospho [S14(100)]	35.89
High	ENSP00000371293.3	pep chromosome:GRCh38:8:17643795:17800917:-1 gene:ENSG00000129422.14 transcript:ENST00000381869.5 gene_biotype:protein_coding transcript_biotype:protein_coding gene_symbol:MTUS1 description:microtubule associated scaffold protein 1 [Source:HGNC Symbol;Acc:HGNC:29789]	FALSE	TRUE	8.79934	8	16	8	High	High	High	High	Phospho [S443(99.4); S541(99.2); S663(100); S1170(100); S1191(98.8); S1210(89.8); S1214(99.8)]	36.01
High	ENSP00000253048.4	pep chromosome:GRCh38:19:47064187:47113776:-1 gene:ENSG00000130749.10 transcript:ENST00000253048.10 gene_biotype:protein_coding transcript_biotype:protein_coding gene_symbol:ZC3H4 description:zinc finger CCCH-type containing 4 [Source:HGNC Symbol;Acc:HGNC:17808]	FALSE	TRUE	6.06293	5	15	5	High	High	High	High	Phospho [S94(100); S1114(100); S1275(100)]	37.9
High	ENSP00000401177.2	pep chromosome:GRCh38:9:92297358:92325350:-1 gene:ENSG00000198000.12 transcript:ENST00000442668.7 gene_biotype:protein_coding transcript_biotype:protein_coding gene_symbol:NOL8 description:nucleolar protein 8 [Source:HGNC Symbol;Acc:HGNC:23387]	FALSE	TRUE	5.74122	4	11	4	High	High	High	High	Phospho [S304(100); S845(100); S1082(100); S1083(100); S1084(100)]	38.93
High	ENSP00000221265.2	pep chromosome:GRCh38:19:39385629:39391106:-1 gene:ENSG00000006712.15 transcript:ENST00000221265.8 gene_biotype:protein_coding transcript_biotype:protein_coding gene_symbol:PAF1 description:PAF1 homolog, Paf1/RNA polymerase II complex component [Source:HGNC Symbol;Acc:HGNC:25459]	FALSE	TRUE	21.0923	6	24	6	High	High	High	High	Phospho [S394(100); S402(90.8); S460(100); S505(91)]	52.31
High	ENSP00000439800.1	pep chromosome:GRCh38:20:47209214:47356414:-1 gene:ENSG00000101040.19 transcript:ENST00000536340.5 gene_biotype:protein_coding transcript_biotype:protein_coding gene_symbol:ZMYND8 description:zinc finger MYND-type containing 8 [Source:HGNC Symbol;Acc:HGNC:9397]	FALSE	TRUE	9.18614	8	18	8	High	High	High	High	Phospho [S433(100); S452(100); S502(100); S505(99.4); S517(85.6); S574(100); S695(100); S783(99.8)]	35.44
High	ENSP00000261167.2	pep chromosome:GRCh38:12:14784582:14803478:-1 gene:ENSG00000084463.8 transcript:ENST00000261167.7 gene_biotype:protein_coding transcript_biotype:protein_coding gene_symbol:WBP11 description:WW domain binding protein 11 [Source:HGNC Symbol;Acc:HGNC:16461]	FALSE	TRUE	6.08424	3	13	3	High	High	High	High	Phospho [Y236(89); S364(100)]	52.7
High	ENSP00000386759.3	pep chromosome:GRCh38:3:47016689:47163967:-1 gene:ENSG00000181555.20 transcript:ENST00000409792.3 gene_biotype:protein_coding transcript_biotype:protein_coding gene_symbol:SETD2 description:SET domain containing 2, histone lysine methyltransferase [Source:HGNC Symbol;Acc:HGNC:18420]	FALSE	TRUE	3.82215	7	12	7	High	High	High	High	Phospho [S323(100); S614(100); S1417(99.9); S1844(99); S1845(98.3); T1853(100); S2080(98.8); S2082(100)]	43
High	ENSP00000492983.1	pep chromosome:GRCh38:19:3314403:3469217:1 gene:ENSG00000141905.19 transcript:ENST00000641145.1 gene_biotype:protein_coding transcript_biotype:protein_coding gene_symbol:NFIC description:nuclear factor I C [Source:HGNC Symbol;Acc:HGNC:7786]	FALSE	TRUE	12.8302	6	15	6	High	High	High	High	Phospho [S214(99.6); S345(99.7); S361(100)]	39.47
High	ENSP00000360464.3	pep chromosome:GRCh38:X:119920672:119943751:-1 gene:ENSG00000101882.10 transcript:ENST00000371410.5 gene_biotype:protein_coding transcript_biotype:protein_coding gene_symbol:NKAP description:NFKB activating protein [Source:HGNC Symbol;Acc:HGNC:29873]	FALSE	TRUE	13.9759	5	11	5	High	High	High	High	Phospho [S9(100); S149(100); S157(100)]	36.51
High	ENSP00000369927.3	pep chromosome:GRCh38:10:5094414:5107686:1 gene:ENSG00000196139.14 transcript:ENST00000380554.5 gene_biotype:protein_coding transcript_biotype:protein_coding gene_symbol:AKR1C3 description:aldo-keto reductase family 1 member C3 [Source:HGNC Symbol;Acc:HGNC:386]	FALSE	TRUE	42.4149	12	14	5	High	High	High	High	Phospho [S129(99.7)]	37.42
High	ENSP00000355568.3	pep chromosome:GRCh38:1:234604269:234609525:-1 gene:ENSG00000168264.10 transcript:ENST00000366609.3 gene_biotype:protein_coding transcript_biotype:protein_coding gene_symbol:IRF2BP2 description:interferon regulatory factor 2 binding protein 2 [Source:HGNC Symbol;Acc:HGNC:21729]	FALSE	TRUE	17.3765	8	22	8	High	High	High	High	Phospho [S71(100); S175(100); S240(93.5); S360(100)]	39.89
High	ENSP00000441692.2	pep chromosome:GRCh38:14:32076985:32155083:1 gene:ENSG00000100852.13 transcript:ENST00000539826.6 gene_biotype:protein_coding transcript_biotype:protein_coding gene_symbol:ARHGAP5 description:Rho GTPase activating protein 5 [Source:HGNC Symbol;Acc:HGNC:675]	FALSE	TRUE	3.26232	5	12	5	High	High	High	High	Phospho [S1173(99.6); S1202(100); S1218(100)]	34.53
High	ENSP00000394041.1	pep chromosome:GRCh38:3:48747515:48847804:-1 gene:ENSG00000114302.16 transcript:ENST00000454963.5 gene_biotype:protein_coding transcript_biotype:protein_coding gene_symbol:PRKAR2A description:protein kinase cAMP-dependent type II regulatory subunit alpha [Source:HGNC Symbol;Acc:HGNC:9391]	FALSE	TRUE	10.8911	3	13	3	High	High	High	High	Phospho [S78(92.5); S99(100)]	52.98
High	ENSP00000355343.2	pep chromosome:GRCh38:1:154225082:154270853:1 gene:ENSG00000143569.19 transcript:ENST00000361546.6 gene_biotype:protein_coding transcript_biotype:protein_coding gene_symbol:UBAP2L description:ubiquitin associated protein 2 like [Source:HGNC Symbol;Acc:HGNC:29877]	FALSE	TRUE	6.71573	5	32	5	High	High	High	High	Phospho [S116(99.9); S467(93.9); S609(94.3)]	54.34
High	ENSP00000340691.4	pep chromosome:GRCh38:8:38030534:38060365:1 gene:ENSG00000187840.5 transcript:ENST00000338825.5 gene_biotype:protein_coding transcript_biotype:protein_coding gene_symbol:EIF4EBP1 description:eukaryotic translation initiation factor 4E binding protein 1 [Source:HGNC Symbol;Acc:HGNC:3288]	FALSE	TRUE	62.7119	8	37	8	High	High	High	High	Phospho [T46(78.9); T68(92.2); S101(100)]	60.35
High	ENSP00000345808.2	pep chromosome:GRCh38:10:31805398:31928831:-1 gene:ENSG00000165322.18 transcript:ENST00000344936.7 gene_biotype:protein_coding transcript_biotype:protein_coding gene_symbol:ARHGAP12 description:Rho GTPase activating protein 12 [Source:HGNC Symbol;Acc:HGNC:16348]	FALSE	TRUE	14.1844	7	12	7	High	High	High	High	Phospho [S103(96.4); S165(100); S176(100); S201(100); S215(100); S240(99.9); S592(100)]	33.47
High	ENSP00000361524.3	pep chromosome:GRCh38:9:129827290:129835275:-1 gene:ENSG00000136819.15 transcript:ENST00000372447.7 gene_biotype:protein_coding transcript_biotype:protein_coding gene_symbol:C9orf78 description:chromosome 9 open reading frame 78 [Source:HGNC Symbol;Acc:HGNC:24932]	FALSE	TRUE	11.7647	4	25	4	High	High	High	High	Phospho [S17(100); S261(100)]	66
High	ENSP00000363921.3	pep chromosome:GRCh38:10:34109561:34815296:-1 gene:ENSG00000148498.16 transcript:ENST00000374789.8 gene_biotype:protein_coding transcript_biotype:protein_coding gene_symbol:PARD3 description:par-3 family cell polarity regulator [Source:HGNC Symbol;Acc:HGNC:16051]	FALSE	TRUE	7.89086	8	13	8	High	High	High	High	Phospho [S144(92.7); S174(98.2); Y199(94.1); S383(100); S728(93.5); S827(100); S852(100)]	30.25
High	ENSP00000356716.3	pep chromosome:GRCh38:1:171485551:171593511:1 gene:ENSG00000117523.16 transcript:ENST00000367742.7 gene_biotype:protein_coding transcript_biotype:protein_coding gene_symbol:PRRC2C description:proline rich coiled-coil 2C [Source:HGNC Symbol;Acc:HGNC:24903]	FALSE	TRUE	4.54062	9	38	9	High	High	High	High	Phospho [S502(100); S926(88.5); S1244(99.6); S2015(82.4); S2107(100); T2675(100); S2696(94.7)]	55.24
High	ENSP00000375711.1	pep chromosome:GRCh38:19:49869046:49878028:-1 gene:ENSG00000204673.10 transcript:ENST00000391835.1 gene_biotype:protein_coding transcript_biotype:protein_coding gene_symbol:AKT1S1 description:AKT1 substrate 1 [Source:HGNC Symbol;Acc:HGNC:28426]	FALSE	TRUE	14.8551	5	16	5	High	High	High	High	Phospho [S203(94.9); S232(99.7); S267(95.3)]	42.96
High	ENSP00000359988.3	pep chromosome:GRCh38:1:70205724:70253052:1 gene:ENSG00000116754.13 transcript:ENST00000370950.7 gene_biotype:protein_coding transcript_biotype:protein_coding gene_symbol:SRSF11 description:serine and arginine rich splicing factor 11 [Source:HGNC Symbol;Acc:HGNC:10782]	FALSE	TRUE	16.3223	11	23	11	High	High	High	High	Phospho [S207(100); S304(99.5); S308(91.7); S366(100); S368(100); S370(100); S396(100); S412(99.9); S434(100); S449(96.3); S456(100)]	28.44
High	ENSP00000442739.2	pep chromosome:GRCh38:12:991233:1490729:1 gene:ENSG00000082805.20 transcript:ENST00000546231.6 gene_biotype:protein_coding transcript_biotype:protein_coding gene_symbol:ERC1 description:ELKS/RAB6-interacting/CAST family member 1 [Source:HGNC Symbol;Acc:HGNC:17072]	FALSE	TRUE	3.57143	5	17	5	High	High	High	High	Phospho [S21(100); T38(93.7); S191(100)]	29.37
High	ENSP00000282516.8	pep chromosome:GRCh38:5:36876769:37066413:1 gene:ENSG00000164190.19 transcript:ENST00000282516.13 gene_biotype:protein_coding transcript_biotype:protein_coding gene_symbol:NIPBL description:NIPBL cohesin loading factor [Source:HGNC Symbol;Acc:HGNC:28862]	FALSE	TRUE	3.24536	7	15	7	High	High	High	High	Phospho [S318(100); S350(99.4); T735(100); S892(100); S1096(99.3); S2658(100); S2672(100)]	39.04
High	ENSP00000377944.3	pep chromosome:GRCh38:X:129906164:129929752:1 gene:ENSG00000156697.13 transcript:ENST00000394422.8 gene_biotype:protein_coding transcript_biotype:protein_coding gene_symbol:UTP14A description:UTP14A small subunit processome component [Source:HGNC Symbol;Acc:HGNC:10665]	FALSE	TRUE	9.20882	4	26	4	High	High	High	High	Phospho [S31(100); S405(87.3); S445(100)]	64
High	ENSP00000482106.1	pep chromosome:GRCh38:CHR_HSCHR14_7_CTG1:94050922:94081245:-1 gene:ENSG00000273761.5 transcript:ENST00000613280.4 gene_biotype:protein_coding transcript_biotype:protein_coding gene_symbol:DDX24 description:DEAD-box helicase 24 [Source:HGNC Symbol;Acc:HGNC:13266]	FALSE	TRUE	6.05355	4	16	4	High	High	High	High	Phospho [S82(100); S94(99.5); S287(100)]	39.5
High	ENSP00000354878.5	pep chromosome:GRCh38:12:39294421:39442986:-1 gene:ENSG00000139116.18 transcript:ENST00000361418.9 gene_biotype:protein_coding transcript_biotype:protein_coding gene_symbol:KIF21A description:kinesin family member 21A [Source:HGNC Symbol;Acc:HGNC:19349]	FALSE	TRUE	5.07766	6	18	6	High	High	High	High	Phospho [T579(92.6); S853(93.7); S1212(100); S1229(93.7); S1239(100); S1673(100)]	49.36
High	ENSP00000367900.1	pep chromosome:GRCh38:1:1702881:1724324:-1 gene:ENSG00000008128.23 transcript:ENST00000378633.5 gene_biotype:protein_coding transcript_biotype:protein_coding gene_symbol:CDK11A description:cyclin dependent kinase 11A [Source:HGNC Symbol;Acc:HGNC:1730]	FALSE	TRUE	9.32312	7	21	1	High	High	High	High	Phospho [S47(100); S222(100); S271(100); S577(99.2); Y582(95.9)]	46.3
High	ENSP00000385442.1	pep chromosome:GRCh38:7:73441565:73522278:-1 gene:ENSG00000009954.11 transcript:ENST00000404251.1 gene_biotype:protein_coding transcript_biotype:protein_coding gene_symbol:BAZ1B description:bromodomain adjacent to zinc finger domain 1B [Source:HGNC Symbol;Acc:HGNC:961]	FALSE	TRUE	7.34997	9	15	9	High	High	High	High	Phospho [S312(92); S349(100); S705(100); S708(94.3); S947(100); S1342(100); S1468(100)]	38.14
High	ENSP00000369218.4	pep chromosome:GRCh38:10:6089034:6117447:1 gene:ENSG00000134453.16 transcript:ENST00000379888.9 gene_biotype:protein_coding transcript_biotype:protein_coding gene_symbol:RBM17 description:RNA binding motif protein 17 [Source:HGNC Symbol;Acc:HGNC:16944]	FALSE	TRUE	16.2095	5	16	5	High	High	High	High	Phospho [T71(100); S155(100); S222(99.7)]	48.92
High	ENSP00000426850.1	pep chromosome:GRCh38:5:32585571:32601282:1 gene:ENSG00000113387.12 transcript:ENST00000515355.5 gene_biotype:protein_coding transcript_biotype:protein_coding gene_symbol:SUB1 description:SUB1 regulator of transcription [Source:HGNC Symbol;Acc:HGNC:19985]	FALSE	TRUE	23.622	3	19	3	High	High	High	High	Phospho [S17(99.7); S118(100)]	54.73
High	ENSP00000368767.4	pep chromosome:GRCh38:8:61500556:61714592:-1 gene:ENSG00000198363.18 transcript:ENST00000379454.9 gene_biotype:protein_coding transcript_biotype:protein_coding gene_symbol:ASPH description:aspartate beta-hydroxylase [Source:HGNC Symbol;Acc:HGNC:757]	FALSE	TRUE	9.89446	3	18	3	High	High	High	High	Phospho [S29(99.2)]	42.85
High	ENSP00000358374.3	pep chromosome:GRCh38:12:45919131:45990574:-1 gene:ENSG00000139218.18 transcript:ENST00000369367.8 gene_biotype:protein_coding transcript_biotype:protein_coding gene_symbol:SCAF11 description:SR-related CTD associated factor 11 [Source:HGNC Symbol;Acc:HGNC:10784]	FALSE	TRUE	6.56186	8	17	8	High	High	High	High	Phospho [S413(93); S608(100); S776(78.8); S880(91.2); S882(99.9); S902(99.6); S963(92.1)]	35.57
High	ENSP00000402644.2	pep chromosome:GRCh38:17:15571491:15651653:-1 gene:ENSG00000251537.4 transcript:ENST00000455584.2 gene_biotype:protein_coding transcript_biotype:protein_coding gene_symbol:AC005324.3 description:novel tripartite motif-containing 16 (TRIM16) and CMT1A duplicated region transcript 1 (CDRT1) protein	FALSE	TRUE	5.87618	2	24	2	High	High	High	High	Phospho [S27(93.4); S60(99.6)]	82.44
High	ENSP00000336752.6	pep chromosome:GRCh38:4:53377641:53460862:1 gene:ENSG00000145216.16 transcript:ENST00000337488.11 gene_biotype:protein_coding transcript_biotype:protein_coding gene_symbol:FIP1L1 description:factor interacting with PAPOLA and CPSF1 [Source:HGNC Symbol;Acc:HGNC:19124]	FALSE	TRUE	9.76431	5	19	5	High	High	High	High	Phospho [S500(100); S554(100); S587(91.6)]	41.95
High	ENSP00000370589.3	pep chromosome:GRCh38:20:2652632:2658393:1 gene:ENSG00000101361.17 transcript:ENST00000329276.10 gene_biotype:protein_coding transcript_biotype:protein_coding gene_symbol:NOP56 description:NOP56 ribonucleoprotein [Source:HGNC Symbol;Acc:HGNC:15911]	FALSE	TRUE	6.22896	3	25	3	High	High	High	High	Phospho [S570(95.5)]	47.1
High	ENSP00000373696.4	pep chromosome:GRCh38:2:229767441:229921999:-1 gene:ENSG00000153827.13 transcript:ENST00000389044.8 gene_biotype:protein_coding transcript_biotype:protein_coding gene_symbol:TRIP12 description:thyroid hormone receptor interactor 12 [Source:HGNC Symbol;Acc:HGNC:12306]	FALSE	TRUE	5.63725	11	27	11	High	High	High	High	Phospho [S119(100); S127(93.9); S203(89.3); S990(99.4); S1039(94); S1045(100); Y1063(93.6); S1084(100); S1475(94.7)]	44.97
High	ENSP00000265056.7	pep chromosome:GRCh38:3:127598411:127622436:1 gene:ENSG00000073111.14 transcript:ENST00000265056.12 gene_biotype:protein_coding transcript_biotype:protein_coding gene_symbol:MCM2 description:minichromosome maintenance complex component 2 [Source:HGNC Symbol;Acc:HGNC:6944]	FALSE	TRUE	4.64602	6	44	6	High	High	High	High	Phospho [S27(100); S41(99.7)]	37.96
High	ENSP00000353625.3	pep chromosome:GRCh38:19:39168611:39179406:1 gene:ENSG00000130669.17 transcript:ENST00000360442.7 gene_biotype:protein_coding transcript_biotype:protein_coding gene_symbol:PAK4 description:p21 (RAC1) activated kinase 4 [Source:HGNC Symbol;Acc:HGNC:16059]	FALSE	TRUE	12.1827	7	21	7	High	High	High	High	Phospho [S104(100); S148(99); S181(97.6); S291(100); S474(100)]	40.21
High	ENSP00000386636.1	pep chromosome:GRCh38:2:169799279:169812064:1 gene:ENSG00000138385.16 transcript:ENST00000409333.1 gene_biotype:protein_coding transcript_biotype:protein_coding gene_symbol:SSB description:small RNA binding exonuclease protection factor La [Source:HGNC Symbol;Acc:HGNC:11316]	FALSE	TRUE	8.33333	4	16	4	High	High	High	High	Phospho [T362(89.9); S366(100)]	40.71
High	ENSP00000361930.3	pep chromosome:GRCh38:20:44885711:44908532:1 gene:ENSG00000166913.13 transcript:ENST00000372839.7 gene_biotype:protein_coding transcript_biotype:protein_coding gene_symbol:YWHAB description:tyrosine 3-monooxygenase/tryptophan 5-monooxygenase activation protein beta [Source:HGNC Symbol;Acc:HGNC:12849]	FALSE	TRUE	29.6748	6	12	2	High	High	High	High	Phospho [S232(85.7)]	45.86
High	ENSP00000498253.1	pep chromosome:GRCh38:17:17042759:17192647:1 gene:ENSG00000133030.21 transcript:ENST00000651222.1 gene_biotype:protein_coding transcript_biotype:protein_coding gene_symbol:MPRIP description:myosin phosphatase Rho interacting protein [Source:HGNC Symbol;Acc:HGNC:30321]	FALSE	TRUE	4.74227	7	16	7	High	High	High	High	Phospho [S220(99.1); S224(99.9); S444(89.6); S737(100); S2364(100); S2380(100)]	33.72
High	ENSP00000420331.1	pep chromosome:GRCh38:3:169966808:169993831:1 gene:ENSG00000008952.17 transcript:ENST00000480708.5 gene_biotype:protein_coding transcript_biotype:protein_coding gene_symbol:SEC62 description:SEC62 homolog, preprotein translocation factor [Source:HGNC Symbol;Acc:HGNC:11846]	FALSE	TRUE	18.0451	7	19	7	High	High	High	High	Phospho [S117(100); T158(95.4); T332(100); S335(100); T343(90.7); S345(98.9); T375(100)]	44.89
High	ENSP00000358081.3	pep chromosome:GRCh38:10:119651370:119677819:1 gene:ENSG00000151929.9 transcript:ENST00000369085.7 gene_biotype:protein_coding transcript_biotype:protein_coding gene_symbol:BAG3 description:BCL2 associated athanogene 3 [Source:HGNC Symbol;Acc:HGNC:939]	FALSE	TRUE	18.7826	7	24	7	High	High	High	High	Phospho [S136(99.9); S173(99.6); S264(100); S275(99.2); S279(100); S289(99.2); T406(100)]	42.58
High	ENSP00000295770.2	pep chromosome:GRCh38:3:31532925:31637616:1 gene:ENSG00000163527.10 transcript:ENST00000295770.4 gene_biotype:protein_coding transcript_biotype:protein_coding gene_symbol:STT3B description:STT3 oligosaccharyltransferase complex catalytic subunit B [Source:HGNC Symbol;Acc:HGNC:30611]	FALSE	TRUE	1.93705	2	20	2	High	High	High	High	Phospho [S498(100); S499(100)]	56
High	ENSP00000312143.9	pep chromosome:GRCh38:7:47275154:47582111:-1 gene:ENSG00000136205.17 transcript:ENST00000311160.14 gene_biotype:protein_coding transcript_biotype:protein_coding gene_symbol:TNS3 description:tensin 3 [Source:HGNC Symbol;Acc:HGNC:21616]	FALSE	TRUE	8.71972	7	17	7	High	High	High	High	Phospho [S332(88.2); S660(98.8); S776(100); S811(100); S850(99.2); S1149(100)]	36.05
High	ENSP00000007390.2	pep chromosome:GRCh38:16:1349240:1351878:-1 gene:ENSG00000007520.4 transcript:ENST00000007390.3 gene_biotype:protein_coding transcript_biotype:protein_coding gene_symbol:TSR3 description:TSR3 ribosome maturation factor [Source:HGNC Symbol;Acc:HGNC:14175]	FALSE	TRUE	11.5385	2	22	2	High	High	High	High	Phospho [T261(94.5); S282(94.8)]	64.42
High	ENSP00000379392.2	pep chromosome:GRCh38:16:20733664:20741818:-1 gene:ENSG00000066654.14 transcript:ENST00000396083.7 gene_biotype:protein_coding transcript_biotype:protein_coding gene_symbol:THUMPD1 description:THUMP domain containing 1 [Source:HGNC Symbol;Acc:HGNC:23807]	FALSE	TRUE	6.79887	4	11	4	High	High	High	High	Phospho [S86(93.3)]	29.81
High	ENSP00000259021.4	pep chromosome:GRCh38:17:49788681:49835026:1 gene:ENSG00000136504.12 transcript:ENST00000259021.9 gene_biotype:protein_coding transcript_biotype:protein_coding gene_symbol:KAT7 description:lysine acetyltransferase 7 [Source:HGNC Symbol;Acc:HGNC:17016]	FALSE	TRUE	6.71031	4	22	4	High	High	High	High	Phospho [S100(83.1)]	45.34
High	ENSP00000243326.4	pep chromosome:GRCh38:2:151409941:151482172:1 gene:ENSG00000080345.18 transcript:ENST00000243326.9 gene_biotype:protein_coding transcript_biotype:protein_coding gene_symbol:RIF1 description:replication timing regulatory factor 1 [Source:HGNC Symbol;Acc:HGNC:23207]	FALSE	TRUE	4.40939	8	11	8	High	High	High	High	Phospho [S782(99.9); S1579(100); S1616(99.2); S1688(100); S2161(99.3); S2172(100); S2196(100); S2393(100)]	32.89
High	ENSP00000315379.6	pep chromosome:GRCh38:1:150321533:150353233:1 gene:ENSG00000117360.13 transcript:ENST00000324862.7 gene_biotype:protein_coding transcript_biotype:protein_coding gene_symbol:PRPF3 description:pre-mRNA processing factor 3 [Source:HGNC Symbol;Acc:HGNC:17348]	FALSE	TRUE	6.88141	5	12	5	High	High	High	High	Phospho [S619(100)]	44.12
High	ENSP00000486746.1	pep chromosome:GRCh38:CHR_HSCHR4_1_CTG9:68313324:68349753:-1 gene:ENSG00000275272.4 transcript:ENST00000627168.2 gene_biotype:protein_coding transcript_biotype:protein_coding gene_symbol:YTHDC1 description:YTH domain containing 1 [Source:HGNC Symbol;Acc:HGNC:30626]	FALSE	TRUE	6.12245	4	29	4	High	High	High	High	Phospho [T148(100); S294(100); S308(100); S326(100)]	51.65
High	ENSP00000491215.1	pep chromosome:GRCh38:1:244850297:244864543:-1 gene:ENSG00000153187.20 transcript:ENST00000640218.2 gene_biotype:protein_coding transcript_biotype:protein_coding gene_symbol:HNRNPU description:heterogeneous nuclear ribonucleoprotein U [Source:HGNC Symbol;Acc:HGNC:5048]	FALSE	TRUE	6.54545	5	40	5	High	High	High	High	Met-loss+Acetyl [N-Term]; Phospho [S4(90.1); S271(100)]	133.5
High	ENSP00000228251.4	pep chromosome:GRCh38:12:10699089:10723323:-1 gene:ENSG00000060138.13 transcript:ENST00000228251.9 gene_biotype:protein_coding transcript_biotype:protein_coding gene_symbol:YBX3 description:Y-box binding protein 3 [Source:HGNC Symbol;Acc:HGNC:2428]	FALSE	TRUE	11.5591	2	25	2	High	High	High	High	Phospho [S370(98.7)]	72.29
High	ENSP00000384939.3	pep chromosome:GRCh38:2:42169461:42330874:1 gene:ENSG00000143924.19 transcript:ENST00000401738.3 gene_biotype:protein_coding transcript_biotype:protein_coding gene_symbol:EML4 description:EMAP like 4 [Source:HGNC Symbol;Acc:HGNC:1316]	FALSE	TRUE	8.56855	6	13	6	High	High	High	High	Phospho [S138(100); S146(99.9); S176(100); T910(99.6); S989(100)]	35.76
High	ENSP00000416959.2	pep chromosome:GRCh38:3:185914558:185938014:-1 gene:ENSG00000136527.18 transcript:ENST00000453386.7 gene_biotype:protein_coding transcript_biotype:protein_coding gene_symbol:TRA2B description:transformer 2 beta homolog [Source:HGNC Symbol;Acc:HGNC:10781]	FALSE	TRUE	13.5417	8	27	5	High	High	High	High	Phospho [S26(100); T33(100); S37(100); S95(100); S97(100); S99(100); S266(97.2)]	21.54
High	ENSP00000497602.1	pep chromosome:GRCh38:1:40979696:41012565:1 gene:ENSG00000171793.16 transcript:ENST00000650070.2 gene_biotype:protein_coding transcript_biotype:protein_coding gene_symbol:CTPS1 description:CTP synthase 1 [Source:HGNC Symbol;Acc:HGNC:2519]	FALSE	TRUE	3.38409	2	62	2	High	High	High	High	Phospho [Y567(82.9); S574(99.7); S575(100)]	146.36
High	ENSP00000307265.3	pep chromosome:GRCh38:19:45883608:45886141:-1 gene:ENSG00000170604.5 transcript:ENST00000302165.5 gene_biotype:protein_coding transcript_biotype:protein_coding gene_symbol:IRF2BP1 description:interferon regulatory factor 2 binding protein 1 [Source:HGNC Symbol;Acc:HGNC:21728]	FALSE	TRUE	14.5548	7	13	7	High	High	High	High	Phospho [S66(100); S384(100); S421(100); S436(100); S453(100)]	26.82
High	ENSP00000348510.4	pep chromosome:GRCh38:16:27460613:27549913:-1 gene:ENSG00000077235.18 transcript:ENST00000356183.9 gene_biotype:protein_coding transcript_biotype:protein_coding gene_symbol:GTF3C1 description:general transcription factor IIIC subunit 1 [Source:HGNC Symbol;Acc:HGNC:4664]	FALSE	TRUE	4.789	6	12	6	High	High	High	High	Phospho [S739(100); S1068(100); S1611(100); S1854(98.5)]	30.57
High	ENSP00000373060.4	pep chromosome:GRCh38:CHR_HSCHR6_MHC_QBL_CTG1:30689327:30707408:-1 gene:ENSG00000206481.11 transcript:ENST00000383566.8 gene_biotype:protein_coding transcript_biotype:protein_coding gene_symbol:MDC1 description:mediator of DNA damage checkpoint 1 [Source:HGNC Symbol;Acc:HGNC:21163]	FALSE	TRUE	7.18047	8	15	8	High	High	High	High	Phospho [S168(100); S453(81); S498(100); S780(100); S793(100); S955(100); S995(100); S998(100)]	39.54
High	ENSP00000271583.3	pep chromosome:GRCh38:1:179882297:179919277:1 gene:ENSG00000143337.18 transcript:ENST00000271583.7 gene_biotype:protein_coding transcript_biotype:protein_coding gene_symbol:TOR1AIP1 description:torsin 1A interacting protein 1 [Source:HGNC Symbol;Acc:HGNC:29456]	FALSE	TRUE	12.187	5	17	5	High	High	High	High	Phospho [S216(87.8); S243(100); S331(98.9)]	38.39
High	ENSP00000449396.1	pep chromosome:GRCh38:12:56162359:56189483:-1 gene:ENSG00000139613.12 transcript:ENST00000550164.6 gene_biotype:protein_coding transcript_biotype:protein_coding gene_symbol:SMARCC2 description:SWI/SNF related, matrix associated, actin dependent regulator of chromatin subfamily c member 2 [Source:HGNC Symbol;Acc:HGNC:11105]	FALSE	TRUE	2.08835	4	13	4	High	High	High	High	Phospho [S283(95.2); S304(100)]	39.27
High	ENSP00000388756.1	pep chromosome:GRCh38:12:22449545:22544409:-1 gene:ENSG00000111731.12 transcript:ENST00000446597.5 gene_biotype:protein_coding transcript_biotype:protein_coding gene_symbol:C2CD5 description:C2 calcium dependent domain containing 5 [Source:HGNC Symbol;Acc:HGNC:29062]	FALSE	TRUE	9.51475	7	25	7	High	High	High	High	Phospho [S260(100); T285(95.5); S295(100); S305(75.6); T314(100); S662(95.6); S903(100)]	59.11
High	ENSP00000234038.6	pep chromosome:GRCh38:2:241150467:241183652:1 gene:ENSG00000115685.15 transcript:ENST00000234038.11 gene_biotype:protein_coding transcript_biotype:protein_coding gene_symbol:PPP1R7 description:protein phosphatase 1 regulatory subunit 7 [Source:HGNC Symbol;Acc:HGNC:9295]	FALSE	TRUE	8.05556	5	19	5	High	High	High	High	Phospho [S12(100); S24(100); S27(100)]	26.53
High	ENSP00000285021.7	pep chromosome:GRCh38:3:14145147:14178783:-1 gene:ENSG00000154767.14 transcript:ENST00000285021.11 gene_biotype:protein_coding transcript_biotype:protein_coding gene_symbol:XPC description:XPC complex subunit, DNA damage recognition and repair factor [Source:HGNC Symbol;Acc:HGNC:12816]	FALSE	TRUE	7.34043	4	16	4	High	High	High	High	Phospho [S94(100); S397(99.9); S398(100); S399(100); S884(99.4)]	52.98
High	ENSP00000384792.1	pep chromosome:GRCh38:19:36054897:36105108:1 gene:ENSG00000075702.18 transcript:ENST00000401500.7 gene_biotype:protein_coding transcript_biotype:protein_coding gene_symbol:WDR62 description:WD repeat domain 62 [Source:HGNC Symbol;Acc:HGNC:24502]	FALSE	TRUE	9.58634	9	21	9	High	High	High	High	Phospho [S49(88.4); S1070(96.1); S1128(100); Y1147(87.2); S1231(93.2); S1410(88.7)]	34.92
High	ENSP00000215582.4	pep chromosome:GRCh38:19:751112:764318:1 gene:ENSG00000099812.9 transcript:ENST00000215582.8 gene_biotype:protein_coding transcript_biotype:protein_coding gene_symbol:MISP description:mitotic spindle positioning [Source:HGNC Symbol;Acc:HGNC:27000]	FALSE	TRUE	15.0221	7	19	7	High	High	High	High	Phospho [S214(94.5); S376(94.2); S460(99.8); S575(100); S675(100)]	47.39
High	ENSP00000216832.4	pep chromosome:GRCh38:14:39175254:39183220:1 gene:ENSG00000100941.9 transcript:ENST00000216832.9 gene_biotype:protein_coding transcript_biotype:protein_coding gene_symbol:PNN description:pinin, desmosome associated protein [Source:HGNC Symbol;Acc:HGNC:9162]	FALSE	TRUE	14.5049	10	14	10	High	High	High	High	Phospho [S100(100); S347(100); S381(99.7); S417(100); S658(95.2); S690(100)]	38
High	ENSP00000483316.1	pep chromosome:GRCh38:CHR_HSCHR16_1_CTG1:16034737:16228097:1 gene:ENSG00000278183.4 transcript:ENST00000621144.4 gene_biotype:protein_coding transcript_biotype:protein_coding gene_symbol:ABCC1 description:ATP binding cassette subfamily C member 1 [Source:HGNC Symbol;Acc:HGNC:51]	FALSE	TRUE	1.5676	2	38	2	High	High	High	High	Phospho [S921(87.3); S930(96.9)]	66.71
High	ENSP00000346196.2	pep chromosome:GRCh38:21:42893309:42913299:1 gene:ENSG00000160194.18 transcript:ENST00000354250.7 gene_biotype:protein_coding transcript_biotype:protein_coding gene_symbol:NDUFV3 description:NADH:ubiquinone oxidoreductase subunit V3 [Source:HGNC Symbol;Acc:HGNC:7719]	FALSE	TRUE	9.09091	4	25	4	High	High	High	High	Phospho [S159(78.2); S466(93.4)]	34.39
High	ENSP00000215793.7	pep chromosome:GRCh38:22:30331988:30356894:-1 gene:ENSG00000099995.19 transcript:ENST00000215793.13 gene_biotype:protein_coding transcript_biotype:protein_coding gene_symbol:SF3A1 description:splicing factor 3a subunit 1 [Source:HGNC Symbol;Acc:HGNC:10765]	FALSE	TRUE	6.43127	2	9	2	High	High	High	High	Phospho [S329(100); S359(100)]	40.83
High	ENSP00000355500.1	pep chromosome:GRCh38:1:243124428:243255281:-1 gene:ENSG00000143702.16 transcript:ENST00000366542.6 gene_biotype:protein_coding transcript_biotype:protein_coding gene_symbol:CEP170 description:centrosomal protein 170 [Source:HGNC Symbol;Acc:HGNC:28920]	FALSE	TRUE	8.71212	9	14	9	High	High	High	High	Phospho [S379(100); S446(99.7); S627(91.5); S630(91.5); T840(89.6); S1079(88.3); S1112(100); S1165(99.9); S1529(84.2)]	34.82
High	ENSP00000467864.1	pep chromosome:GRCh38:19:3728376:3750813:1 gene:ENSG00000105289.15 transcript:ENST00000587686.1 gene_biotype:protein_coding transcript_biotype:protein_coding gene_symbol:TJP3 description:tight junction protein 3 [Source:HGNC Symbol;Acc:HGNC:11829]	FALSE	TRUE	7.46269	7	12	7	High	High	High	High	Phospho [S131(100); S338(100); S365(100); S875(100)]	32.8
High	ENSP00000404121.1	pep chromosome:GRCh38:19:10654261:10692417:1 gene:ENSG00000129351.17 transcript:ENST00000449870.5 gene_biotype:protein_coding transcript_biotype:protein_coding gene_symbol:ILF3 description:interleukin enhancer binding factor 3 [Source:HGNC Symbol;Acc:HGNC:6038]	FALSE	TRUE	10.6904	6	24	6	High	High	High	High	Phospho [S382(100); T486(82); T596(100)]	36.8
High	ENSP00000262613.5	pep chromosome:GRCh38:17:74748628:74769353:1 gene:ENSG00000109062.12 transcript:ENST00000262613.10 gene_biotype:protein_coding transcript_biotype:protein_coding gene_symbol:SLC9A3R1 description:SLC9A3 regulator 1 [Source:HGNC Symbol;Acc:HGNC:11075]	FALSE	TRUE	9.77654	2	38	2	High	High	High	High	Phospho [S280(100)]	79.36
High	ENSP00000263102.6	pep chromosome:GRCh38:10:59788747:59906556:-1 gene:ENSG00000108091.11 transcript:ENST00000263102.7 gene_biotype:protein_coding transcript_biotype:protein_coding gene_symbol:CCDC6 description:coiled-coil domain containing 6 [Source:HGNC Symbol;Acc:HGNC:18782]	FALSE	TRUE	7.59494	5	21	5	High	High	High	High	Phospho [S240(100); S244(100); S323(99.7); S419(100)]	35.51
High	ENSP00000420213.1	pep chromosome:GRCh38:3:58008400:58170774:1 gene:ENSG00000136068.14 transcript:ENST00000490882.5 gene_biotype:protein_coding transcript_biotype:protein_coding gene_symbol:FLNB description:filamin B [Source:HGNC Symbol;Acc:HGNC:3755]	FALSE	TRUE	3.11432	6	13	6	High	High	High	High	Phospho [S1474(100); S1536(100); S2138(99.6); S2509(99.7)]	30.45
High	ENSP00000238256.3	pep chromosome:GRCh38:9:113161006:113221277:-1 gene:ENSG00000119321.9 transcript:ENST00000238256.8 gene_biotype:protein_coding transcript_biotype:protein_coding gene_symbol:FKBP15 description:FKBP prolyl isomerase 15 [Source:HGNC Symbol;Acc:HGNC:23397]	FALSE	TRUE	10.2543	5	19	5	High	High	High	High	Phospho [S956(100); S979(99); S1114(100); S1162(99.8)]	45.37
High	ENSP00000498803.1	pep chromosome:GRCh38:19:10553085:10566026:-1 gene:ENSG00000129347.21 transcript:ENST00000652042.1 gene_biotype:protein_coding transcript_biotype:protein_coding gene_symbol:KRI1 description:KRI1 homolog [Source:HGNC Symbol;Acc:HGNC:25769]	FALSE	TRUE	13.6812	4	29	4	High	High	High	High	Phospho [S58(89.4); S103(100); S177(100); S645(99.9)]	52.02
High	ENSP00000282120.3	pep chromosome:GRCh38:2:85318020:85328296:-1 gene:ENSG00000152291.14 transcript:ENST00000282120.6 gene_biotype:protein_coding transcript_biotype:protein_coding gene_symbol:TGOLN2 description:trans-golgi network protein 2 [Source:HGNC Symbol;Acc:HGNC:15450]	FALSE	TRUE	9.81211	4	41	4	High	High	High	High	Phospho [S71(99.6)]	51.59
High	ENSP00000323687.6	pep chromosome:GRCh38:17:76389456:76453152:-1 gene:ENSG00000175931.13 transcript:ENST00000319380.12 gene_biotype:protein_coding transcript_biotype:protein_coding gene_symbol:UBE2O description:ubiquitin conjugating enzyme E2 O [Source:HGNC Symbol;Acc:HGNC:29554]	FALSE	TRUE	6.73375	7	10	7	High	High	High	High	Phospho [S87(100); S89(100); S115(100); S401(94); S896(100)]	22.22
High	ENSP00000432016.1	pep chromosome:GRCh38:5:140401908:140549569:1 gene:ENSG00000254996.5 transcript:ENST00000532219.5 gene_biotype:protein_coding transcript_biotype:protein_coding gene_symbol:ANKHD1-EIF4EBP3 description:ANKHD1-EIF4EBP3 readthrough [Source:HGNC Symbol;Acc:HGNC:33530]	FALSE	TRUE	3.43905	4	15	4	High	High	High	High	Phospho [S1591(100); T1678(95.2); S2598(99.4)]	33.03
High	ENSP00000422626.1	pep chromosome:GRCh38:4:112637126:112657586:1 gene:ENSG00000174720.16 transcript:ENST00000509061.5 gene_biotype:protein_coding transcript_biotype:protein_coding gene_symbol:LARP7 description:La ribonucleoprotein domain family member 7 [Source:HGNC Symbol;Acc:HGNC:24912]	FALSE	TRUE	7.80985	4	23	4	High	High	High	High	Phospho [S268(100)]	31.01
High	ENSP00000351811.5	pep chromosome:GRCh38:16:67873052:67884499:1 gene:ENSG00000038358.15 transcript:ENST00000358933.10 gene_biotype:protein_coding transcript_biotype:protein_coding gene_symbol:EDC4 description:enhancer of mRNA decapping 4 [Source:HGNC Symbol;Acc:HGNC:17157]	FALSE	TRUE	7.06638	4	16	4	High	High	High	High	Phospho [S723(90.8); S844(99.9); S879(99.9)]	31.43
High	ENSP00000425721.1	pep chromosome:GRCh38:5:96662074:96771679:1 gene:ENSG00000153113.23 transcript:ENST00000508830.5 gene_biotype:protein_coding transcript_biotype:protein_coding gene_symbol:CAST description:calpastatin [Source:HGNC Symbol;Acc:HGNC:1515]	FALSE	TRUE	16.0556	8	12	4	High	High	High	High	Phospho [S34(99.6); S51(93.9); S326(99.8)]	25.62
High	ENSP00000480421.1	pep chromosome:GRCh38:7:100875103:100888664:1 gene:ENSG00000087087.20 transcript:ENST00000611405.5 gene_biotype:protein_coding transcript_biotype:protein_coding gene_symbol:SRRT description:serrate, RNA effector molecule [Source:HGNC Symbol;Acc:HGNC:24101]	FALSE	TRUE	8.10502	9	25	4	High	High	High	High	Phospho [S26(100); S67(100); S74(100); S319(90.1); S493(100); T544(98.9)]	35.8
High	ENSP00000405514.1	pep chromosome:GRCh38:7:94907594:95296400:1 gene:ENSG00000158528.12 transcript:ENST00000433360.6 gene_biotype:protein_coding transcript_biotype:protein_coding gene_symbol:PPP1R9A description:protein phosphatase 1 regulatory subunit 9A [Source:HGNC Symbol;Acc:HGNC:14946]	FALSE	TRUE	3.85735	3	17	3	High	High	High	High	Phospho [S199(91.5); S862(99.8); S937(100)]	32.67
High	ENSP00000433548.3	pep chromosome:GRCh38:12:752923:911451:1 gene:ENSG00000060237.17 transcript:ENST00000530271.6 gene_biotype:protein_coding transcript_biotype:protein_coding gene_symbol:WNK1 description:WNK lysine deficient protein kinase 1 [Source:HGNC Symbol;Acc:HGNC:14540]	FALSE	TRUE	2.54148	7	15	7	High	High	High	High	Phospho [T60(91.4); S167(99.4); S185(92.7); S378(100); S1674(100); S2445(100)]	21.5
High	ENSP00000429824.1	pep chromosome:GRCh38:5:157787405:157859143:-1 gene:ENSG00000113282.13 transcript:ENST00000523908.5 gene_biotype:protein_coding transcript_biotype:protein_coding gene_symbol:CLINT1 description:clathrin interactor 1 [Source:HGNC Symbol;Acc:HGNC:23186]	FALSE	TRUE	2.64386	6	17	6	High	High	High	High	Phospho [S227(100); S232(100); S234(100)]	38.57
High	ENSP00000489840.1	pep chromosome:GRCh38:12:120212314:120265629:-1 gene:ENSG00000089159.16 transcript:ENST00000637617.1 gene_biotype:protein_coding transcript_biotype:protein_coding gene_symbol:PXN description:paxillin [Source:HGNC Symbol;Acc:HGNC:9718]	FALSE	TRUE	9.62072	6	14	6	High	High	High	High	Phospho [S85(99.2); S106(99.3); S137(98.6); S250(91.2); S258(100)]	30.65
High	ENSP00000415576.2	pep chromosome:GRCh38:4:94207845:94290821:1 gene:ENSG00000163104.17 transcript:ENST00000457823.6 gene_biotype:protein_coding transcript_biotype:protein_coding gene_symbol:SMARCAD1 description:SWI/SNF-related, matrix-associated actin-dependent regulator of chromatin, subfamily a, containing DEAD/H box 1 [Source:HGNC Symbol;Acc:HGNC:18398]	FALSE	TRUE	11.965	6	14	6	High	High	High	High	Phospho [S57(100); S66(97.7); S67(98); S124(88.1); S239(100); S242(100)]	39.14
High	ENSP00000365625.3	pep chromosome:GRCh38:6:30653127:30673006:-1 gene:ENSG00000204560.10 transcript:ENST00000376442.8 gene_biotype:protein_coding transcript_biotype:protein_coding gene_symbol:DHX16 description:DEAH-box helicase 16 [Source:HGNC Symbol;Acc:HGNC:2739]	FALSE	TRUE	4.51489	3	24	3	High	High	High	High	Phospho [S103(99.9); S160(100)]	79.68
High	ENSP00000267812.3	pep chromosome:GRCh38:15:43804492:43824690:-1 gene:ENSG00000140259.7 transcript:ENST00000267812.4 gene_biotype:protein_coding transcript_biotype:protein_coding gene_symbol:MFAP1 description:microfibril associated protein 1 [Source:HGNC Symbol;Acc:HGNC:7032]	FALSE	TRUE	19.3622	5	7	5	High	High	High	High	Phospho [S80(84.6); S116(100); S132(100); S133(100); T267(100)]	32.49
High	ENSP00000304669.7	pep chromosome:GRCh38:5:138753425:138935034:1 gene:ENSG00000044115.21 transcript:ENST00000302763.12 gene_biotype:protein_coding transcript_biotype:protein_coding gene_symbol:CTNNA1 description:catenin alpha 1 [Source:HGNC Symbol;Acc:HGNC:2509]	FALSE	TRUE	4.08389	3	17	3	High	High	High	High	Phospho [S641(100); T654(90.3)]	49.35
High	ENSP00000293760.5	pep chromosome:GRCh38:6:33771213:33789130:-1 gene:ENSG00000161904.12 transcript:ENST00000293760.10 gene_biotype:protein_coding transcript_biotype:protein_coding gene_symbol:LEMD2 description:LEM domain containing 2 [Source:HGNC Symbol;Acc:HGNC:21244]	FALSE	TRUE	6.16302	4	17	4	High	High	High	High	Phospho [S134(100); S138(100); S139(100); S499(90.8)]	27.39
High	ENSP00000357110.2	pep chromosome:GRCh38:6:130839352:131063318:-1 gene:ENSG00000079819.19 transcript:ENST00000368128.6 gene_biotype:protein_coding transcript_biotype:protein_coding gene_symbol:EPB41L2 description:erythrocyte membrane protein band 4.1 like 2 [Source:HGNC Symbol;Acc:HGNC:3379]	FALSE	TRUE	5.37313	5	11	5	High	High	High	High	Phospho [S39(100); S58(99.7); S87(84.2); S715(100); S718(100)]	27.04
High	ENSP00000483667.1	pep chromosome:GRCh38:5:98853985:98928957:-1 gene:ENSG00000153922.10 transcript:ENST00000614616.4 gene_biotype:protein_coding transcript_biotype:protein_coding gene_symbol:CHD1 description:chromodomain helicase DNA binding protein 1 [Source:HGNC Symbol;Acc:HGNC:1915]	FALSE	TRUE	3.45029	5	14	5	High	High	High	High	Phospho [S180(99.8); S215(94.4); Y1095(93.2); S1100(100); S1673(98.8)]	29.41
High	ENSP00000351100.5	pep chromosome:GRCh38:5:140664676:140672345:1 gene:ENSG00000120314.18 transcript:ENST00000358337.9 gene_biotype:protein_coding transcript_biotype:protein_coding gene_symbol:WDR55 description:WD repeat domain 55 [Source:HGNC Symbol;Acc:HGNC:25971]	FALSE	TRUE	11.4883	2	12	2	High	High	High	High	Phospho [S14(100); S382(100)]	41.79
High	ENSP00000348984.4	pep chromosome:GRCh38:21:33543038:33577514:1 gene:ENSG00000159140.20 transcript:ENST00000356577.9 gene_biotype:protein_coding transcript_biotype:protein_coding gene_symbol:SON description:SON DNA binding protein [Source:HGNC Symbol;Acc:HGNC:11183]	FALSE	TRUE	4.28689	6	12	6	High	High	High	High	Phospho [S283(95.5); S1556(100); S1697(100); S1769(92.7); S2129(100)]	30.16
High	ENSP00000479320.1	pep chromosome:GRCh38:12:6556870:6568332:-1 gene:ENSG00000111641.11 transcript:ENST00000620535.4 gene_biotype:protein_coding transcript_biotype:protein_coding gene_symbol:NOP2 description:NOP2 nucleolar protein [Source:HGNC Symbol;Acc:HGNC:7867]	FALSE	TRUE	8.04734	4	17	4	High	High	High	High	Phospho [S67(99.7); S214(99.8); S765(100); S819(99.2)]	34.46
High	ENSP00000255194.6	pep chromosome:GRCh38:5:78000525:78294755:-1 gene:ENSG00000132842.13 transcript:ENST00000255194.10 gene_biotype:protein_coding transcript_biotype:protein_coding gene_symbol:AP3B1 description:adaptor related protein complex 3 subunit beta 1 [Source:HGNC Symbol;Acc:HGNC:566]	FALSE	TRUE	2.3766	4	14	4	High	High	High	High	Phospho [S750(100)]	12.79
High	ENSP00000378338.3	pep chromosome:GRCh38:17:29573475:29589549:-1 gene:ENSG00000108262.15 transcript:ENST00000394869.7 gene_biotype:protein_coding transcript_biotype:protein_coding gene_symbol:GIT1 description:GIT ArfGAP 1 [Source:HGNC Symbol;Acc:HGNC:4272]	FALSE	TRUE	8.31169	3	14	3	High	High	High	High	Phospho [Y246(100); S255(100); S397(99.9); S601(91.7)]	50.53
High	ENSP00000358064.4	pep chromosome:GRCh38:1:150364711:150473556:1 gene:ENSG00000163125.15 transcript:ENST00000369068.4 gene_biotype:protein_coding transcript_biotype:protein_coding gene_symbol:RPRD2 description:regulation of nuclear pre-mRNA domain containing 2 [Source:HGNC Symbol;Acc:HGNC:29039]	FALSE	TRUE	8.14511	7	19	7	High	High	High	High	Phospho [T358(99.8); S374(100); T664(79.6); T723(100); S769(88.5)]	37.87
High	ENSP00000325240.6	pep chromosome:GRCh38:17:38870058:38921770:1 gene:ENSG00000002834.18 transcript:ENST00000318008.11 gene_biotype:protein_coding transcript_biotype:protein_coding gene_symbol:LASP1 description:LIM and SH3 protein 1 [Source:HGNC Symbol;Acc:HGNC:6513]	FALSE	TRUE	14.1762	5	16	5	High	High	High	High	Phospho [S146(99.2)]	30.83
High	ENSP00000484285.1	pep chromosome:GRCh38:10:49819334:49941985:-1 gene:ENSG00000227345.8 transcript:ENST00000616448.1 gene_biotype:protein_coding transcript_biotype:protein_coding gene_symbol:PARG description:poly(ADP-ribose) glycohydrolase [Source:HGNC Symbol;Acc:HGNC:8605]	FALSE	TRUE	9.11885	4	7	4	High	High	High	High	Phospho [S137(100); T199(95.4); S302(99.7); S316(100)]	27.72
High	ENSP00000222329.3	pep chromosome:GRCh38:19:42247569:42255128:-1 gene:ENSG00000105722.10 transcript:ENST00000222329.9 gene_biotype:protein_coding transcript_biotype:protein_coding gene_symbol:ERF description:ETS2 repressor factor [Source:HGNC Symbol;Acc:HGNC:3444]	FALSE	TRUE	10.7664	3	14	3	High	High	High	High	Phospho [S24(98.4); S185(93.3); T526(100)]	38.31
High	ENSP00000202816.1	pep chromosome:GRCh38:20:13714322:13784886:-1 gene:ENSG00000089048.14 transcript:ENST00000202816.5 gene_biotype:protein_coding transcript_biotype:protein_coding gene_symbol:ESF1 description:ESF1 nucleolar pre-rRNA processing protein homolog [Source:HGNC Symbol;Acc:HGNC:15898]	FALSE	TRUE	9.51821	6	17	6	High	High	High	High	Phospho [S77(98.9); S153(100); S198(100); S663(100); S694(99.7)]	32.79
High	ENSP00000264605.3	pep chromosome:GRCh38:2:237487251:237555322:1 gene:ENSG00000115648.14 transcript:ENST00000264605.8 gene_biotype:protein_coding transcript_biotype:protein_coding gene_symbol:MLPH description:melanophilin [Source:HGNC Symbol;Acc:HGNC:29643]	FALSE	TRUE	13.3333	4	15	4	High	High	High	High	Phospho [T165(87.4); S339(99.5); S463(100)]	36.21
High	ENSP00000393316.2	pep chromosome:GRCh38:14:51240247:51257655:1 gene:ENSG00000139921.13 transcript:ENST00000457354.7 gene_biotype:protein_coding transcript_biotype:protein_coding gene_symbol:TMX1 description:thioredoxin related transmembrane protein 1 [Source:HGNC Symbol;Acc:HGNC:15487]	FALSE	TRUE	7.5	2	12	2	High	High	High	High	Phospho [S247(100)]	52.61
High	ENSP00000362993.3	pep chromosome:GRCh38:10:58512872:58831435:1 gene:ENSG00000122870.12 transcript:ENST00000373886.8 gene_biotype:protein_coding transcript_biotype:protein_coding gene_symbol:BICC1 description:BicC family RNA binding protein 1 [Source:HGNC Symbol;Acc:HGNC:19351]	FALSE	TRUE	7.70021	5	10	5	High	High	High	High	Phospho [S26(99.5); S633(99.8); S679(93.8); S803(90.2)]	31.85
High	ENSP00000362727.2	pep chromosome:GRCh38:9:123379654:123930107:-1 gene:ENSG00000119522.16 transcript:ENST00000373624.6 gene_biotype:protein_coding transcript_biotype:protein_coding gene_symbol:DENND1A description:DENN domain containing 1A [Source:HGNC Symbol;Acc:HGNC:29324]	FALSE	TRUE	4.9554	5	11	5	High	High	High	High	Phospho [S473(100); Y530(98.4); S536(99.9); S592(100)]	36.02
High	ENSP00000425556.1	pep chromosome:GRCh38:4:168497052:168928441:1 gene:ENSG00000129116.19 transcript:ENST00000505667.6 gene_biotype:protein_coding transcript_biotype:protein_coding gene_symbol:PALLD description:palladin, cytoskeletal associated protein [Source:HGNC Symbol;Acc:HGNC:17068]	FALSE	TRUE	2.40427	3	16	3	High	High	High	High	Phospho [S669(100); S914(99.7)]	41.45
High	ENSP00000319829.5	pep chromosome:GRCh38:1:151282312:151291903:1 gene:ENSG00000143373.18 transcript:ENST00000324048.9 gene_biotype:protein_coding transcript_biotype:protein_coding gene_symbol:ZNF687 description:zinc finger protein 687 [Source:HGNC Symbol;Acc:HGNC:29277]	FALSE	TRUE	7.51819	5	12	5	High	High	High	High	Phospho [S253(99.4); S266(100); S271(100); S275(100); S1057(100); S1082(98); S1083(98)]	30.36
High	ENSP00000251496.2	pep chromosome:GRCh38:4:17810979:17844865:1 gene:ENSG00000109805.10 transcript:ENST00000251496.7 gene_biotype:protein_coding transcript_biotype:protein_coding gene_symbol:NCAPG description:non-SMC condensin I complex subunit G [Source:HGNC Symbol;Acc:HGNC:24304]	FALSE	TRUE	4.82759	3	10	3	High	High	High	High	Phospho [S674(100); S975(99.3)]	35.92
High	ENSP00000351207.3	pep chromosome:GRCh38:22:25027974:25197444:1 gene:ENSG00000197077.13 transcript:ENST00000358431.7 gene_biotype:protein_coding transcript_biotype:protein_coding gene_symbol:KIAA1671 description:KIAA1671 [Source:HGNC Symbol;Acc:HGNC:29345]	FALSE	TRUE	4.98339	8	12	8	High	High	High	High	Phospho [T600(100); S749(100); S1224(100); S1366(100); S1499(92.9); S1695(100); S1701(100)]	21.32
High	ENSP00000413964.3	pep chromosome:GRCh38:19:34172568:34229288:1 gene:ENSG00000257103.8 transcript:ENST00000433627.9 gene_biotype:protein_coding transcript_biotype:protein_coding gene_symbol:LSM14A description:LSM14A mRNA processing body assembly factor [Source:HGNC Symbol;Acc:HGNC:24489]	FALSE	TRUE	10.3672	6	16	6	High	High	High	High	Phospho [S183(93.2); S192(99.9); S216(100)]	18.32
High	ENSP00000366672.3	pep chromosome:GRCh38:20:18587893:18763917:1 gene:ENSG00000125821.12 transcript:ENST00000377452.3 gene_biotype:protein_coding transcript_biotype:protein_coding gene_symbol:DTD1 description:D-aminoacyl-tRNA deacylase 1 [Source:HGNC Symbol;Acc:HGNC:16219]	FALSE	TRUE	11.9617	3	23	3	High	High	High	High	Phospho [S205(100)]	49.4
High	ENSP00000312625.5	pep chromosome:GRCh38:1:20742679:20786652:-1 gene:ENSG00000127483.18 transcript:ENST00000312239.10 gene_biotype:protein_coding transcript_biotype:protein_coding gene_symbol:HP1BP3 description:heterochromatin protein 1 binding protein 3 [Source:HGNC Symbol;Acc:HGNC:24973]	FALSE	TRUE	9.22242	3	20	3	High	High	High	High	Phospho [T51(89.8)]	30.86
High	ENSP00000377969.3	pep chromosome:GRCh38:19:6379572:6393164:-1 gene:ENSG00000125651.14 transcript:ENST00000394456.10 gene_biotype:protein_coding transcript_biotype:protein_coding gene_symbol:GTF2F1 description:general transcription factor IIF subunit 1 [Source:HGNC Symbol;Acc:HGNC:4652]	FALSE	TRUE	15.4739	4	9	4	High	High	High	High	Phospho [S224(100); S311(93.7); T331(100); T389(100)]	31.88
High	ENSP00000391249.1	pep chromosome:GRCh38:17:77281499:77500593:1 gene:ENSG00000184640.18 transcript:ENST00000427177.6 gene_biotype:protein_coding transcript_biotype:protein_coding gene_symbol:SEPTIN9 description:septin 9 [Source:HGNC Symbol;Acc:HGNC:7323]	FALSE	TRUE	4.77816	3	11	3	High	High	High	High	Phospho [S30(100); S85(100)]	43.47
High	ENSP00000382004.4	pep chromosome:GRCh38:11:57761797:57819178:1 gene:ENSG00000198561.13 transcript:ENST00000399050.8 gene_biotype:protein_coding transcript_biotype:protein_coding gene_symbol:CTNND1 description:catenin delta 1 [Source:HGNC Symbol;Acc:HGNC:2515]	FALSE	TRUE	12.6033	9	12	9	High	High	High	High	Phospho [S230(89.4); S252(99.3); S288(99.8); T310(99.4); S352(100); S864(80.6); S920(100)]	18.94
High	ENSP00000355464.1	pep chromosome:GRCh38:1:246839098:246931363:-1 gene:ENSG00000153207.15 transcript:ENST00000366508.5 gene_biotype:protein_coding transcript_biotype:protein_coding gene_symbol:AHCTF1 description:AT-hook containing transcription factor 1 [Source:HGNC Symbol;Acc:HGNC:24618]	FALSE	TRUE	4.47631	8	11	8	High	High	High	High	Phospho [S1195(100); S1257(99.9); S1267(100); S1332(100); S1548(80.8); S1568(100); S1576(100); S1979(93.2)]	32.17
High	ENSP00000316527.3	pep chromosome:GRCh38:15:64499292:64686068:1 gene:ENSG00000180357.9 transcript:ENST00000326648.4 gene_biotype:protein_coding transcript_biotype:protein_coding gene_symbol:ZNF609 description:zinc finger protein 609 [Source:HGNC Symbol;Acc:HGNC:29003]	FALSE	TRUE	6.80369	8	18	8	High	High	High	High	Phospho [S358(94.2); S491(100); S578(99.3); T746(91.9); S846(99.5); S849(100); S1055(92); S1285(93.4)]	36.83
High	ENSP00000490709.1	pep chromosome:GRCh38:16:28456371:28492041:-1 gene:ENSG00000261832.6 transcript:ENST00000635887.1 gene_biotype:protein_coding transcript_biotype:nonsense_mediated_decay gene_symbol:AC138894.1 description:novel protein	FALSE	TRUE	3.65297	3	9	3	High	High	High	High	Phospho [S12(100)]	25.88
High	ENSP00000365745.3	pep chromosome:GRCh38:11:70398541:70436579:1 gene:ENSG00000085733.16 transcript:ENST00000376561.7 gene_biotype:protein_coding transcript_biotype:protein_coding gene_symbol:CTTN description:cortactin [Source:HGNC Symbol;Acc:HGNC:3338]	FALSE	TRUE	5.04732	3	24	3	High	High	High	High	Phospho [T364(99.8); S381(99.8)]	71.91
High	ENSP00000351015.4	pep chromosome:GRCh38:17:31094927:31377677:1 gene:ENSG00000196712.17 transcript:ENST00000358273.8 gene_biotype:protein_coding transcript_biotype:protein_coding gene_symbol:NF1 description:neurofibromin 1 [Source:HGNC Symbol;Acc:HGNC:7765]	FALSE	TRUE	2.14864	4	9	4	High	High	High	High	Phospho [S2515(100); T2565(99.8); S2597(93.6); S2817(95.2)]	22.23
High	ENSP00000449207.1	pep chromosome:GRCh38:12:54241755:54259545:-1 gene:ENSG00000094916.16 transcript:ENST00000550411.5 gene_biotype:protein_coding transcript_biotype:protein_coding gene_symbol:CBX5 description:chromobox 5 [Source:HGNC Symbol;Acc:HGNC:1555]	FALSE	TRUE	8.90052	1	61	1	High	High	High	High	Phospho [S12(99.6); S13(94.1)]	114.61
High	ENSP00000376679.3	pep chromosome:GRCh38:10:114431113:114526931:-1 gene:ENSG00000099204.20 transcript:ENST00000392952.7 gene_biotype:protein_coding transcript_biotype:protein_coding gene_symbol:ABLIM1 description:actin binding LIM protein 1 [Source:HGNC Symbol;Acc:HGNC:78]	FALSE	TRUE	13.6264	6	20	6	High	High	High	High	Phospho [S134(99.9); S185(100); S263(93.7); S332(90.4)]	32.24
High	ENSP00000325827.7	pep chromosome:GRCh38:9:136440097:136477689:-1 gene:ENSG00000148396.18 transcript:ENST00000313050.11 gene_biotype:protein_coding transcript_biotype:protein_coding gene_symbol:SEC16A description:SEC16 homolog A, endoplasmic reticulum export factor [Source:HGNC Symbol;Acc:HGNC:29006]	FALSE	TRUE	4.7518	6	13	6	High	High	High	High	Phospho [S314(100); S342(100); S569(93.7); S1964(100); S2083(100)]	37.24
High	ENSP00000460871.1	pep chromosome:GRCh38:16:11833850:11851542:-1 gene:ENSG00000171490.13 transcript:ENST00000571133.6 gene_biotype:protein_coding transcript_biotype:protein_coding gene_symbol:RSL1D1 description:ribosomal L1 domain containing 1 [Source:HGNC Symbol;Acc:HGNC:24534]	FALSE	TRUE	9.79592	5	18	5	High	High	High	High	Phospho [T340(100); S427(100); S443(98.9)]	22.83
High	ENSP00000477551.1	pep chromosome:GRCh38:6:2765432:2785744:1 gene:ENSG00000124535.16 transcript:ENST00000618555.4 gene_biotype:protein_coding transcript_biotype:protein_coding gene_symbol:WRNIP1 description:WRN helicase interacting protein 1 [Source:HGNC Symbol;Acc:HGNC:20876]	FALSE	TRUE	10.9774	6	10	6	High	High	High	High	Phospho [S65(100); S77(94.6); S92(99.1); T116(98.4); S153(100)]	20.55
High	ENSP00000301242.3	pep chromosome:GRCh38:19:38251237:38256374:-1 gene:ENSG00000167641.11 transcript:ENST00000301242.9 gene_biotype:protein_coding transcript_biotype:protein_coding gene_symbol:PPP1R14A description:protein phosphatase 1 regulatory inhibitor subunit 14A [Source:HGNC Symbol;Acc:HGNC:14871]	FALSE	TRUE	23.1293	4	19	4	High	High	High	High	Phospho [S18(92.7); S26(100); S134(100); S136(100)]	52.56
High	ENSP00000287169.3	pep chromosome:GRCh38:11:57668114:57701182:1 gene:ENSG00000156599.11 transcript:ENST00000287169.8 gene_biotype:protein_coding transcript_biotype:protein_coding gene_symbol:ZDHHC5 description:zinc finger DHHC-type containing 5 [Source:HGNC Symbol;Acc:HGNC:18472]	FALSE	TRUE	18.4615	8	19	8	High	High	High	High	Phospho [S296(87.5); S380(99.8); S409(91.4); S529(100); S554(100); S590(90.1)]	21.89
High	ENSP00000356436.3	pep chromosome:GRCh38:1:186828949:186988981:1 gene:ENSG00000116711.10 transcript:ENST00000367466.4 gene_biotype:protein_coding transcript_biotype:protein_coding gene_symbol:PLA2G4A description:phospholipase A2 group IVA [Source:HGNC Symbol;Acc:HGNC:9035]	FALSE	TRUE	2.4032	1	15	1	High	High	High	High	Phospho [S437(100)]	54.59
High	ENSP00000302239.4	pep chromosome:GRCh38:15:50424405:50514421:1 gene:ENSG00000138592.14 transcript:ENST00000307179.9 gene_biotype:protein_coding transcript_biotype:protein_coding gene_symbol:USP8 description:ubiquitin specific peptidase 8 [Source:HGNC Symbol;Acc:HGNC:12631]	FALSE	TRUE	2.32558	4	16	4	High	High	High	High	Phospho [T577(100); S718(99.3)]	26.03
High	ENSP00000271526.4	pep chromosome:GRCh38:1:156767535:156800815:1 gene:ENSG00000143294.15 transcript:ENST00000271526.9 gene_biotype:protein_coding transcript_biotype:protein_coding gene_symbol:PRCC description:proline rich mitotic checkpoint control factor [Source:HGNC Symbol;Acc:HGNC:9343]	FALSE	TRUE	11.8126	5	11	5	High	High	High	High	Phospho [S157(89.7); S267(100)]	27.45
High	ENSP00000263277.2	pep chromosome:GRCh38:19:47713422:47743134:1 gene:ENSG00000024422.12 transcript:ENST00000263277.8 gene_biotype:protein_coding transcript_biotype:protein_coding gene_symbol:EHD2 description:EH domain containing 2 [Source:HGNC Symbol;Acc:HGNC:3243]	FALSE	TRUE	8.10313	3	13	3	High	High	High	High	Phospho [S438(100); S468(86.3)]	45.12
High	ENSP00000431696.1	pep chromosome:GRCh38:11:65855241:65861421:-1 gene:ENSG00000172757.13 transcript:ENST00000534769.5 gene_biotype:protein_coding transcript_biotype:protein_coding gene_symbol:CFL1 description:cofilin 1 [Source:HGNC Symbol;Acc:HGNC:1874]	FALSE	TRUE	26.9608	6	14	6	High	High	High	High	Phospho [S62(95.2)]	18.91
High	ENSP00000238497.4	pep chromosome:GRCh38:18:63389190:63422476:-1 gene:ENSG00000119541.10 transcript:ENST00000238497.10 gene_biotype:protein_coding transcript_biotype:protein_coding gene_symbol:VPS4B description:vacuolar protein sorting 4 homolog B [Source:HGNC Symbol;Acc:HGNC:10895]	FALSE	TRUE	5.85586	3	11	3	High	High	High	High	Phospho [S102(99.9)]	46.58
High	ENSP00000480350.1	pep chromosome:GRCh38:16:4696510:4730167:-1 gene:ENSG00000168096.15 transcript:ENST00000614075.4 gene_biotype:protein_coding transcript_biotype:protein_coding gene_symbol:ANKS3 description:ankyrin repeat and sterile alpha motif domain containing 3 [Source:HGNC Symbol;Acc:HGNC:29422]	FALSE	TRUE	8.68902	4	11	4	High	High	High	High	Phospho [S225(100); S320(100); S371(100); S375(100); S416(98)]	35.93
High	ENSP00000417763.1	pep chromosome:GRCh38:X:153929225:153935037:-1 gene:ENSG00000102030.16 transcript:ENST00000464845.6 gene_biotype:protein_coding transcript_biotype:protein_coding gene_symbol:NAA10 description:N(alpha)-acetyltransferase 10, NatA catalytic subunit [Source:HGNC Symbol;Acc:HGNC:18704]	FALSE	TRUE	23.8298	6	13	6	High	High	High	High	Phospho [S182(100); S205(99.7); S228(91); S231(90.1)]	30.33
High	ENSP00000292616.5	pep chromosome:GRCh38:7:102464984:102473168:1 gene:ENSG00000161036.13 transcript:ENST00000292616.10 gene_biotype:protein_coding transcript_biotype:protein_coding gene_symbol:LRWD1 description:leucine rich repeats and WD repeat domain containing 1 [Source:HGNC Symbol;Acc:HGNC:21769]	FALSE	TRUE	8.65533	4	11	4	High	High	High	High	Phospho [S212(100); S243(92.3); S251(93.2)]	15.23
High	ENSP00000365049.1	pep chromosome:GRCh38:10:27197353:27240558:-1 gene:ENSG00000107897.19 transcript:ENST00000375888.5 gene_biotype:protein_coding transcript_biotype:protein_coding gene_symbol:ACBD5 description:acyl-CoA binding domain containing 5 [Source:HGNC Symbol;Acc:HGNC:23338]	FALSE	TRUE	5.61798	3	26	3	High	High	High	High	Phospho [S196(99.9); S215(100)]	64.97
High	ENSP00000373318.1	pep chromosome:GRCh38:3:10026429:10101930:1 gene:ENSG00000144554.10 transcript:ENST00000383807.5 gene_biotype:protein_coding transcript_biotype:protein_coding gene_symbol:FANCD2 description:FA complementation group D2 [Source:HGNC Symbol;Acc:HGNC:3585]	FALSE	TRUE	5.03101	4	10	4	High	High	High	High	Phospho [S882(99.4); S1417(99.7); S1435(100); S1450(99.9)]	36.15
High	ENSP00000264705.3	pep chromosome:GRCh38:2:27217369:27243943:1 gene:ENSG00000084774.14 transcript:ENST00000264705.9 gene_biotype:protein_coding transcript_biotype:protein_coding gene_symbol:CAD description:carbamoyl-phosphate synthetase 2, aspartate transcarbamylase, and dihydroorotase [Source:HGNC Symbol;Acc:HGNC:1424]	FALSE	TRUE	2.60674	4	21	4	High	High	High	High	Phospho [S1038(91.2); S1859(100)]	34.45
High	ENSP00000338191.4	pep chromosome:GRCh38:16:69187129:69309052:1 gene:ENSG00000168807.16 transcript:ENST00000336278.8 gene_biotype:protein_coding transcript_biotype:protein_coding gene_symbol:SNTB2 description:syntrophin beta 2 [Source:HGNC Symbol;Acc:HGNC:11169]	FALSE	TRUE	10.3704	4	15	4	High	High	High	High	Phospho [S95(100); S110(100); S222(99.9)]	36.06
High	ENSP00000264670.6	pep chromosome:GRCh38:5:6599239:6633044:-1 gene:ENSG00000037474.15 transcript:ENST00000264670.11 gene_biotype:protein_coding transcript_biotype:protein_coding gene_symbol:NSUN2 description:NOP2/Sun RNA methyltransferase 2 [Source:HGNC Symbol;Acc:HGNC:25994]	FALSE	TRUE	6.5189	2	12	2	High	High	High	High	Phospho [S456(98.4); S743(100)]	56.39
High	ENSP00000299767.4	pep chromosome:GRCh38:12:103930410:103947926:1 gene:ENSG00000166598.15 transcript:ENST00000299767.10 gene_biotype:protein_coding transcript_biotype:protein_coding gene_symbol:HSP90B1 description:heat shock protein 90 beta family member 1 [Source:HGNC Symbol;Acc:HGNC:12028]	FALSE	TRUE	9.58904	6	7	6	High	High	High	High	Phospho [S306(100)]	28.06
High	ENSP00000257430.4	pep chromosome:GRCh38:5:112737885:112846239:1 gene:ENSG00000134982.17 transcript:ENST00000257430.9 gene_biotype:protein_coding transcript_biotype:protein_coding gene_symbol:APC description:APC regulator of WNT signaling pathway [Source:HGNC Symbol;Acc:HGNC:583]	FALSE	TRUE	2.46219	7	14	7	High	High	High	High	Phospho [T1438(99.2); S2242(97.4); S2270(99.4); S2350(81.3); S2449(94.2); S2830(100)]	25.67
High	ENSP00000316779.5	pep chromosome:GRCh38:2:127048032:127107154:-1 gene:ENSG00000136717.15 transcript:ENST00000316724.10 gene_biotype:protein_coding transcript_biotype:protein_coding gene_symbol:BIN1 description:bridging integrator 1 [Source:HGNC Symbol;Acc:HGNC:1052]	FALSE	TRUE	7.4199	3	14	3	High	High	High	High	Phospho [S331(99.9)]	34.41
High	ENSP00000494562.1	pep chromosome:GRCh38:CHR_HG2114_PATCH:47721035:47771882:-1 gene:ENSG00000285182.2 transcript:ENST00000646180.2 gene_biotype:protein_coding transcript_biotype:protein_coding gene_symbol:FNBP4 description:formin binding protein 4 [Source:HGNC Symbol;Acc:HGNC:19752]	FALSE	TRUE	7.37463	5	12	5	High	High	High	High	Phospho [S432(99.6); S435(100); S464(98.9); S499(100); S964(88.1); S965(88.1)]	24.68
High	ENSP00000481886.1	pep chromosome:GRCh38:4:128269237:128288822:-1 gene:ENSG00000164040.18 transcript:ENST00000613358.4 gene_biotype:protein_coding transcript_biotype:protein_coding gene_symbol:PGRMC2 description:progesterone receptor membrane component 2 [Source:HGNC Symbol;Acc:HGNC:16089]	FALSE	TRUE	9.7166	3	18	3	High	High	High	High	Phospho [T235(95.1)]	32.32
High	ENSP00000450085.1	pep chromosome:GRCh38:17:7013733:7017520:1 gene:ENSG00000161939.19 transcript:ENST00000547302.3 gene_biotype:protein_coding transcript_biotype:protein_coding gene_symbol:RNASEK-C17orf49 description:RNASEK-C17orf49 readthrough [Source:HGNC Symbol;Acc:HGNC:44419]	FALSE	TRUE	20.1717	6	10	6	High	High	High	High	Phospho [S137(100); S151(85)]	26.8
High	ENSP00000421633.1	pep chromosome:GRCh38:4:82818672:82881937:-1 gene:ENSG00000138674.17 transcript:ENST00000505472.5 gene_biotype:protein_coding transcript_biotype:protein_coding gene_symbol:SEC31A description:SEC31 homolog A, COPII coat complex component [Source:HGNC Symbol;Acc:HGNC:17052]	FALSE	TRUE	4.8761	4	8	4	High	High	High	High	Phospho [S527(100); S799(100); T1192(96.1)]	25.03
High	ENSP00000362413.4	pep chromosome:GRCh38:X:78104248:78129295:1 gene:ENSG00000102144.15 transcript:ENST00000373316.5 gene_biotype:protein_coding transcript_biotype:protein_coding gene_symbol:PGK1 description:phosphoglycerate kinase 1 [Source:HGNC Symbol;Acc:HGNC:8896]	FALSE	TRUE	15.8273	6	9	6	High	High	High	High	Phospho [S203(100)]	26.03
High	ENSP00000005260.8	pep chromosome:GRCh38:7:98291650:98401090:-1 gene:ENSG00000006453.14 transcript:ENST00000005260.9 gene_biotype:protein_coding transcript_biotype:protein_coding gene_symbol:BAIAP2L1 description:BAI1 associated protein 2 like 1 [Source:HGNC Symbol;Acc:HGNC:21649]	FALSE	TRUE	7.82779	2	8	2	High	High	High	High	Phospho [S261(100); S414(90.8)]	25.44
High	ENSP00000364198.1	pep chromosome:GRCh38:X:54808371:54816007:1 gene:ENSG00000102316.17 transcript:ENST00000375058.5 gene_biotype:protein_coding transcript_biotype:protein_coding gene_symbol:MAGED2 description:MAGE family member D2 [Source:HGNC Symbol;Acc:HGNC:16353]	FALSE	TRUE	14.6865	5	12	5	High	High	High	High	Phospho [T72(91.5); S191(99.2); S247(99.1); S264(92.1)]	43.97
High	ENSP00000496720.1	pep chromosome:GRCh38:16:24540574:24572231:1 gene:ENSG00000122257.20 transcript:ENST00000646282.1 gene_biotype:protein_coding transcript_biotype:protein_coding gene_symbol:RBBP6 description:RB binding protein 6, ubiquitin ligase [Source:HGNC Symbol;Acc:HGNC:9889]	FALSE	TRUE	6.25355	8	11	8	High	High	High	High	Phospho [S810(100); S899(100); T1022(100); S1217(100); T1232(100); S1315(99.9)]	16.3
High	ENSP00000356814.3	pep chromosome:GRCh38:1:167936818:168075834:1 gene:ENSG00000143164.15 transcript:ENST00000367840.3 gene_biotype:protein_coding transcript_biotype:protein_coding gene_symbol:DCAF6 description:DDB1 and CUL4 associated factor 6 [Source:HGNC Symbol;Acc:HGNC:30002]	FALSE	TRUE	4.52156	4	7	4	High	High	High	High	Phospho [S734(100); S941(100)]	23.68
High	ENSP00000328720.4	pep chromosome:GRCh38:7:4682295:4771442:1 gene:ENSG00000164916.11 transcript:ENST00000328914.5 gene_biotype:protein_coding transcript_biotype:protein_coding gene_symbol:FOXK1 description:forkhead box K1 [Source:HGNC Symbol;Acc:HGNC:23480]	FALSE	TRUE	9.41337	5	13	4	High	High	High	High	Phospho [S101(100); S213(100); S416(100); S420(99.9); S428(99.1); T436(100); S445(100)]	29.7
High	ENSP00000499217.1	pep chromosome:GRCh38:8:143723933:143738234:-1 gene:ENSG00000180921.7 transcript:ENST00000650760.1 gene_biotype:protein_coding transcript_biotype:protein_coding gene_symbol:FAM83H description:family with sequence similarity 83 member H [Source:HGNC Symbol;Acc:HGNC:24797]	FALSE	TRUE	7.53623	9	13	9	High	High	High	High	Phospho [S714(91.4); S717(90.6); S724(100); S1093(100); S1115(100); S1204(100); S2173(78.8); S2173(98.5); S2173(98.5)]	28.9
High	ENSP00000304592.2	pep chromosome:GRCh38:17:82078338:82098236:-1 gene:ENSG00000169710.9 transcript:ENST00000306749.4 gene_biotype:protein_coding transcript_biotype:protein_coding gene_symbol:FASN description:fatty acid synthase [Source:HGNC Symbol;Acc:HGNC:3594]	FALSE	TRUE	3.26563	5	14	5	High	High	High	High	Phospho [S207(100); T976(99.9); S1411(100); T2204(100)]	26.51
High	ENSP00000258198.2	pep chromosome:GRCh38:16:66720893:66751609:-1 gene:ENSG00000135720.13 transcript:ENST00000258198.7 gene_biotype:protein_coding transcript_biotype:protein_coding gene_symbol:DYNC1LI2 description:dynein cytoplasmic 1 light intermediate chain 2 [Source:HGNC Symbol;Acc:HGNC:2966]	FALSE	TRUE	6.91057	2	11	2	High	High	High	High	Phospho [S194(100); S407(90.2)]	30.24
High	ENSP00000338643.2	pep chromosome:GRCh38:20:1442162:1466828:-1 gene:ENSG00000088833.17 transcript:ENST00000353088.6 gene_biotype:protein_coding transcript_biotype:protein_coding gene_symbol:NSFL1C description:NSFL1 cofactor [Source:HGNC Symbol;Acc:HGNC:15912]	FALSE	TRUE	12.3894	5	9	5	High	High	High	High	Phospho [S114(100); S140(99.9)]	19.75
High	ENSP00000301067.7	pep chromosome:GRCh38:12:49018975:49055324:-1 gene:ENSG00000167548.15 transcript:ENST00000301067.11 gene_biotype:protein_coding transcript_biotype:protein_coding gene_symbol:KMT2D description:lysine methyltransferase 2D [Source:HGNC Symbol;Acc:HGNC:7133]	FALSE	TRUE	1.48095	6	7	6	High	High	High	High	Phospho [S1180(100); T1843(100); S4359(100); S4738(100); S4822(100)]	19.28
High	ENSP00000344322.1	pep chromosome:GRCh38:20:4852358:5001510:-1 gene:ENSG00000089057.15 transcript:ENST00000338244.6 gene_biotype:protein_coding transcript_biotype:protein_coding gene_symbol:SLC23A2 description:solute carrier family 23 member 2 [Source:HGNC Symbol;Acc:HGNC:10973]	FALSE	TRUE	5.07692	2	23	2	High	High	High	High	Phospho [S78(99.6); S81(100); S642(99.1); S646(99.9)]	65.33
High	ENSP00000297071.4	pep chromosome:GRCh38:7:23504780:23531981:-1 gene:ENSG00000164548.11 transcript:ENST00000297071.9 gene_biotype:protein_coding transcript_biotype:protein_coding gene_symbol:TRA2A description:transformer 2 alpha homolog [Source:HGNC Symbol;Acc:HGNC:16645]	FALSE	TRUE	16.3121	9	28	5	High	High	High	High	Phospho [S34(99.8); S36(98.8); T69(100); S71(100); S96(100); S100(100); S260(100); S262(100)]	26.97
High	ENSP00000387059.3	pep chromosome:GRCh38:17:75135248:75154512:-1 gene:ENSG00000189159.16 transcript:ENST00000409753.8 gene_biotype:protein_coding transcript_biotype:protein_coding gene_symbol:JPT1 description:Jupiter microtubule associated homolog 1 [Source:HGNC Symbol;Acc:HGNC:14569]	FALSE	TRUE	58.4416	5	16	5	High	High	High	High	Phospho [T54(100); S70(98.4); S131(100)]	35.42
High	ENSP00000343054.3	pep chromosome:GRCh38:3:50088919:50119021:1 gene:ENSG00000003756.17 transcript:ENST00000347869.8 gene_biotype:protein_coding transcript_biotype:protein_coding gene_symbol:RBM5 description:RNA binding motif protein 5 [Source:HGNC Symbol;Acc:HGNC:9902]	FALSE	TRUE	6.13497	4	8	4	High	High	High	High	Phospho [S59(99.4); S78(100); S624(100)]	27.65
High	ENSP00000359991.4	pep chromosome:GRCh38:10:97426191:97433444:1 gene:ENSG00000171314.9 transcript:ENST00000334828.6 gene_biotype:protein_coding transcript_biotype:protein_coding gene_symbol:PGAM1 description:phosphoglycerate mutase 1 [Source:HGNC Symbol;Acc:HGNC:8888]	FALSE	TRUE	29.9213	6	10	6	High	High	High	High	Phospho [S31(98.4); S118(99.5)]	19.29
High	ENSP00000234420.4	pep chromosome:GRCh38:2:47783082:47810101:1 gene:ENSG00000116062.15 transcript:ENST00000234420.9 gene_biotype:protein_coding transcript_biotype:protein_coding gene_symbol:MSH6 description:mutS homolog 6 [Source:HGNC Symbol;Acc:HGNC:7329]	FALSE	TRUE	5.88235	5	11	5	High	High	High	High	Phospho [S65(100); S137(99.5); S227(100); S252(96.9); S287(84.4)]	32.78
High	ENSP00000238647.3	pep chromosome:GRCh38:14:77024543:77028708:-1 gene:ENSG00000119669.5 transcript:ENST00000238647.5 gene_biotype:protein_coding transcript_biotype:protein_coding gene_symbol:IRF2BPL description:interferon regulatory factor 2 binding protein like [Source:HGNC Symbol;Acc:HGNC:14282]	FALSE	TRUE	5.27638	3	12	3	High	High	High	High	Phospho [S334(100); S336(92); S547(100); S662(100)]	21.59
High	ENSP00000366843.3	pep chromosome:GRCh38:12:111452268:111599676:-1 gene:ENSG00000204842.17 transcript:ENST00000377617.8 gene_biotype:protein_coding transcript_biotype:protein_coding gene_symbol:ATXN2 description:ataxin 2 [Source:HGNC Symbol;Acc:HGNC:10555]	FALSE	TRUE	5.78827	6	13	2	High	High	High	High	Phospho [S758(100); S772(90.5); S784(100)]	25.45
High	ENSP00000356520.3	pep chromosome:GRCh38:1:182839347:182887982:1 gene:ENSG00000135829.17 transcript:ENST00000367549.4 gene_biotype:protein_coding transcript_biotype:protein_coding gene_symbol:DHX9 description:DExH-box helicase 9 [Source:HGNC Symbol;Acc:HGNC:2750]	FALSE	TRUE	5.59055	2	9	2	High	High	High	High	Phospho [S87(100)]	31.69
High	ENSP00000339740.5	pep chromosome:GRCh38:4:113454105:113761068:-1 gene:ENSG00000145349.17 transcript:ENST00000342666.9 gene_biotype:protein_coding transcript_biotype:protein_coding gene_symbol:CAMK2D description:calcium/calmodulin dependent protein kinase II delta [Source:HGNC Symbol;Acc:HGNC:1462]	FALSE	TRUE	4.40882	2	19	2	High	High	High	High	Phospho [T336(100); T337(100)]	36.07
High	ENSP00000314348.3	pep chromosome:GRCh38:11:108665069:108940927:1 gene:ENSG00000178105.11 transcript:ENST00000322536.8 gene_biotype:protein_coding transcript_biotype:protein_coding gene_symbol:DDX10 description:DEAD-box helicase 10 [Source:HGNC Symbol;Acc:HGNC:2735]	FALSE	TRUE	5.82857	3	9	3	High	High	High	High	Phospho [S7(98.8); T577(100); S809(100)]	24.85
High	ENSP00000318861.6	pep chromosome:GRCh38:11:66052364:66069308:1 gene:ENSG00000087365.16 transcript:ENST00000322535.11 gene_biotype:protein_coding transcript_biotype:protein_coding gene_symbol:SF3B2 description:splicing factor 3b subunit 2 [Source:HGNC Symbol;Acc:HGNC:10769]	FALSE	TRUE	5.02793	3	13	3	High	High	High	High	Phospho [S435(100); S436(100)]	25.55
High	ENSP00000378752.1	pep chromosome:GRCh38:20:62877743:62926503:-1 gene:ENSG00000101191.16 transcript:ENST00000395343.5 gene_biotype:protein_coding transcript_biotype:protein_coding gene_symbol:DIDO1 description:death inducer-obliterator 1 [Source:HGNC Symbol;Acc:HGNC:2680]	FALSE	TRUE	3.30357	4	17	4	High	High	High	High	Phospho [T151(99.5); S154(100); S809(99.1); T1719(98.7)]	37.2
High	ENSP00000269701.1	pep chromosome:GRCh38:19:15353385:15379787:-1 gene:ENSG00000105127.9 transcript:ENST00000269701.7 gene_biotype:protein_coding transcript_biotype:protein_coding gene_symbol:AKAP8 description:A-kinase anchoring protein 8 [Source:HGNC Symbol;Acc:HGNC:378]	FALSE	TRUE	5.0578	3	7	3	High	High	High	High	Phospho [S328(100); S339(100)]	26.34
High	ENSP00000377747.4	pep chromosome:GRCh38:15:92900324:93027996:1 gene:ENSG00000173575.21 transcript:ENST00000394196.9 gene_biotype:protein_coding transcript_biotype:protein_coding gene_symbol:CHD2 description:chromodomain helicase DNA binding protein 2 [Source:HGNC Symbol;Acc:HGNC:1917]	FALSE	TRUE	3.06346	8	10	8	High	High	High	High	Phospho [S156(100); S168(100); S207(100); S208(100); S1085(100); S1087(99.9)]	21.83
High	ENSP00000365439.3	pep chromosome:GRCh38:9:83968083:83980215:-1 gene:ENSG00000165119.21 transcript:ENST00000376263.8 gene_biotype:protein_coding transcript_biotype:protein_coding gene_symbol:HNRNPK description:heterogeneous nuclear ribonucleoprotein K [Source:HGNC Symbol;Acc:HGNC:5044]	FALSE	TRUE	20.4741	6	23	6	High	High	High	High	Phospho [T118(80.9); S216(100); S284(100); S379(88.4)]	29.3
High	ENSP00000375857.4	pep chromosome:GRCh38:2:237692339:237764961:1 gene:ENSG00000124831.19 transcript:ENST00000392000.4 gene_biotype:protein_coding transcript_biotype:protein_coding gene_symbol:LRRFIP1 description:LRR binding FLII interacting protein 1 [Source:HGNC Symbol;Acc:HGNC:6702]	FALSE	TRUE	12.8713	5	10	5	High	High	High	High	Phospho [S521(97.8); S581(100); S714(93.5); S733(100); S768(99.4)]	25.35
High	ENSP00000478927.1	pep chromosome:GRCh38:11:102110461:102233423:1 gene:ENSG00000137693.14 transcript:ENST00000615667.4 gene_biotype:protein_coding transcript_biotype:protein_coding gene_symbol:YAP1 description:Yes associated protein 1 [Source:HGNC Symbol;Acc:HGNC:16262]	FALSE	TRUE	16.1417	4	11	4	High	High	High	High	Phospho [S109(93); T119(100); S371(98.4)]	29.4
High	ENSP00000484435.1	pep chromosome:GRCh38:12:6867420:6870946:1 gene:ENSG00000111669.15 transcript:ENST00000613953.4 gene_biotype:protein_coding transcript_biotype:protein_coding gene_symbol:TPI1 description:triosephosphate isomerase 1 [Source:HGNC Symbol;Acc:HGNC:12009]	FALSE	TRUE	26.9231	6	8	6	High	High	High	High	Phospho [S58(100)]	19.61
High	ENSP00000369887.2	pep chromosome:GRCh38:15:58879050:58933679:-1 gene:ENSG00000137776.17 transcript:ENST00000380516.7 gene_biotype:protein_coding transcript_biotype:protein_coding gene_symbol:SLTM description:SAFB like transcription modulator [Source:HGNC Symbol;Acc:HGNC:20709]	FALSE	TRUE	5.02901	5	11	5	High	High	High	High	Phospho [S289(100); S371(91); S374(90.9); S553(100); S590(100)]	30.11
High	ENSP00000492514.2	pep chromosome:GRCh38:CHR_HG926_PATCH:21946243:21983930:-1 gene:ENSG00000284282.3 transcript:ENST00000639550.2 gene_biotype:protein_coding transcript_biotype:protein_coding gene_symbol:POLR3E description:RNA polymerase III subunit E [Source:HGNC Symbol;Acc:HGNC:30347]	FALSE	TRUE	7.34463	2	8	2	High	High	High	High	Phospho [S162(99.6); S503(100)]	28.84
High	ENSP00000489752.1	pep chromosome:GRCh38:2:73073382:73112783:-1 gene:ENSG00000135631.16 transcript:ENST00000486777.6 gene_biotype:protein_coding transcript_biotype:protein_coding gene_symbol:RAB11FIP5 description:RAB11 family interacting protein 5 [Source:HGNC Symbol;Acc:HGNC:24845]	FALSE	TRUE	3.92749	5	13	2	High	High	High	High	Phospho [S307(99.9); S482(94.6); S866(100); S871(99.9); S898(91.7)]	21.96
High	ENSP00000263980.3	pep chromosome:GRCh38:1:27098809:27155125:-1 gene:ENSG00000090020.11 transcript:ENST00000263980.8 gene_biotype:protein_coding transcript_biotype:protein_coding gene_symbol:SLC9A1 description:solute carrier family 9 member A1 [Source:HGNC Symbol;Acc:HGNC:11071]	FALSE	TRUE	5.39877	4	12	4	High	High	High	High	Phospho [S693(93.4); S703(100); S785(99.3)]	26.78
High	ENSP00000483133.1	pep chromosome:GRCh38:1:110339323:110346681:1 gene:ENSG00000162775.16 transcript:ENST00000618772.4 gene_biotype:protein_coding transcript_biotype:protein_coding gene_symbol:RBM15 description:RNA binding motif protein 15 [Source:HGNC Symbol;Acc:HGNC:14959]	FALSE	TRUE	8.80246	7	14	7	High	High	High	High	Phospho [S109(100); S128(99.3); T568(100); S656(92.2); S670(100); S674(100); S700(100); S741(100)]	15.3
High	ENSP00000494067.1	pep chromosome:GRCh38:3:69021848:69052333:-1 gene:ENSG00000144747.17 transcript:ENST00000646708.1 gene_biotype:protein_coding transcript_biotype:protein_coding gene_symbol:TMF1 description:TATA element modulatory factor 1 [Source:HGNC Symbol;Acc:HGNC:11870]	FALSE	TRUE	3.83212	2	7	2	High	High	High	High	Phospho [S344(100); T401(89.6)]	24.56
High	ENSP00000313420.3	pep chromosome:GRCh38:8:47773108:47960183:-1 gene:ENSG00000253729.7 transcript:ENST00000314191.6 gene_biotype:protein_coding transcript_biotype:protein_coding gene_symbol:PRKDC description:protein kinase, DNA-activated, catalytic subunit [Source:HGNC Symbol;Acc:HGNC:9413]	FALSE	TRUE	2.15601	4	7	4	High	High	High	High	Phospho [S3205(100); S3436(100); S4026(100)]	22.94
High	ENSP00000263026.5	pep chromosome:GRCh38:16:22206278:22288738:1 gene:ENSG00000103319.12 transcript:ENST00000263026.10 gene_biotype:protein_coding transcript_biotype:protein_coding gene_symbol:EEF2K description:eukaryotic elongation factor 2 kinase [Source:HGNC Symbol;Acc:HGNC:24615]	FALSE	TRUE	6.75862	4	12	4	High	High	High	High	Phospho [S18(100); S445(99.6); S470(100); S474(100)]	21.94
High	ENSP00000459719.1	pep chromosome:GRCh38:19:42268537:42295796:1 gene:ENSG00000079432.7 transcript:ENST00000572681.6 gene_biotype:protein_coding transcript_biotype:protein_coding gene_symbol:CIC description:capicua transcriptional repressor [Source:HGNC Symbol;Acc:HGNC:14214]	FALSE	TRUE	4.3755	7	10	7	High	High	High	High	Phospho [S780(100); S1082(92.4); T1344(99.7); S1345(100); T1381(100); S1388(100); S1389(100); S1405(100); S2153(99.3); S2288(85.6)]	29.8
High	ENSP00000393840.1	pep chromosome:GRCh38:19:45178745:45181801:1 gene:ENSG00000189114.7 transcript:ENST00000433642.2 gene_biotype:protein_coding transcript_biotype:protein_coding gene_symbol:BLOC1S3 description:biogenesis of lysosomal organelles complex 1 subunit 3 [Source:HGNC Symbol;Acc:HGNC:20914]	FALSE	TRUE	29.2079	3	7	3	High	High	High	High	Phospho [S27(99.3); S33(87.8); S34(97.5); S65(99.3)]	26.71
High	ENSP00000432786.1	pep chromosome:GRCh38:11:67119263:67258082:1 gene:ENSG00000173120.15 transcript:ENST00000529006.7 gene_biotype:protein_coding transcript_biotype:protein_coding gene_symbol:KDM2A description:lysine demethylase 2A [Source:HGNC Symbol;Acc:HGNC:13606]	FALSE	TRUE	6.11015	6	8	6	High	High	High	High	Phospho [S28(100); S692(100); S869(100); Y1094(98.9)]	27.34
High	ENSP00000351410.1	pep chromosome:GRCh38:17:68512032:68532762:1 gene:ENSG00000108946.14 transcript:ENST00000358598.6 gene_biotype:protein_coding transcript_biotype:protein_coding gene_symbol:PRKAR1A description:protein kinase cAMP-dependent type I regulatory subunit alpha [Source:HGNC Symbol;Acc:HGNC:9388]	FALSE	TRUE	4.72441	2	6	2	High	High	High	High	Phospho [S83(100)]	16.22
High	ENSP00000271688.6	pep chromosome:GRCh38:1:150965173:150975003:-1 gene:ENSG00000143418.19 transcript:ENST00000271688.10 gene_biotype:protein_coding transcript_biotype:protein_coding gene_symbol:CERS2 description:ceramide synthase 2 [Source:HGNC Symbol;Acc:HGNC:14076]	FALSE	TRUE	7.10526	2	6	2	High	High	High	High	Phospho [S348(99.7); S349(100)]	22.17
High	ENSP00000275820.3	pep chromosome:GRCh38:7:156949712:156973176:1 gene:ENSG00000146909.8 transcript:ENST00000275820.4 gene_biotype:protein_coding transcript_biotype:protein_coding gene_symbol:NOM1 description:nucleolar protein with MIF4G domain 1 [Source:HGNC Symbol;Acc:HGNC:13244]	FALSE	TRUE	6.04651	5	8	5	High	High	High	High	Phospho [S139(100); S280(100); T287(100); S320(100); S321(100)]	36.78
High	ENSP00000352222.4	pep chromosome:GRCh38:X:16587999:16712669:-1 gene:ENSG00000047230.15 transcript:ENST00000359276.9 gene_biotype:protein_coding transcript_biotype:protein_coding gene_symbol:CTPS2 description:CTP synthase 2 [Source:HGNC Symbol;Acc:HGNC:2520]	FALSE	TRUE	3.24232	2	15	2	High	High	High	High	Phospho [S568(93.5); S571(93.5)]	18.69
High	ENSP00000370125.5	pep chromosome:GRCh38:21:39342315:39349088:-1 gene:ENSG00000205581.11 transcript:ENST00000380749.10 gene_biotype:protein_coding transcript_biotype:protein_coding gene_symbol:HMGN1 description:high mobility group nucleosome binding domain 1 [Source:HGNC Symbol;Acc:HGNC:4984]	FALSE	TRUE	28	3	12	3	High	High	High	High	Phospho [S7(93.2); S89(100); S99(100)]	33.65
High	ENSP00000416534.2	pep chromosome:GRCh38:5:134758779:134831121:1 gene:ENSG00000145833.16 transcript:ENST00000452510.7 gene_biotype:protein_coding transcript_biotype:protein_coding gene_symbol:DDX46 description:DEAD-box helicase 46 [Source:HGNC Symbol;Acc:HGNC:18681]	FALSE	TRUE	6.68605	7	15	7	High	High	High	High	Phospho [S26(99.4); S102(100); S104(99.8)]	23.78
High	ChAdOx_nCoV19_protein_DBP(E2A)	ChAdOx_nCoV19_protein_DBP(E2A)	FALSE	TRUE	12.6953	5	29	5	High	High	High	High	Phospho [T16(100); S36(95.5); S68(90.8); S99(100)]	44.7
High	ENSP00000376410.4	pep chromosome:GRCh38:14:104689618:104722535:1 gene:ENSG00000203485.13 transcript:ENST00000392634.9 gene_biotype:protein_coding transcript_biotype:protein_coding gene_symbol:INF2 description:inverted formin, FH2 and WH2 domain containing [Source:HGNC Symbol;Acc:HGNC:23791]	FALSE	TRUE	7.60608	4	10	4	High	High	High	High	Phospho [S589(99.9); S1188(99.5); S1204(95.1)]	29.15
High	ENSP00000479964.1	pep chromosome:GRCh38:2:27663471:27694976:1 gene:ENSG00000163798.13 transcript:ENST00000613058.4 gene_biotype:protein_coding transcript_biotype:protein_coding gene_symbol:SLC4A1AP description:solute carrier family 4 member 1 adaptor protein [Source:HGNC Symbol;Acc:HGNC:13813]	FALSE	TRUE	9.29648	4	9	4	High	High	High	High	Phospho [S82(100); T140(86.3); S312(100); S712(97.4)]	24.95
High	ENSP00000232888.6	pep chromosome:GRCh38:3:51933429:51941904:-1 gene:ENSG00000114767.7 transcript:ENST00000232888.7 gene_biotype:protein_coding transcript_biotype:protein_coding gene_symbol:RRP9 description:ribosomal RNA processing 9, U3 small nucleolar RNA binding protein [Source:HGNC Symbol;Acc:HGNC:16829]	FALSE	TRUE	3.57895	1	24	1	High	High	High	High	Phospho [S53(94.7)]	68.9
High	ENSP00000359000.3	pep chromosome:GRCh38:10:102245532:102382899:1 gene:ENSG00000107862.4 transcript:ENST00000369983.3 gene_biotype:protein_coding transcript_biotype:protein_coding gene_symbol:GBF1 description:golgi brefeldin A resistant guanine nucleotide exchange factor 1 [Source:HGNC Symbol;Acc:HGNC:4181]	FALSE	TRUE	3.5503	4	12	4	High	High	High	High	Phospho [S233(100); S1298(100); Y1316(86.8); S1780(99.5); S1784(99.6)]	21.87
High	ENSP00000451932.1	pep chromosome:GRCh38:17:51153636:51171742:1 gene:ENSG00000011052.21 transcript:ENST00000555572.1 gene_biotype:protein_coding transcript_biotype:protein_coding gene_symbol:NME1-NME2 description:NME1-NME2 readthrough [Source:HGNC Symbol;Acc:HGNC:33531]	FALSE	TRUE	31.1644	5	7	5	High	High	High	High	Phospho [T347(100); T347(99.8); T347(100)]	17.81
High	ENSP00000394056.2	pep chromosome:GRCh38:CHR_HSCHR6_MHC_APD_CTG1:30059587:30062832:1 gene:ENSG00000233314.6 transcript:ENST00000437937.6 gene_biotype:protein_coding transcript_biotype:protein_coding gene_symbol:PPP1R11 description:protein phosphatase 1 regulatory inhibitor subunit 11 [Source:HGNC Symbol;Acc:HGNC:9285]	FALSE	TRUE	19.0476	1	14	1	High	High	High	High	Phospho [S73(99.6); S74(95.6)]	24.61
High	ENSP00000225603.4	pep chromosome:GRCh38:17:48070059:48101478:-1 gene:ENSG00000108468.15 transcript:ENST00000225603.9 gene_biotype:protein_coding transcript_biotype:protein_coding gene_symbol:CBX1 description:chromobox 1 [Source:HGNC Symbol;Acc:HGNC:1551]	FALSE	TRUE	17.2973	5	11	5	High	High	High	High	Phospho [S89(100)]	19.54
High	ENSP00000325941.5	pep chromosome:GRCh38:11:208530:215113:1 gene:ENSG00000177963.14 transcript:ENST00000325207.9 gene_biotype:protein_coding transcript_biotype:protein_coding gene_symbol:RIC8A description:RIC8 guanine nucleotide exchange factor A [Source:HGNC Symbol;Acc:HGNC:29550]	FALSE	TRUE	8.56611	3	8	3	High	High	High	High	Phospho [S442(99.2); T447(99.9)]	20.87
High	ENSP00000426948.1	pep chromosome:GRCh38:5:131425891:131796983:-1 gene:ENSG00000273217.1 transcript:ENST00000514667.1 gene_biotype:protein_coding transcript_biotype:protein_coding gene_symbol:AC008695.1 description:novel protein	FALSE	TRUE	2.84676	3	5	3	High	High	High	High	Phospho [S280(100); S1640(100)]	22.8
High	ENSP00000322579.3	pep chromosome:GRCh38:17:7235038:7239457:-1 gene:ENSG00000040633.13 transcript:ENST00000320316.8 gene_biotype:protein_coding transcript_biotype:protein_coding gene_symbol:PHF23 description:PHD finger protein 23 [Source:HGNC Symbol;Acc:HGNC:28428]	FALSE	TRUE	9.67742	2	6	2	High	High	High	High	Phospho [S74(99.9); S315(96.1)]	22.68
High	ENSP00000496634.1	pep chromosome:GRCh38:12:6570208:6606373:-1 gene:ENSG00000111642.15 transcript:ENST00000645095.1 gene_biotype:protein_coding transcript_biotype:protein_coding gene_symbol:CHD4 description:chromodomain helicase DNA binding protein 4 [Source:HGNC Symbol;Acc:HGNC:1919]	FALSE	TRUE	5.61856	5	18	5	High	High	High	High	Phospho [S105(99.7); S108(100); S428(100); S1563(100)]	31.51
High	ENSP00000486000.1	pep chromosome:GRCh38:CHR_HG2104_PATCH:112911847:112956353:-1 gene:ENSG00000281917.2 transcript:ENST00000630362.2 gene_biotype:protein_coding transcript_biotype:protein_coding gene_symbol:SLC16A1 description:solute carrier family 16 member 1 [Source:HGNC Symbol;Acc:HGNC:10922]	FALSE	TRUE	9.8	5	11	5	High	High	High	High	Phospho [S213(100); S461(100); S483(100); S498(100)]	21.62
High	P08729	Keratin, type II cytoskeletal 7 OS=Homo sapiens GN=KRT7 PE=1 SV=5	TRUE	TRUE	17.484	7	8	5	High	High	High	High	Phospho [S7(83.5); S14(100)]; Met-loss+Acetyl [N-Term]	18.35
High	ENSP00000308546.2	pep chromosome:GRCh38:7:100429831:100434118:1 gene:ENSG00000146834.14 transcript:ENST00000310512.4 gene_biotype:protein_coding transcript_biotype:protein_coding gene_symbol:MEPCE description:methylphosphate capping enzyme [Source:HGNC Symbol;Acc:HGNC:20247]	FALSE	TRUE	14.9492	5	8	5	High	High	High	High	Phospho [S60(100); S69(100); S254(100); S330(87.7); S369(88)]	17.44
High	ENSP00000484580.1	pep chromosome:GRCh38:3:195514428:195543325:-1 gene:ENSG00000184203.8 transcript:ENST00000618156.5 gene_biotype:protein_coding transcript_biotype:protein_coding gene_symbol:PPP1R2 description:protein phosphatase 1 regulatory inhibitor subunit 2 [Source:HGNC Symbol;Acc:HGNC:9288]	FALSE	TRUE	26.3415	2	11	2	High	High	High	High	Phospho [S87(99.8); S122(89.3)]	34.01
High	ENSP00000267163.4	pep chromosome:GRCh38:13:48303726:48481890:1 gene:ENSG00000139687.15 transcript:ENST00000267163.5 gene_biotype:protein_coding transcript_biotype:protein_coding gene_symbol:RB1 description:RB transcriptional corepressor 1 [Source:HGNC Symbol;Acc:HGNC:9884]	FALSE	TRUE	8.51293	5	8	5	High	High	High	High	Phospho [S37(100); T373(100); S807(100); T821(99.9)]	21.38
High	ENSP00000428378.1	pep chromosome:GRCh38:5:150617644:150652334:1 gene:ENSG00000171992.13 transcript:ENST00000522122.1 gene_biotype:protein_coding transcript_biotype:protein_coding gene_symbol:SYNPO description:synaptopodin [Source:HGNC Symbol;Acc:HGNC:30672]	FALSE	TRUE	9.58019	7	10	1	Medium	Medium	Medium	Medium	Phospho [S232(100); S235(100); S263(100); S536(100); S685(100); S754(99.5); S833(98.7)]	24.67
High	ENSP00000386788.3	pep chromosome:GRCh38:2:180980605:181063425:1 gene:ENSG00000170035.16 transcript:ENST00000410062.9 gene_biotype:protein_coding transcript_biotype:protein_coding gene_symbol:UBE2E3 description:ubiquitin conjugating enzyme E2 E3 [Source:HGNC Symbol;Acc:HGNC:12479]	FALSE	TRUE	15.942	2	10	2	High	High	High	High	Phospho [S8(100)]	31.11
High	ENSP00000383851.2	pep chromosome:GRCh38:1:32741830:32774970:1 gene:ENSG00000162522.11 transcript:ENST00000401073.7 gene_biotype:protein_coding transcript_biotype:protein_coding gene_symbol:KIAA1522 description:KIAA1522 [Source:HGNC Symbol;Acc:HGNC:29301]	FALSE	TRUE	5.75868	5	11	5	High	High	High	High	Phospho [S463(92.3); S604(100); S988(100)]	19.56
High	ENSP00000338258.3	pep chromosome:GRCh38:17:73283624:73312001:-1 gene:ENSG00000179604.10 transcript:ENST00000335793.4 gene_biotype:protein_coding transcript_biotype:protein_coding gene_symbol:CDC42EP4 description:CDC42 effector protein 4 [Source:HGNC Symbol;Acc:HGNC:17147]	FALSE	TRUE	21.9101	4	8	4	High	High	High	High	Phospho [S64(100); S142(99.1); S292(89.4); S322(100)]	25.26
High	ENSP00000303427.8	pep chromosome:GRCh38:4:39822863:39977911:-1 gene:ENSG00000121892.15 transcript:ENST00000303538.13 gene_biotype:protein_coding transcript_biotype:protein_coding gene_symbol:PDS5A description:PDS5 cohesin associated factor A [Source:HGNC Symbol;Acc:HGNC:29088]	FALSE	TRUE	3.36574	3	6	3	High	High	High	High	Phospho [S1195(100); T1208(100); S1305(100)]	21.77
High	ENSP00000479861.1	pep chromosome:GRCh38:2:241315861:241354024:1 gene:ENSG00000168385.18 transcript:ENST00000616972.4 gene_biotype:protein_coding transcript_biotype:protein_coding gene_symbol:SEPTIN2 description:septin 2 [Source:HGNC Symbol;Acc:HGNC:7729]	FALSE	TRUE	5.05051	2	9	2	High	High	High	High	Phospho [S253(100)]	24.83
High	ENSP00000382239.2	pep chromosome:GRCh38:8:93729356:93741017:-1 gene:ENSG00000183808.11 transcript:ENST00000399300.6 gene_biotype:protein_coding transcript_biotype:protein_coding gene_symbol:RBM12B description:RNA binding motif protein 12B [Source:HGNC Symbol;Acc:HGNC:32310]	FALSE	TRUE	9.69031	9	19	9	High	High	High	High	Phospho [S250(100); S254(100); S278(94.2); S575(100); S718(100); S839(100)]	15.54
High	ENSP00000252483.4	pep chromosome:GRCh38:19:44846297:44889223:1 gene:ENSG00000130202.10 transcript:ENST00000252483.10 gene_biotype:protein_coding transcript_biotype:protein_coding gene_symbol:NECTIN2 description:nectin cell adhesion molecule 2 [Source:HGNC Symbol;Acc:HGNC:9707]	FALSE	TRUE	12.6394	4	8	4	High	High	High	High	Phospho [T410(100); S433(99.8); S520(99.9)]	16.59
High	ENSP00000370156.1	pep chromosome:GRCh38:X:10445556:10576955:-1 gene:ENSG00000101871.14 transcript:ENST00000380779.5 gene_biotype:protein_coding transcript_biotype:protein_coding gene_symbol:MID1 description:midline 1 [Source:HGNC Symbol;Acc:HGNC:7095]	FALSE	TRUE	4.64768	3	10	3	High	High	High	High	Phospho [S96(100)]	22.27
High	ENSP00000326128.3	pep chromosome:GRCh38:10:809542:885762:-1 gene:ENSG00000107929.14 transcript:ENST00000316157.7 gene_biotype:protein_coding transcript_biotype:protein_coding gene_symbol:LARP4B description:La ribonucleoprotein domain family member 4B [Source:HGNC Symbol;Acc:HGNC:28987]	FALSE	TRUE	12.7371	7	19	7	High	High	High	High	Phospho [S484(100); S488(92.4); S498(99.9); S601(99.7); S718(98.3); T732(99.6); S736(100)]	23.58
High	ENSP00000386538.3	pep chromosome:GRCh38:16:30357102:30370494:-1 gene:ENSG00000169221.14 transcript:ENST00000409939.8 gene_biotype:protein_coding transcript_biotype:protein_coding gene_symbol:TBC1D10B description:TBC1 domain family member 10B [Source:HGNC Symbol;Acc:HGNC:24510]	FALSE	TRUE	6.93069	4	10	4	High	High	High	High	Phospho [S22(100); S132(100); T148(99.9); T152(82.9); S678(100)]	17.6
High	ENSP00000377298.3	pep chromosome:GRCh38:11:72002864:72080687:-1 gene:ENSG00000137497.17 transcript:ENST00000393695.7 gene_biotype:protein_coding transcript_biotype:protein_coding gene_symbol:NUMA1 description:nuclear mitotic apparatus protein 1 [Source:HGNC Symbol;Acc:HGNC:8059]	FALSE	TRUE	3.59338	4	8	4	High	High	High	High	Phospho [S169(97.6); S1757(100); S1769(98.5); T2000(100)]	27.89
High	ENSP00000491014.1	pep chromosome:GRCh38:14:39234115:39350264:1 gene:ENSG00000150527.17 transcript:ENST00000640607.1 gene_biotype:protein_coding transcript_biotype:protein_coding gene_symbol:MIA2 description:MIA SH3 domain ER export factor 2 [Source:HGNC Symbol;Acc:HGNC:18432]	FALSE	TRUE	4.95751	5	24	5	High	High	High	High	Phospho [S1130(99.6); S1144(100); S1204(100); S1243(100)]	49.5
High	ENSP00000395487.2	pep chromosome:GRCh38:4:145133650:145180589:-1 gene:ENSG00000164164.17 transcript:ENST00000447906.8 gene_biotype:protein_coding transcript_biotype:protein_coding gene_symbol:OTUD4 description:OTU deubiquitinase 4 [Source:HGNC Symbol;Acc:HGNC:24949]	FALSE	TRUE	4.66786	4	10	4	High	High	High	High	Phospho [S443(100); S546(99.5); S1006(100); S1023(99.2)]	27.27
High	ENSP00000316029.9	pep chromosome:GRCh38:9:35696948:35732195:-1 gene:ENSG00000137076.21 transcript:ENST00000314888.10 gene_biotype:protein_coding transcript_biotype:protein_coding gene_symbol:TLN1 description:talin 1 [Source:HGNC Symbol;Acc:HGNC:11845]	FALSE	TRUE	1.53483	5	7	5	High	High	High	High	Phospho [S425(100); T1263(100); S1641(99.9)]	16.08
High	ENSP00000379051.2	pep chromosome:GRCh38:7:44876299:44885530:-1 gene:ENSG00000146676.10 transcript:ENST00000395699.5 gene_biotype:protein_coding transcript_biotype:protein_coding gene_symbol:PURB description:purine rich element binding protein B [Source:HGNC Symbol;Acc:HGNC:9702]	FALSE	TRUE	16.3462	3	11	3	High	High	High	High	Phospho [S101(97.2); S304(100)]	23.37
High	ENSP00000325313.3	pep chromosome:GRCh38:19:17719480:17734513:1 gene:ENSG00000130479.11 transcript:ENST00000324096.9 gene_biotype:protein_coding transcript_biotype:protein_coding gene_symbol:MAP1S description:microtubule associated protein 1S [Source:HGNC Symbol;Acc:HGNC:15715]	FALSE	TRUE	8.02644	4	8	4	High	High	High	High	Phospho [S472(100); S731(99.6); S759(100)]	22.19
High	ENSP00000456935.1	pep chromosome:GRCh38:16:30352847:30354934:-1 gene:ENSG00000169217.9 transcript:ENST00000569466.1 gene_biotype:protein_coding transcript_biotype:protein_coding gene_symbol:CD2BP2 description:CD2 cytoplasmic tail binding protein 2 [Source:HGNC Symbol;Acc:HGNC:1656]	FALSE	TRUE	9.97067	5	21	5	High	High	High	High	Phospho [S49(99.9); S194(94.4)]	48.31
High	ENSP00000181839.4	pep chromosome:GRCh38:7:39950256:40099580:1 gene:ENSG00000065883.16 transcript:ENST00000181839.10 gene_biotype:protein_coding transcript_biotype:protein_coding gene_symbol:CDK13 description:cyclin dependent kinase 13 [Source:HGNC Symbol;Acc:HGNC:1733]	FALSE	TRUE	6.94444	8	11	8	High	High	High	High	Phospho [S317(92.8); S325(100); S342(99.9); S383(100); S525(99.8); S662(90.9); T1246(100)]	19.25
High	ENSP00000264279.5	pep chromosome:GRCh38:2:202265763:202303661:1 gene:ENSG00000055044.11 transcript:ENST00000264279.10 gene_biotype:protein_coding transcript_biotype:protein_coding gene_symbol:NOP58 description:NOP58 ribonucleoprotein [Source:HGNC Symbol;Acc:HGNC:29926]	FALSE	TRUE	4.53686	3	10	3	High	High	High	High	Phospho [S502(100)]	30.34
High	ENSP00000418385.1	pep chromosome:GRCh38:7:139045916:139109354:-1 gene:ENSG00000105939.13 transcript:ENST00000464606.5 gene_biotype:protein_coding transcript_biotype:protein_coding gene_symbol:ZC3HAV1 description:zinc finger CCCH-type containing, antiviral 1 [Source:HGNC Symbol;Acc:HGNC:23721]	FALSE	TRUE	4.49219	5	13	5	High	High	High	High	Phospho [S275(100); S284(100); S310(93.4); S378(99.9)]	14.48
High	ENSP00000487548.1	pep chromosome:GRCh38:2:232697305:232860575:1 gene:ENSG00000204120.14 transcript:ENST00000629305.2 gene_biotype:protein_coding transcript_biotype:protein_coding gene_symbol:GIGYF2 description:GRB10 interacting GYF protein 2 [Source:HGNC Symbol;Acc:HGNC:11960]	FALSE	TRUE	8.09992	5	13	5	High	High	High	High	Phospho [S26(93); S160(99.3); S258(100)]	17.38
High	ENSP00000380921.3	pep chromosome:GRCh38:X:19533977:19887600:-1 gene:ENSG00000147010.18 transcript:ENST00000397821.8 gene_biotype:protein_coding transcript_biotype:protein_coding gene_symbol:SH3KBP1 description:SH3 domain containing kinase binding protein 1 [Source:HGNC Symbol;Acc:HGNC:13867]	FALSE	TRUE	6.46617	3	10	3	High	High	High	High	Phospho [S183(100); S230(100)]	23.82
High	ENSP00000342905.3	pep chromosome:GRCh38:20:50890349:50909791:-1 gene:ENSG00000101126.17 transcript:ENST00000349014.8 gene_biotype:protein_coding transcript_biotype:protein_coding gene_symbol:ADNP description:activity dependent neuroprotector homeobox [Source:HGNC Symbol;Acc:HGNC:15766]	FALSE	TRUE	4.08348	4	8	4	High	High	High	High	Phospho [S98(100); S921(100); S953(99.6)]	18.78
High	ENSP00000354125.4	pep chromosome:GRCh38:7:2354827:2380745:1 gene:ENSG00000106263.18 transcript:ENST00000360876.9 gene_biotype:protein_coding transcript_biotype:protein_coding gene_symbol:EIF3B description:eukaryotic translation initiation factor 3 subunit B [Source:HGNC Symbol;Acc:HGNC:3280]	FALSE	TRUE	7.86241	3	7	3	High	High	High	High	Phospho [S83(80.6); S119(100)]	20.87
High	ENSP00000479037.1	pep chromosome:GRCh38:2:54456317:54671445:1 gene:ENSG00000115306.16 transcript:ENST00000615901.4 gene_biotype:protein_coding transcript_biotype:protein_coding gene_symbol:SPTBN1 description:spectrin beta, non-erythrocytic 1 [Source:HGNC Symbol;Acc:HGNC:11275]	FALSE	TRUE	2.70499	6	17	6	High	High	High	High	Phospho [S2104(100); S2140(100); S2167(90.6); S2171(97.7); S2343(98.4)]	41.75
High	ENSP00000486285.1	pep chromosome:GRCh38:13:98143098:98449771:1 gene:ENSG00000152767.17 transcript:ENST00000627049.2 gene_biotype:protein_coding transcript_biotype:protein_coding gene_symbol:FARP1 description:FERM, ARH/RhoGEF and pleckstrin domain protein 1 [Source:HGNC Symbol;Acc:HGNC:3591]	FALSE	TRUE	4.36803	4	7	4	High	High	High	High	Phospho [S433(100); S920(99.5); S930(88.7)]	21.78
High	ENSP00000481626.1	pep chromosome:GRCh38:18:46174034:46266992:1 gene:ENSG00000152242.11 transcript:ENST00000615052.5 gene_biotype:protein_coding transcript_biotype:protein_coding gene_symbol:C18orf25 description:chromosome 18 open reading frame 25 [Source:HGNC Symbol;Acc:HGNC:28172]	FALSE	TRUE	8.16832	2	5	2	High	High	High	High	Phospho [S66(99.6); S145(99.7)]	17.37
High	ENSP00000394510.1	pep chromosome:GRCh38:19:49591182:49626439:1 gene:ENSG00000126464.14 transcript:ENST00000418929.7 gene_biotype:protein_coding transcript_biotype:protein_coding gene_symbol:PRR12 description:proline rich 12 [Source:HGNC Symbol;Acc:HGNC:29217]	FALSE	TRUE	5.64833	7	8	7	High	High	High	High	Phospho [S332(99.9); S651(100); S917(100); S1135(99.2); S1308(100); T1561(100); S1568(100)]	22.84
High	ENSP00000264758.6	pep chromosome:GRCh38:4:2843857:2930073:1 gene:ENSG00000087274.17 transcript:ENST00000264758.11 gene_biotype:protein_coding transcript_biotype:protein_coding gene_symbol:ADD1 description:adducin 1 [Source:HGNC Symbol;Acc:HGNC:243]	FALSE	TRUE	8.33333	4	7	3	High	High	High	High	Phospho [S358(100); S431(98.4); S757(100)]	23.05
High	ENSP00000476603.1	pep chromosome:GRCh38:4:89236383:89307800:-1 gene:ENSG00000185477.5 transcript:ENST00000609438.2 gene_biotype:protein_coding transcript_biotype:protein_coding gene_symbol:GPRIN3 description:GPRIN family member 3 [Source:HGNC Symbol;Acc:HGNC:27733]	FALSE	TRUE	8.50515	5	12	5	High	High	High	High	Phospho [S32(100); S542(100); S583(100); S734(95.5); S737(100)]	20.35
High	ENSP00000343421.3	pep chromosome:GRCh38:5:96662073:96773233:1 gene:ENSG00000153113.23 transcript:ENST00000338252.7 gene_biotype:protein_coding transcript_biotype:protein_coding gene_symbol:CAST description:calpastatin [Source:HGNC Symbol;Acc:HGNC:1515]	FALSE	TRUE	13.9568	5	6	1	High	High	High	High	Phospho [S230(100)]	19.43
High	ENSP00000348933.4	pep chromosome:GRCh38:8:27733316:27772640:-1 gene:ENSG00000147419.18 transcript:ENST00000356537.9 gene_biotype:protein_coding transcript_biotype:protein_coding gene_symbol:CCDC25 description:coiled-coil domain containing 25 [Source:HGNC Symbol;Acc:HGNC:25591]	FALSE	TRUE	8.17308	1	28	1	High	High	High	High	Phospho [S204(100)]	110.46
High	ENSP00000387997.1	pep chromosome:GRCh38:6:99399964:99425331:-1 gene:ENSG00000132424.16 transcript:ENST00000438806.5 gene_biotype:protein_coding transcript_biotype:protein_coding gene_symbol:PNISR description:PNN interacting serine and arginine rich protein [Source:HGNC Symbol;Acc:HGNC:21222]	FALSE	TRUE	10.3106	6	8	6	High	High	High	High	Phospho [S211(100); S290(100); S313(100); S321(100); T410(100); S601(99.8); S767(99)]	25.01
High	ENSP00000382382.2	pep chromosome:GRCh38:11:11842066:11959323:1 gene:ENSG00000170242.18 transcript:ENST00000399455.2 gene_biotype:protein_coding transcript_biotype:protein_coding gene_symbol:USP47 description:ubiquitin specific peptidase 47 [Source:HGNC Symbol;Acc:HGNC:20076]	FALSE	TRUE	3.85455	3	13	3	High	High	High	High	Phospho [S832(100); S910(100); T1015(89)]	37.55
High	ENSP00000228136.4	pep chromosome:GRCh38:11:16738647:16758340:1 gene:ENSG00000110696.10 transcript:ENST00000228136.9 gene_biotype:protein_coding transcript_biotype:protein_coding gene_symbol:C11orf58 description:chromosome 11 open reading frame 58 [Source:HGNC Symbol;Acc:HGNC:16990]	FALSE	TRUE	12.5683	1	14	1	High	High	High	High	Phospho [S17(99.7)]	57.77
High	ENSP00000309432.4	pep chromosome:GRCh38:17:42579515:42609374:-1 gene:ENSG00000141699.11 transcript:ENST00000309428.10 gene_biotype:protein_coding transcript_biotype:protein_coding gene_symbol:RETREG3 description:reticulophagy regulator family member 3 [Source:HGNC Symbol;Acc:HGNC:27258]	FALSE	TRUE	17.5966	3	9	3	High	High	High	High	Phospho [S260(99.2); S320(100)]	31.67
High	ENSP00000256707.3	pep chromosome:GRCh38:2:8728857:8837625:-1 gene:ENSG00000134313.15 transcript:ENST00000256707.7 gene_biotype:protein_coding transcript_biotype:protein_coding gene_symbol:KIDINS220 description:kinase D interacting substrate 220 [Source:HGNC Symbol;Acc:HGNC:29508]	FALSE	TRUE	2.31508	3	10	3	High	High	High	High	Phospho [S918(100); S1521(100); S1526(92.8); S1555(99.9)]	22.24
High	ENSP00000352438.5	pep chromosome:GRCh38:12:53452129:53479832:1 gene:ENSG00000197111.15 transcript:ENST00000359462.9 gene_biotype:protein_coding transcript_biotype:protein_coding gene_symbol:PCBP2 description:poly(rC) binding protein 2 [Source:HGNC Symbol;Acc:HGNC:8648]	FALSE	TRUE	16.6667	4	9	3	High	High	High	High	Phospho [S173(100); S189(84.2); S365(94.6)]	16.53
High	ENSP00000364912.3	pep chromosome:GRCh38:1:15847707:15940456:1 gene:ENSG00000065526.11 transcript:ENST00000375759.8 gene_biotype:protein_coding transcript_biotype:protein_coding gene_symbol:SPEN description:spen family transcriptional repressor [Source:HGNC Symbol;Acc:HGNC:17575]	FALSE	TRUE	2.9476	7	10	7	High	High	High	High	Phospho [S736(100); S740(100); S749(100); S1261(99.6); S1380(100); S1382(100); S1918(98); S2101(100)]	17.3
High	ENSP00000377681.3	pep chromosome:GRCh38:5:151771910:151812785:1 gene:ENSG00000145907.15 transcript:ENST00000394123.7 gene_biotype:protein_coding transcript_biotype:protein_coding gene_symbol:G3BP1 description:G3BP stress granule assembly factor 1 [Source:HGNC Symbol;Acc:HGNC:30292]	FALSE	TRUE	9.65665	2	25	2	High	High	High	High	Phospho [S149(100); S230(89.8)]	56.68
High	ENSP00000391278.3	pep chromosome:GRCh38:17:76734252:76737331:-1 gene:ENSG00000161547.16 transcript:ENST00000452355.7 gene_biotype:protein_coding transcript_biotype:nonsense_mediated_decay gene_symbol:SRSF2 description:serine and arginine rich splicing factor 2 [Source:HGNC Symbol;Acc:HGNC:10783]	FALSE	TRUE	31.2217	8	16	6	High	High	High	High	Phospho [S119(100); S121(100); S161(92.8); S163(99.4); S165(100); S175(91); S179(92); S181(100); S187(100); S191(100); S206(99.9); S208(99.9); S221(99.8)]	22.05
High	ENSP00000341826.6	pep chromosome:GRCh38:12:54280755:54285214:1 gene:ENSG00000135486.17 transcript:ENST00000340913.10 gene_biotype:protein_coding transcript_biotype:protein_coding gene_symbol:HNRNPA1 description:heterogeneous nuclear ribonucleoprotein A1 [Source:HGNC Symbol;Acc:HGNC:5031]	FALSE	TRUE	10.4839	3	10	3	High	High	High	High	Phospho [S6(100)]	23.09
High	ENSP00000422319.1	pep chromosome:GRCh38:5:139274104:139330428:1 gene:ENSG00000280987.4 transcript:ENST00000502929.5 gene_biotype:protein_coding transcript_biotype:protein_coding gene_symbol:MATR3 description:matrin 3 [Source:NCBI gene;Acc:9782]	FALSE	TRUE	6.25698	7	16	7	High	High	High	High	Phospho [S195(100); S598(93.8); S604(94.1); S631(100)]	25.17
High	ENSP00000334642.5	pep chromosome:GRCh38:10:117277274:117375440:-1 gene:ENSG00000165650.12 transcript:ENST00000334464.7 gene_biotype:protein_coding transcript_biotype:protein_coding gene_symbol:PDZD8 description:PDZ domain containing 8 [Source:HGNC Symbol;Acc:HGNC:26974]	FALSE	TRUE	4.67938	4	7	4	High	High	High	High	Phospho [S521(91.4); S538(100); S980(100)]	19.98
High	ENSP00000331983.6	pep chromosome:GRCh38:6:25279374:25620530:1 gene:ENSG00000079691.18 transcript:ENST00000329474.7 gene_biotype:protein_coding transcript_biotype:protein_coding gene_symbol:CARMIL1 description:capping protein regulator and myosin 1 linker 1 [Source:HGNC Symbol;Acc:HGNC:21581]	FALSE	TRUE	5.83516	7	17	7	High	High	High	High	Phospho [S968(94.4); S1094(88.3); S1148(91.1); S1315(99.5); S1360(100)]	21.7
High	ENSP00000431150.1	pep chromosome:GRCh38:14:73058532:73120391:1 gene:ENSG00000119707.14 transcript:ENST00000527432.5 gene_biotype:protein_coding transcript_biotype:protein_coding gene_symbol:RBM25 description:RNA binding motif protein 25 [Source:HGNC Symbol;Acc:HGNC:23244]	FALSE	TRUE	3.79597	3	8	3	High	High	High	High	Phospho [S583(100); S675(90.4)]	16.04
High	ENSP00000428426.2	pep chromosome:GRCh38:8:53966556:54022448:-1 gene:ENSG00000187735.14 transcript:ENST00000521604.7 gene_biotype:protein_coding transcript_biotype:protein_coding gene_symbol:TCEA1 description:transcription elongation factor A1 [Source:HGNC Symbol;Acc:HGNC:11612]	FALSE	TRUE	4.98339	3	9	3	High	High	High	High	Phospho [S100(100)]	28.32
High	ENSP00000355890.3	pep chromosome:GRCh38:1:219968600:220046505:-1 gene:ENSG00000136628.18 transcript:ENST00000366923.8 gene_biotype:protein_coding transcript_biotype:protein_coding gene_symbol:EPRS description:glutamyl-prolyl-tRNA synthetase [Source:HGNC Symbol;Acc:HGNC:3418]	FALSE	TRUE	1.25661	1	27	1	High	High	High	High	Phospho [S886(99.2)]	37.56
High	ENSP00000352091.5	pep chromosome:GRCh38:11:3675011:3797792:-1 gene:ENSG00000110713.17 transcript:ENST00000359171.8 gene_biotype:protein_coding transcript_biotype:protein_coding gene_symbol:NUP98 description:nucleoporin 98 [Source:HGNC Symbol;Acc:HGNC:8068]	FALSE	TRUE	3.35718	4	12	4	High	High	High	High	Phospho [S623(91.4); S888(100); S1028(100)]	33.68
High	ENSP00000494552.1	pep chromosome:GRCh38:17:27456470:27626435:1 gene:ENSG00000141068.14 transcript:ENST00000644974.1 gene_biotype:protein_coding transcript_biotype:protein_coding gene_symbol:KSR1 description:kinase suppressor of ras 1 [Source:HGNC Symbol;Acc:HGNC:6465]	FALSE	TRUE	9.59052	5	6	5	High	High	High	High	Phospho [T270(100); T288(100); S334(100); S406(100); S547(100)]	18.41
High	ENSP00000357448.3	pep chromosome:GRCh38:1:154944080:154956099:-1 gene:ENSG00000163346.17 transcript:ENST00000368463.8 gene_biotype:protein_coding transcript_biotype:protein_coding gene_symbol:PBXIP1 description:PBX homeobox interacting protein 1 [Source:HGNC Symbol;Acc:HGNC:21199]	FALSE	TRUE	4.10397	3	6	3	High	High	High	High	Phospho [S43(92.8); S146(100); S147(100); S148(100)]	28.13
High	ENSP00000302961.2	pep chromosome:GRCh38:5:133052013:133106449:1 gene:ENSG00000170606.15 transcript:ENST00000304858.7 gene_biotype:protein_coding transcript_biotype:protein_coding gene_symbol:HSPA4 description:heat shock protein family A (Hsp70) member 4 [Source:HGNC Symbol;Acc:HGNC:5237]	FALSE	TRUE	11.5476	5	6	5	High	High	High	High	Phospho [S76(100); T649(91.5)]	18.98
High	ENSP00000280557.6	pep chromosome:GRCh38:12:122752824:122771064:1 gene:ENSG00000139726.11 transcript:ENST00000280557.11 gene_biotype:protein_coding transcript_biotype:protein_coding gene_symbol:DENR description:density regulated re-initiation and release factor [Source:HGNC Symbol;Acc:HGNC:2769]	FALSE	TRUE	13.6364	3	7	3	High	High	High	High	Phospho [S73(99.9)]	24.22
High	ENSP00000372924.3	pep chromosome:GRCh38:18:9475513:9538114:1 gene:ENSG00000017797.13 transcript:ENST00000383432.8 gene_biotype:protein_coding transcript_biotype:protein_coding gene_symbol:RALBP1 description:ralA binding protein 1 [Source:HGNC Symbol;Acc:HGNC:9841]	FALSE	TRUE	6.41221	4	13	4	High	High	High	High	Phospho [S92(100); S93(100); S645(99.8)]	25.84
High	ENSP00000315700.4	pep chromosome:GRCh38:21:36385392:36419015:1 gene:ENSG00000159259.8 transcript:ENST00000314103.6 gene_biotype:protein_coding transcript_biotype:protein_coding gene_symbol:CHAF1B description:chromatin assembly factor 1 subunit B [Source:HGNC Symbol;Acc:HGNC:1911]	FALSE	TRUE	15.7424	4	15	4	High	High	High	High	Phospho [S409(88.9); T433(98.9); S458(100); S538(100)]	24.16
High	ENSP00000303482.3	pep chromosome:GRCh38:8:22138020:22141907:-1 gene:ENSG00000168476.12 transcript:ENST00000306306.8 gene_biotype:protein_coding transcript_biotype:protein_coding gene_symbol:REEP4 description:receptor accessory protein 4 [Source:HGNC Symbol;Acc:HGNC:26176]	FALSE	TRUE	11.6732	2	19	2	High	High	High	High	Phospho [S257(100)]	46.63
High	ENSP00000372681.4	pep chromosome:GRCh38:CHR_HSCHR6_MHC_QBL_CTG1:33247394:33251851:-1 gene:ENSG00000206279.10 transcript:ENST00000383194.8 gene_biotype:protein_coding transcript_biotype:protein_coding gene_symbol:DAXX description:death domain associated protein [Source:HGNC Symbol;Acc:HGNC:2681]	FALSE	TRUE	10.5405	4	9	4	High	High	High	High	Phospho [S495(98.3); S671(98.8); S739(93.7)]	20.16
High	ENSP00000360034.2	pep chromosome:GRCh38:1:67411038:67430386:-1 gene:ENSG00000142864.14 transcript:ENST00000370995.6 gene_biotype:protein_coding transcript_biotype:protein_coding gene_symbol:SERBP1 description:SERPINE1 mRNA binding protein 1 [Source:HGNC Symbol;Acc:HGNC:17860]	FALSE	TRUE	13.9706	5	15	5	High	High	High	High	Phospho [S234(100); S394(99.2)]	25.92
High	ENSP00000443988.1	pep chromosome:GRCh38:12:118376555:118418033:1 gene:ENSG00000111707.12 transcript:ENST00000543473.2 gene_biotype:protein_coding transcript_biotype:protein_coding gene_symbol:SUDS3 description:SDS3 homolog, SIN3A corepressor complex component [Source:HGNC Symbol;Acc:HGNC:29545]	FALSE	TRUE	12.1951	2	8	2	High	High	High	High	Phospho [S45(100); S53(99.6); S234(94.6)]	29.03
High	ENSP00000221566.1	pep chromosome:GRCh38:19:2754715:2783273:-1 gene:ENSG00000104969.10 transcript:ENST00000221566.7 gene_biotype:protein_coding transcript_biotype:protein_coding gene_symbol:SGTA description:small glutamine rich tetratricopeptide repeat containing alpha [Source:HGNC Symbol;Acc:HGNC:10819]	FALSE	TRUE	11.8211	4	13	4	High	High	High	High	Phospho [S77(100); T81(100); S301(100); S305(94.7)]	25.5
High	ENSP00000349305.4	pep chromosome:GRCh38:3:37243252:37366745:1 gene:ENSG00000144674.16 transcript:ENST00000356847.8 gene_biotype:protein_coding transcript_biotype:protein_coding gene_symbol:GOLGA4 description:golgin A4 [Source:HGNC Symbol;Acc:HGNC:4427]	FALSE	TRUE	2.8979	5	17	5	High	High	High	High	Phospho [S41(87.4); S100(100); S120(99.4); S288(100)]	23.97
High	ENSP00000302886.6	pep chromosome:GRCh38:12:56104559:56113910:1 gene:ENSG00000170515.14 transcript:ENST00000303305.11 gene_biotype:protein_coding transcript_biotype:protein_coding gene_symbol:PA2G4 description:proliferation-associated 2G4 [Source:HGNC Symbol;Acc:HGNC:8550]	FALSE	TRUE	4.56853	1	10	1	High	High	High	High	Phospho [S383(100)]	33.92
High	ENSP00000313199.7	pep chromosome:GRCh38:4:82352498:82373991:-1 gene:ENSG00000138668.19 transcript:ENST00000313899.12 gene_biotype:protein_coding transcript_biotype:protein_coding gene_symbol:HNRNPD description:heterogeneous nuclear ribonucleoprotein D [Source:HGNC Symbol;Acc:HGNC:5036]	FALSE	TRUE	5.07042	2	15	2	High	High	High	High	Phospho [S83(99.8)]	14.25
High	ENSP00000479913.1	pep chromosome:GRCh38:12:42326149:42446618:1 gene:ENSG00000134283.18 transcript:ENST00000610488.4 gene_biotype:protein_coding transcript_biotype:protein_coding gene_symbol:PPHLN1 description:periphilin 1 [Source:HGNC Symbol;Acc:HGNC:19369]	FALSE	TRUE	5.24017	3	16	3	High	High	High	High	Phospho [S140(100)]	22.22
High	ENSP00000384026.2	pep chromosome:GRCh38:12:65824131:65966295:1 gene:ENSG00000149948.13 transcript:ENST00000403681.6 gene_biotype:protein_coding transcript_biotype:protein_coding gene_symbol:HMGA2 description:high mobility group AT-hook 2 [Source:HGNC Symbol;Acc:HGNC:5009]	FALSE	TRUE	29.3578	3	12	3	High	High	High	High	Phospho [S44(100); S101(99.8); S105(96)]	23.46
High	ENSP00000416015.2	pep chromosome:GRCh38:22:17787649:18024561:-1 gene:ENSG00000243156.9 transcript:ENST00000441493.7 gene_biotype:protein_coding transcript_biotype:protein_coding gene_symbol:MICAL3 description:microtubule associated monooxygenase, calponin and LIM domain containing 3 [Source:HGNC Symbol;Acc:HGNC:24694]	FALSE	TRUE	2.5974	6	17	6	High	High	High	High	Phospho [S977(100); S1221(100); S1649(94.6)]	24.06
High	ENSP00000328228.3	pep chromosome:GRCh38:8:25459233:25507911:1 gene:ENSG00000184661.14 transcript:ENST00000330560.8 gene_biotype:protein_coding transcript_biotype:protein_coding gene_symbol:CDCA2 description:cell division cycle associated 2 [Source:HGNC Symbol;Acc:HGNC:14623]	FALSE	TRUE	6.84262	5	7	5	High	High	High	High	Phospho [S400(90.6); S710(99.4); S756(100)]	19.02
High	ENSP00000396673.2	pep chromosome:GRCh38:17:63819433:63827663:-1 gene:ENSG00000108592.17 transcript:ENST00000427159.7 gene_biotype:protein_coding transcript_biotype:protein_coding gene_symbol:FTSJ3 description:FtsJ RNA 2'-O-methyltransferase 3 [Source:HGNC Symbol;Acc:HGNC:17136]	FALSE	TRUE	9.4451	4	15	4	High	High	High	High	Phospho [S335(100); S336(100); S584(99.6); S624(77.9); S644(100)]	35.06
High	ENSP00000261622.4	pep chromosome:GRCh38:16:87830023:87869507:-1 gene:ENSG00000103257.9 transcript:ENST00000261622.5 gene_biotype:protein_coding transcript_biotype:protein_coding gene_symbol:SLC7A5 description:solute carrier family 7 member 5 [Source:HGNC Symbol;Acc:HGNC:11063]	FALSE	TRUE	6.31164	2	11	2	High	High	High	High	Phospho [S35(93.6)]	33.59
High	ENSP00000350518.3	pep chromosome:GRCh38:4:75644389:75673401:-1 gene:ENSG00000138757.14 transcript:ENST00000357854.7 gene_biotype:protein_coding transcript_biotype:protein_coding gene_symbol:G3BP2 description:G3BP stress granule assembly factor 2 [Source:HGNC Symbol;Acc:HGNC:30291]	FALSE	TRUE	10.6904	2	16	1	High	High	High	High	Phospho [S149(100)]	24.09
High	ENSP00000337838.6	pep chromosome:GRCh38:2:54972189:55050451:-1 gene:ENSG00000115310.18 transcript:ENST00000337526.11 gene_biotype:protein_coding transcript_biotype:protein_coding gene_symbol:RTN4 description:reticulon 4 [Source:HGNC Symbol;Acc:HGNC:14085]	FALSE	TRUE	9.98322	5	12	1	High	High	High	High	Acetyl [N-Term]; Phospho [S15(83); S107(99.9); S181(86.4)]	24.17
High	ENSP00000471367.1	pep chromosome:GRCh38:19:17075786:17213284:1 gene:ENSG00000099331.13 transcript:ENST00000594824.5 gene_biotype:protein_coding transcript_biotype:protein_coding gene_symbol:MYO9B description:myosin IXB [Source:HGNC Symbol;Acc:HGNC:7609]	FALSE	TRUE	5.05331	7	9	7	High	High	High	High	Phospho [S717(86.6); S1122(100); S1267(100); T1271(100); S1290(100); T1346(99.4); S1992(100)]	21.64
High	ENSP00000354720.4	pep chromosome:GRCh38:10:110567691:110604636:1 gene:ENSG00000108055.9 transcript:ENST00000361804.4 gene_biotype:protein_coding transcript_biotype:protein_coding gene_symbol:SMC3 description:structural maintenance of chromosomes 3 [Source:HGNC Symbol;Acc:HGNC:2468]	FALSE	TRUE	1.72555	2	6	2	High	High	High	High	Phospho [S1067(100)]	19.4
High	ENSP00000300651.6	pep chromosome:GRCh38:17:39404285:39451263:-1 gene:ENSG00000125686.12 transcript:ENST00000300651.11 gene_biotype:protein_coding transcript_biotype:protein_coding gene_symbol:MED1 description:mediator complex subunit 1 [Source:HGNC Symbol;Acc:HGNC:9234]	FALSE	TRUE	5.75585	6	11	6	High	High	High	High	Phospho [T805(100); S1000(100); S1156(89.4)]	20.14
High	ENSP00000261173.2	pep chromosome:GRCh38:12:89588051:89656067:-1 gene:ENSG00000070961.15 transcript:ENST00000261173.6 gene_biotype:protein_coding transcript_biotype:protein_coding gene_symbol:ATP2B1 description:ATPase plasma membrane Ca2+ transporting 1 [Source:HGNC Symbol;Acc:HGNC:814]	FALSE	TRUE	4.2623	5	14	5	High	High	High	High	Phospho [S1155(99.7); S1178(93.9); S1182(100); S1211(88.3)]	16.61
High	ENSP00000382091.4	pep chromosome:GRCh38:17:18183828:18209954:1 gene:ENSG00000091542.9 transcript:ENST00000399138.5 gene_biotype:protein_coding transcript_biotype:protein_coding gene_symbol:ALKBH5 description:alkB homolog 5, RNA demethylase [Source:HGNC Symbol;Acc:HGNC:25996]	FALSE	TRUE	10.6599	4	7	4	High	High	High	High	Phospho [S64(100); S384(100)]	23.92
High	ENSP00000493594.1	pep chromosome:GRCh38:19:50203634:50310540:1 gene:ENSG00000105357.17 transcript:ENST00000642316.1 gene_biotype:protein_coding transcript_biotype:protein_coding gene_symbol:MYH14 description:myosin heavy chain 14 [Source:HGNC Symbol;Acc:HGNC:23212]	FALSE	TRUE	1.62083	1	9	1	High	High	High	High	Phospho [S2010(100)]	35.46
High	ENSP00000221419.4	pep chromosome:GRCh38:19:38836388:38850333:-1 gene:ENSG00000104824.17 transcript:ENST00000221419.9 gene_biotype:protein_coding transcript_biotype:protein_coding gene_symbol:HNRNPL description:heterogeneous nuclear ribonucleoprotein L [Source:HGNC Symbol;Acc:HGNC:5045]	FALSE	TRUE	12.2241	3	4	3	High	High	High	High	Phospho [S185(99.7)]	13.58
High	ENSP00000383866.4	pep chromosome:GRCh38:1:16367242:16398145:1 gene:ENSG00000055070.17 transcript:ENST00000401088.9 gene_biotype:protein_coding transcript_biotype:protein_coding gene_symbol:SZRD1 description:SUZ RNA binding domain containing 1 [Source:HGNC Symbol;Acc:HGNC:30232]	FALSE	TRUE	30.2632	3	6	3	High	High	High	High	Phospho [S37(87.4); S39(100); S105(98.9)]	11.32
High	ENSP00000395249.2	pep chromosome:GRCh38:2:219178275:219185475:1 gene:ENSG00000144567.11 transcript:ENST00000430297.7 gene_biotype:protein_coding transcript_biotype:protein_coding gene_symbol:RETREG2 description:reticulophagy regulator family member 2 [Source:HGNC Symbol;Acc:HGNC:28450]	FALSE	TRUE	13.628	3	6	3	High	High	High	High	Phospho [S281(90.8); T329(92.2); S385(100)]	22.39
High	ENSP00000344392.5	pep chromosome:GRCh38:16:3501012:3536559:1 gene:ENSG00000103351.13 transcript:ENST00000341633.9 gene_biotype:protein_coding transcript_biotype:protein_coding gene_symbol:CLUAP1 description:clusterin associated protein 1 [Source:HGNC Symbol;Acc:HGNC:19009]	FALSE	TRUE	8.33333	3	5	3	High	High	High	High	Phospho [S324(99.5); S428(100)]	16.26
High	ENSP00000358770.3	pep chromosome:GRCh38:10:103967140:104029233:1 gene:ENSG00000065613.15 transcript:ENST00000369755.4 gene_biotype:protein_coding transcript_biotype:protein_coding gene_symbol:SLK description:STE20 like kinase [Source:HGNC Symbol;Acc:HGNC:11088]	FALSE	TRUE	3.64372	3	6	3	High	High	High	High	Phospho [S189(100); S571(100)]	20.96
High	ENSP00000322147.7	pep chromosome:GRCh38:2:54972189:55050544:-1 gene:ENSG00000115310.18 transcript:ENST00000317610.11 gene_biotype:protein_coding transcript_biotype:protein_coding gene_symbol:RTN4 description:reticulon 4 [Source:HGNC Symbol;Acc:HGNC:14085]	FALSE	TRUE	29.7587	5	10	1	High	High	High	High	Acetyl [N-Term]; Phospho [S15(83); S107(99.9); S181(99.7)]	23.21
High	ENSP00000369777.5	pep chromosome:GRCh38:16:30524004:30526566:-1 gene:ENSG00000169957.10 transcript:ENST00000380412.7 gene_biotype:protein_coding transcript_biotype:protein_coding gene_symbol:ZNF768 description:zinc finger protein 768 [Source:HGNC Symbol;Acc:HGNC:26273]	FALSE	TRUE	12.963	6	12	5	High	High	High	High	Phospho [S83(100); S107(88.7); S118(89.8); S125(100); S139(100); S160(94.7); T284(100)]	25.52
High	ENSP00000457723.1	pep chromosome:GRCh38:16:2253130:2267603:-1 gene:ENSG00000205937.12 transcript:ENST00000565678.5 gene_biotype:protein_coding transcript_biotype:protein_coding gene_symbol:RNPS1 description:RNA binding protein with serine rich domain 1 [Source:HGNC Symbol;Acc:HGNC:10080]	FALSE	TRUE	22.623	5	16	4	High	High	High	High	Phospho [S93(94.2); S125(91.8); S274(100); S276(100)]	14.09
High	ENSP00000393313.1	pep chromosome:GRCh38:19:16355247:16471970:-1 gene:ENSG00000127527.14 transcript:ENST00000455140.7 gene_biotype:protein_coding transcript_biotype:protein_coding gene_symbol:EPS15L1 description:epidermal growth factor receptor pathway substrate 15 like 1 [Source:HGNC Symbol;Acc:HGNC:24634]	FALSE	TRUE	11.2088	4	9	4	High	High	High	High	Phospho [S229(100); T366(99.3); S575(84.4)]	23.27
High	ENSP00000390968.1	pep chromosome:GRCh38:3:196229842:196270541:-1 gene:ENSG00000161217.12 transcript:ENST00000419333.5 gene_biotype:protein_coding transcript_biotype:protein_coding gene_symbol:PCYT1A description:phosphate cytidylyltransferase 1, choline, alpha [Source:HGNC Symbol;Acc:HGNC:8754]	FALSE	TRUE	10	4	11	4	High	High	High	High	Phospho [S315(100); S319(99.9); S331(95.3); S347(100)]	24.33
High	ENSP00000256429.3	pep chromosome:GRCh38:18:54151606:54224669:-1 gene:ENSG00000134046.12 transcript:ENST00000256429.8 gene_biotype:protein_coding transcript_biotype:protein_coding gene_symbol:MBD2 description:methyl-CpG binding domain protein 2 [Source:HGNC Symbol;Acc:HGNC:6917]	FALSE	TRUE	4.13625	1	6	1	High	High	High	High	Phospho [S407(100)]	28.92
High	ENSP00000295926.3	pep chromosome:GRCh38:3:157147553:157160213:-1 gene:ENSG00000163660.11 transcript:ENST00000295926.7 gene_biotype:protein_coding transcript_biotype:protein_coding gene_symbol:CCNL1 description:cyclin L1 [Source:HGNC Symbol;Acc:HGNC:20569]	FALSE	TRUE	9.12548	3	8	3	High	High	High	High	Phospho [S352(100); S445(100)]	13.88
High	ENSP00000368565.3	pep chromosome:GRCh38:7:103312289:103344767:-1 gene:ENSG00000105821.15 transcript:ENST00000379263.8 gene_biotype:protein_coding transcript_biotype:protein_coding gene_symbol:DNAJC2 description:DnaJ heat shock protein family (Hsp40) member C2 [Source:HGNC Symbol;Acc:HGNC:13192]	FALSE	TRUE	5.31401	2	13	2	High	High	High	High	Phospho [S47(100); S49(100); S63(99.8)]	47.2
High	ENSP00000405068.2	pep chromosome:GRCh38:4:2937936:2963406:-1 gene:ENSG00000087269.16 transcript:ENST00000416614.7 gene_biotype:protein_coding transcript_biotype:protein_coding gene_symbol:NOP14 description:NOP14 nucleolar protein [Source:HGNC Symbol;Acc:HGNC:16821]	FALSE	TRUE	1.63361	1	5	1	High	High	High	High	Phospho [S146(100); S148(100)]	18.21
High	ENSP00000389832.2	pep chromosome:GRCh38:17:35011614:35089315:-1 gene:ENSG00000092871.16 transcript:ENST00000447669.6 gene_biotype:protein_coding transcript_biotype:protein_coding gene_symbol:RFFL description:ring finger and FYVE like domain containing E3 ubiquitin protein ligase [Source:HGNC Symbol;Acc:HGNC:24821]	FALSE	TRUE	10.7438	2	9	2	High	High	High	High	Phospho [S229(98.4); S240(99.6)]	24.5
High	ENSP00000459895.1	pep chromosome:GRCh38:17:57095844:57120570:1 gene:ENSG00000121057.13 transcript:ENST00000572557.5 gene_biotype:protein_coding transcript_biotype:protein_coding gene_symbol:AKAP1 description:A-kinase anchoring protein 1 [Source:HGNC Symbol;Acc:HGNC:367]	FALSE	TRUE	6.42303	3	8	3	High	High	High	High	Phospho [S151(99.9); S429(100); T447(85.3)]	16.42
High	ENSP00000389383.1	pep chromosome:GRCh38:2:219597857:219616451:1 gene:ENSG00000144589.22 transcript:ENST00000456909.6 gene_biotype:protein_coding transcript_biotype:protein_coding gene_symbol:STK11IP description:serine/threonine kinase 11 interacting protein [Source:HGNC Symbol;Acc:HGNC:19184]	FALSE	TRUE	3.21691	3	9	3	High	High	High	High	Phospho [S387(99.4); S482(100); S761(100)]	21.49
High	ENSP00000277570.5	pep chromosome:GRCh38:10:11823356:11872277:1 gene:ENSG00000148426.13 transcript:ENST00000277570.10 gene_biotype:protein_coding transcript_biotype:protein_coding gene_symbol:PROSER2 description:proline and serine rich 2 [Source:HGNC Symbol;Acc:HGNC:23728]	FALSE	TRUE	13.3333	4	13	4	High	High	High	High	Phospho [S166(83.4); S179(100)]	26.08
High	ENSP00000371321.1	pep chromosome:GRCh38:4:39287456:39366375:-1 gene:ENSG00000035928.16 transcript:ENST00000381897.5 gene_biotype:protein_coding transcript_biotype:protein_coding gene_symbol:RFC1 description:replication factor C subunit 1 [Source:HGNC Symbol;Acc:HGNC:9969]	FALSE	TRUE	5.4007	6	14	6	High	High	High	High	Phospho [S73(92.4); T110(94.1); S156(100); S368(100)]	17.85
High	ENSP00000328103.5	pep chromosome:GRCh38:22:31439367:31489842:-1 gene:ENSG00000184708.18 transcript:ENST00000330125.10 gene_biotype:protein_coding transcript_biotype:protein_coding gene_symbol:EIF4ENIF1 description:eukaryotic translation initiation factor 4E nuclear import factor 1 [Source:HGNC Symbol;Acc:HGNC:16687]	FALSE	TRUE	7.1066	6	12	6	High	High	High	High	Phospho [T9(90.7); S11(99); S138(100); S564(100); S951(94.5)]	19.57
High	ENSP00000417518.2	pep chromosome:GRCh38:3:33496993:33659441:-1 gene:ENSG00000163539.17 transcript:ENST00000480013.6 gene_biotype:protein_coding transcript_biotype:protein_coding gene_symbol:CLASP2 description:cytoplasmic linker associated protein 2 [Source:HGNC Symbol;Acc:HGNC:17078]	FALSE	TRUE	4.71406	5	10	5	High	High	High	High	Phospho [S370(97.1); T540(90.7); S596(100)]	13.8
High	ENSP00000411821.2	pep chromosome:GRCh38:17:19737988:19745459:-1 gene:ENSG00000108602.18 transcript:ENST00000457500.6 gene_biotype:protein_coding transcript_biotype:protein_coding gene_symbol:ALDH3A1 description:aldehyde dehydrogenase 3 family member A1 [Source:HGNC Symbol;Acc:HGNC:405]	FALSE	TRUE	12.8035	5	10	5	High	High	High	High	Phospho [S446(100)]	21
High	ENSP00000340836.6	pep chromosome:GRCh38:9:75088514:75147265:1 gene:ENSG00000134996.12 transcript:ENST00000346234.7 gene_biotype:protein_coding transcript_biotype:protein_coding gene_symbol:OSTF1 description:osteoclast stimulating factor 1 [Source:HGNC Symbol;Acc:HGNC:8510]	FALSE	TRUE	7.00935	1	8	1	High	High	High	High	Phospho [S213(100)]	35.05
High	ENSP00000307705.3	pep chromosome:GRCh38:6:26156354:26157107:1 gene:ENSG00000168298.6 transcript:ENST00000304218.5 gene_biotype:protein_coding transcript_biotype:protein_coding gene_symbol:HIST1H1E description:histone cluster 1 H1 family member e [Source:HGNC Symbol;Acc:HGNC:4718]	FALSE	TRUE	19.6347	6	11	5	High	High	High	High	Phospho [S104(92.3); S172(100); S187(100)]	10.06
High	ENSP00000478059.1	pep chromosome:GRCh38:11:3855703:4093210:1 gene:ENSG00000167323.11 transcript:ENST00000616714.4 gene_biotype:protein_coding transcript_biotype:protein_coding gene_symbol:STIM1 description:stromal interaction molecule 1 [Source:HGNC Symbol;Acc:HGNC:11386]	FALSE	TRUE	6.32111	5	11	5	High	High	High	High	Phospho [S681(100); S724(89.5); S766(100)]	27.53
High	ENSP00000424852.1	pep chromosome:GRCh38:5:58973688:59768645:-1 gene:ENSG00000113448.19 transcript:ENST00000507116.5 gene_biotype:protein_coding transcript_biotype:protein_coding gene_symbol:PDE4D description:phosphodiesterase 4D [Source:HGNC Symbol;Acc:HGNC:8783]	FALSE	TRUE	6.97987	4	11	4	High	High	High	High	Phospho [S55(100); S59(100); S138(100); S651(99.8)]	27.17
High	ENSP00000370517.4	pep chromosome:GRCh38:10:3067548:3136802:1 gene:ENSG00000067057.17 transcript:ENST00000381125.9 gene_biotype:protein_coding transcript_biotype:protein_coding gene_symbol:PFKP description:phosphofructokinase, platelet [Source:HGNC Symbol;Acc:HGNC:8878]	FALSE	TRUE	6.25	3	4	3	High	High	High	High	Phospho [S386(100)]	16.01
High	P15559	NAD(P)H dehydrogenase [quinone] 1 OS=Homo sapiens GN=NQO1 PE=1 SV=1	TRUE	TRUE	20.073	5	6	5	High	High	High	High	Phospho [S82(100)]	19.51
High	ENSP00000300146.9	pep chromosome:GRCh38:11:59636716:59669037:-1 gene:ENSG00000166889.14 transcript:ENST00000300146.10 gene_biotype:protein_coding transcript_biotype:protein_coding gene_symbol:PATL1 description:PAT1 homolog 1, processing body mRNA decay factor [Source:HGNC Symbol;Acc:HGNC:26721]	FALSE	TRUE	2.85714	3	14	3	High	High	High	High	Phospho [S177(93.5); T194(100)]	26.95
High	ENSP00000358810.3	pep chromosome:GRCh38:1:110034624:110054641:1 gene:ENSG00000143093.15 transcript:ENST00000369795.8 gene_biotype:protein_coding transcript_biotype:protein_coding gene_symbol:STRIP1 description:striatin interacting protein 1 [Source:HGNC Symbol;Acc:HGNC:25916]	FALSE	TRUE	4.54002	2	5	2	High	High	High	High	Phospho [S59(99.6); S335(93.8)]	20.44
High	ENSP00000290291.6	pep chromosome:GRCh38:20:62804835:62814000:1 gene:ENSG00000060491.16 transcript:ENST00000290291.10 gene_biotype:protein_coding transcript_biotype:protein_coding gene_symbol:OGFR description:opioid growth factor receptor [Source:HGNC Symbol;Acc:HGNC:15768]	FALSE	TRUE	7.68095	3	8	3	High	High	High	High	Phospho [S315(100); S349(100); S378(100)]	21.19
High	ENSP00000427985.2	pep chromosome:GRCh38:8:26514031:26658175:1 gene:ENSG00000092964.18 transcript:ENST00000521913.7 gene_biotype:protein_coding transcript_biotype:protein_coding gene_symbol:DPYSL2 description:dihydropyrimidinase like 2 [Source:HGNC Symbol;Acc:HGNC:3014]	FALSE	TRUE	5.76071	4	11	4	High	High	High	High	Phospho [S27(93.6); T614(100); T619(95.7)]	23.72
High	ENSP00000283109.3	pep chromosome:GRCh38:5:97160867:97183247:-1 gene:ENSG00000058729.11 transcript:ENST00000283109.8 gene_biotype:protein_coding transcript_biotype:protein_coding gene_symbol:RIOK2 description:RIO kinase 2 [Source:HGNC Symbol;Acc:HGNC:18999]	FALSE	TRUE	6.52174	2	16	2	High	High	High	High	Phospho [S332(100); S337(93.9)]	32.97
High	ENSP00000494972.1	pep chromosome:GRCh38:19:2100996:2129121:-1 gene:ENSG00000065000.18 transcript:ENST00000644728.1 gene_biotype:protein_coding transcript_biotype:protein_coding gene_symbol:AP3D1 description:adaptor related protein complex 3 subunit delta 1 [Source:HGNC Symbol;Acc:HGNC:568]	FALSE	TRUE	11.746	6	9	6	High	High	High	High	Phospho [S378(99.1); S430(100); S571(91); S661(100)]	18.26
High	ENSP00000456568.1	pep chromosome:GRCh38:15:65530490:65576499:1 gene:ENSG00000074696.13 transcript:ENST00000565299.5 gene_biotype:protein_coding transcript_biotype:protein_coding gene_symbol:HACD3 description:3-hydroxyacyl-CoA dehydratase 3 [Source:HGNC Symbol;Acc:HGNC:24175]	FALSE	TRUE	3	1	22	1	High	High	High	High	Phospho [S152(100)]	64.36
High	ENSP00000331342.4	pep chromosome:GRCh38:8:37858618:37899497:-1 gene:ENSG00000156675.16 transcript:ENST00000330843.9 gene_biotype:protein_coding transcript_biotype:protein_coding gene_symbol:RAB11FIP1 description:RAB11 family interacting protein 1 [Source:HGNC Symbol;Acc:HGNC:30265]	FALSE	TRUE	4.67654	6	16	6	High	High	High	High	Phospho [T281(99.9); S342(99.3); S343(100); S345(100); S356(90.2); S545(99.9)]	18.45
High	ENSP00000353590.3	pep chromosome:GRCh38:17:8474205:8630761:-1 gene:ENSG00000133026.12 transcript:ENST00000360416.7 gene_biotype:protein_coding transcript_biotype:protein_coding gene_symbol:MYH10 description:myosin heavy chain 10 [Source:HGNC Symbol;Acc:HGNC:7568]	FALSE	TRUE	2.79023	4	5	2	High	High	High	High	Phospho [S1987(100); S2006(100)]	15.75
High	ENSP00000483453.1	pep chromosome:GRCh38:17:37514807:37609418:-1 gene:ENSG00000275066.5 transcript:ENST00000612223.5 gene_biotype:protein_coding transcript_biotype:protein_coding gene_symbol:SYNRG description:synergin gamma [Source:HGNC Symbol;Acc:HGNC:557]	FALSE	TRUE	3.57686	5	8	5	High	High	High	High	Phospho [S752(100); S935(87.9); S1075(100)]	15.81
High	ENSP00000384109.3	pep chromosome:GRCh38:X:120526641:120575794:-1 gene:ENSG00000158290.16 transcript:ENST00000404115.7 gene_biotype:protein_coding transcript_biotype:protein_coding gene_symbol:CUL4B description:cullin 4B [Source:HGNC Symbol;Acc:HGNC:2555]	FALSE	TRUE	3.72399	2	6	2	High	High	High	High	Phospho [T49(99.1); T85(99.5)]	14.82
High	ENSP00000366852.2	pep chromosome:GRCh38:13:75284665:75482114:-1 gene:ENSG00000136111.14 transcript:ENST00000377625.6 gene_biotype:protein_coding transcript_biotype:protein_coding gene_symbol:TBC1D4 description:TBC1 domain family member 4 [Source:HGNC Symbol;Acc:HGNC:19165]	FALSE	TRUE	3.40081	3	7	3	High	High	High	High	Phospho [S588(100)]	16.14
High	ENSP00000473384.2	pep chromosome:GRCh38:13:102807146:102876001:1 gene:ENSG00000134899.21 transcript:ENST00000602836.2 gene_biotype:protein_coding transcript_biotype:protein_coding gene_symbol:ERCC5 description:ERCC excision repair 5, endonuclease [Source:HGNC Symbol;Acc:HGNC:3437]	FALSE	TRUE	2.43902	4	8	4	High	High	High	High	Phospho [S795(99.8); S838(100); S1016(99.9); S1017(99.9)]	19.74
High	ENSP00000366434.4	pep chromosome:GRCh38:5:176905005:177006408:-1 gene:ENSG00000087206.17 transcript:ENST00000377227.8 gene_biotype:protein_coding transcript_biotype:protein_coding gene_symbol:UIMC1 description:ubiquitin interaction motif containing 1 [Source:HGNC Symbol;Acc:HGNC:30298]	FALSE	TRUE	4.03338	4	11	4	High	High	High	High	Phospho [S463(99.6); S653(100); S677(100)]	20.08
High	ENSP00000318641.2	pep chromosome:GRCh38:1:153728050:153774808:1 gene:ENSG00000143624.14 transcript:ENST00000318967.7 gene_biotype:protein_coding transcript_biotype:protein_coding gene_symbol:INTS3 description:integrator complex subunit 3 [Source:HGNC Symbol;Acc:HGNC:26153]	FALSE	TRUE	2.68714	4	8	4	High	High	High	High	Phospho [S501(100); S1041(100)]	19.84
High	ENSP00000403817.1	pep chromosome:GRCh38:12:56712428:56725542:-1 gene:ENSG00000196531.11 transcript:ENST00000454682.5 gene_biotype:protein_coding transcript_biotype:protein_coding gene_symbol:NACA description:nascent polypeptide associated complex subunit alpha [Source:HGNC Symbol;Acc:HGNC:7629]	FALSE	TRUE	2.40616	2	33	2	High	High	High	High	Phospho [S2029(99.8)]	84.32
High	ENSP00000304308.3	pep chromosome:GRCh38:20:53567073:53583097:-1 gene:ENSG00000171940.13 transcript:ENST00000302342.3 gene_biotype:protein_coding transcript_biotype:protein_coding gene_symbol:ZNF217 description:zinc finger protein 217 [Source:HGNC Symbol;Acc:HGNC:13009]	FALSE	TRUE	5.34351	4	10	4	High	High	High	High	Phospho [S327(98.4); S329(88.6); S407(93.5); S795(100); S848(100)]	17.88
High	ENSP00000369162.2	pep chromosome:GRCh38:6:7389808:7418037:1 gene:ENSG00000124784.9 transcript:ENST00000379834.7 gene_biotype:protein_coding transcript_biotype:protein_coding gene_symbol:RIOK1 description:RIO kinase 1 [Source:HGNC Symbol;Acc:HGNC:18656]	FALSE	TRUE	2.99296	1	8	1	High	High	High	High	Phospho [S22(99.9)]	17.12
High	ENSP00000334675.3	pep chromosome:GRCh38:X:72204665:72239027:-1 gene:ENSG00000186871.7 transcript:ENST00000334463.4 gene_biotype:protein_coding transcript_biotype:protein_coding gene_symbol:ERCC6L description:ERCC excision repair 6 like, spindle assembly checkpoint helicase [Source:HGNC Symbol;Acc:HGNC:20794]	FALSE	TRUE	4.8	5	11	5	High	High	High	High	Phospho [S1028(100); S1069(100); S1134(100); S1135(100)]	19.47
High	ENSP00000497393.1	pep chromosome:GRCh38:6:34889265:35088963:1 gene:ENSG00000064999.15 transcript:ENST00000649117.1 gene_biotype:protein_coding transcript_biotype:protein_coding gene_symbol:ANKS1A description:ankyrin repeat and sterile alpha motif domain containing 1A [Source:HGNC Symbol;Acc:HGNC:20961]	FALSE	TRUE	3.76884	3	10	3	High	High	High	High	Phospho [S684(89.9)]	14.92
High	ENSP00000431512.1	pep chromosome:GRCh38:8:144291604:144314720:1 gene:ENSG00000185122.11 transcript:ENST00000528838.6 gene_biotype:protein_coding transcript_biotype:protein_coding gene_symbol:HSF1 description:heat shock transcription factor 1 [Source:HGNC Symbol;Acc:HGNC:5224]	FALSE	TRUE	6.23819	2	8	2	High	High	High	High	Phospho [S303(100); S363(100)]	19.62
High	ENSP00000256196.4	pep chromosome:GRCh38:11:14277922:14359183:-1 gene:ENSG00000133818.14 transcript:ENST00000256196.9 gene_biotype:protein_coding transcript_biotype:protein_coding gene_symbol:RRAS2 description:RAS related 2 [Source:HGNC Symbol;Acc:HGNC:17271]	FALSE	TRUE	7.84314	3	7	3	High	High	High	High	Phospho [S186(100)]	17.49
High	ENSP00000362244.2	pep chromosome:GRCh38:1:36156202:36180840:1 gene:ENSG00000116871.15 transcript:ENST00000373151.6 gene_biotype:protein_coding transcript_biotype:protein_coding gene_symbol:MAP7D1 description:MAP7 domain containing 1 [Source:HGNC Symbol;Acc:HGNC:25514]	FALSE	TRUE	6.06421	3	10	3	High	High	High	High	Phospho [S125(100); S410(100); S544(98.6); S548(100); S552(99.8)]	25.43
High	ENSP00000273130.4	pep chromosome:GRCh38:3:32525974:32570858:-1 gene:ENSG00000144635.9 transcript:ENST00000273130.9 gene_biotype:protein_coding transcript_biotype:protein_coding gene_symbol:DYNC1LI1 description:dynein cytoplasmic 1 light intermediate chain 1 [Source:HGNC Symbol;Acc:HGNC:18745]	FALSE	TRUE	12.6195	5	7	5	High	High	High	High	Phospho [S207(100); S405(100); T408(100); S421(100); S516(88.6)]	19.47
High	ENSP00000358001.1	pep chromosome:GRCh38:10:121989163:122254542:1 gene:ENSG00000138162.19 transcript:ENST00000369005.6 gene_biotype:protein_coding transcript_biotype:protein_coding gene_symbol:TACC2 description:transforming acidic coiled-coil containing protein 2 [Source:HGNC Symbol;Acc:HGNC:11523]	FALSE	TRUE	2.88331	6	19	6	High	High	High	High	Phospho [S1946(93.5); S2226(100); S2321(98.7); S2512(94.2); S2569(89.2)]	20.59
High	ENSP00000272139.4	pep chromosome:GRCh38:1:228100731:228103325:-1 gene:ENSG00000143793.13 transcript:ENST00000272139.5 gene_biotype:protein_coding transcript_biotype:protein_coding gene_symbol:C1orf35 description:chromosome 1 open reading frame 35 [Source:HGNC Symbol;Acc:HGNC:19032]	FALSE	TRUE	11.0266	2	8	2	High	High	High	High	Phospho [S177(99.5); T219(94.3)]	15.83
High	ENSP00000261609.7	pep chromosome:GRCh38:15:28111040:28322172:-1 gene:ENSG00000128731.17 transcript:ENST00000261609.12 gene_biotype:protein_coding transcript_biotype:protein_coding gene_symbol:HERC2 description:HECT and RLD domain containing E3 ubiquitin protein ligase 2 [Source:HGNC Symbol;Acc:HGNC:4868]	FALSE	TRUE	0.57923	1	7	1	High	High	High	High	Phospho [S1942(99.2)]	28.61
High	ENSP00000242576.2	pep chromosome:GRCh38:12:109097574:109110992:1 gene:ENSG00000076248.10 transcript:ENST00000242576.6 gene_biotype:protein_coding transcript_biotype:protein_coding gene_symbol:UNG description:uracil DNA glycosylase [Source:HGNC Symbol;Acc:HGNC:12572]	FALSE	TRUE	17.2524	2	4	2	High	High	High	High	Phospho [S23(100); T60(100)]	16.02
High	ENSP00000225698.4	pep chromosome:GRCh38:17:5432777:5439155:-1 gene:ENSG00000108561.8 transcript:ENST00000225698.8 gene_biotype:protein_coding transcript_biotype:protein_coding gene_symbol:C1QBP description:complement C1q binding protein [Source:HGNC Symbol;Acc:HGNC:1243]	FALSE	TRUE	26.2411	4	7	4	High	High	High	High	Phospho [T214(79.6)]	13.3
High	ENSP00000325905.6	pep chromosome:GRCh38:2:38743599:38751361:-1 gene:ENSG00000115875.19 transcript:ENST00000313117.11 gene_biotype:protein_coding transcript_biotype:protein_coding gene_symbol:SRSF7 description:serine and arginine rich splicing factor 7 [Source:HGNC Symbol;Acc:HGNC:10789]	FALSE	TRUE	21.0084	10	29	2	High	High	High	High	Phospho [S171(100); S173(99.9); S181(100); S183(100); S194(100); S196(100); S198(98.5); S215(100); S217(100); S225(100); S227(100); S233(100)]	4.17
High	ENSP00000263620.2	pep chromosome:GRCh38:19:926035:975939:1 gene:ENSG00000116017.11 transcript:ENST00000263620.8 gene_biotype:protein_coding transcript_biotype:protein_coding gene_symbol:ARID3A description:AT-rich interaction domain 3A [Source:HGNC Symbol;Acc:HGNC:3031]	FALSE	TRUE	6.40809	2	5	2	High	High	High	High	Phospho [S77(100); S101(100)]	20.13
High	ENSP00000362900.4	pep chromosome:GRCh38:1:29147743:29181900:-1 gene:ENSG00000116350.17 transcript:ENST00000373795.7 gene_biotype:protein_coding transcript_biotype:protein_coding gene_symbol:SRSF4 description:serine and arginine rich splicing factor 4 [Source:HGNC Symbol;Acc:HGNC:10786]	FALSE	TRUE	11.336	6	10	5	High	High	High	High	Phospho [S261(99.9); S269(91.6); S322(100); S431(100); S1170(100); S1170(100); S1172(100); S1172(100)]	10.01
High	ENSP00000352738.4	pep chromosome:GRCh38:4:75642782:75673969:-1 gene:ENSG00000138757.14 transcript:ENST00000359707.8 gene_biotype:protein_coding transcript_biotype:protein_coding gene_symbol:G3BP2 description:G3BP stress granule assembly factor 2 [Source:HGNC Symbol;Acc:HGNC:30291]	FALSE	TRUE	9.54357	2	11	1	High	High	High	High	Phospho [S149(100)]	21.87
High	ENSP00000386456.3	pep chromosome:GRCh38:2:69457997:69643739:-1 gene:ENSG00000115977.19 transcript:ENST00000409085.9 gene_biotype:protein_coding transcript_biotype:protein_coding gene_symbol:AAK1 description:AP2 associated kinase 1 [Source:HGNC Symbol;Acc:HGNC:19679]	FALSE	TRUE	5.41103	4	11	3	High	High	High	High	Phospho [T620(100); S624(99.6); T640(100)]	14.9
High	ENSP00000338020.4	pep chromosome:GRCh38:3:184314495:184335357:1 gene:ENSG00000114867.20 transcript:ENST00000352767.7 gene_biotype:protein_coding transcript_biotype:protein_coding gene_symbol:EIF4G1 description:eukaryotic translation initiation factor 4 gamma 1 [Source:HGNC Symbol;Acc:HGNC:3296]	FALSE	TRUE	3.30012	7	14	7	High	High	High	High	Phospho [S711(100); S1151(93); S1154(99.4); S1194(100); S1201(100); S1238(100); S1603(100)]	20.16
High	ENSP00000495401.1	pep chromosome:GRCh38:CHR_HG2419_PATCH:144262045:144291438:-1 gene:ENSG00000285301.2 transcript:ENST00000642409.2 gene_biotype:protein_coding transcript_biotype:protein_coding gene_symbol:BOP1 description:BOP1 ribosomal biogenesis factor [Source:HGNC Symbol;Acc:HGNC:15519]	FALSE	TRUE	2.14477	1	8	1	High	High	High	High	Phospho [S126(100); S127(100)]	39.38
High	ENSP00000314615.3	pep chromosome:GRCh38:20:63272865:63289344:1 gene:ENSG00000101199.13 transcript:ENST00000353546.7 gene_biotype:protein_coding transcript_biotype:protein_coding gene_symbol:ARFGAP1 description:ADP ribosylation factor GTPase activating protein 1 [Source:HGNC Symbol;Acc:HGNC:15852]	FALSE	TRUE	14.4928	4	9	4	High	High	High	High	Phospho [T135(100); T189(100); S351(75.7); S386(100)]	18.14
High	ENSP00000354671.2	pep chromosome:GRCh38:1:45803612:46036122:1 gene:ENSG00000086015.21 transcript:ENST00000361297.7 gene_biotype:protein_coding transcript_biotype:protein_coding gene_symbol:MAST2 description:microtubule associated serine/threonine kinase 2 [Source:HGNC Symbol;Acc:HGNC:19035]	FALSE	TRUE	3.8376	6	10	5	High	High	High	High	Phospho [S66(100); S281(99.2); S900(100); S996(99.8); S1381(100); S1399(100)]	18.21
High	ENSP00000362456.3	pep chromosome:GRCh38:X:76173062:76178314:1 gene:ENSG00000102390.11 transcript:ENST00000373358.8 gene_biotype:protein_coding transcript_biotype:protein_coding gene_symbol:PBDC1 description:polysaccharide biosynthesis domain containing 1 [Source:HGNC Symbol;Acc:HGNC:28790]	FALSE	TRUE	10.7296	3	8	3	High	High	High	High	Phospho [S181(100); S197(100)]	15.06
High	ENSP00000365837.3	pep chromosome:GRCh38:12:131929276:131945896:1 gene:ENSG00000177192.14 transcript:ENST00000376649.8 gene_biotype:protein_coding transcript_biotype:protein_coding gene_symbol:PUS1 description:pseudouridine synthase 1 [Source:HGNC Symbol;Acc:HGNC:15508]	FALSE	TRUE	3.51288	1	13	1	High	High	High	High	Phospho [S420(100); T426(100)]	43.98
High	ENSP00000161863.4	pep chromosome:GRCh38:5:113513694:113595284:1 gene:ENSG00000047188.16 transcript:ENST00000161863.9 gene_biotype:protein_coding transcript_biotype:protein_coding gene_symbol:YTHDC2 description:YTH domain containing 2 [Source:HGNC Symbol;Acc:HGNC:24721]	FALSE	TRUE	1.11888	1	7	1	High	High	High	High	Phospho [S1090(94.9)]	16.41
High	ENSP00000440945.1	pep chromosome:GRCh38:11:47177540:47185881:-1 gene:ENSG00000165912.16 transcript:ENST00000539589.5 gene_biotype:protein_coding transcript_biotype:protein_coding gene_symbol:PACSIN3 description:protein kinase C and casein kinase substrate in neurons 3 [Source:HGNC Symbol;Acc:HGNC:8572]	FALSE	TRUE	10.3774	2	6	2	High	High	High	High	Phospho [S276(100); S354(99.9)]	27.77
High	ENSP00000367629.4	pep chromosome:GRCh38:1:3454665:3481113:1 gene:ENSG00000130762.15 transcript:ENST00000378378.9 gene_biotype:protein_coding transcript_biotype:protein_coding gene_symbol:ARHGEF16 description:Rho guanine nucleotide exchange factor 16 [Source:HGNC Symbol;Acc:HGNC:15515]	FALSE	TRUE	3.38505	1	5	1	High	High	High	High	Phospho [S230(93.6)]	19.92
High	ENSP00000417559.1	pep chromosome:GRCh38:3:161221308:161253532:1 gene:ENSG00000169251.12 transcript:ENST00000472947.5 gene_biotype:protein_coding transcript_biotype:protein_coding gene_symbol:NMD3 description:NMD3 ribosome export adaptor [Source:HGNC Symbol;Acc:HGNC:24250]	FALSE	TRUE	5.67108	2	6	2	High	High	High	High	Phospho [T470(99.8)]	19.1
High	ENSP00000454545.1	pep chromosome:GRCh38:3:51391285:51397908:1 gene:ENSG00000259956.2 transcript:ENST00000563281.2 gene_biotype:protein_coding transcript_biotype:protein_coding gene_symbol:RBM15B description:RNA binding motif protein 15B [Source:HGNC Symbol;Acc:HGNC:24303]	FALSE	TRUE	7.97753	7	7	7	High	High	High	High	Phospho [S109(100); S267(100); T532(100); S552(100); S598(100); S600(99.5); S609(99.9); T631(100)]	15.13
High	ENSP00000469689.2	pep chromosome:GRCh38:11:70469435:71224762:-1 gene:ENSG00000162105.19 transcript:ENST00000601538.5 gene_biotype:protein_coding transcript_biotype:protein_coding gene_symbol:SHANK2 description:SH3 and multiple ankyrin repeat domains 2 [Source:HGNC Symbol;Acc:HGNC:14295]	FALSE	TRUE	2.32558	3	7	3	High	High	High	High	Phospho [S444(93.2); S1022(100); S1709(100)]	14.4
High	ENSP00000268802.5	pep chromosome:GRCh38:16:69741871:69754926:-1 gene:ENSG00000141101.13 transcript:ENST00000268802.10 gene_biotype:protein_coding transcript_biotype:protein_coding gene_symbol:NOB1 description:NIN1 (RPN12) binding protein 1 homolog [Source:HGNC Symbol;Acc:HGNC:29540]	FALSE	TRUE	8.98058	2	5	2	High	High	High	High	Phospho [S184(100); S201(100)]	19.7
High	ENSP00000482026.1	pep chromosome:GRCh38:1:71065719:71081289:-1 gene:ENSG00000132485.14 transcript:ENST00000611683.1 gene_biotype:protein_coding transcript_biotype:protein_coding gene_symbol:ZRANB2 description:zinc finger RANBP2-type containing 2 [Source:HGNC Symbol;Acc:HGNC:13058]	FALSE	TRUE	20.3125	6	12	6	High	High	High	High	Phospho [S153(100); S188(100); S294(99.6); S295(99.6); T303(100); S305(100); S307(100)]	30.34
High	ENSP00000247026.5	pep chromosome:GRCh38:17:30116816:30186475:1 gene:ENSG00000126653.18 transcript:ENST00000247026.10 gene_biotype:protein_coding transcript_biotype:protein_coding gene_symbol:NSRP1 description:nuclear speckle splicing regulatory protein 1 [Source:HGNC Symbol;Acc:HGNC:25305]	FALSE	TRUE	8.60215	5	9	5	High	High	High	High	Phospho [S248(100); T275(100); S457(94.8)]	17.82
High	ENSP00000243286.3	pep chromosome:GRCh38:X:103607906:103609926:1 gene:ENSG00000196507.11 transcript:ENST00000243286.7 gene_biotype:protein_coding transcript_biotype:protein_coding gene_symbol:TCEAL3 description:transcription elongation factor A like 3 [Source:HGNC Symbol;Acc:HGNC:28247]	FALSE	TRUE	18.5	3	6	3	High	High	High	High	Phospho [S65(100); S121(100)]	21.45
High	ENSP00000253024.4	pep chromosome:GRCh38:19:58544064:58550715:1 gene:ENSG00000130726.12 transcript:ENST00000253024.10 gene_biotype:protein_coding transcript_biotype:protein_coding gene_symbol:TRIM28 description:tripartite motif containing 28 [Source:HGNC Symbol;Acc:HGNC:16384]	FALSE	TRUE	10.5389	4	13	4	High	High	High	High	Phospho [S473(91.3)]	22.66
High	ENSP00000500728.1	pep chromosome:GRCh38:12:122471599:122501073:-1 gene:ENSG00000033030.14 transcript:ENST00000672018.1 gene_biotype:protein_coding transcript_biotype:protein_coding gene_symbol:ZCCHC8 description:zinc finger CCHC-type containing 8 [Source:HGNC Symbol;Acc:HGNC:25265]	FALSE	TRUE	8.62801	5	8	5	High	High	High	High	Phospho [S427(100); T479(100); T492(100); T503(91.9); T648(87.3); S658(100)]	16.94
High	ENSP00000224140.5	pep chromosome:GRCh38:9:132261356:132354986:-1 gene:ENSG00000107290.14 transcript:ENST00000224140.6 gene_biotype:protein_coding transcript_biotype:protein_coding gene_symbol:SETX description:senataxin [Source:HGNC Symbol;Acc:HGNC:445]	FALSE	TRUE	0.933881	2	8	2	High	High	High	High	Phospho [S947(100); S1019(99.8)]	30.59
High	ENSP00000376097.2	pep chromosome:GRCh38:19:29942239:30016612:1 gene:ENSG00000105176.18 transcript:ENST00000392271.6 gene_biotype:protein_coding transcript_biotype:protein_coding gene_symbol:URI1 description:URI1 prefoldin like chaperone [Source:HGNC Symbol;Acc:HGNC:13236]	FALSE	TRUE	3.73832	2	5	2	High	High	High	High	Phospho [S421(93.2); S424(99.5)]	15.53
High	ENSP00000394316.2	pep chromosome:GRCh38:2:200812356:200822243:1 gene:ENSG00000082153.18 transcript:ENST00000452790.6 gene_biotype:protein_coding transcript_biotype:protein_coding gene_symbol:BZW1 description:basic leucine zipper and W2 domains 1 [Source:HGNC Symbol;Acc:HGNC:18380]	FALSE	TRUE	3.10421	1	11	1	High	High	High	High	Phospho [S443(99.8)]	43.24
High	ENSP00000418753.1	pep chromosome:GRCh38:X:132023302:132074461:1 gene:ENSG00000134602.16 transcript:ENST00000481105.5 gene_biotype:protein_coding transcript_biotype:protein_coding gene_symbol:STK26 description:serine/threonine kinase 26 [Source:HGNC Symbol;Acc:HGNC:18174]	FALSE	TRUE	5.25114	2	5	2	High	High	High	High	Phospho [S331(92.7)]	14.36
High	ENSP00000375851.3	pep chromosome:GRCh38:2:238320441:238400822:1 gene:ENSG00000204104.12 transcript:ENST00000391993.7 gene_biotype:protein_coding transcript_biotype:protein_coding gene_symbol:TRAF3IP1 description:TRAF3 interacting protein 1 [Source:HGNC Symbol;Acc:HGNC:17861]	FALSE	TRUE	5.44	2	6	2	High	High	High	High	Phospho [S357(99.7); S359(94.9); S410(100)]	16.68
High	ENSP00000349856.4	pep chromosome:GRCh38:9:131430090:131500171:1 gene:ENSG00000130723.20 transcript:ENST00000357304.8 gene_biotype:protein_coding transcript_biotype:protein_coding gene_symbol:PRRC2B description:proline rich coiled-coil 2B [Source:HGNC Symbol;Acc:HGNC:28121]	FALSE	TRUE	2.91611	5	8	5	High	High	High	High	Phospho [S388(100); S480(100); S556(100); S613(100); S1132(93.1); S1136(99.4)]	14.78
High	ENSP00000296215.5	pep chromosome:GRCh38:1:37534449:37554293:-1 gene:ENSG00000163877.11 transcript:ENST00000296215.8 gene_biotype:protein_coding transcript_biotype:protein_coding gene_symbol:SNIP1 description:Smad nuclear interacting protein 1 [Source:HGNC Symbol;Acc:HGNC:30587]	FALSE	TRUE	11.8687	4	8	4	High	High	High	High	Phospho [S35(100); S52(98.6); S54(99.8)]	13.55
High	ENSP00000346890.7	pep chromosome:GRCh38:1:51789191:51878805:-1 gene:ENSG00000078618.21 transcript:ENST00000354831.11 gene_biotype:protein_coding transcript_biotype:protein_coding gene_symbol:NRDC description:nardilysin convertase [Source:HGNC Symbol;Acc:HGNC:7995]	FALSE	TRUE	2.05086	3	5	3	High	High	High	High	Phospho [S86(100); S94(99.7)]	12.21
High	ENSP00000418563.1	pep chromosome:GRCh38:3:143001570:143060725:1 gene:ENSG00000163714.18 transcript:ENST00000473835.7 gene_biotype:protein_coding transcript_biotype:protein_coding gene_symbol:U2SURP description:U2 snRNP associated SURP domain containing [Source:HGNC Symbol;Acc:HGNC:30855]	FALSE	TRUE	5.345	6	8	6	High	High	High	High	Phospho [S49(100); S485(100); T919(100); S930(95.4); S934(92.2); S974(100); S1012(100); S1014(100); S1016(100)]	7.99
High	ENSP00000431391.1	pep chromosome:GRCh38:11:43311996:43344529:1 gene:ENSG00000166181.13 transcript:ENST00000531273.6 gene_biotype:protein_coding transcript_biotype:protein_coding gene_symbol:API5 description:apoptosis inhibitor 5 [Source:HGNC Symbol;Acc:HGNC:594]	FALSE	TRUE	2.48092	2	15	2	High	High	High	High	Phospho [S464(99.6)]	14.63
High	ENSP00000265077.3	pep chromosome:GRCh38:5:83471744:83582302:1 gene:ENSG00000038427.16 transcript:ENST00000265077.8 gene_biotype:protein_coding transcript_biotype:protein_coding gene_symbol:VCAN description:versican [Source:HGNC Symbol;Acc:HGNC:2464]	FALSE	TRUE	0.500589	1	10	1	High	High	High	High	Phospho [S2116(100)]	32.35
High	ENSP00000255120.5	pep chromosome:GRCh38:1:45584041:45618893:1 gene:ENSG00000132780.17 transcript:ENST00000350030.8 gene_biotype:protein_coding transcript_biotype:protein_coding gene_symbol:NASP description:nuclear autoantigenic sperm protein [Source:HGNC Symbol;Acc:HGNC:7644]	FALSE	TRUE	6.72589	6	10	6	High	High	High	High	Phospho [S421(99.7); T477(81.3); S726(100)]	16.04
High	ENSP00000387784.1	pep chromosome:GRCh38:2:38981396:39121051:-1 gene:ENSG00000115904.12 transcript:ENST00000426016.5 gene_biotype:protein_coding transcript_biotype:protein_coding gene_symbol:SOS1 description:SOS Ras/Rac guanine nucleotide exchange factor 1 [Source:HGNC Symbol;Acc:HGNC:11187]	FALSE	TRUE	3.07577	2	5	2	High	High	High	High	Phospho [S1082(100); S1275(100)]	16.96
High	ENSP00000368884.3	pep chromosome:GRCh38:X:20149911:20266909:-1 gene:ENSG00000177189.14 transcript:ENST00000379565.9 gene_biotype:protein_coding transcript_biotype:protein_coding gene_symbol:RPS6KA3 description:ribosomal protein S6 kinase A3 [Source:HGNC Symbol;Acc:HGNC:10432]	FALSE	TRUE	6.62162	4	9	4	High	High	High	High	Phospho [T231(93.6); S369(100); S715(100)]	19.05
High	ENSP00000373772.3	pep chromosome:GRCh38:9:101533853:101563344:1 gene:ENSG00000155827.12 transcript:ENST00000389120.8 gene_biotype:protein_coding transcript_biotype:protein_coding gene_symbol:RNF20 description:ring finger protein 20 [Source:HGNC Symbol;Acc:HGNC:10062]	FALSE	TRUE	1.74359	1	10	1	High	High	High	High	Phospho [S136(100); S138(100)]	31.27
High	ENSP00000462729.1	pep chromosome:GRCh38:1:149937812:150010726:-1 gene:ENSG00000264522.6 transcript:ENST00000581312.6 gene_biotype:protein_coding transcript_biotype:protein_coding gene_symbol:OTUD7B description:OTU deubiquitinase 7B [Source:HGNC Symbol;Acc:HGNC:16683]	FALSE	TRUE	2.84698	1	6	1	High	High	High	High	Phospho [S467(100)]	22.47
High	ENSP00000457411.1	pep chromosome:GRCh38:16:84700004:84779194:1 gene:ENSG00000103194.15 transcript:ENST00000570191.5 gene_biotype:protein_coding transcript_biotype:protein_coding gene_symbol:USP10 description:ubiquitin specific peptidase 10 [Source:HGNC Symbol;Acc:HGNC:12608]	FALSE	TRUE	8.60349	3	9	3	High	High	High	High	Phospho [S215(97.5); S374(99.1); S580(100)]	25.15
High	ENSP00000246489.7	pep chromosome:GRCh38:14:103629241:103693743:1 gene:ENSG00000126214.21 transcript:ENST00000246489.11 gene_biotype:protein_coding transcript_biotype:protein_coding gene_symbol:KLC1 description:kinesin light chain 1 [Source:HGNC Symbol;Acc:HGNC:6387]	FALSE	TRUE	6.27943	4	8	4	High	High	High	High	Phospho [S460(93.6); S563(93.5); S631(86.9)]	13.55
High	ENSP00000327539.6	pep chromosome:GRCh38:5:179614181:179623168:-1 gene:ENSG00000169045.17 transcript:ENST00000329433.10 gene_biotype:protein_coding transcript_biotype:protein_coding gene_symbol:HNRNPH1 description:heterogeneous nuclear ribonucleoprotein H1 [Source:HGNC Symbol;Acc:HGNC:5041]	FALSE	TRUE	6.99153	2	8	1	High	High	High	High	Phospho [S104(100); S310(100)]	31.53
High	ENSP00000358283.4	pep chromosome:GRCh38:6:96521806:96555276:1 gene:ENSG00000014123.10 transcript:ENST00000369278.5 gene_biotype:protein_coding transcript_biotype:protein_coding gene_symbol:UFL1 description:UFM1 specific ligase 1 [Source:HGNC Symbol;Acc:HGNC:23039]	FALSE	TRUE	2.267	3	7	3	High	High	High	High	Phospho [S458(100)]	18.6
High	ENSP00000374574.2	pep chromosome:GRCh38:17:63774170:63819317:1 gene:ENSG00000198231.13 transcript:ENST00000389924.7 gene_biotype:protein_coding transcript_biotype:protein_coding gene_symbol:DDX42 description:DEAD-box helicase 42 [Source:HGNC Symbol;Acc:HGNC:18676]	FALSE	TRUE	10.2345	3	6	3	High	High	High	High	Phospho [S96(88.8); S185(86.9)]	18.43
High	ENSP00000351646.5	pep chromosome:GRCh38:11:64185272:64204543:1 gene:ENSG00000168439.16 transcript:ENST00000358794.9 gene_biotype:protein_coding transcript_biotype:protein_coding gene_symbol:STIP1 description:stress induced phosphoprotein 1 [Source:HGNC Symbol;Acc:HGNC:11387]	FALSE	TRUE	6.10169	4	10	4	High	High	High	High	Phospho [S528(100)]	26.71
High	ENSP00000433664.1	pep chromosome:GRCh38:11:10797050:10807973:-1 gene:ENSG00000110321.17 transcript:ENST00000526148.5 gene_biotype:protein_coding transcript_biotype:protein_coding gene_symbol:EIF4G2 description:eukaryotic translation initiation factor 4 gamma 2 [Source:HGNC Symbol;Acc:HGNC:3297]	FALSE	TRUE	3.63837	3	17	3	High	High	High	High	Phospho [S17(81.1); S395(100); T508(94.6)]	30.16
High	ENSP00000275493.2	pep chromosome:GRCh38:7:55019017:55211628:1 gene:ENSG00000146648.18 transcript:ENST00000275493.7 gene_biotype:protein_coding transcript_biotype:protein_coding gene_symbol:EGFR description:epidermal growth factor receptor [Source:HGNC Symbol;Acc:HGNC:3236]	FALSE	TRUE	5.78512	3	12	3	High	High	High	High	Phospho [T693(100); S1166(100)]	23.07
High	ENSP00000317272.6	pep chromosome:GRCh38:7:116672196:116798377:1 gene:ENSG00000105976.15 transcript:ENST00000318493.11 gene_biotype:protein_coding transcript_biotype:protein_coding gene_symbol:MET description:MET proto-oncogene, receptor tyrosine kinase [Source:HGNC Symbol;Acc:HGNC:7029]	FALSE	TRUE	1.20739	1	10	1	High	High	High	High	Phospho [T1010(94.2)]	26.78
High	ENSP00000345739.3	pep chromosome:GRCh38:19:10133346:10195135:-1 gene:ENSG00000130816.16 transcript:ENST00000340748.8 gene_biotype:protein_coding transcript_biotype:protein_coding gene_symbol:DNMT1 description:DNA methyltransferase 1 [Source:HGNC Symbol;Acc:HGNC:2976]	FALSE	TRUE	3.21782	3	6	3	High	High	High	High	Phospho [S127(95); S143(89.8); S714(100)]	16.65
High	ENSP00000489124.1	pep chromosome:GRCh38:1:62454726:62688386:-1 gene:ENSG00000116641.18 transcript:ENST00000635253.2 gene_biotype:protein_coding transcript_biotype:protein_coding gene_symbol:DOCK7 description:dedicator of cytokinesis 7 [Source:HGNC Symbol;Acc:HGNC:19190]	FALSE	TRUE	1.40187	2	7	2	High	High	High	High	Phospho [S180(100); S182(100); S900(98.5)]	17.55
High	ENSP00000428137.1	pep chromosome:GRCh38:8:141210529:141254229:-1 gene:ENSG00000022567.9 transcript:ENST00000517878.5 gene_biotype:protein_coding transcript_biotype:protein_coding gene_symbol:SLC45A4 description:solute carrier family 45 member 4 [Source:HGNC Symbol;Acc:HGNC:29196]	FALSE	TRUE	8.91089	3	3	3	High	High	High	High	Phospho [S289(100); S485(100)]	15.4
High	ENSP00000471865.1	pep chromosome:GRCh38:19:4047742:4065732:-1 gene:ENSG00000178951.9 transcript:ENST00000601588.1 gene_biotype:protein_coding transcript_biotype:protein_coding gene_symbol:ZBTB7A description:zinc finger and BTB domain containing 7A [Source:HGNC Symbol;Acc:HGNC:18078]	FALSE	TRUE	10.6164	4	8	4	High	High	High	High	Phospho [S337(100); S526(89.2); S549(100)]	22.2
High	ENSP00000380054.2	pep chromosome:GRCh38:3:15427598:15442613:1 gene:ENSG00000144597.14 transcript:ENST00000396842.7 gene_biotype:protein_coding transcript_biotype:protein_coding gene_symbol:EAF1 description:ELL associated factor 1 [Source:HGNC Symbol;Acc:HGNC:20907]	FALSE	TRUE	11.9403	2	9	2	High	High	High	High	Phospho [S158(92.8); S266(99.7)]	26.16
High	ENSP00000373805.6	pep chromosome:GRCh38:12:111452223:111599122:-1 gene:ENSG00000204842.17 transcript:ENST00000389153.10 gene_biotype:protein_coding transcript_biotype:protein_coding gene_symbol:ATXN2 description:ataxin 2 [Source:HGNC Symbol;Acc:HGNC:10555]	FALSE	TRUE	6.07176	5	8	1	High	High	High	High	Phospho [S532(100); S546(90.5); S558(100)]	15.34
High	ENSP00000415464.3	pep chromosome:GRCh38:12:50400857:50477517:1 gene:ENSG00000161813.22 transcript:ENST00000429001.7 gene_biotype:protein_coding transcript_biotype:protein_coding gene_symbol:LARP4 description:La ribonucleoprotein domain family member 4 [Source:HGNC Symbol;Acc:HGNC:24320]	FALSE	TRUE	8.08219	3	13	3	High	High	High	High	Phospho [S589(100); S653(81.7); S728(100)]	8.23
High	ENSP00000335320.3	pep chromosome:GRCh38:11:118893875:118910904:-1 gene:ENSG00000186174.12 transcript:ENST00000334801.7 gene_biotype:protein_coding transcript_biotype:protein_coding gene_symbol:BCL9L description:BCL9 like [Source:HGNC Symbol;Acc:HGNC:23688]	FALSE	TRUE	5.47031	6	9	6	High	High	High	High	Phospho [S21(100); S25(100); S121(99.7); S750(100); S813(100); S997(99.9); S1017(100)]	19.42
High	ENSP00000357053.1	pep chromosome:GRCh38:1:160215715:160262501:-1 gene:ENSG00000132716.18 transcript:ENST00000368074.5 gene_biotype:protein_coding transcript_biotype:protein_coding gene_symbol:DCAF8 description:DDB1 and CUL4 associated factor 8 [Source:HGNC Symbol;Acc:HGNC:24891]	FALSE	TRUE	5.52764	3	10	3	High	High	High	High	Phospho [S99(100)]	23.51
High	ENSP00000253363.6	pep chromosome:GRCh38:20:35701347:35742260:-1 gene:ENSG00000131051.24 transcript:ENST00000253363.11 gene_biotype:protein_coding transcript_biotype:protein_coding gene_symbol:RBM39 description:RNA binding motif protein 39 [Source:HGNC Symbol;Acc:HGNC:15923]	FALSE	TRUE	8.11321	3	10	3	High	High	High	High	Phospho [S136(100); T330(89.5)]	15.26
High	ENSP00000320821.5	pep chromosome:GRCh38:17:4997950:5028401:1 gene:ENSG00000129250.12 transcript:ENST00000320785.10 gene_biotype:protein_coding transcript_biotype:protein_coding gene_symbol:KIF1C description:kinesin family member 1C [Source:HGNC Symbol;Acc:HGNC:6317]	FALSE	TRUE	3.53581	3	8	3	High	High	High	High	Phospho [S674(99.9); S676(100); S915(99.8); T1083(100)]	17.11
High	ENSP00000402264.2	pep chromosome:GRCh38:2:38743599:38751494:-1 gene:ENSG00000115875.19 transcript:ENST00000446327.6 gene_biotype:protein_coding transcript_biotype:protein_coding gene_symbol:SRSF7 description:serine and arginine rich splicing factor 7 [Source:HGNC Symbol;Acc:HGNC:10789]	FALSE	TRUE	19.469	9	25	1	High	High	High	High	Phospho [S171(100); S173(99.9); S181(100); S183(100); S194(100); S196(100); S198(98.5); S213(100); S215(100); S221(100)]	5.8
High	ENSP00000252674.6	pep chromosome:GRCh38:19:6210381:6279975:-1 gene:ENSG00000130382.9 transcript:ENST00000252674.9 gene_biotype:protein_coding transcript_biotype:protein_coding gene_symbol:MLLT1 description:MLLT1 super elongation complex subunit [Source:HGNC Symbol;Acc:HGNC:7134]	FALSE	TRUE	6.44007	3	13	3	High	High	High	High	Phospho [S209(99.8); S444(82.6); S475(99.4)]	16.57
High	ENSP00000498679.1	pep chromosome:GRCh38:17:2689388:2711764:-1 gene:ENSG00000132361.17 transcript:ENST00000651024.1 gene_biotype:protein_coding transcript_biotype:protein_coding gene_symbol:CLUH description:clustered mitochondria homolog [Source:HGNC Symbol;Acc:HGNC:29094]	FALSE	TRUE	2.15134	2	4	1	High	High	High	High	Phospho [S702(100)]	16.31
High	ENSP00000275034.3	pep chromosome:GRCh38:6:78934419:79078254:-1 gene:ENSG00000146247.14 transcript:ENST00000275034.5 gene_biotype:protein_coding transcript_biotype:protein_coding gene_symbol:PHIP description:pleckstrin homology domain interacting protein [Source:HGNC Symbol;Acc:HGNC:15673]	FALSE	TRUE	3.34981	5	7	5	High	High	High	High	Phospho [S9(100); S879(100); S880(100); S881(100); S911(100); S1281(100); S1283(100); S1783(100)]	17.25
High	ENSP00000405111.2	pep chromosome:GRCh38:2:38797729:38875934:-1 gene:ENSG00000163214.21 transcript:ENST00000457308.6 gene_biotype:protein_coding transcript_biotype:protein_coding gene_symbol:DHX57 description:DExH-box helicase 57 [Source:HGNC Symbol;Acc:HGNC:20086]	FALSE	TRUE	2.23665	2	4	2	High	High	High	High	Phospho [S127(100); S132(100)]	15.28
High	ENSP00000396441.2	pep chromosome:GRCh38:1:156595213:156601470:-1 gene:ENSG00000160818.16 transcript:ENST00000438976.6 gene_biotype:protein_coding transcript_biotype:protein_coding gene_symbol:GPATCH4 description:G-patch domain containing 4 [Source:HGNC Symbol;Acc:HGNC:25982]	FALSE	TRUE	4.53333	2	6	2	High	High	High	High	Phospho [S135(99.8); S144(100)]	14
High	ENSP00000362947.1	pep chromosome:GRCh38:X:71283633:71301168:1 gene:ENSG00000147140.16 transcript:ENST00000373841.5 gene_biotype:protein_coding transcript_biotype:protein_coding gene_symbol:NONO description:non-POU domain containing octamer binding [Source:HGNC Symbol;Acc:HGNC:7871]	FALSE	TRUE	12.3142	2	4	2	High	High	High	High	Phospho [T450(100)]	14.27
High	ENSP00000446184.2	pep chromosome:GRCh38:10:97356701:97426074:-1 gene:ENSG00000052749.13 transcript:ENST00000536831.5 gene_biotype:protein_coding transcript_biotype:protein_coding gene_symbol:RRP12 description:ribosomal RNA processing 12 homolog [Source:HGNC Symbol;Acc:HGNC:29100]	FALSE	TRUE	1.69622	1	7	1	High	High	High	High	Phospho [S1080(100)]	42.85
High	ENSP00000414624.2	pep chromosome:GRCh38:17:76309478:76353916:-1 gene:ENSG00000161542.17 transcript:ENST00000446526.8 gene_biotype:protein_coding transcript_biotype:protein_coding gene_symbol:PRPSAP1 description:phosphoribosyl pyrophosphate synthetase associated protein 1 [Source:HGNC Symbol;Acc:HGNC:9466]	FALSE	TRUE	7.27273	1	6	1	High	High	High	High	Phospho [S244(100)]	18.98
High	ENSP00000361892.3	pep chromosome:GRCh38:20:44966512:45080021:1 gene:ENSG00000101109.12 transcript:ENST00000372806.8 gene_biotype:protein_coding transcript_biotype:protein_coding gene_symbol:STK4 description:serine/threonine kinase 4 [Source:HGNC Symbol;Acc:HGNC:11408]	FALSE	TRUE	4.51745	1	5	1	High	High	High	High	Phospho [S320(100)]	28.73
High	ENSP00000377048.1	pep chromosome:GRCh38:6:63646526:63714509:1 gene:ENSG00000118482.11 transcript:ENST00000393387.5 gene_biotype:protein_coding transcript_biotype:protein_coding gene_symbol:PHF3 description:PHD finger protein 3 [Source:HGNC Symbol;Acc:HGNC:8921]	FALSE	TRUE	2.10888	3	5	3	High	High	High	High	Phospho [S283(100); S1133(100); S1614(99.5)]	11.26
High	ENSP00000254605.6	pep chromosome:GRCh38:11:6595072:6603616:-1 gene:ENSG00000132275.11 transcript:ENST00000254605.11 gene_biotype:protein_coding transcript_biotype:protein_coding gene_symbol:RRP8 description:ribosomal RNA processing 8 [Source:HGNC Symbol;Acc:HGNC:29030]	FALSE	TRUE	5.04386	3	10	3	High	High	High	High	Phospho [S104(100); S106(100); S223(100)]	26.73
High	ENSP00000310723.2	pep chromosome:GRCh38:12:48829756:48852163:-1 gene:ENSG00000174243.10 transcript:ENST00000308025.8 gene_biotype:protein_coding transcript_biotype:protein_coding gene_symbol:DDX23 description:DEAD-box helicase 23 [Source:HGNC Symbol;Acc:HGNC:17347]	FALSE	TRUE	3.29268	5	17	5	High	High	High	High	Phospho [S14(95.4); T25(95); S107(99.5); S109(100)]	20.65
High	ENSP00000384160.3	pep chromosome:GRCh38:7:155644661:155781480:1 gene:ENSG00000184863.11 transcript:ENST00000401878.8 gene_biotype:protein_coding transcript_biotype:protein_coding gene_symbol:RBM33 description:RNA binding motif protein 33 [Source:HGNC Symbol;Acc:HGNC:27223]	FALSE	TRUE	2.47863	2	6	2	High	High	High	High	Phospho [S205(100); S765(100)]	18.17
High	ENSP00000265069.8	pep chromosome:GRCh38:5:32354350:32444740:-1 gene:ENSG00000056097.16 transcript:ENST00000265069.13 gene_biotype:protein_coding transcript_biotype:protein_coding gene_symbol:ZFR description:zinc finger RNA binding protein [Source:HGNC Symbol;Acc:HGNC:17277]	FALSE	TRUE	1.39665	3	6	3	High	High	High	High	Phospho [S1054(100)]	14.42
High	ENSP00000400912.1	pep chromosome:GRCh38:7:100875390:100881722:1 gene:ENSG00000087087.20 transcript:ENST00000431645.1 gene_biotype:protein_coding transcript_biotype:protein_coding gene_symbol:SRRT description:serrate, RNA effector molecule [Source:HGNC Symbol;Acc:HGNC:24101]	FALSE	TRUE	30.3571	6	17	1	High	High	High	High	Phospho [S11(100); S33(100); S74(100); S81(100)]	18.11
High	ENSP00000483730.1	pep chromosome:GRCh38:19:46918676:47004307:1 gene:ENSG00000160007.19 transcript:ENST00000614079.1 gene_biotype:protein_coding transcript_biotype:protein_coding gene_symbol:ARHGAP35 description:Rho GTPase activating protein 35 [Source:HGNC Symbol;Acc:HGNC:4591]	FALSE	TRUE	2.80187	2	4	2	High	High	High	High	Phospho [S970(100); S1179(100)]	17.85
High	ENSP00000264183.3	pep chromosome:GRCh38:1:235166902:235328179:-1 gene:ENSG00000054267.22 transcript:ENST00000264183.9 gene_biotype:protein_coding transcript_biotype:protein_coding gene_symbol:ARID4B description:AT-rich interaction domain 4B [Source:HGNC Symbol;Acc:HGNC:15550]	FALSE	TRUE	6.47866	6	10	6	High	High	High	High	Phospho [S790(100); T793(99.1); S838(87.8); S858(84.5); S1190(100)]	12.37
High	ENSP00000498164.1	pep chromosome:GRCh38:3:184135377:184144966:1 gene:ENSG00000145191.15 transcript:ENST00000647909.1 gene_biotype:protein_coding transcript_biotype:protein_coding gene_symbol:EIF2B5 description:eukaryotic translation initiation factor 2B subunit epsilon [Source:HGNC Symbol;Acc:HGNC:3261]	FALSE	TRUE	5.89849	3	6	3	High	High	High	High	Phospho [S535(84); S543(83.6); S552(100); S725(96.5)]	19.15
High	ENSP00000499773.1	pep chromosome:GRCh38:17:7484366:7514616:1 gene:ENSG00000181222.16 transcript:ENST00000617998.5 gene_biotype:protein_coding transcript_biotype:protein_coding gene_symbol:POLR2A description:RNA polymerase II subunit A [Source:HGNC Symbol;Acc:HGNC:9187]	FALSE	TRUE	4.97462	5	10	5	High	High	High	High	Phospho [S1882(99.9); T1905(87.3); S3842(93.6); S3842(93.6); T7573(85.6); T7573(85.6)]	18.76
High	ENSP00000366604.1	pep chromosome:GRCh38:11:64764606:64778469:-1 gene:ENSG00000168066.20 transcript:ENST00000377387.5 gene_biotype:protein_coding transcript_biotype:protein_coding gene_symbol:SF1 description:splicing factor 1 [Source:HGNC Symbol;Acc:HGNC:12950]	FALSE	TRUE	3.8633	2	11	2	High	High	High	High	Phospho [S112(100); S205(100); S207(100)]	32.49
High	ENSP00000487984.1	pep chromosome:GRCh38:CHR_HSCHR11_1_CTG7:2943973:2991260:-1 gene:ENSG00000273562.4 transcript:ENST00000632791.1 gene_biotype:protein_coding transcript_biotype:protein_coding gene_symbol:NAP1L4 description:nucleosome assembly protein 1 like 4 [Source:HGNC Symbol;Acc:HGNC:7640]	FALSE	TRUE	11.1399	3	6	3	High	High	High	High	Phospho [T51(97.8); S125(100)]	27.63
High	ENSP00000376071.2	pep chromosome:GRCh38:2:202634969:202769757:1 gene:ENSG00000138439.12 transcript:ENST00000392238.3 gene_biotype:protein_coding transcript_biotype:protein_coding gene_symbol:FAM117B description:family with sequence similarity 117 member B [Source:HGNC Symbol;Acc:HGNC:14440]	FALSE	TRUE	6.11205	3	8	3	High	High	High	High	Phospho [T108(88.6); S180(100); S276(84.9)]	14.56
High	ENSP00000351416.4	pep chromosome:GRCh38:4:73073376:73258798:-1 gene:ENSG00000132466.19 transcript:ENST00000358602.9 gene_biotype:protein_coding transcript_biotype:protein_coding gene_symbol:ANKRD17 description:ankyrin repeat domain 17 [Source:HGNC Symbol;Acc:HGNC:23575]	FALSE	TRUE	2.72762	5	9	4	High	High	High	High	Phospho [S49(99.5); S50(100); S1709(100); S2045(99); S2059(100); S2067(100); S2401(99.9)]	16.49
High	ENSP00000398837.1	pep chromosome:GRCh38:19:35718019:35738878:1 gene:ENSG00000272333.5 transcript:ENST00000420124.2 gene_biotype:protein_coding transcript_biotype:protein_coding gene_symbol:KMT2B description:lysine methyltransferase 2B [Source:HGNC Symbol;Acc:HGNC:15840]	FALSE	TRUE	3.20442	5	8	5	High	High	High	High	Phospho [S821(99.1); S844(100); S861(100); T2083(89.9)]	12.61
High	ENSP00000384899.2	pep chromosome:GRCh38:19:19427527:19508927:1 gene:ENSG00000167491.17 transcript:ENST00000404158.5 gene_biotype:protein_coding transcript_biotype:protein_coding gene_symbol:GATAD2A description:GATA zinc finger domain containing 2A [Source:HGNC Symbol;Acc:HGNC:29989]	FALSE	TRUE	8.67508	3	7	3	High	High	High	High	Phospho [T49(100); S100(100); S107(100); S114(93.5); S137(94.7)]	24.78
High	ENSP00000376333.3	pep chromosome:GRCh38:17:75525739:75575207:1 gene:ENSG00000073350.13 transcript:ENST00000392550.7 gene_biotype:protein_coding transcript_biotype:protein_coding gene_symbol:LLGL2 description:LLGL scribble cell polarity complex component 2 [Source:HGNC Symbol;Acc:HGNC:6629]	FALSE	TRUE	1.96078	3	9	3	High	High	High	High	Phospho [S649(100); S653(100); S965(100)]	18.26
High	ENSP00000264312.7	pep chromosome:GRCh38:4:48831065:48861248:1 gene:ENSG00000109180.14 transcript:ENST00000264312.11 gene_biotype:protein_coding transcript_biotype:protein_coding gene_symbol:OCIAD1 description:OCIA domain containing 1 [Source:HGNC Symbol;Acc:HGNC:16074]	FALSE	TRUE	9.38776	4	9	4	High	High	High	High	Phospho [S108(100)]	14.89
High	ENSP00000494277.1	pep chromosome:GRCh38:1:61742406:62163950:1 gene:ENSG00000132849.20 transcript:ENST00000642238.1 gene_biotype:protein_coding transcript_biotype:protein_coding gene_symbol:PATJ description:PATJ crumbs cell polarity complex component [Source:HGNC Symbol;Acc:HGNC:28881]	FALSE	TRUE	1.64718	2	6	2	High	High	High	High	Phospho [S645(100)]	20.92
High	ENSP00000495070.1	pep chromosome:GRCh38:14:21385495:21437308:-1 gene:ENSG00000100888.13 transcript:ENST00000643469.1 gene_biotype:protein_coding transcript_biotype:protein_coding gene_symbol:CHD8 description:chromodomain helicase DNA binding protein 8 [Source:HGNC Symbol;Acc:HGNC:20153]	FALSE	TRUE	2.09221	4	5	4	High	High	High	High	Phospho [S550(99.7); S553(100); S1995(90); S2046(91.3)]	17.28
High	ENSP00000380557.3	pep chromosome:GRCh38:19:15380050:15418988:-1 gene:ENSG00000011243.18 transcript:ENST00000397410.10 gene_biotype:protein_coding transcript_biotype:protein_coding gene_symbol:AKAP8L description:A-kinase anchoring protein 8 like [Source:HGNC Symbol;Acc:HGNC:29857]	FALSE	TRUE	6.65635	3	13	3	High	High	High	High	Phospho [S283(100); S302(97.8); T308(99.9)]	26.07
High	ENSP00000493252.1	pep chromosome:GRCh38:16:72782885:73891871:-1 gene:ENSG00000140836.17 transcript:ENST00000641206.2 gene_biotype:protein_coding transcript_biotype:protein_coding gene_symbol:ZFHX3 description:zinc finger homeobox 3 [Source:HGNC Symbol;Acc:HGNC:777]	FALSE	TRUE	1.94437	6	7	6	High	High	High	High	Phospho [S426(87.2); S2230(97.3); S2625(93.3); S2801(82.8); S3432(100)]	12.59
High	ENSP00000362409.3	pep chromosome:GRCh38:9:127505343:127569073:-1 gene:ENSG00000136830.12 transcript:ENST00000373312.4 gene_biotype:protein_coding transcript_biotype:protein_coding gene_symbol:NIBAN2 description:niban apoptosis regulator 2 [Source:HGNC Symbol;Acc:HGNC:25282]	FALSE	TRUE	7.23861	2	8	2	High	High	High	High	Phospho [S646(98.3)]	14.4
High	ENSP00000351490.4	pep chromosome:GRCh38:14:65075127:65102517:-1 gene:ENSG00000125952.20 transcript:ENST00000358664.9 gene_biotype:protein_coding transcript_biotype:protein_coding gene_symbol:MAX description:MYC associated factor X [Source:HGNC Symbol;Acc:HGNC:6913]	FALSE	TRUE	15.625	1	8	1	High	High	High	High	Phospho [S144(100)]	20.13
High	ENSP00000301396.5	pep chromosome:GRCh38:17:4671385:4704337:-1 gene:ENSG00000141456.16 transcript:ENST00000301396.8 gene_biotype:protein_coding transcript_biotype:protein_coding gene_symbol:PELP1 description:proline, glutamate and leucine rich protein 1 [Source:HGNC Symbol;Acc:HGNC:30134]	FALSE	TRUE	6.77966	3	7	3	High	High	High	High	Phospho [S531(89.6); T795(100); S1093(100)]	20.7
High	ENSP00000348381.4	pep chromosome:GRCh38:10:110007984:110135565:1 gene:ENSG00000148700.15 transcript:ENST00000356080.9 gene_biotype:protein_coding transcript_biotype:protein_coding gene_symbol:ADD3 description:adducin 3 [Source:HGNC Symbol;Acc:HGNC:245]	FALSE	TRUE	6.94051	4	10	3	High	High	High	High	Phospho [S423(100); S683(100); S693(100)]	14
High	ENSP00000221922.5	pep chromosome:GRCh38:19:47256525:47271953:1 gene:ENSG00000105321.14 transcript:ENST00000221922.11 gene_biotype:protein_coding transcript_biotype:protein_coding gene_symbol:CCDC9 description:coiled-coil domain containing 9 [Source:HGNC Symbol;Acc:HGNC:24560]	FALSE	TRUE	9.79284	3	8	3	High	High	High	High	Phospho [Y361(98.3); T385(92); S390(99.2); S521(100)]	18.79
High	ENSP00000310933.4	pep chromosome:GRCh38:11:47269674:47330031:1 gene:ENSG00000110514.19 transcript:ENST00000311027.9 gene_biotype:protein_coding transcript_biotype:protein_coding gene_symbol:MADD description:MAP kinase activating death domain [Source:HGNC Symbol;Acc:HGNC:6766]	FALSE	TRUE	3.27869	4	9	4	High	High	High	High	Phospho [S820(99.7); S930(100); S1059(99.1)]	17.68
High	ENSP00000334564.3	pep chromosome:GRCh38:1:145824200:145844402:1 gene:ENSG00000186141.9 transcript:ENST00000334163.4 gene_biotype:protein_coding transcript_biotype:protein_coding gene_symbol:POLR3C description:RNA polymerase III subunit C [Source:HGNC Symbol;Acc:HGNC:30076]	FALSE	TRUE	2.43446	2	8	2	High	High	High	High	Phospho [S204(96.6)]	15.92
High	ENSP00000376309.2	pep chromosome:GRCh38:2:177212563:177220085:1 gene:ENSG00000170144.20 transcript:ENST00000392524.6 gene_biotype:protein_coding transcript_biotype:protein_coding gene_symbol:HNRNPA3 description:heterogeneous nuclear ribonucleoprotein A3 [Source:HGNC Symbol;Acc:HGNC:24941]	FALSE	TRUE	7.67196	2	12	2	High	High	High	High	Phospho [S350(100); S358(99.7)]	18.41
High	ENSP00000269392.4	pep chromosome:GRCh38:17:81189596:81222999:-1 gene:ENSG00000141577.14 transcript:ENST00000269392.8 gene_biotype:protein_coding transcript_biotype:protein_coding gene_symbol:CEP131 description:centrosomal protein 131 [Source:HGNC Symbol;Acc:HGNC:29511]	FALSE	TRUE	4.89381	3	7	3	High	High	High	High	Phospho [S78(94); S89(98.9); S381(100)]	12.21
High	ENSP00000324422.5	pep chromosome:GRCh38:7:143381345:143391111:1 gene:ENSG00000159840.16 transcript:ENST00000322764.10 gene_biotype:protein_coding transcript_biotype:protein_coding gene_symbol:ZYX description:zyxin [Source:HGNC Symbol;Acc:HGNC:13200]	FALSE	TRUE	6.81818	3	6	3	High	High	High	High	Phospho [S259(93.5); S281(100); S344(100)]	11.22
High	ENSP00000359293.2	pep chromosome:GRCh38:X:152914490:152970541:1 gene:ENSG00000147394.18 transcript:ENST00000370270.6 gene_biotype:protein_coding transcript_biotype:protein_coding gene_symbol:ZNF185 description:zinc finger protein 185 with LIM domain [Source:HGNC Symbol;Acc:HGNC:12976]	FALSE	TRUE	10.1248	4	9	4	High	High	High	High	Phospho [T158(100); S485(99.4); S497(99.3)]	17.14
High	ENSP00000305721.7	pep chromosome:GRCh38:6:82169987:82247744:-1 gene:ENSG00000005700.15 transcript:ENST00000306270.12 gene_biotype:protein_coding transcript_biotype:protein_coding gene_symbol:IBTK description:inhibitor of Bruton tyrosine kinase [Source:HGNC Symbol;Acc:HGNC:17853]	FALSE	TRUE	4.95196	3	6	3	High	High	High	High	Phospho [S1004(99.3); S1045(100); S1116(100)]	19.75
High	ENSP00000328992.4	pep chromosome:GRCh38:21:32733899:32771755:-1 gene:ENSG00000159086.15 transcript:ENST00000331923.9 gene_biotype:protein_coding transcript_biotype:protein_coding gene_symbol:PAXBP1 description:PAX3 and PAX7 binding protein 1 [Source:HGNC Symbol;Acc:HGNC:13579]	FALSE	TRUE	2.18103	3	3	3	High	High	High	High	Phospho [S262(100)]	13.16
High	ENSP00000349291.3	pep chromosome:GRCh38:5:179862066:179907859:-1 gene:ENSG00000197226.12 transcript:ENST00000356834.7 gene_biotype:protein_coding transcript_biotype:protein_coding gene_symbol:TBC1D9B description:TBC1 domain family member 9B [Source:HGNC Symbol;Acc:HGNC:29097]	FALSE	TRUE	3.2	3	7	3	High	High	High	High	Phospho [S435(98.5)]	17.65
High	ENSP00000368017.3	pep chromosome:GRCh38:12:71609472:71663848:-1 gene:ENSG00000133858.16 transcript:ENST00000378743.8 gene_biotype:protein_coding transcript_biotype:protein_coding gene_symbol:ZFC3H1 description:zinc finger C3H1-type containing [Source:HGNC Symbol;Acc:HGNC:28328]	FALSE	TRUE	1.7094	3	10	3	High	High	High	High	Phospho [S194(100); S804(83.7); S948(93); S952(92.9)]	12.87
High	ENSP00000419713.1	pep chromosome:GRCh38:3:170866264:170870033:-1 gene:ENSG00000163584.18 transcript:ENST00000466674.5 gene_biotype:protein_coding transcript_biotype:protein_coding gene_symbol:RPL22L1 description:ribosomal protein L22 like 1 [Source:HGNC Symbol;Acc:HGNC:27610]	FALSE	TRUE	10.5634	1	8	1	High	High	High	High	Phospho [S138(100)]	29.97
High	ENSP00000220913.5	pep chromosome:GRCh38:8:140511322:140517154:1 gene:ENSG00000104472.10 transcript:ENST00000220913.10 gene_biotype:protein_coding transcript_biotype:protein_coding gene_symbol:CHRAC1 description:chromatin accessibility complex subunit 1 [Source:HGNC Symbol;Acc:HGNC:13544]	FALSE	TRUE	17.5573	2	6	2	High	High	High	High	Phospho [S124(100)]	16.19
High	ENSP00000353770.2	pep chromosome:GRCh38:2:10122328:10131418:1 gene:ENSG00000171848.15 transcript:ENST00000360566.6 gene_biotype:protein_coding transcript_biotype:protein_coding gene_symbol:RRM2 description:ribonucleotide reductase regulatory subunit M2 [Source:HGNC Symbol;Acc:HGNC:10452]	FALSE	TRUE	4.00891	1	3	1	High	High	High	High	Phospho [S80(100)]	13.2
High	ENSP00000239882.3	pep chromosome:GRCh38:13:40931924:41019316:-1 gene:ENSG00000120690.16 transcript:ENST00000239882.7 gene_biotype:protein_coding transcript_biotype:protein_coding gene_symbol:ELF1 description:E74 like ETS transcription factor 1 [Source:HGNC Symbol;Acc:HGNC:3316]	FALSE	TRUE	5.16963	2	8	2	High	High	High	High	Phospho [Y160(100); S168(99.7); T190(85.8)]	15.81
High	ENSP00000310129.4	pep chromosome:GRCh38:3:184299241:184309050:1 gene:ENSG00000175166.17 transcript:ENST00000310118.9 gene_biotype:protein_coding transcript_biotype:protein_coding gene_symbol:PSMD2 description:proteasome 26S subunit, non-ATPase 2 [Source:HGNC Symbol;Acc:HGNC:9559]	FALSE	TRUE	4.07489	3	4	3	High	High	High	High	Phospho [S16(100)]	11.31
High	ENSP00000363524.3	pep chromosome:GRCh38:X:70290104:70420886:1 gene:ENSG00000090889.12 transcript:ENST00000374403.4 gene_biotype:protein_coding transcript_biotype:protein_coding gene_symbol:KIF4A description:kinesin family member 4A [Source:HGNC Symbol;Acc:HGNC:13339]	FALSE	TRUE	2.43506	3	6	3	High	High	High	High	Phospho [S394(100); S801(99.9); S815(100)]	17.36
High	ENSP00000256996.3	pep chromosome:GRCh38:11:47214942:47239240:1 gene:ENSG00000134574.11 transcript:ENST00000256996.8 gene_biotype:protein_coding transcript_biotype:protein_coding gene_symbol:DDB2 description:damage specific DNA binding protein 2 [Source:HGNC Symbol;Acc:HGNC:2718]	FALSE	TRUE	2.8103	2	6	2	High	High	High	High	Phospho [S26(95.3)]	15.47
High	ENSP00000355011.4	pep chromosome:GRCh38:1:153661788:153670993:-1 gene:ENSG00000143621.17 transcript:ENST00000361891.9 gene_biotype:protein_coding transcript_biotype:protein_coding gene_symbol:ILF2 description:interleukin enhancer binding factor 2 [Source:HGNC Symbol;Acc:HGNC:6037]	FALSE	TRUE	13.5897	3	4	3	High	High	High	High	Phospho [T388(99.2)]	13.65
High	ENSP00000365147.4	pep chromosome:GRCh38:1:15409888:15430339:1 gene:ENSG00000142634.13 transcript:ENST00000375980.9 gene_biotype:protein_coding transcript_biotype:protein_coding gene_symbol:EFHD2 description:EF-hand domain family member D2 [Source:HGNC Symbol;Acc:HGNC:28670]	FALSE	TRUE	7.08333	3	4	3	High	High	High	High	Phospho [S74(95)]	11.13
High	ENSP00000497389.1	pep chromosome:GRCh38:11:706216:727692:1 gene:ENSG00000177106.16 transcript:ENST00000650127.1 gene_biotype:protein_coding transcript_biotype:protein_coding gene_symbol:EPS8L2 description:EPS8 like 2 [Source:HGNC Symbol;Acc:HGNC:21296]	FALSE	TRUE	6.47208	4	8	4	High	High	High	High	Phospho [S217(100); S240(100); S479(89.5); S570(99.6)]	11.47
High	ENSP00000384303.2	pep chromosome:GRCh38:2:70607618:70768198:-1 gene:ENSG00000075340.23 transcript:ENST00000403045.6 gene_biotype:protein_coding transcript_biotype:nonsense_mediated_decay gene_symbol:ADD2 description:adducin 2 [Source:HGNC Symbol;Acc:HGNC:244]	FALSE	TRUE	8.12672	5	6	4	High	High	High	High	Phospho [S592(100); S600(99.8); S713(100)]	13.77
High	ENSP00000264904.7	pep chromosome:GRCh38:4:75724598:75814286:1 gene:ENSG00000138768.14 transcript:ENST00000264904.8 gene_biotype:protein_coding transcript_biotype:protein_coding gene_symbol:USO1 description:USO1 vesicle transport factor [Source:HGNC Symbol;Acc:HGNC:30904]	FALSE	TRUE	5.24152	3	4	3	High	High	High	High	Phospho [S953(100)]	11.27
High	ENSP00000460328.1	pep chromosome:GRCh38:CHR_HSCHR22_1_CTG1:42147859:42203293:-1 gene:ENSG00000262024.6 transcript:ENST00000574943.5 gene_biotype:protein_coding transcript_biotype:protein_coding gene_symbol:TCF20 description:transcription factor 20 [Source:HGNC Symbol;Acc:HGNC:11631]	FALSE	TRUE	2.65306	5	12	5	High	High	High	High	Phospho [S559(99.6); S1134(100); S1322(100); T1764(99.5)]	19.78
High	ENSP00000368447.4	pep chromosome:GRCh38:13:44989552:45028270:1 gene:ENSG00000133114.17 transcript:ENST00000379151.8 gene_biotype:protein_coding transcript_biotype:protein_coding gene_symbol:GPALPP1 description:GPALPP motifs containing 1 [Source:HGNC Symbol;Acc:HGNC:20298]	FALSE	TRUE	12.9412	3	6	3	High	High	High	High	Phospho [S105(100); S140(90); S141(98.8)]	12.14
High	ENSP00000491480.1	pep chromosome:GRCh38:CHR_HSCHR17_3_CTG1:18244815:18258738:-1 gene:ENSG00000284571.2 transcript:ENST00000638207.2 gene_biotype:protein_coding transcript_biotype:protein_coding gene_symbol:FLII description:FLII actin remodeling protein [Source:HGNC Symbol;Acc:HGNC:3750]	FALSE	TRUE	1.97006	4	6	4	High	High	High	High	Phospho [S436(100); S856(100)]	12.76
High	ENSP00000262109.7	pep chromosome:GRCh38:8:664200:731224:-1 gene:ENSG00000104714.14 transcript:ENST00000262109.8 gene_biotype:protein_coding transcript_biotype:protein_coding gene_symbol:ERICH1 description:glutamate rich 1 [Source:HGNC Symbol;Acc:HGNC:27234]	FALSE	TRUE	8.57788	3	5	3	High	High	High	High	Phospho [S238(100); S254(100)]	16.36
High	ENSP00000484680.1	pep chromosome:GRCh38:2:27628996:27650844:1 gene:ENSG00000198522.14 transcript:ENST00000616939.4 gene_biotype:protein_coding transcript_biotype:protein_coding gene_symbol:GPN1 description:GPN-loop GTPase 1 [Source:HGNC Symbol;Acc:HGNC:17030]	FALSE	TRUE	5.15464	1	7	1	High	High	High	High	Phospho [S352(100)]	33.26
High	ENSP00000379983.2	pep chromosome:GRCh38:2:219219380:219229717:-1 gene:ENSG00000198925.12 transcript:ENST00000396761.6 gene_biotype:protein_coding transcript_biotype:protein_coding gene_symbol:ATG9A description:autophagy related 9A [Source:HGNC Symbol;Acc:HGNC:22408]	FALSE	TRUE	4.64839	2	6	2	High	High	High	High	Phospho [S735(100); S828(100)]	18
High	ENSP00000216455.4	pep chromosome:GRCh38:14:58244843:58272004:1 gene:ENSG00000100567.13 transcript:ENST00000216455.9 gene_biotype:protein_coding transcript_biotype:protein_coding gene_symbol:PSMA3 description:proteasome subunit alpha 3 [Source:HGNC Symbol;Acc:HGNC:9532]	FALSE	TRUE	5.4902	1	25	1	High	High	High	High	Phospho [S250(100)]	41.09
High	ENSP00000296121.4	pep chromosome:GRCh38:3:44748744:44761619:-1 gene:ENSG00000163807.6 transcript:ENST00000296121.6 gene_biotype:protein_coding transcript_biotype:protein_coding gene_symbol:KIAA1143 description:KIAA1143 [Source:HGNC Symbol;Acc:HGNC:29198]	FALSE	TRUE	25.974	2	6	2	High	High	High	High	Phospho [S50(100); S146(100)]	18.46
High	ENSP00000296564.7	pep chromosome:GRCh38:5:5422677:5490220:1 gene:ENSG00000164151.12 transcript:ENST00000296564.9 gene_biotype:protein_coding transcript_biotype:protein_coding gene_symbol:ICE1 description:interactor of little elongation complex ELL subunit 1 [Source:HGNC Symbol;Acc:HGNC:29154]	FALSE	TRUE	3.44219	6	7	6	High	High	High	High	Phospho [S533(93.1); S925(89.5); S1692(100); S1712(100); T1754(100); S1760(99.9); S1854(86.2)]	14.32
High	ENSP00000473921.1	pep chromosome:GRCh38:1:93448282:93551125:1 gene:ENSG00000137942.16 transcript:ENST00000604705.5 gene_biotype:protein_coding transcript_biotype:protein_coding gene_symbol:FNBP1L description:formin binding protein 1 like [Source:HGNC Symbol;Acc:HGNC:20851]	FALSE	TRUE	6.56814	3	5	3	High	High	High	High	Phospho [S295(93); S505(89.4)]	18.98
High	ENSP00000001008.4	pep chromosome:GRCh38:12:2794970:2805423:1 gene:ENSG00000004478.8 transcript:ENST00000001008.6 gene_biotype:protein_coding transcript_biotype:protein_coding gene_symbol:FKBP4 description:FKBP prolyl isomerase 4 [Source:HGNC Symbol;Acc:HGNC:3720]	FALSE	TRUE	6.97168	2	4	2	High	High	High	High	Phospho [S451(94.2)]	12.02
High	ENSP00000263377.1	pep chromosome:GRCh38:19:15235519:15280451:-1 gene:ENSG00000141867.17 transcript:ENST00000263377.6 gene_biotype:protein_coding transcript_biotype:protein_coding gene_symbol:BRD4 description:bromodomain containing 4 [Source:HGNC Symbol;Acc:HGNC:13575]	FALSE	TRUE	3.81791	4	8	4	High	High	High	High	Phospho [S470(91.5); S601(96.2); S1117(100)]	15.9
High	ENSP00000490119.1	pep chromosome:GRCh38:14:35539069:35809214:-1 gene:ENSG00000174373.16 transcript:ENST00000637992.1 gene_biotype:protein_coding transcript_biotype:protein_coding gene_symbol:RALGAPA1 description:Ral GTPase activating protein catalytic alpha subunit 1 [Source:HGNC Symbol;Acc:HGNC:17770]	FALSE	TRUE	1.56313	3	11	3	High	High	High	High	Phospho [S740(100)]	13.55
High	ENSP00000439032.1	pep chromosome:GRCh38:X:101623361:101627841:1 gene:ENSG00000102401.20 transcript:ENST00000537169.1 gene_biotype:protein_coding transcript_biotype:protein_coding gene_symbol:ARMCX3 description:armadillo repeat containing X-linked 3 [Source:HGNC Symbol;Acc:HGNC:24065]	FALSE	TRUE	3.95778	1	4	1	High	High	High	High	Phospho [S61(100); S67(100)]	19.46
High	ENSP00000470220.1	pep chromosome:GRCh38:19:34994784:35026471:1 gene:ENSG00000089351.14 transcript:ENST00000599564.5 gene_biotype:protein_coding transcript_biotype:protein_coding gene_symbol:GRAMD1A description:GRAM domain containing 1A [Source:HGNC Symbol;Acc:HGNC:29305]	FALSE	TRUE	4.7088	5	10	5	High	High	High	High	Phospho [S103(87.5); S354(100); T364(100)]	16.02
High	ENSP00000484229.1	pep chromosome:GRCh38:19:39356683:39384895:1 gene:ENSG00000179134.15 transcript:ENST00000610417.4 gene_biotype:protein_coding transcript_biotype:protein_coding gene_symbol:SAMD4B description:sterile alpha motif domain containing 4B [Source:HGNC Symbol;Acc:HGNC:25492]	FALSE	TRUE	8.06916	2	3	2	High	High	High	High	Phospho [S252(100); S271(100)]	12.47
High	ENSP00000363014.2	pep chromosome:GRCh38:20:36367149:36527190:1 gene:ENSG00000080845.17 transcript:ENST00000373907.6 gene_biotype:protein_coding transcript_biotype:protein_coding gene_symbol:DLGAP4 description:DLG associated protein 4 [Source:HGNC Symbol;Acc:HGNC:24476]	FALSE	TRUE	7.05645	3	5	3	High	High	High	High	Phospho [S716(100); S763(87.5); T915(100)]	16.84
High	ENSP00000378400.3	pep chromosome:GRCh38:12:50175788:50283506:-1 gene:ENSG00000050405.13 transcript:ENST00000394943.7 gene_biotype:protein_coding transcript_biotype:protein_coding gene_symbol:LIMA1 description:LIM domain and actin binding 1 [Source:HGNC Symbol;Acc:HGNC:24636]	FALSE	TRUE	8.28947	5	7	5	High	High	High	High	Phospho [S132(100); S363(99.7); S375(98.5); S491(100); S699(100)]	16.99
High	ENSP00000393596.2	pep chromosome:GRCh38:2:32357028:32618899:1 gene:ENSG00000115760.14 transcript:ENST00000421745.6 gene_biotype:protein_coding transcript_biotype:protein_coding gene_symbol:BIRC6 description:baculoviral IAP repeat containing 6 [Source:HGNC Symbol;Acc:HGNC:13516]	FALSE	TRUE	0.391188	1	4	1	High	High	High	High	Phospho [S480(100)]	21.02
High	ENSP00000216218.3	pep chromosome:GRCh38:22:40824535:40856639:-1 gene:ENSG00000100380.14 transcript:ENST00000216218.8 gene_biotype:protein_coding transcript_biotype:protein_coding gene_symbol:ST13 description:ST13 Hsp70 interacting protein [Source:HGNC Symbol;Acc:HGNC:11343]	FALSE	TRUE	4.06504	1	17	1	High	High	High	High	Phospho [S75(100); S76(100); S79(100)]	59.16
High	ENSP00000271277.6	pep chromosome:GRCh38:1:112396214:112461164:1 gene:ENSG00000143079.15 transcript:ENST00000271277.11 gene_biotype:protein_coding transcript_biotype:protein_coding gene_symbol:CTTNBP2NL description:CTTNBP2 N-terminal like [Source:HGNC Symbol;Acc:HGNC:25330]	FALSE	TRUE	6.72926	3	7	3	High	High	High	High	Phospho [S549(99.6); S568(90)]	9.69
High	ENSP00000394899.1	pep chromosome:GRCh38:1:15152532:15220477:1 gene:ENSG00000171729.14 transcript:ENST00000428417.5 gene_biotype:protein_coding transcript_biotype:protein_coding gene_symbol:TMEM51 description:transmembrane protein 51 [Source:HGNC Symbol;Acc:HGNC:25488]	FALSE	TRUE	28.0632	3	5	3	High	High	High	High	Phospho [S115(99.3); S182(100); T234(100)]	16.34
High	ENSP00000364398.4	pep chromosome:GRCh38:9:96450169:96491336:1 gene:ENSG00000130956.14 transcript:ENST00000375249.5 gene_biotype:protein_coding transcript_biotype:protein_coding gene_symbol:HABP4 description:hyaluronan binding protein 4 [Source:HGNC Symbol;Acc:HGNC:17062]	FALSE	TRUE	13.8015	3	3	3	High	High	High	High	Phospho [S7(100); S74(100); S108(100)]	11.89
High	ENSP00000452514.1	pep chromosome:GRCh38:12:55966821:55972121:1 gene:ENSG00000123374.11 transcript:ENST00000553376.5 gene_biotype:protein_coding transcript_biotype:protein_coding gene_symbol:CDK2 description:cyclin dependent kinase 2 [Source:HGNC Symbol;Acc:HGNC:1771]	FALSE	TRUE	6.6474	2	15	2	High	High	High	High	Phospho [Y15(100)]	25.21
High	ENSP00000446358.1	pep chromosome:GRCh38:9:13106943:13279407:-1 gene:ENSG00000107186.16 transcript:ENST00000546205.5 gene_biotype:protein_coding transcript_biotype:protein_coding gene_symbol:MPDZ description:multiple PDZ domain crumbs cell polarity complex component [Source:HGNC Symbol;Acc:HGNC:7208]	FALSE	TRUE	3.07102	4	5	4	High	High	High	High	Phospho [S230(100); S354(100)]	14.51
High	ENSP00000264313.5	pep chromosome:GRCh38:4:48341529:48426201:1 gene:ENSG00000109171.15 transcript:ENST00000264313.11 gene_biotype:protein_coding transcript_biotype:protein_coding gene_symbol:SLAIN2 description:SLAIN motif family member 2 [Source:HGNC Symbol;Acc:HGNC:29282]	FALSE	TRUE	9.29432	3	10	3	High	High	High	High	Phospho [S88(99.5); S134(99.6); S247(98.5)]	15.58
High	ENSP00000347498.4	pep chromosome:GRCh38:15:40807089:40815084:1 gene:ENSG00000166140.17 transcript:ENST00000355341.8 gene_biotype:protein_coding transcript_biotype:protein_coding gene_symbol:ZFYVE19 description:zinc finger FYVE-type containing 19 [Source:HGNC Symbol;Acc:HGNC:20758]	FALSE	TRUE	5.09554	2	4	2	High	High	High	High	Phospho [S144(100); S354(100)]	12.37
High	ENSP00000221455.3	pep chromosome:GRCh38:19:45039045:45070956:1 gene:ENSG00000104859.15 transcript:ENST00000221455.8 gene_biotype:protein_coding transcript_biotype:protein_coding gene_symbol:CLASRP description:CLK4 associating serine/arginine rich protein [Source:HGNC Symbol;Acc:HGNC:17731]	FALSE	TRUE	7.4184	6	10	6	High	High	High	High	Phospho [S288(93.7); S294(100); S303(91.2); S313(99.8); T319(99.8); S533(99.5); S535(100)]	14.3
High	ENSP00000348278.4	pep chromosome:GRCh38:2:167954022:168247595:-1 gene:ENSG00000198648.11 transcript:ENST00000355999.5 gene_biotype:protein_coding transcript_biotype:protein_coding gene_symbol:STK39 description:serine/threonine kinase 39 [Source:HGNC Symbol;Acc:HGNC:17717]	FALSE	TRUE	5.87156	3	5	3	High	High	High	High	Phospho [S385(100)]	8.2
High	ENSP00000389168.2	pep chromosome:GRCh38:12:79773568:79935097:-1 gene:ENSG00000058272.19 transcript:ENST00000450142.7 gene_biotype:protein_coding transcript_biotype:protein_coding gene_symbol:PPP1R12A description:protein phosphatase 1 regulatory subunit 12A [Source:HGNC Symbol;Acc:HGNC:7618]	FALSE	TRUE	4.17476	4	8	3	High	High	High	High	Phospho [S422(100); S472(99.5); S473(100); S862(100); S871(98.7)]	22.18
High	ENSP00000338235.3	pep chromosome:GRCh38:8:97644184:97730260:1 gene:ENSG00000147649.10 transcript:ENST00000336273.8 gene_biotype:protein_coding transcript_biotype:protein_coding gene_symbol:MTDH description:metadherin [Source:HGNC Symbol;Acc:HGNC:29608]	FALSE	TRUE	6.52921	3	7	3	High	High	High	High	Phospho [S308(92.6); S426(100); S568(100)]	10.86
High	ENSP00000482486.1	pep chromosome:GRCh38:19:10316219:10333638:-1 gene:ENSG00000161847.14 transcript:ENST00000611074.4 gene_biotype:protein_coding transcript_biotype:protein_coding gene_symbol:RAVER1 description:ribonucleoprotein, PTB binding 1 [Source:HGNC Symbol;Acc:HGNC:30296]	FALSE	TRUE	5.82011	3	4	3	High	High	High	High	Phospho [T480(100); S584(100); S634(99.8)]	8.78
High	ENSP00000346986.4	pep chromosome:GRCh38:10:28533118:28623112:1 gene:ENSG00000095787.23 transcript:ENST00000354911.9 gene_biotype:protein_coding transcript_biotype:protein_coding gene_symbol:WAC description:WW domain containing adaptor with coiled-coil [Source:HGNC Symbol;Acc:HGNC:17327]	FALSE	TRUE	4.32767	4	9	4	High	High	High	High	Phospho [S53(100); S64(100); S511(100)]	16.02
High	ENSP00000374529.5	pep chromosome:GRCh38:14:99481409:99512440:1 gene:ENSG00000090061.17 transcript:ENST00000389879.9 gene_biotype:protein_coding transcript_biotype:protein_coding gene_symbol:CCNK description:cyclin K [Source:HGNC Symbol;Acc:HGNC:1596]	FALSE	TRUE	3.62069	3	9	3	High	High	High	High	Phospho [S329(93); S340(100)]	8.46
High	ENSP00000494609.1	pep chromosome:GRCh38:13:95019835:95301451:-1 gene:ENSG00000125257.16 transcript:ENST00000645237.2 gene_biotype:protein_coding transcript_biotype:protein_coding gene_symbol:ABCC4 description:ATP binding cassette subfamily C member 4 [Source:HGNC Symbol;Acc:HGNC:55]	FALSE	TRUE	3.32075	4	10	4	High	High	High	High	Phospho [S404(100); T646(94.2); S668(99.5)]	19.11
High	ENSP00000216727.4	pep chromosome:GRCh38:14:23321289:23326185:1 gene:ENSG00000100836.10 transcript:ENST00000216727.8 gene_biotype:protein_coding transcript_biotype:protein_coding gene_symbol:PABPN1 description:poly(A) binding protein nuclear 1 [Source:HGNC Symbol;Acc:HGNC:8565]	FALSE	TRUE	21.5686	2	3	2	High	High	High	High	Phospho [S150(100)]	13.43
High	ENSP00000486320.1	pep chromosome:GRCh38:2:158457097:158680836:1 gene:ENSG00000144283.21 transcript:ENST00000628904.2 gene_biotype:protein_coding transcript_biotype:protein_coding gene_symbol:PKP4 description:plakophilin 4 [Source:HGNC Symbol;Acc:HGNC:9026]	FALSE	TRUE	3.72517	3	6	3	High	High	High	High	Phospho [S281(97.2); S314(100); S337(91.8)]	11.1
High	ENSP00000314724.8	pep chromosome:GRCh38:12:27524206:27695564:1 gene:ENSG00000110841.14 transcript:ENST00000318304.12 gene_biotype:protein_coding transcript_biotype:protein_coding gene_symbol:PPFIBP1 description:PPFIA binding protein 1 [Source:HGNC Symbol;Acc:HGNC:9249]	FALSE	TRUE	3.75865	3	9	3	High	High	High	High	Phospho [S466(95.1); S999(96)]	18.27
High	ENSP00000364119.2	pep chromosome:GRCh38:20:34088309:34112243:-1 gene:ENSG00000125977.7 transcript:ENST00000374980.3 gene_biotype:protein_coding transcript_biotype:protein_coding gene_symbol:EIF2S2 description:eukaryotic translation initiation factor 2 subunit beta [Source:HGNC Symbol;Acc:HGNC:3266]	FALSE	TRUE	12.6126	3	5	3	High	High	High	High	Phospho [S67(100); S105(99.8)]	16.77
High	ENSP00000287218.4	pep chromosome:GRCh38:6:37819727:38154624:1 gene:ENSG00000156639.12 transcript:ENST00000287218.9 gene_biotype:protein_coding transcript_biotype:protein_coding gene_symbol:ZFAND3 description:zinc finger AN1-type containing 3 [Source:HGNC Symbol;Acc:HGNC:18019]	FALSE	TRUE	7.04846	1	4	1	High	High	High	High	Phospho [S129(100)]	16.84
High	ENSP00000303758.4	pep chromosome:GRCh38:1:23084030:23177808:-1 gene:ENSG00000169641.13 transcript:ENST00000302291.8 gene_biotype:protein_coding transcript_biotype:protein_coding gene_symbol:LUZP1 description:leucine zipper protein 1 [Source:HGNC Symbol;Acc:HGNC:14985]	FALSE	TRUE	3.15985	3	7	3	High	High	High	High	Phospho [S394(100); S659(100)]	11.9
High	ENSP00000281513.5	pep chromosome:GRCh38:2:15166916:15561334:-1 gene:ENSG00000151779.13 transcript:ENST00000281513.10 gene_biotype:protein_coding transcript_biotype:protein_coding gene_symbol:NBAS description:neuroblastoma amplified sequence [Source:HGNC Symbol;Acc:HGNC:15625]	FALSE	TRUE	0.843526	1	4	1	High	High	High	High	Phospho [S473(99.4)]	12.99
High	ENSP00000305556.5	pep chromosome:GRCh38:2:70087477:70089203:1 gene:ENSG00000169564.7 transcript:ENST00000303577.7 gene_biotype:protein_coding transcript_biotype:protein_coding gene_symbol:PCBP1 description:poly(rC) binding protein 1 [Source:HGNC Symbol;Acc:HGNC:8647]	FALSE	TRUE	9.55056	2	7	1	High	High	High	High	Phospho [S189(99.6)]	12.92
High	ENSP00000317714.3	pep chromosome:GRCh38:16:31033558:31040164:1 gene:ENSG00000103496.15 transcript:ENST00000313843.8 gene_biotype:protein_coding transcript_biotype:protein_coding gene_symbol:STX4 description:syntaxin 4 [Source:HGNC Symbol;Acc:HGNC:11439]	FALSE	TRUE	10.7744	2	10	2	High	High	High	High	Phospho [S14(100); S15(100); S117(87.9)]	20.47
High	ENSP00000224237.5	pep chromosome:GRCh38:10:17229278:17237593:1 gene:ENSG00000026025.16 transcript:ENST00000224237.9 gene_biotype:protein_coding transcript_biotype:protein_coding gene_symbol:VIM description:vimentin [Source:HGNC Symbol;Acc:HGNC:12692]	FALSE	TRUE	10.9442	4	4	3	High	High	High	High	Phospho [S56(100); S459(100)]	12.15
High	ENSP00000371462.1	pep chromosome:GRCh38:15:43510958:43531620:1 gene:ENSG00000166963.13 transcript:ENST00000382031.5 gene_biotype:protein_coding transcript_biotype:protein_coding gene_symbol:MAP1A description:microtubule associated protein 1A [Source:HGNC Symbol;Acc:HGNC:6835]	FALSE	TRUE	1.6442	4	6	4	High	High	High	High	Phospho [S1913(100); S2260(100); S2330(100); S2689(91.3)]	13.29
High	ENSP00000340900.5	pep chromosome:GRCh38:1:222618097:222668007:1 gene:ENSG00000154305.18 transcript:ENST00000344922.10 gene_biotype:protein_coding transcript_biotype:protein_coding gene_symbol:MIA3 description:MIA SH3 domain ER export factor 3 [Source:HGNC Symbol;Acc:HGNC:24008]	FALSE	TRUE	3.93288	3	7	3	High	High	High	High	Phospho [T400(100); S1906(100)]	14.07
High	ENSP00000499094.1	pep chromosome:GRCh38:7:74650231:74760692:1 gene:ENSG00000263001.6 transcript:ENST00000650807.1 gene_biotype:protein_coding transcript_biotype:protein_coding gene_symbol:GTF2I description:general transcription factor IIi [Source:HGNC Symbol;Acc:HGNC:4659]	FALSE	TRUE	3.62381	4	10	4	High	High	High	High	Phospho [S371(99.7); T719(99.5); S835(100); S982(89.9)]	8.28
High	ENSP00000253108.3	pep chromosome:GRCh38:19:10115014:10119899:-1 gene:ENSG00000130811.12 transcript:ENST00000253108.9 gene_biotype:protein_coding transcript_biotype:protein_coding gene_symbol:EIF3G description:eukaryotic translation initiation factor 3 subunit G [Source:HGNC Symbol;Acc:HGNC:3274]	FALSE	TRUE	7.8125	1	13	1	High	High	High	High	Phospho [S42(100)]	22.93
High	ENSP00000263681.2	pep chromosome:GRCh38:11:74592582:74643076:1 gene:ENSG00000077514.9 transcript:ENST00000263681.7 gene_biotype:protein_coding transcript_biotype:protein_coding gene_symbol:POLD3 description:DNA polymerase delta 3, accessory subunit [Source:HGNC Symbol;Acc:HGNC:20932]	FALSE	TRUE	6.86695	3	13	3	High	High	High	High	Phospho [S307(93.7); T411(100); S413(100)]	23.04
High	ENSP00000317123.5	pep chromosome:GRCh38:2:96274338:96305546:-1 gene:ENSG00000144028.15 transcript:ENST00000323853.10 gene_biotype:protein_coding transcript_biotype:protein_coding gene_symbol:SNRNP200 description:small nuclear ribonucleoprotein U5 subunit 200 [Source:HGNC Symbol;Acc:HGNC:30859]	FALSE	TRUE	1.17041	2	6	2	High	High	High	High	Phospho [S225(100); S2135(100)]	22.23
High	ENSP00000314499.4	pep chromosome:GRCh38:4:849277:932316:-1 gene:ENSG00000178950.17 transcript:ENST00000314167.9 gene_biotype:protein_coding transcript_biotype:protein_coding gene_symbol:GAK description:cyclin G associated kinase [Source:HGNC Symbol;Acc:HGNC:4113]	FALSE	TRUE	2.59344	1	6	1	High	High	High	High	Phospho [S780(92.8)]	12.93
High	ENSP00000390158.2	pep chromosome:GRCh38:15:63608618:63833948:-1 gene:ENSG00000103657.14 transcript:ENST00000443617.7 gene_biotype:protein_coding transcript_biotype:protein_coding gene_symbol:HERC1 description:HECT and RLD domain containing E3 ubiquitin protein ligase family member 1 [Source:HGNC Symbol;Acc:HGNC:4867]	FALSE	TRUE	0.658301	2	3	2	High	High	High	High	Phospho [S1521(99.9); S4857(100)]	13.5
High	ENSP00000269967.2	pep chromosome:GRCh38:19:41310172:41324873:1 gene:ENSG00000142039.4 transcript:ENST00000269967.4 gene_biotype:protein_coding transcript_biotype:protein_coding gene_symbol:CCDC97 description:coiled-coil domain containing 97 [Source:HGNC Symbol;Acc:HGNC:28289]	FALSE	TRUE	13.9942	2	6	2	High	High	High	High	Phospho [S212(100); S337(100)]	12.62
High	ENSP00000280377.5	pep chromosome:GRCh38:12:62260404:62416389:1 gene:ENSG00000135655.16 transcript:ENST00000280377.10 gene_biotype:protein_coding transcript_biotype:protein_coding gene_symbol:USP15 description:ubiquitin specific peptidase 15 [Source:HGNC Symbol;Acc:HGNC:12613]	FALSE	TRUE	3.26198	1	4	1	High	High	High	High	Phospho [S961(100)]	17.29
High	ENSP00000380763.2	pep chromosome:GRCh38:22:30925130:30968774:-1 gene:ENSG00000133422.13 transcript:ENST00000397641.8 gene_biotype:protein_coding transcript_biotype:protein_coding gene_symbol:MORC2 description:MORC family CW-type zinc finger 2 [Source:HGNC Symbol;Acc:HGNC:23573]	FALSE	TRUE	5.52326	5	5	5	High	High	High	High	Phospho [S615(100); S725(100); S743(100); S777(100); S779(100)]	8.88
High	ENSP00000363642.4	pep chromosome:GRCh38:10:42782795:42834937:1 gene:ENSG00000165733.8 transcript:ENST00000374518.6 gene_biotype:protein_coding transcript_biotype:protein_coding gene_symbol:BMS1 description:BMS1 ribosome biogenesis factor [Source:HGNC Symbol;Acc:HGNC:23505]	FALSE	TRUE	5.30421	3	6	3	High	High	High	High	Phospho [S525(99.7); S552(100); S639(79.8)]	12.7
High	ENSP00000324792.4	pep chromosome:GRCh38:16:28950937:28967097:1 gene:ENSG00000176953.12 transcript:ENST00000320805.8 gene_biotype:protein_coding transcript_biotype:protein_coding gene_symbol:NFATC2IP description:nuclear factor of activated T cells 2 interacting protein [Source:HGNC Symbol;Acc:HGNC:25906]	FALSE	TRUE	8.59189	3	5	3	High	High	High	High	Phospho [S92(100); S204(99.1)]	13.26
High	ENSP00000387006.3	pep chromosome:GRCh38:2:179944876:180007297:-1 gene:ENSG00000163510.14 transcript:ENST00000410053.8 gene_biotype:protein_coding transcript_biotype:protein_coding gene_symbol:CWC22 description:CWC22 spliceosome associated protein homolog [Source:HGNC Symbol;Acc:HGNC:29322]	FALSE	TRUE	2.7533	3	9	3	High	High	High	High	Phospho [S39(100); S831(95.4)]	18.08
High	ENSP00000265343.5	pep chromosome:GRCh38:5:132875395:132963634:-1 gene:ENSG00000072364.13 transcript:ENST00000265343.10 gene_biotype:protein_coding transcript_biotype:protein_coding gene_symbol:AFF4 description:AF4/FMR2 family member 4 [Source:HGNC Symbol;Acc:HGNC:17869]	FALSE	TRUE	7.05073	6	8	6	High	High	High	High	Phospho [S212(89); S549(100); S620(99.5); S694(100); S703(88.7); S821(90.8)]	14.89
High	ENSP00000465387.1	pep chromosome:GRCh38:19:12689216:12696581:-1 gene:ENSG00000132004.13 transcript:ENST00000587955.1 gene_biotype:protein_coding transcript_biotype:protein_coding gene_symbol:FBXW9 description:F-box and WD repeat domain containing 9 [Source:HGNC Symbol;Acc:HGNC:28136]	FALSE	TRUE	5.23013	2	6	1	High	High	High	High	Phospho [S18(94.8); S39(100)]	16.17
High	ENSP00000244020.3	pep chromosome:GRCh38:20:43457896:43464243:1 gene:ENSG00000124193.16 transcript:ENST00000244020.5 gene_biotype:protein_coding transcript_biotype:protein_coding gene_symbol:SRSF6 description:serine and arginine rich splicing factor 6 [Source:HGNC Symbol;Acc:HGNC:10788]	FALSE	TRUE	13.0814	6	20	6	High	High	High	High	Phospho [S259(99.9); S261(100); S263(100); S314(100); S316(100); S324(98.2); S326(99.9); S328(99.9)]	12.85
High	ENSP00000362942.3	pep chromosome:GRCh38:1:28438171:28497303:1 gene:ENSG00000204138.13 transcript:ENST00000373836.4 gene_biotype:protein_coding transcript_biotype:protein_coding gene_symbol:PHACTR4 description:phosphatase and actin regulator 4 [Source:HGNC Symbol;Acc:HGNC:25793]	FALSE	TRUE	11.236	4	8	4	High	High	High	High	Phospho [S128(99.7); S188(84.1); S301(100); S354(86.9); T359(99.2)]	15.64
High	ENSP00000212015.6	pep chromosome:GRCh38:10:67884656:67918390:1 gene:ENSG00000096717.12 transcript:ENST00000212015.11 gene_biotype:protein_coding transcript_biotype:protein_coding gene_symbol:SIRT1 description:sirtuin 1 [Source:HGNC Symbol;Acc:HGNC:14929]	FALSE	TRUE	4.2838	4	10	4	High	High	High	High	Phospho [S27(93.4); S47(100)]	17.45
High	ENSP00000268138.7	pep chromosome:GRCh38:15:89575469:89628023:1 gene:ENSG00000140534.14 transcript:ENST00000268138.12 gene_biotype:protein_coding transcript_biotype:protein_coding gene_symbol:TICRR description:TOPBP1 interacting checkpoint and replication regulator [Source:HGNC Symbol;Acc:HGNC:28704]	FALSE	TRUE	3.50785	4	4	4	High	High	High	High	Phospho [S838(99.7); S1001(100); S1078(100); S1430(99.4); S1433(100)]	11.85
High	ENSP00000431355.2	pep chromosome:GRCh38:11:33084595:33161494:-1 gene:ENSG00000176102.13 transcript:ENST00000524827.6 gene_biotype:protein_coding transcript_biotype:protein_coding gene_symbol:CSTF3 description:cleavage stimulation factor subunit 3 [Source:HGNC Symbol;Acc:HGNC:2485]	FALSE	TRUE	3.20427	2	8	2	High	High	High	High	Phospho [S723(100)]	24.42
High	ENSP00000369757.4	pep chromosome:GRCh38:9:19375715:19380236:-1 gene:ENSG00000137154.13 transcript:ENST00000380394.9 gene_biotype:protein_coding transcript_biotype:protein_coding gene_symbol:RPS6 description:ribosomal protein S6 [Source:HGNC Symbol;Acc:HGNC:10429]	FALSE	TRUE	10.0402	4	13	4	High	High	High	High	Phospho [S235(100); S236(100); S244(92.5)]	8.4
High	ENSP00000374273.3	pep chromosome:GRCh38:3:97822011:97944984:1 gene:ENSG00000080200.10 transcript:ENST00000389622.7 gene_biotype:protein_coding transcript_biotype:protein_coding gene_symbol:CRYBG3 description:crystallin beta-gamma domain containing 3 [Source:HGNC Symbol;Acc:HGNC:34427]	FALSE	TRUE	1.78451	3	5	3	High	High	High	High	Phospho [S23(85.1); S395(100); S457(100)]	5.96
High	ENSP00000419412.1	pep chromosome:GRCh38:7:151058212:151076526:1 gene:ENSG00000164889.14 transcript:ENST00000485713.5 gene_biotype:protein_coding transcript_biotype:protein_coding gene_symbol:SLC4A2 description:solute carrier family 4 member 2 [Source:HGNC Symbol;Acc:HGNC:11028]	FALSE	TRUE	5.96293	3	11	3	High	High	High	High	Phospho [S132(100); S144(89.4)]	15.14
High	ENSP00000219476.3	pep chromosome:GRCh38:16:2047985:2089491:1 gene:ENSG00000103197.18 transcript:ENST00000219476.9 gene_biotype:protein_coding transcript_biotype:protein_coding gene_symbol:TSC2 description:TSC complex subunit 2 [Source:HGNC Symbol;Acc:HGNC:12363]	FALSE	TRUE	4.37189	6	11	6	High	High	High	High	Phospho [S1132(100); S1338(93.4); S1388(81.4); S1411(100); S1454(90)]	13.52
High	ENSP00000297338.2	pep chromosome:GRCh38:8:116845935:116874866:-1 gene:ENSG00000164754.14 transcript:ENST00000297338.6 gene_biotype:protein_coding transcript_biotype:protein_coding gene_symbol:RAD21 description:RAD21 cohesin complex component [Source:HGNC Symbol;Acc:HGNC:9811]	FALSE	TRUE	3.96197	2	2	2	High	High	High	High	Phospho [S545(100)]	11.78
High	ENSP00000386864.1	pep chromosome:GRCh38:2:85616169:85649280:1 gene:ENSG00000168883.20 transcript:ENST00000409470.5 gene_biotype:protein_coding transcript_biotype:protein_coding gene_symbol:USP39 description:ubiquitin specific peptidase 39 [Source:HGNC Symbol;Acc:HGNC:20071]	FALSE	TRUE	2.65487	3	7	3	High	High	High	High	Phospho [S82(100)]	11.74
High	ENSP00000366702.5	pep chromosome:GRCh38:1:8011727:8026309:-1 gene:ENSG00000116285.13 transcript:ENST00000377482.10 gene_biotype:protein_coding transcript_biotype:protein_coding gene_symbol:ERRFI1 description:ERBB receptor feedback inhibitor 1 [Source:HGNC Symbol;Acc:HGNC:18185]	FALSE	TRUE	11.2554	4	10	4	High	High	High	High	Phospho [S273(99.9); S302(100); S369(100)]	21.06
High	ENSP00000378500.1	pep chromosome:GRCh38:7:74317547:74403848:1 gene:ENSG00000106665.15 transcript:ENST00000395060.5 gene_biotype:protein_coding transcript_biotype:protein_coding gene_symbol:CLIP2 description:CAP-Gly domain containing linker protein 2 [Source:HGNC Symbol;Acc:HGNC:2586]	FALSE	TRUE	3.82409	4	12	4	High	High	High	High	Phospho [S18(89.3); S42(100); S204(90.6); S207(99); S292(92.3)]	25.15
High	ENSP00000269571.4	pep chromosome:GRCh38:17:39700080:39728662:1 gene:ENSG00000141736.13 transcript:ENST00000269571.9 gene_biotype:protein_coding transcript_biotype:protein_coding gene_symbol:ERBB2 description:erb-b2 receptor tyrosine kinase 2 [Source:HGNC Symbol;Acc:HGNC:3430]	FALSE	TRUE	3.42629	2	4	2	High	High	High	High	Phospho [S1054(100)]	12.21
High	ENSP00000410608.1	pep chromosome:GRCh38:2:55287842:55419856:-1 gene:ENSG00000115355.17 transcript:ENST00000436346.7 gene_biotype:protein_coding transcript_biotype:protein_coding gene_symbol:CCDC88A description:coiled-coil domain containing 88A [Source:HGNC Symbol;Acc:HGNC:25523]	FALSE	TRUE	2.19134	3	8	3	High	High	High	High	Phospho [S1678(92.1)]	10.96
High	ENSP00000364289.3	pep chromosome:GRCh38:9:97633821:97673748:1 gene:ENSG00000136937.13 transcript:ENST00000375147.8 gene_biotype:protein_coding transcript_biotype:protein_coding gene_symbol:NCBP1 description:nuclear cap binding protein subunit 1 [Source:HGNC Symbol;Acc:HGNC:7658]	FALSE	TRUE	4.05063	2	6	2	High	High	High	High	Phospho [S7(100)]	12.16
High	ENSP00000339030.5	pep chromosome:GRCh38:11:58579063:58621550:1 gene:ENSG00000186660.15 transcript:ENST00000316059.7 gene_biotype:protein_coding transcript_biotype:protein_coding gene_symbol:ZFP91 description:ZFP91 zinc finger protein [Source:HGNC Symbol;Acc:HGNC:14983]	FALSE	TRUE	4.73684	3	7	3	High	High	High	High	Phospho [S83(98.9); S296(100)]	8.93
High	ENSP00000340507.4	pep chromosome:GRCh38:7:138460259:138589996:1 gene:ENSG00000122779.18 transcript:ENST00000343526.9 gene_biotype:protein_coding transcript_biotype:protein_coding gene_symbol:TRIM24 description:tripartite motif containing 24 [Source:HGNC Symbol;Acc:HGNC:11812]	FALSE	TRUE	3.61905	3	8	3	High	High	High	High	Phospho [S811(98.2); S1028(100)]	21
High	ENSP00000485350.1	pep chromosome:GRCh38:2:69457997:69509280:-1 gene:ENSG00000115977.19 transcript:ENST00000606389.5 gene_biotype:protein_coding transcript_biotype:protein_coding gene_symbol:AAK1 description:AP2 associated kinase 1 [Source:HGNC Symbol;Acc:HGNC:19679]	FALSE	TRUE	5.67515	2	8	1	High	High	High	High	Phospho [S249(100)]	9.93
High	ENSP00000362656.4	pep chromosome:GRCh38:9:124878275:124941083:-1 gene:ENSG00000136935.14 transcript:ENST00000373555.9 gene_biotype:protein_coding transcript_biotype:protein_coding gene_symbol:GOLGA1 description:golgin A1 [Source:HGNC Symbol;Acc:HGNC:4424]	FALSE	TRUE	3.38983	2	4	2	High	High	High	High	Phospho [S30(96.8); S41(100)]	15.88
High	ENSP00000299213.7	pep chromosome:GRCh38:15:70829130:70854157:-1 gene:ENSG00000166173.11 transcript:ENST00000299213.10 gene_biotype:protein_coding transcript_biotype:protein_coding gene_symbol:LARP6 description:La ribonucleoprotein domain family member 6 [Source:HGNC Symbol;Acc:HGNC:24012]	FALSE	TRUE	5.09165	2	6	2	High	High	High	High	Phospho [S58(100); S396(100)]	12.8
High	ENSP00000486525.1	pep chromosome:GRCh38:9:128203397:128255244:1 gene:ENSG00000106976.20 transcript:ENST00000628346.2 gene_biotype:protein_coding transcript_biotype:protein_coding gene_symbol:DNM1 description:dynamin 1 [Source:HGNC Symbol;Acc:HGNC:2972]	FALSE	TRUE	3.81944	3	15	3	High	High	High	High	Phospho [S774(94); S847(84.2)]	26.26
High	ENSP00000377195.1	pep chromosome:GRCh38:5:177456936:177473637:-1 gene:ENSG00000113758.13 transcript:ENST00000393565.5 gene_biotype:protein_coding transcript_biotype:protein_coding gene_symbol:DBN1 description:drebrin 1 [Source:HGNC Symbol;Acc:HGNC:2695]	FALSE	TRUE	7.91367	4	11	4	High	High	High	High	Phospho [S25(78.6); Y34(85.4); S38(96.2); S383(93.1)]	18.49
High	ENSP00000268835.2	pep chromosome:GRCh38:17:18858131:18931287:1 gene:ENSG00000141127.15 transcript:ENST00000268835.7 gene_biotype:protein_coding transcript_biotype:protein_coding gene_symbol:PRPSAP2 description:phosphoribosyl pyrophosphate synthetase associated protein 2 [Source:HGNC Symbol;Acc:HGNC:9467]	FALSE	TRUE	7.58808	2	6	2	High	High	High	High	Phospho [S227(100)]	9.36
High	ENSP00000498469.1	pep chromosome:GRCh38:5:90474864:90514557:1 gene:ENSG00000113356.12 transcript:ENST00000651687.1 gene_biotype:protein_coding transcript_biotype:protein_coding gene_symbol:POLR3G description:RNA polymerase III subunit G [Source:HGNC Symbol;Acc:HGNC:30075]	FALSE	TRUE	8.07175	3	6	3	High	High	High	High	Phospho [S157(100)]	4.19
High	ENSP00000264258.3	pep chromosome:GRCh38:2:101002289:101007267:1 gene:ENSG00000071082.11 transcript:ENST00000264258.8 gene_biotype:protein_coding transcript_biotype:protein_coding gene_symbol:RPL31 description:ribosomal protein L31 [Source:HGNC Symbol;Acc:HGNC:10334]	FALSE	TRUE	26.4	3	6	3	High	High	High	High	Phospho [Y103(87.5)]	10.51
High	ENSP00000348489.5	pep chromosome:GRCh38:16:30658431:30670810:1 gene:ENSG00000156860.16 transcript:ENST00000356166.11 gene_biotype:protein_coding transcript_biotype:protein_coding gene_symbol:FBRS description:fibrosin [Source:HGNC Symbol;Acc:HGNC:20442]	FALSE	TRUE	3.97959	3	9	3	High	High	High	High	Phospho [S189(100); S190(100); S333(100); S801(99.9)]	18.32
High	ENSP00000354674.3	pep chromosome:GRCh38:6:35833034:35921047:-1 gene:ENSG00000096063.16 transcript:ENST00000361690.7 gene_biotype:protein_coding transcript_biotype:protein_coding gene_symbol:SRPK1 description:SRSF protein kinase 1 [Source:HGNC Symbol;Acc:HGNC:11305]	FALSE	TRUE	7.45156	3	6	3	High	High	High	High	Phospho [S67(100); S327(99.4)]	4.76
High	ENSP00000403524.3	pep chromosome:GRCh38:12:111642146:111685956:-1 gene:ENSG00000089234.16 transcript:ENST00000419234.9 gene_biotype:protein_coding transcript_biotype:protein_coding gene_symbol:BRAP description:BRCA1 associated protein [Source:HGNC Symbol;Acc:HGNC:1099]	FALSE	TRUE	3.88514	3	6	3	High	High	High	High	Phospho [S117(100)]	13.34
High	ENSP00000440440.1	pep chromosome:GRCh38:12:14385064:14498763:1 gene:ENSG00000171681.12 transcript:ENST00000544627.5 gene_biotype:protein_coding transcript_biotype:protein_coding gene_symbol:ATF7IP description:activating transcription factor 7 interacting protein [Source:HGNC Symbol;Acc:HGNC:20092]	FALSE	TRUE	3.83412	4	7	4	High	High	High	High	Phospho [S121(100); S567(100); S681(100)]	18.65
High	ENSP00000331678.2	pep chromosome:GRCh38:11:394209:404908:1 gene:ENSG00000184363.10 transcript:ENST00000331563.7 gene_biotype:protein_coding transcript_biotype:protein_coding gene_symbol:PKP3 description:plakophilin 3 [Source:HGNC Symbol;Acc:HGNC:9025]	FALSE	TRUE	3.88959	2	9	2	High	High	High	High	Phospho [S238(99.8); S313(94.9)]	18.34
High	ENSP00000240316.4	pep chromosome:GRCh38:17:56938199:56961050:-1 gene:ENSG00000121058.5 transcript:ENST00000240316.5 gene_biotype:protein_coding transcript_biotype:protein_coding gene_symbol:COIL description:coilin [Source:HGNC Symbol;Acc:HGNC:2184]	FALSE	TRUE	7.8125	4	11	4	High	High	High	High	Phospho [T122(100); S202(100); T303(100); S566(99.8)]	20.48
High	ENSP00000347169.3	pep chromosome:GRCh38:14:73275210:73355769:-1 gene:ENSG00000133961.20 transcript:ENST00000355058.7 gene_biotype:protein_coding transcript_biotype:protein_coding gene_symbol:NUMB description:NUMB endocytic adaptor protein [Source:HGNC Symbol;Acc:HGNC:8060]	FALSE	TRUE	10.7527	5	12	5	High	High	High	High	Phospho [S438(94.2)]	7.57
High	ENSP00000250454.3	pep chromosome:GRCh38:14:34515938:34539701:-1 gene:ENSG00000129518.9 transcript:ENST00000250454.8 gene_biotype:protein_coding transcript_biotype:protein_coding gene_symbol:EAPP description:E2F associated phosphoprotein [Source:HGNC Symbol;Acc:HGNC:19312]	FALSE	TRUE	5.61404	1	9	1	High	High	High	High	Phospho [S109(100); S111(100)]	30.22
High	ENSP00000354491.4	pep chromosome:GRCh38:14:22971819:22982338:-1 gene:ENSG00000129474.16 transcript:ENST00000361265.8 gene_biotype:protein_coding transcript_biotype:protein_coding gene_symbol:AJUBA description:ajuba LIM protein [Source:HGNC Symbol;Acc:HGNC:20250]	FALSE	TRUE	13.197	5	6	5	High	High	High	High	Phospho [S79(100); S137(92.3); S263(100)]	9.98
High	ENSP00000397367.1	pep chromosome:GRCh38:4:4267704:4290021:-1 gene:ENSG00000145220.14 transcript:ENST00000452476.5 gene_biotype:protein_coding transcript_biotype:protein_coding gene_symbol:LYAR description:Ly1 antibody reactive [Source:HGNC Symbol;Acc:HGNC:26021]	FALSE	TRUE	2.63852	2	12	2	High	High	High	High	Phospho [S258(100); S260(100)]	19.22
High	ENSP00000258098.6	pep chromosome:GRCh38:2:73073382:73113018:-1 gene:ENSG00000135631.16 transcript:ENST00000258098.6 gene_biotype:protein_coding transcript_biotype:protein_coding gene_symbol:RAB11FIP5 description:RAB11 family interacting protein 5 [Source:HGNC Symbol;Acc:HGNC:24845]	FALSE	TRUE	6.73813	4	8	1	High	High	High	High	Phospho [S307(99.9); S482(94.6); S538(98.7)]	7.25
High	ENSP00000433979.1	pep chromosome:GRCh38:8:144104512:144107611:1 gene:ENSG00000179632.10 transcript:ENST00000534585.5 gene_biotype:protein_coding transcript_biotype:protein_coding gene_symbol:MAF1 description:MAF1 homolog, negative regulator of RNA polymerase III [Source:HGNC Symbol;Acc:HGNC:24966]	FALSE	TRUE	13.6364	2	5	2	High	High	High	High	Phospho [S75(100)]	12
High	ENSP00000472300.1	pep chromosome:GRCh38:19:49861231:49867286:-1 gene:ENSG00000039650.12 transcript:ENST00000596014.5 gene_biotype:protein_coding transcript_biotype:protein_coding gene_symbol:PNKP description:polynucleotide kinase 3'-phosphatase [Source:HGNC Symbol;Acc:HGNC:9154]	FALSE	TRUE	3.83877	1	4	1	High	High	High	High	Phospho [T118(100); T122(100)]	14.04
High	ENSP00000411061.2	pep chromosome:GRCh38:17:7687440:7703502:1 gene:ENSG00000141499.16 transcript:ENST00000457584.6 gene_biotype:protein_coding transcript_biotype:protein_coding gene_symbol:WRAP53 description:WD repeat containing antisense to TP53 [Source:HGNC Symbol;Acc:HGNC:25522]	FALSE	TRUE	12.4088	3	4	3	High	High	High	High	Phospho [S54(99.9); S90(100)]	14.3
High	ENSP00000261503.5	pep chromosome:GRCh38:17:20087022:20314755:1 gene:ENSG00000128487.16 transcript:ENST00000261503.9 gene_biotype:protein_coding transcript_biotype:protein_coding gene_symbol:SPECC1 description:sperm antigen with calponin homology and coiled-coil domains 1 [Source:HGNC Symbol;Acc:HGNC:30615]	FALSE	TRUE	4.11985	3	8	3	High	High	High	High	Phospho [S810(99.1)]	12.58
High	ENSP00000261667.3	pep chromosome:GRCh38:13:49699320:49792682:-1 gene:ENSG00000102753.10 transcript:ENST00000261667.8 gene_biotype:protein_coding transcript_biotype:protein_coding gene_symbol:KPNA3 description:karyopherin subunit alpha 3 [Source:HGNC Symbol;Acc:HGNC:6396]	FALSE	TRUE	3.45489	1	6	1	High	High	High	High	Phospho [S60(100)]	19.37
High	ENSP00000362711.1	pep chromosome:GRCh38:1:32180065:32198285:1 gene:ENSG00000084652.16 transcript:ENST00000373609.1 gene_biotype:protein_coding transcript_biotype:protein_coding gene_symbol:TXLNA description:taxilin alpha [Source:HGNC Symbol;Acc:HGNC:30685]	FALSE	TRUE	9.15751	2	6	2	High	High	High	High	Phospho [S515(94.5)]	5.97
High	ENSP00000354964.2	pep chromosome:GRCh38:6:43336070:43369647:-1 gene:ENSG00000171467.16 transcript:ENST00000361428.3 gene_biotype:protein_coding transcript_biotype:protein_coding gene_symbol:ZNF318 description:zinc finger protein 318 [Source:HGNC Symbol;Acc:HGNC:13578]	FALSE	TRUE	1.75516	5	9	4	High	High	High	High	Phospho [S69(100); S71(100); S305(100); S307(100); S527(100)]	9.77
High	ENSP00000254480.5	pep chromosome:GRCh38:3:47585269:47781893:-1 gene:ENSG00000173473.11 transcript:ENST00000254480.10 gene_biotype:protein_coding transcript_biotype:protein_coding gene_symbol:SMARCC1 description:SWI/SNF related, matrix associated, actin dependent regulator of chromatin subfamily c member 1 [Source:HGNC Symbol;Acc:HGNC:11104]	FALSE	TRUE	3.07692	4	9	4	High	High	High	High	Phospho [S310(100); S328(100); S330(100); T398(100)]	17.33
High	ENSP00000311747.4	pep chromosome:GRCh38:11:66616582:66627347:1 gene:ENSG00000239306.4 transcript:ENST00000310137.4 gene_biotype:protein_coding transcript_biotype:protein_coding gene_symbol:RBM14 description:RNA binding motif protein 14 [Source:HGNC Symbol;Acc:HGNC:14219]	FALSE	TRUE	7.92227	3	9	3	High	High	High	High	Phospho [T206(100); S582(100)]	8.94
High	ENSP00000434033.2	pep chromosome:GRCh38:1:21597008:21651836:-1 gene:ENSG00000076864.19 transcript:ENST00000495204.5 gene_biotype:protein_coding transcript_biotype:protein_coding gene_symbol:RAP1GAP description:RAP1 GTPase activating protein [Source:HGNC Symbol;Acc:HGNC:9858]	FALSE	TRUE	6.46492	3	12	3	High	High	High	High	Phospho [S548(99.6); S563(95)]	21.96
High	ENSP00000312081.4	pep chromosome:GRCh38:11:67303530:67312592:1 gene:ENSG00000172830.13 transcript:ENST00000308127.9 gene_biotype:protein_coding transcript_biotype:protein_coding gene_symbol:SSH3 description:slingshot protein phosphatase 3 [Source:HGNC Symbol;Acc:HGNC:30581]	FALSE	TRUE	6.22155	2	5	2	High	High	High	High	Phospho [S85(87.9); S649(100); S653(100)]	14.3
High	ENSP00000201586.1	pep chromosome:GRCh38:19:48552075:48599425:1 gene:ENSG00000088002.11 transcript:ENST00000201586.6 gene_biotype:protein_coding transcript_biotype:protein_coding gene_symbol:SULT2B1 description:sulfotransferase family 2B member 1 [Source:HGNC Symbol;Acc:HGNC:11459]	FALSE	TRUE	17.2603	2	6	2	High	High	High	High	Phospho [S318(92.5); S348(91.9)]	11.7
High	ENSP00000450607.1	pep chromosome:GRCh38:12:56416363:56449426:-1 gene:ENSG00000111602.12 transcript:ENST00000553532.6 gene_biotype:protein_coding transcript_biotype:protein_coding gene_symbol:TIMELESS description:timeless circadian regulator [Source:HGNC Symbol;Acc:HGNC:11813]	FALSE	TRUE	2.31788	2	5	2	High	High	High	High	Phospho [S1121(100); S1173(100)]	18.8
High	ENSP00000370007.1	pep chromosome:GRCh38:X:12975658:12977081:1 gene:ENSG00000205542.11 transcript:ENST00000380633.1 gene_biotype:protein_coding transcript_biotype:protein_coding gene_symbol:TMSB4X description:thymosin beta 4 X-linked [Source:HGNC Symbol;Acc:HGNC:11881]	FALSE	TRUE	45.4545	5	6	5	High	High	High	High	Phospho [T23(99.7)]	9.95
High	ENSP00000382688.2	pep chromosome:GRCh38:12:280057:389320:-1 gene:ENSG00000073614.13 transcript:ENST00000399788.7 gene_biotype:protein_coding transcript_biotype:protein_coding gene_symbol:KDM5A description:lysine demethylase 5A [Source:HGNC Symbol;Acc:HGNC:9886]	FALSE	TRUE	2.13018	3	3	3	High	High	High	High	Phospho [S1111(100); S1488(100)]	11.04
High	ENSP00000303315.4	pep chromosome:GRCh38:19:12791486:12793315:1 gene:ENSG00000171223.6 transcript:ENST00000302754.6 gene_biotype:protein_coding transcript_biotype:protein_coding gene_symbol:JUNB description:JunB proto-oncogene, AP-1 transcription factor subunit [Source:HGNC Symbol;Acc:HGNC:6205]	FALSE	TRUE	5.18732	2	3	2	High	High	High	High	Phospho [S251(100); T255(100); S259(100)]	10.79
High	ENSP00000475486.1	pep chromosome:GRCh38:7:4740859:4755051:1 gene:ENSG00000164916.11 transcript:ENST00000460979.2 gene_biotype:protein_coding transcript_biotype:protein_coding gene_symbol:FOXK1 description:forkhead box K1 [Source:HGNC Symbol;Acc:HGNC:23480]	FALSE	TRUE	33.0275	2	4	1	High	High	High	High	Phospho [S20(100); S106(100)]	11.91
High	ENSP00000305918.6	pep chromosome:GRCh38:9:134030305:134068026:-1 gene:ENSG00000169925.17 transcript:ENST00000303407.12 gene_biotype:protein_coding transcript_biotype:protein_coding gene_symbol:BRD3 description:bromodomain containing 3 [Source:HGNC Symbol;Acc:HGNC:1104]	FALSE	TRUE	4.54545	2	9	2	High	High	High	High	Phospho [S263(99.9); S563(98.7)]	15.24
High	ENSP00000357177.3	pep chromosome:GRCh38:1:156934840:157045370:-1 gene:ENSG00000132694.18 transcript:ENST00000368194.7 gene_biotype:protein_coding transcript_biotype:protein_coding gene_symbol:ARHGEF11 description:Rho guanine nucleotide exchange factor 11 [Source:HGNC Symbol;Acc:HGNC:14580]	FALSE	TRUE	4.28937	4	8	4	High	High	High	High	Phospho [S295(95.9); S675(100); S1335(100); S1559(99.9)]	13.33
High	ENSP00000307940.5	pep chromosome:GRCh38:19:3976056:3985463:-1 gene:ENSG00000167658.16 transcript:ENST00000309311.7 gene_biotype:protein_coding transcript_biotype:protein_coding gene_symbol:EEF2 description:eukaryotic translation elongation factor 2 [Source:HGNC Symbol;Acc:HGNC:3214]	FALSE	TRUE	6.41026	5	9	5	High	High	High	High	Phospho [Y434(93.3)]	13.18
High	ENSP00000429082.1	pep chromosome:GRCh38:8:140658402:140921219:-1 gene:ENSG00000169398.19 transcript:ENST00000517887.5 gene_biotype:protein_coding transcript_biotype:protein_coding gene_symbol:PTK2 description:protein tyrosine kinase 2 [Source:HGNC Symbol;Acc:HGNC:9611]	FALSE	TRUE	6.93431	3	5	3	High	High	High	High	Phospho [S766(97.9); S887(100); S954(100)]	13.83
High	ENSP00000357866.1	pep chromosome:GRCh38:1:151292479:151327419:-1 gene:ENSG00000143393.16 transcript:ENST00000368872.5 gene_biotype:protein_coding transcript_biotype:protein_coding gene_symbol:PI4KB description:phosphatidylinositol 4-kinase beta [Source:HGNC Symbol;Acc:HGNC:8984]	FALSE	TRUE	8.86392	4	7	4	High	High	High	High	Phospho [S275(93.4); S413(100); S781(100)]	20.76
High	ENSP00000425956.2	pep chromosome:GRCh38:17:80260866:80395312:1 gene:ENSG00000173821.19 transcript:ENST00000508628.6 gene_biotype:protein_coding transcript_biotype:protein_coding gene_symbol:RNF213 description:ring finger protein 213 [Source:HGNC Symbol;Acc:HGNC:14539]	FALSE	TRUE	0.684932	2	4	2	High	High	High	High	Phospho [S1177(99); S1307(100)]	16.5
High	ENSP00000345848.4	pep chromosome:GRCh38:9:97983341:98015943:1 gene:ENSG00000136938.9 transcript:ENST00000339399.5 gene_biotype:protein_coding transcript_biotype:protein_coding gene_symbol:ANP32B description:acidic nuclear phosphoprotein 32 family member B [Source:HGNC Symbol;Acc:HGNC:16677]	FALSE	TRUE	4.38247	3	23	3	High	High	High	High	Phospho [T244(100)]	13.98
High	ENSP00000356607.3	pep chromosome:GRCh38:1:178725165:178920103:1 gene:ENSG00000116191.17 transcript:ENST00000367635.7 gene_biotype:protein_coding transcript_biotype:protein_coding gene_symbol:RALGPS2 description:Ral GEF with PH domain and SH3 binding motif 2 [Source:HGNC Symbol;Acc:HGNC:30279]	FALSE	TRUE	3.60206	2	3	2	High	High	High	High	Phospho [S308(94.2)]	10.01
High	ENSP00000305675.4	pep chromosome:GRCh38:2:191834310:191847088:-1 gene:ENSG00000168497.5 transcript:ENST00000304141.5 gene_biotype:protein_coding transcript_biotype:protein_coding gene_symbol:CAVIN2 description:caveolae associated protein 2 [Source:HGNC Symbol;Acc:HGNC:10690]	FALSE	TRUE	8.70588	2	4	2	High	High	High	High	Phospho [S27(99.9); S293(91.6)]	12.19
High	ENSP00000369897.4	pep chromosome:GRCh38:11:3000922:3057437:-1 gene:ENSG00000110619.17 transcript:ENST00000380525.8 gene_biotype:protein_coding transcript_biotype:protein_coding gene_symbol:CARS description:cysteinyl-tRNA synthetase [Source:HGNC Symbol;Acc:HGNC:1493]	FALSE	TRUE	3.61011	2	3	2	High	High	High	High	Phospho [S102(100); S390(100)]	10.85
High	ENSP00000500171.1	pep chromosome:GRCh38:CHR_HG2246_HG2248_HG2276_PATCH:132136594:132144319:-1 gene:ENSG00000288503.1 transcript:ENST00000673535.1 gene_biotype:protein_coding transcript_biotype:protein_coding gene_symbol:DDX51 description:DEAD-box helicase 51 [Source:HGNC Symbol;Acc:HGNC:20082]	FALSE	TRUE	8.70871	2	3	2	High	High	High	High	Phospho [S83(100); S103(100)]	10.42
High	ENSP00000495631.1	pep chromosome:GRCh38:13:111115453:111305727:1 gene:ENSG00000102606.18 transcript:ENST00000646102.1 gene_biotype:protein_coding transcript_biotype:protein_coding gene_symbol:ARHGEF7 description:Rho guanine nucleotide exchange factor 7 [Source:HGNC Symbol;Acc:HGNC:15607]	FALSE	TRUE	3.24826	3	5	3	High	High	High	High	Phospho [S228(100); S497(100); S673(99.9)]	7.2
High	ENSP00000265070.6	pep chromosome:GRCh38:5:32124716:32174319:-1 gene:ENSG00000113384.14 transcript:ENST00000265070.7 gene_biotype:protein_coding transcript_biotype:protein_coding gene_symbol:GOLPH3 description:golgi phosphoprotein 3 [Source:HGNC Symbol;Acc:HGNC:15452]	FALSE	TRUE	5.36913	1	6	1	High	High	High	High	Phospho [S35(100); S36(100)]	15.72
High	ENSP00000338173.5	pep chromosome:GRCh38:2:20248691:20327383:-1 gene:ENSG00000055917.15 transcript:ENST00000338086.9 gene_biotype:protein_coding transcript_biotype:protein_coding gene_symbol:PUM2 description:pumilio RNA binding family member 2 [Source:HGNC Symbol;Acc:HGNC:14958]	FALSE	TRUE	4.13534	4	8	4	High	High	High	High	Phospho [S102(84.6); S136(100); S182(95.9)]	19.1
High	ENSP00000304895.4	pep chromosome:GRCh38:2:226731317:226799759:-1 gene:ENSG00000169047.5 transcript:ENST00000305123.5 gene_biotype:protein_coding transcript_biotype:protein_coding gene_symbol:IRS1 description:insulin receptor substrate 1 [Source:HGNC Symbol;Acc:HGNC:6125]	FALSE	TRUE	4.34783	3	7	3	High	High	High	High	Phospho [S348(98.2); S1100(83.2)]	10.88
High	ENSP00000482335.1	pep chromosome:GRCh38:6:136342281:136526213:-1 gene:ENSG00000135525.18 transcript:ENST00000617204.4 gene_biotype:protein_coding transcript_biotype:protein_coding gene_symbol:MAP7 description:microtubule associated protein 7 [Source:HGNC Symbol;Acc:HGNC:6869]	FALSE	TRUE	5.13479	3	5	3	High	High	High	High	Phospho [S231(100); S345(99.8); S395(100)]	8.23
High	ENSP00000306473.3	pep chromosome:GRCh38:16:46578591:46621379:-1 gene:ENSG00000171241.9 transcript:ENST00000303383.8 gene_biotype:protein_coding transcript_biotype:protein_coding gene_symbol:SHCBP1 description:SHC binding and spindle associated 1 [Source:HGNC Symbol;Acc:HGNC:29547]	FALSE	TRUE	2.23214	1	6	1	High	High	High	High	Phospho [S44(100)]	16.36
High	ENSP00000376989.1	pep chromosome:GRCh38:7:127370043:127392691:-1 gene:ENSG00000048405.10 transcript:ENST00000393313.5 gene_biotype:protein_coding transcript_biotype:protein_coding gene_symbol:ZNF800 description:zinc finger protein 800 [Source:HGNC Symbol;Acc:HGNC:27267]	FALSE	TRUE	3.46386	2	3	2	High	High	High	High	Phospho [S462(94.4); S647(100)]	9.74
High	ENSP00000323858.7	pep chromosome:GRCh38:12:113157174:113185479:-1 gene:ENSG00000123064.12 transcript:ENST00000314045.11 gene_biotype:protein_coding transcript_biotype:protein_coding gene_symbol:DDX54 description:DEAD-box helicase 54 [Source:HGNC Symbol;Acc:HGNC:20084]	FALSE	TRUE	1.81406	2	8	2	High	High	High	High	Phospho [S782(100)]	21.24
High	ENSP00000381693.2	pep chromosome:GRCh38:10:73785624:73801797:1 gene:ENSG00000214655.10 transcript:ENST00000398706.6 gene_biotype:protein_coding transcript_biotype:protein_coding gene_symbol:ZSWIM8 description:zinc finger SWIM-type containing 8 [Source:HGNC Symbol;Acc:HGNC:23528]	FALSE	TRUE	1.68295	3	3	3	High	High	High	High	Phospho [S53(92.1); S567(100)]	11.95
High	ENSP00000381064.3	pep chromosome:GRCh38:8:19817416:19852067:1 gene:ENSG00000104613.12 transcript:ENST00000397977.8 gene_biotype:protein_coding transcript_biotype:protein_coding gene_symbol:INTS10 description:integrator complex subunit 10 [Source:HGNC Symbol;Acc:HGNC:25548]	FALSE	TRUE	4.92958	2	6	2	High	High	High	High	Phospho [S231(99.4); S382(94.9)]	13.07
High	ENSP00000392065.2	pep chromosome:GRCh38:6:138903493:138988257:-1 gene:ENSG00000135597.18 transcript:ENST00000450536.6 gene_biotype:protein_coding transcript_biotype:protein_coding gene_symbol:REPS1 description:RALBP1 associated Eps domain containing 1 [Source:HGNC Symbol;Acc:HGNC:15578]	FALSE	TRUE	9.67337	5	10	5	High	High	High	High	Phospho [S162(100); S170(99.3); S482(88.3); S709(100)]	4.74
High	ENSP00000294383.5	pep chromosome:GRCh38:1:55066359:55215364:-1 gene:ENSG00000162402.14 transcript:ENST00000294383.7 gene_biotype:protein_coding transcript_biotype:protein_coding gene_symbol:USP24 description:ubiquitin specific peptidase 24 [Source:HGNC Symbol;Acc:HGNC:12623]	FALSE	TRUE	2.06107	5	6	4	High	High	High	High	Phospho [S1141(99.6); S1943(100); S2047(100); T2565(100)]	9.04
High	ENSP00000215957.6	pep chromosome:GRCh38:22:37906297:37942822:1 gene:ENSG00000100139.13 transcript:ENST00000215957.10 gene_biotype:protein_coding transcript_biotype:protein_coding gene_symbol:MICALL1 description:MICAL like 1 [Source:HGNC Symbol;Acc:HGNC:29804]	FALSE	TRUE	4.75087	3	6	3	High	High	High	High	Phospho [S578(100); S621(99.1); S640(100)]	11.44
High	ENSP00000229922.2	pep chromosome:GRCh38:6:17393595:17557780:1 gene:ENSG00000112186.12 transcript:ENST00000229922.7 gene_biotype:protein_coding transcript_biotype:protein_coding gene_symbol:CAP2 description:cyclase associated actin cytoskeleton regulatory protein 2 [Source:HGNC Symbol;Acc:HGNC:20039]	FALSE	TRUE	4.40252	2	8	2	High	High	High	High	Phospho [S301(99.5); S309(99.9)]	11.36
High	ENSP00000369500.3	pep chromosome:GRCh38:X:16719612:16765340:1 gene:ENSG00000169895.6 transcript:ENST00000380155.4 gene_biotype:protein_coding transcript_biotype:protein_coding gene_symbol:SYAP1 description:synapse associated protein 1 [Source:HGNC Symbol;Acc:HGNC:16273]	FALSE	TRUE	5.68182	2	6	2	High	High	High	High	Phospho [T248(100)]	6.5
High	ENSP00000321646.9	pep chromosome:GRCh38:3:98797783:98901326:-1 gene:ENSG00000057019.16 transcript:ENST00000326857.9 gene_biotype:protein_coding transcript_biotype:protein_coding gene_symbol:DCBLD2 description:discoidin, CUB and LCCL domain containing 2 [Source:HGNC Symbol;Acc:HGNC:24627]	FALSE	TRUE	1.90114	1	6	1	High	High	High	High	Phospho [S738(94.4)]	5.79
High	ENSP00000300086.4	pep chromosome:GRCh38:16:75647773:75657432:1 gene:ENSG00000166848.7 transcript:ENST00000300086.5 gene_biotype:protein_coding transcript_biotype:protein_coding gene_symbol:TERF2IP description:TERF2 interacting protein [Source:HGNC Symbol;Acc:HGNC:19246]	FALSE	TRUE	3.50877	1	5	1	High	High	High	High	Phospho [S203(100)]	7.92
High	ENSP00000359042.4	pep chromosome:GRCh38:1:108692310:108702928:1 gene:ENSG00000134186.12 transcript:ENST00000370025.9 gene_biotype:protein_coding transcript_biotype:protein_coding gene_symbol:PRPF38B description:pre-mRNA processing factor 38B [Source:HGNC Symbol;Acc:HGNC:25512]	FALSE	TRUE	4.21245	3	11	2	High	High	High	High	Phospho [S260(100); S262(100); S266(100); S268(100); S529(96.6)]	20.76
High	ENSP00000262887.4	pep chromosome:GRCh38:19:43543040:43576006:-1 gene:ENSG00000073050.11 transcript:ENST00000262887.9 gene_biotype:protein_coding transcript_biotype:protein_coding gene_symbol:XRCC1 description:X-ray repair cross complementing 1 [Source:HGNC Symbol;Acc:HGNC:12828]	FALSE	TRUE	8.37283	4	9	4	High	High	High	High	Phospho [S241(100); S447(92.7)]	6.79
High	ENSP00000343325.4	pep chromosome:GRCh38:19:14440260:14471866:1 gene:ENSG00000123143.12 transcript:ENST00000342216.8 gene_biotype:protein_coding transcript_biotype:protein_coding gene_symbol:PKN1 description:protein kinase N1 [Source:HGNC Symbol;Acc:HGNC:9405]	FALSE	TRUE	8.33333	4	8	4	High	High	High	High	Phospho [S378(90.9); S568(99); S922(99.5)]	12
High	ENSP00000366284.1	pep chromosome:GRCh38:1:10232250:10381597:1 gene:ENSG00000054523.17 transcript:ENST00000377081.5 gene_biotype:protein_coding transcript_biotype:protein_coding gene_symbol:KIF1B description:kinesin family member 1B [Source:HGNC Symbol;Acc:HGNC:16636]	FALSE	TRUE	3.18157	4	7	4	High	High	High	High	Phospho [S1054(90.8); S1487(100); S1659(92.6)]	15.82
High	ENSP00000247225.6	pep chromosome:GRCh38:14:63684216:63728065:-1 gene:ENSG00000126821.8 transcript:ENST00000247225.7 gene_biotype:protein_coding transcript_biotype:protein_coding gene_symbol:SGPP1 description:sphingosine-1-phosphate phosphatase 1 [Source:HGNC Symbol;Acc:HGNC:17720]	FALSE	TRUE	2.94785	2	6	2	High	High	High	High	Phospho [S112(99.6)]	17.15
High	ENSP00000320188.3	pep chromosome:GRCh38:19:55576774:55580848:-1 gene:ENSG00000218891.5 transcript:ENST00000325421.7 gene_biotype:protein_coding transcript_biotype:protein_coding gene_symbol:ZNF579 description:zinc finger protein 579 [Source:HGNC Symbol;Acc:HGNC:26646]	FALSE	TRUE	4.09253	1	4	1	High	High	High	High	Phospho [S483(93.1)]	8.05
High	ENSP00000257604.5	pep chromosome:GRCh38:12:112125545:112153603:1 gene:ENSG00000135148.12 transcript:ENST00000257604.9 gene_biotype:protein_coding transcript_biotype:protein_coding gene_symbol:TRAFD1 description:TRAF-type zinc finger domain containing 1 [Source:HGNC Symbol;Acc:HGNC:24808]	FALSE	TRUE	4.63918	2	8	2	High	High	High	High	Phospho [S415(100)]	13.54
High	ENSP00000309474.6	pep chromosome:GRCh38:2:231056867:231172827:1 gene:ENSG00000173692.13 transcript:ENST00000308696.11 gene_biotype:protein_coding transcript_biotype:protein_coding gene_symbol:PSMD1 description:proteasome 26S subunit, non-ATPase 1 [Source:HGNC Symbol;Acc:HGNC:9554]	FALSE	TRUE	5.45645	3	4	3	High	High	High	High	Phospho [T273(91.7)]	13.5
High	ENSP00000498100.1	pep chromosome:GRCh38:14:99792648:99942014:1 gene:ENSG00000066629.17 transcript:ENST00000649352.1 gene_biotype:protein_coding transcript_biotype:protein_coding gene_symbol:EML1 description:EMAP like 1 [Source:HGNC Symbol;Acc:HGNC:3330]	FALSE	TRUE	4.28571	3	9	3	High	High	High	High	Phospho [S119(93.7); S165(100); S185(90.3)]	9.98
High	ENSP00000270583.4	pep chromosome:GRCh38:16:87707812:87765986:-1 gene:ENSG00000104731.14 transcript:ENST00000270583.10 gene_biotype:protein_coding transcript_biotype:protein_coding gene_symbol:KLHDC4 description:kelch domain containing 4 [Source:HGNC Symbol;Acc:HGNC:25272]	FALSE	TRUE	6.34615	2	4	2	High	High	High	High	Phospho [S413(100); S418(100)]	12.4
High	ENSP00000349573.4	pep chromosome:GRCh38:10:43385617:43407819:-1 gene:ENSG00000169813.16 transcript:ENST00000357065.8 gene_biotype:protein_coding transcript_biotype:protein_coding gene_symbol:HNRNPF description:heterogeneous nuclear ribonucleoprotein F [Source:HGNC Symbol;Acc:HGNC:5039]	FALSE	TRUE	8.19277	2	3	1	High	High	High	High	Phospho [S310(100)]	11.43
High	ENSP00000334808.4	pep chromosome:GRCh38:21:29024651:29054488:1 gene:ENSG00000156256.15 transcript:ENST00000334352.8 gene_biotype:protein_coding transcript_biotype:protein_coding gene_symbol:USP16 description:ubiquitin specific peptidase 16 [Source:HGNC Symbol;Acc:HGNC:12614]	FALSE	TRUE	2.55164	2	6	2	High	High	High	High	Phospho [S415(100)]	13.64
High	ENSP00000363654.3	pep chromosome:GRCh38:9:109780309:110172512:1 gene:ENSG00000157654.18 transcript:ENST00000374530.7 gene_biotype:protein_coding transcript_biotype:protein_coding gene_symbol:PALM2-AKAP2 description:PALM2-AKAP2 fusion [Source:HGNC Symbol;Acc:HGNC:33529]	FALSE	TRUE	5.43971	3	6	3	High	High	High	High	Phospho [S385(81.4); S951(100); T1012(76.9)]	9.31
High	ENSP00000304051.3	pep chromosome:GRCh38:8:124474738:124487914:1 gene:ENSG00000170881.4 transcript:ENST00000303545.3 gene_biotype:protein_coding transcript_biotype:protein_coding gene_symbol:RNF139 description:ring finger protein 139 [Source:HGNC Symbol;Acc:HGNC:17023]	FALSE	TRUE	3.61446	1	3	1	High	High	High	High	Phospho [S625(100); S634(100); T635(100)]	18.83
High	ENSP00000479068.1	pep chromosome:GRCh38:8:8317736:8381747:-1 gene:ENSG00000275342.5 transcript:ENST00000622241.1 gene_biotype:protein_coding transcript_biotype:protein_coding gene_symbol:PRAG1 description:PEAK1 related, kinase-activating pseudokinase 1 [Source:HGNC Symbol;Acc:HGNC:25438]	FALSE	TRUE	4.26743	4	6	4	High	High	High	High	Phospho [S148(91.8); S234(100); S285(99.7); S782(99.4)]	11.8
High	ENSP00000331907.4	pep chromosome:GRCh38:19:47349315:47382704:1 gene:ENSG00000134815.19 transcript:ENST00000328771.9 gene_biotype:protein_coding transcript_biotype:protein_coding gene_symbol:DHX34 description:DExH-box helicase 34 [Source:HGNC Symbol;Acc:HGNC:16719]	FALSE	TRUE	1.22485	1	3	1	High	High	High	High	Phospho [S749(100); S750(100)]	11.2
High	ENSP00000420195.1	pep chromosome:GRCh38:1:23964347:23980327:-1 gene:ENSG00000188529.15 transcript:ENST00000492112.3 gene_biotype:protein_coding transcript_biotype:protein_coding gene_symbol:SRSF10 description:serine and arginine rich splicing factor 10 [Source:HGNC Symbol;Acc:HGNC:16713]	FALSE	TRUE	9.16031	4	8	1	High	High	High	High	Phospho [S131(98.3); S133(100); S141(99.8); S143(95.9); S160(99.7)]	4.92
High	ENSP00000356579.3	pep chromosome:GRCh38:1:179954810:180114875:1 gene:ENSG00000135837.16 transcript:ENST00000367607.8 gene_biotype:protein_coding transcript_biotype:protein_coding gene_symbol:CEP350 description:centrosomal protein 350 [Source:HGNC Symbol;Acc:HGNC:24238]	FALSE	TRUE	1.82868	5	5	4	High	High	High	High	Phospho [S1648(100); S1805(92.9); T2462(90.1)]	8.45
High	ENSP00000330188.6	pep chromosome:GRCh38:12:122503454:122526936:-1 gene:ENSG00000111011.18 transcript:ENST00000331738.12 gene_biotype:protein_coding transcript_biotype:protein_coding gene_symbol:RSRC2 description:arginine and serine rich coiled-coil 2 [Source:HGNC Symbol;Acc:HGNC:30559]	FALSE	TRUE	5.52995	3	11	3	High	High	High	High	Phospho [S32(100)]	16.23
High	ENSP00000494292.1	pep chromosome:GRCh38:7:100679507:100693968:-1 gene:ENSG00000146830.10 transcript:ENST00000646601.1 gene_biotype:protein_coding transcript_biotype:protein_coding gene_symbol:GIGYF1 description:GRB10 interacting GYF protein 1 [Source:HGNC Symbol;Acc:HGNC:9126]	FALSE	TRUE	5.31401	3	7	3	High	High	High	High	Phospho [S230(100); S538(100)]	14.1
High	ENSP00000246194.3	pep chromosome:GRCh38:20:33993911:34084884:1 gene:ENSG00000125970.12 transcript:ENST00000246194.8 gene_biotype:protein_coding transcript_biotype:protein_coding gene_symbol:RALY description:RALY heterogeneous nuclear ribonucleoprotein [Source:HGNC Symbol;Acc:HGNC:15921]	FALSE	TRUE	13.7255	4	7	4	High	High	High	High	Phospho [S135(100); S288(86.8)]	12.31
High	ENSP00000473469.1	pep chromosome:GRCh38:9:19230435:19372598:1 gene:ENSG00000137145.20 transcript:ENST00000434457.6 gene_biotype:protein_coding transcript_biotype:protein_coding gene_symbol:DENND4C description:DENN domain containing 4C [Source:HGNC Symbol;Acc:HGNC:26079]	FALSE	TRUE	3.21757	3	5	3	High	High	High	High	Phospho [T1146(90.8); T1265(99.8); S1327(90)]	6.72
High	ENSP00000285814.4	pep chromosome:GRCh38:2:121726945:121736875:-1 gene:ENSG00000155438.12 transcript:ENST00000285814.9 gene_biotype:protein_coding transcript_biotype:protein_coding gene_symbol:NIFK description:nucleolar protein interacting with the FHA domain of MKI67 [Source:HGNC Symbol;Acc:HGNC:17838]	FALSE	TRUE	9.55631	3	5	3	High	High	High	High	Phospho [T223(100); T238(99.2)]	12.18
High	ENSP00000368244.4	pep chromosome:GRCh38:20:5911510:5925353:1 gene:ENSG00000089199.10 transcript:ENST00000378961.9 gene_biotype:protein_coding transcript_biotype:protein_coding gene_symbol:CHGB description:chromogranin B [Source:HGNC Symbol;Acc:HGNC:1930]	FALSE	TRUE	7.38552	4	4	4	High	High	High	High	Phospho [S225(100); S259(100); S377(100)]	10.23
High	ENSP00000338727.4	pep chromosome:GRCh38:3:37052626:37174582:-1 gene:ENSG00000093167.18 transcript:ENST00000336686.9 gene_biotype:protein_coding transcript_biotype:protein_coding gene_symbol:LRRFIP2 description:LRR binding FLII interacting protein 2 [Source:HGNC Symbol;Acc:HGNC:6703]	FALSE	TRUE	4.85437	2	4	2	High	High	High	High	Phospho [S320(89.8); S328(100)]	9.02
High	ENSP00000312671.4	pep chromosome:GRCh38:11:65576053:65592650:1 gene:ENSG00000173442.13 transcript:ENST00000309295.9 gene_biotype:protein_coding transcript_biotype:protein_coding gene_symbol:EHBP1L1 description:EH domain binding protein 1 like 1 [Source:HGNC Symbol;Acc:HGNC:30682]	FALSE	TRUE	3.47997	3	9	3	High	High	High	High	Phospho [S310(100); S1017(95.9)]	11.39
High	ENSP00000359839.3	pep chromosome:GRCh38:X:134373253:134428790:1 gene:ENSG00000156531.16 transcript:ENST00000370803.7 gene_biotype:protein_coding transcript_biotype:protein_coding gene_symbol:PHF6 description:PHD finger protein 6 [Source:HGNC Symbol;Acc:HGNC:18145]	FALSE	TRUE	10.6849	3	8	3	High	High	High	High	Phospho [S155(97.7); S199(100); S204(99.8)]	10.2
High	ENSP00000238616.5	pep chromosome:GRCh38:14:75079353:75127048:-1 gene:ENSG00000119638.13 transcript:ENST00000238616.10 gene_biotype:protein_coding transcript_biotype:protein_coding gene_symbol:NEK9 description:NIMA related kinase 9 [Source:HGNC Symbol;Acc:HGNC:18591]	FALSE	TRUE	6.33299	3	7	3	High	High	High	High	Phospho [S13(98.3); S16(98.3); T254(100); S869(90.7)]	13.38
High	ENSP00000427792.1	pep chromosome:GRCh38:8:95134076:95154918:1 gene:ENSG00000175895.4 transcript:ENST00000519516.1 gene_biotype:protein_coding transcript_biotype:protein_coding gene_symbol:PLEKHF2 description:pleckstrin homology and FYVE domain containing 2 [Source:HGNC Symbol;Acc:HGNC:20757]	FALSE	TRUE	6.82731	1	7	1	High	High	High	High	Phospho [S239(100)]	25.42
High	ENSP00000318262.6	pep chromosome:GRCh38:12:71839759:71923223:1 gene:ENSG00000121749.15 transcript:ENST00000319106.12 gene_biotype:protein_coding transcript_biotype:protein_coding gene_symbol:TBC1D15 description:TBC1 domain family member 15 [Source:HGNC Symbol;Acc:HGNC:25694]	FALSE	TRUE	5.13196	2	6	2	High	High	High	High	Phospho [S666(100)]	12.36
High	ENSP00000499895.1	pep chromosome:GRCh38:CHR_HG2121_PATCH:89643512:89819723:-1 gene:ENSG00000288121.1 transcript:ENST00000672983.1 gene_biotype:protein_coding transcript_biotype:protein_coding gene_symbol:MDN1 description:midasin AAA ATPase 1 [Source:HGNC Symbol;Acc:HGNC:18302]	FALSE	TRUE	0.339528	1	2	1	High	High	High	High	Phospho [S4538(100)]	8.63
High	ENSP00000386134.3	pep chromosome:GRCh38:14:23469703:23478173:1 gene:ENSG00000129460.16 transcript:ENST00000408901.8 gene_biotype:protein_coding transcript_biotype:protein_coding gene_symbol:NGDN description:neuroguidin [Source:HGNC Symbol;Acc:HGNC:20271]	FALSE	TRUE	6.66667	1	10	1	High	High	High	High	Phospho [S142(100); S143(100)]	34.37
High	ENSP00000198767.6	pep chromosome:GRCh38:16:15060022:15094317:-1 gene:ENSG00000085721.12 transcript:ENST00000198767.10 gene_biotype:protein_coding transcript_biotype:protein_coding gene_symbol:RRN3 description:RRN3 homolog, RNA polymerase I transcription factor [Source:HGNC Symbol;Acc:HGNC:30346]	FALSE	TRUE	8.60215	3	3	3	High	High	High	High	Phospho [S44(100); S170(100); S172(100); S633(90.7)]	9.1
High	ENSP00000329219.2	pep chromosome:GRCh38:17:45221885:45247318:1 gene:ENSG00000184922.14 transcript:ENST00000331495.8 gene_biotype:protein_coding transcript_biotype:protein_coding gene_symbol:FMNL1 description:formin like 1 [Source:HGNC Symbol;Acc:HGNC:1212]	FALSE	TRUE	3.18182	3	6	3	High	High	High	High	Phospho [S624(100); S1031(100)]	5.56
High	ENSP00000480836.1	pep chromosome:GRCh38:22:17638584:17730855:1 gene:ENSG00000099968.18 transcript:ENST00000618481.4 gene_biotype:protein_coding transcript_biotype:protein_coding gene_symbol:BCL2L13 description:BCL2 like 13 [Source:HGNC Symbol;Acc:HGNC:17164]	FALSE	TRUE	6.09037	2	5	2	High	High	High	High	Phospho [S395(90.2); S450(100)]	11.07
High	ENSP00000356448.3	pep chromosome:GRCh38:1:186311652:186375253:-1 gene:ENSG00000047410.14 transcript:ENST00000367478.9 gene_biotype:protein_coding transcript_biotype:protein_coding gene_symbol:TPR description:translocated promoter region, nuclear basket protein [Source:HGNC Symbol;Acc:HGNC:12017]	FALSE	TRUE	2.20059	3	4	3	High	High	High	High	Phospho [S379(100); S2037(90.1); S2073(100)]	10.46
High	ENSP00000229390.3	pep chromosome:GRCh38:12:120461672:120469748:-1 gene:ENSG00000111786.9 transcript:ENST00000229390.8 gene_biotype:protein_coding transcript_biotype:protein_coding gene_symbol:SRSF9 description:serine and arginine rich splicing factor 9 [Source:HGNC Symbol;Acc:HGNC:10791]	FALSE	TRUE	13.1222	3	9	3	High	High	High	High	Phospho [S204(100); S211(99.4)]	4.91
High	ENSP00000321703.4	pep chromosome:GRCh38:8:38787236:38853028:1 gene:ENSG00000147526.20 transcript:ENST00000317827.9 gene_biotype:protein_coding transcript_biotype:protein_coding gene_symbol:TACC1 description:transforming acidic coiled-coil containing protein 1 [Source:HGNC Symbol;Acc:HGNC:11522]	FALSE	TRUE	5.96273	2	5	1	High	High	High	High	Phospho [S44(100); S305(100)]	13.63
High	ENSP00000363667.1	pep chromosome:GRCh38:9:109375700:109498307:-1 gene:ENSG00000070159.14 transcript:ENST00000374541.4 gene_biotype:protein_coding transcript_biotype:protein_coding gene_symbol:PTPN3 description:protein tyrosine phosphatase non-receptor type 3 [Source:HGNC Symbol;Acc:HGNC:9655]	FALSE	TRUE	2.84775	2	4	2	High	High	High	High	Phospho [S359(90); S425(100)]	7.6
High	ENSP00000361635.1	pep chromosome:GRCh38:10:75210848:75231277:1 gene:ENSG00000165637.13 transcript:ENST00000313132.8 gene_biotype:protein_coding transcript_biotype:protein_coding gene_symbol:VDAC2 description:voltage dependent anion channel 2 [Source:HGNC Symbol;Acc:HGNC:12672]	FALSE	TRUE	4.53074	2	7	2	High	High	High	High	Phospho [S130(99.9)]	11.25
High	ENSP00000264720.3	pep chromosome:GRCh38:2:27325849:27357034:-1 gene:ENSG00000115207.13 transcript:ENST00000264720.7 gene_biotype:protein_coding transcript_biotype:protein_coding gene_symbol:GTF3C2 description:general transcription factor IIIC subunit 2 [Source:HGNC Symbol;Acc:HGNC:4665]	FALSE	TRUE	3.62239	3	9	3	High	High	High	High	Phospho [S167(95.4); S220(96); S892(89.5)]	7.99
High	ENSP00000284320.5	pep chromosome:GRCh38:3:100363431:100401089:-1 gene:ENSG00000154174.8 transcript:ENST00000284320.6 gene_biotype:protein_coding transcript_biotype:protein_coding gene_symbol:TOMM70 description:translocase of outer mitochondrial membrane 70 [Source:HGNC Symbol;Acc:HGNC:11985]	FALSE	TRUE	3.94737	1	2	1	High	High	High	High	Phospho [S91(100)]	8.99
High	ENSP00000377502.3	pep chromosome:GRCh38:3:111859796:111976247:1 gene:ENSG00000144824.21 transcript:ENST00000393925.7 gene_biotype:protein_coding transcript_biotype:protein_coding gene_symbol:PHLDB2 description:pleckstrin homology like domain family B member 2 [Source:HGNC Symbol;Acc:HGNC:29573]	FALSE	TRUE	4.94812	4	7	4	High	High	High	High	Phospho [S204(92.5); S334(100); S489(100)]	13.39
High	ENSP00000236925.4	pep chromosome:GRCh38:1:200739779:200860701:1 gene:ENSG00000118200.14 transcript:ENST00000236925.8 gene_biotype:protein_coding transcript_biotype:protein_coding gene_symbol:CAMSAP2 description:calmodulin regulated spectrin associated protein family member 2 [Source:HGNC Symbol;Acc:HGNC:29188]	FALSE	TRUE	4.16387	3	5	3	High	High	High	High	Phospho [S611(83.7); S862(84.9)]	13.44
High	ENSP00000322706.6	pep chromosome:GRCh38:5:43287470:43313412:-1 gene:ENSG00000112972.15 transcript:ENST00000325110.11 gene_biotype:protein_coding transcript_biotype:protein_coding gene_symbol:HMGCS1 description:3-hydroxy-3-methylglutaryl-CoA synthase 1 [Source:HGNC Symbol;Acc:HGNC:5007]	FALSE	TRUE	5.96154	2	3	2	High	High	High	High	Phospho [S495(100)]	10.18
High	ENSP00000371419.3	pep chromosome:GRCh38:13:24420931:24512778:-1 gene:ENSG00000102699.6 transcript:ENST00000381989.4 gene_biotype:protein_coding transcript_biotype:protein_coding gene_symbol:PARP4 description:poly(ADP-ribose) polymerase family member 4 [Source:HGNC Symbol;Acc:HGNC:271]	FALSE	TRUE	2.90023	3	5	3	High	High	High	High	Phospho [T101(100); S1335(100)]	8.83
High	ENSP00000384302.3	pep chromosome:GRCh38:2:28894667:28948219:1 gene:ENSG00000163811.12 transcript:ENST00000407426.8 gene_biotype:protein_coding transcript_biotype:protein_coding gene_symbol:WDR43 description:WD repeat domain 43 [Source:HGNC Symbol;Acc:HGNC:28945]	FALSE	TRUE	4.57903	4	6	4	High	High	High	High	Phospho [S77(100); S431(98.4); S590(94.5)]	1.93
High	ENSP00000377665.2	pep chromosome:GRCh38:9:125261832:125363329:1 gene:ENSG00000165219.22 transcript:ENST00000394105.6 gene_biotype:protein_coding transcript_biotype:protein_coding gene_symbol:GAPVD1 description:GTPase activating protein and VPS9 domains 1 [Source:HGNC Symbol;Acc:HGNC:23375]	FALSE	TRUE	4.16947	4	6	4	High	High	High	High	Phospho [S742(98.6); S746(81.4); S993(100)]	13
High	ENSP00000417229.1	pep chromosome:GRCh38:3:150546787:150586016:1 gene:ENSG00000144895.12 transcript:ENST00000460851.6 gene_biotype:protein_coding transcript_biotype:protein_coding gene_symbol:EIF2A description:eukaryotic translation initiation factor 2A [Source:HGNC Symbol;Acc:HGNC:3254]	FALSE	TRUE	3.07692	1	4	1	High	High	High	High	Phospho [S506(100)]	11.17
High	ENSP00000434311.1	pep chromosome:GRCh38:11:77618533:77637776:-1 gene:ENSG00000074201.9 transcript:ENST00000528364.1 gene_biotype:protein_coding transcript_biotype:protein_coding gene_symbol:CLNS1A description:chloride nucleotide-sensitive channel 1A [Source:HGNC Symbol;Acc:HGNC:2080]	FALSE	TRUE	11.8143	2	6	2	High	High	High	High	Phospho [S102(100)]	19.68
High	ENSP00000298310.5	pep chromosome:GRCh38:14:49782083:49852788:-1 gene:ENSG00000165525.18 transcript:ENST00000298310.10 gene_biotype:protein_coding transcript_biotype:protein_coding gene_symbol:NEMF description:nuclear export mediator factor [Source:HGNC Symbol;Acc:HGNC:10663]	FALSE	TRUE	3.99628	3	4	3	High	High	High	High	Phospho [S417(100); S831(100)]	11.79
High	ENSP00000016946.3	pep chromosome:GRCh38:2:109794305:109857705:1 gene:ENSG00000015568.13 transcript:ENST00000016946.8 gene_biotype:protein_coding transcript_biotype:protein_coding gene_symbol:RGPD5 description:RANBP2 like and GRIP domain containing 5 [Source:HGNC Symbol;Acc:HGNC:32418]	FALSE	TRUE	3.1728	5	10	1	High	High	High	High	Phospho [Y756(99.6); S757(99.6); Y763(100); S788(87); S1471(98.4); S1478(100); S1481(88.2); S1486(100); S1534(100)]	10.7
High	ENSP00000176763.5	pep chromosome:GRCh38:5:172042079:172188224:-1 gene:ENSG00000072786.13 transcript:ENST00000176763.10 gene_biotype:protein_coding transcript_biotype:protein_coding gene_symbol:STK10 description:serine/threonine kinase 10 [Source:HGNC Symbol;Acc:HGNC:11388]	FALSE	TRUE	1.54959	1	4	1	High	High	High	High	Phospho [S438(100)]	17.47
High	ENSP00000358789.4	pep chromosome:GRCh38:10:103594027:103855543:-1 gene:ENSG00000107957.16 transcript:ENST00000369774.8 gene_biotype:protein_coding transcript_biotype:protein_coding gene_symbol:SH3PXD2A description:SH3 and PX domains 2A [Source:HGNC Symbol;Acc:HGNC:23664]	FALSE	TRUE	1.50044	1	2	1	High	High	High	High	Phospho [S547(100)]	8.73
High	ENSP00000278568.4	pep chromosome:GRCh38:11:77322948:77474060:-1 gene:ENSG00000149269.9 transcript:ENST00000278568.8 gene_biotype:protein_coding transcript_biotype:protein_coding gene_symbol:PAK1 description:p21 (RAC1) activated kinase 1 [Source:HGNC Symbol;Acc:HGNC:8590]	FALSE	TRUE	10.4882	2	2	2	High	High	High	High	Phospho [S174(100); T230(99.4)]	10.35
High	ENSP00000404808.2	pep chromosome:GRCh38:12:49989164:50025400:-1 gene:ENSG00000161800.13 transcript:ENST00000454520.6 gene_biotype:protein_coding transcript_biotype:protein_coding gene_symbol:RACGAP1 description:Rac GTPase activating protein 1 [Source:HGNC Symbol;Acc:HGNC:9804]	FALSE	TRUE	7.43671	3	5	3	High	High	High	High	Phospho [S206(98.8); T342(100); T580(94.6)]	9.93
High	ENSP00000278572.6	pep chromosome:GRCh38:11:75399530:75405688:1 gene:ENSG00000149273.15 transcript:ENST00000278572.10 gene_biotype:protein_coding transcript_biotype:protein_coding gene_symbol:RPS3 description:ribosomal protein S3 [Source:HGNC Symbol;Acc:HGNC:10420]	FALSE	TRUE	5.01931	1	8	1	High	High	High	High	Phospho [T237(96)]	15.74
High	ENSP00000305422.3	pep chromosome:GRCh38:20:50190830:50192668:1 gene:ENSG00000172216.6 transcript:ENST00000303004.5 gene_biotype:protein_coding transcript_biotype:protein_coding gene_symbol:CEBPB description:CCAAT enhancer binding protein beta [Source:HGNC Symbol;Acc:HGNC:1834]	FALSE	TRUE	9.85507	1	6	1	High	High	High	High	Phospho [T235(98.5)]	8.4
High	ENSP00000358716.4	pep chromosome:GRCh38:1:111755901:111768000:1 gene:ENSG00000064703.12 transcript:ENST00000369702.5 gene_biotype:protein_coding transcript_biotype:protein_coding gene_symbol:DDX20 description:DEAD-box helicase 20 [Source:HGNC Symbol;Acc:HGNC:2743]	FALSE	TRUE	3.8835	2	5	2	High	High	High	High	Phospho [S677(87); S685(93.7); Y711(93.4)]	14.48
High	ENSP00000368314.3	pep chromosome:GRCh38:7:108147626:108456397:-1 gene:ENSG00000091129.20 transcript:ENST00000379028.7 gene_biotype:protein_coding transcript_biotype:protein_coding gene_symbol:NRCAM description:neuronal cell adhesion molecule [Source:HGNC Symbol;Acc:HGNC:7994]	FALSE	TRUE	3.98773	3	4	3	High	High	High	High	Phospho [S1226(91.5); S1238(100); T1240(100); S1242(100); S1295(100)]	10.76
High	ENSP00000410298.2	pep chromosome:GRCh38:10:73812501:73874591:-1 gene:ENSG00000148660.20 transcript:ENST00000423381.5 gene_biotype:protein_coding transcript_biotype:protein_coding gene_symbol:CAMK2G description:calcium/calmodulin dependent protein kinase II gamma [Source:HGNC Symbol;Acc:HGNC:1463]	FALSE	TRUE	4.30108	2	7	2	High	High	High	High	Phospho [T287(100); T387(95.2)]	12.4
High	ENSP00000355388.4	pep chromosome:GRCh38:13:19633659:19673441:1 gene:ENSG00000196199.14 transcript:ENST00000361479.10 gene_biotype:protein_coding transcript_biotype:protein_coding gene_symbol:MPHOSPH8 description:M-phase phosphoprotein 8 [Source:HGNC Symbol;Acc:HGNC:29810]	FALSE	TRUE	6.97674	4	7	4	High	High	High	High	Phospho [S51(100); T84(91.2); S149(95.3); S403(83.3)]	12.55
High	ENSP00000350667.4	pep chromosome:GRCh38:15:63042751:63071912:1 gene:ENSG00000140416.21 transcript:ENST00000357980.8 gene_biotype:protein_coding transcript_biotype:protein_coding gene_symbol:TPM1 description:tropomyosin 1 [Source:HGNC Symbol;Acc:HGNC:12010]	FALSE	TRUE	12.5767	4	4	1	Medium	Medium	Medium	Medium	Phospho [S294(100)]	10.04
High	ENSP00000349351.6	pep chromosome:GRCh38:9:92711363:92764833:-1 gene:ENSG00000185963.14 transcript:ENST00000356884.11 gene_biotype:protein_coding transcript_biotype:protein_coding gene_symbol:BICD2 description:BICD cargo adaptor 2 [Source:HGNC Symbol;Acc:HGNC:17208]	FALSE	TRUE	2.33918	4	7	4	High	High	High	High	Phospho [S582(100)]	16.05
High	ENSP00000332455.3	pep chromosome:GRCh38:17:68035735:68046854:1 gene:ENSG00000182481.9 transcript:ENST00000330459.8 gene_biotype:protein_coding transcript_biotype:protein_coding gene_symbol:KPNA2 description:karyopherin subunit alpha 2 [Source:HGNC Symbol;Acc:HGNC:6395]	FALSE	TRUE	4.7259	2	7	2	High	High	High	High	Phospho [S24(99.6); S62(99.6)]	17.14
High	ENSP00000354558.4	pep chromosome:GRCh38:1:11106535:11262551:-1 gene:ENSG00000198793.13 transcript:ENST00000361445.9 gene_biotype:protein_coding transcript_biotype:protein_coding gene_symbol:MTOR description:mechanistic target of rapamycin kinase [Source:HGNC Symbol;Acc:HGNC:3942]	FALSE	TRUE	0.941546	1	6	1	High	High	High	High	Phospho [S2448(92.1)]	10.95
High	ENSP00000350011.5	pep chromosome:GRCh38:7:996986:1138257:-1 gene:ENSG00000146540.15 transcript:ENST00000357429.10 gene_biotype:protein_coding transcript_biotype:protein_coding gene_symbol:C7orf50 description:chromosome 7 open reading frame 50 [Source:HGNC Symbol;Acc:HGNC:22421]	FALSE	TRUE	18.0412	2	7	2	High	High	High	High	Phospho [S59(100); S175(100)]	19.95
High	ENSP00000496327.1	pep chromosome:GRCh38:11:70272228:70385312:1 gene:ENSG00000131626.18 transcript:ENST00000644155.1 gene_biotype:protein_coding transcript_biotype:protein_coding gene_symbol:PPFIA1 description:PTPRF interacting protein alpha 1 [Source:HGNC Symbol;Acc:HGNC:9245]	FALSE	TRUE	3.92157	3	7	3	High	High	High	High	Phospho [S224(100); S226(99.7); S675(87); S733(92.9); S737(99.3)]	13.25
High	ENSP00000322775.3	pep chromosome:GRCh38:17:76470896:76501407:-1 gene:ENSG00000129667.12 transcript:ENST00000313080.8 gene_biotype:protein_coding transcript_biotype:protein_coding gene_symbol:RHBDF2 description:rhomboid 5 homolog 2 [Source:HGNC Symbol;Acc:HGNC:20788]	FALSE	TRUE	7.35981	3	3	3	High	High	High	High	Phospho [S177(97.2); S309(100); S325(80.7)]	11.71
High	ENSP00000377892.2	pep chromosome:GRCh38:14:69767093:69771973:1 gene:ENSG00000100650.16 transcript:ENST00000394366.6 gene_biotype:protein_coding transcript_biotype:protein_coding gene_symbol:SRSF5 description:serine and arginine rich splicing factor 5 [Source:HGNC Symbol;Acc:HGNC:10787]	FALSE	TRUE	5.88235	2	8	2	High	High	High	High	Phospho [S231(99.6); S233(100); S270(99.2)]	4.95
High	ENSP00000331057.5	pep chromosome:GRCh38:15:56918694:57288508:1 gene:ENSG00000140262.17 transcript:ENST00000333725.9 gene_biotype:protein_coding transcript_biotype:protein_coding gene_symbol:TCF12 description:transcription factor 12 [Source:HGNC Symbol;Acc:HGNC:11623]	FALSE	TRUE	5.52408	2	6	2	High	High	High	High	Phospho [S564(88.5); T584(85.5)]	10.8
High	ENSP00000472998.1	pep chromosome:GRCh38:19:49085451:49108604:1 gene:ENSG00000104852.15 transcript:ENST00000598441.6 gene_biotype:protein_coding transcript_biotype:protein_coding gene_symbol:SNRNP70 description:small nuclear ribonucleoprotein U1 subunit 70 [Source:HGNC Symbol;Acc:HGNC:11150]	FALSE	TRUE	8.69565	3	4	3	High	High	High	High	Phospho [S226(100); S268(100); S410(100)]	9.03
High	ENSP00000364550.3	pep chromosome:GRCh38:X:53192152:53225422:-1 gene:ENSG00000126012.11 transcript:ENST00000375401.7 gene_biotype:protein_coding transcript_biotype:protein_coding gene_symbol:KDM5C description:lysine demethylase 5C [Source:HGNC Symbol;Acc:HGNC:11114]	FALSE	TRUE	2.4359	3	6	3	High	High	High	High	Phospho [S301(100); S896(84.9)]	10.46
High	ENSP00000362846.4	pep chromosome:GRCh38:1:30932850:31065991:-1 gene:ENSG00000134644.15 transcript:ENST00000373741.8 gene_biotype:protein_coding transcript_biotype:protein_coding gene_symbol:PUM1 description:pumilio RNA binding family member 1 [Source:HGNC Symbol;Acc:HGNC:14957]	FALSE	TRUE	4.00327	3	5	1	High	High	High	High	Phospho [S265(89.9); S283(100); S745(99.7)]	11.68
High	ENSP00000377684.1	pep chromosome:GRCh38:17:40019097:40054092:-1 gene:ENSG00000008838.20 transcript:ENST00000394126.5 gene_biotype:protein_coding transcript_biotype:protein_coding gene_symbol:MED24 description:mediator complex subunit 24 [Source:HGNC Symbol;Acc:HGNC:22963]	FALSE	TRUE	1.77515	1	7	1	High	High	High	High	Phospho [S898(100)]	14.3
High	ENSP00000240123.7	pep chromosome:GRCh38:8:22551695:22575788:1 gene:ENSG00000120896.13 transcript:ENST00000240123.11 gene_biotype:protein_coding transcript_biotype:protein_coding gene_symbol:SORBS3 description:sorbin and SH3 domain containing 3 [Source:HGNC Symbol;Acc:HGNC:30907]	FALSE	TRUE	3.27869	2	7	2	High	High	High	High	Phospho [S530(94.6); S545(94.7)]	14.01
High	ENSP00000264709.3	pep chromosome:GRCh38:2:25227855:25342590:-1 gene:ENSG00000119772.16 transcript:ENST00000264709.7 gene_biotype:protein_coding transcript_biotype:protein_coding gene_symbol:DNMT3A description:DNA methyltransferase 3 alpha [Source:HGNC Symbol;Acc:HGNC:2978]	FALSE	TRUE	1.64474	1	2	1	High	High	High	High	Phospho [S105(100)]	7.95
High	ENSP00000341805.4	pep chromosome:GRCh38:6:169703902:169724500:-1 gene:ENSG00000130024.15 transcript:ENST00000339209.9 gene_biotype:protein_coding transcript_biotype:protein_coding gene_symbol:PHF10 description:PHD finger protein 10 [Source:HGNC Symbol;Acc:HGNC:18250]	FALSE	TRUE	10.0402	3	4	3	High	High	High	High	Phospho [S36(100); Y269(95); S327(100)]	9.97
High	ENSP00000264485.5	pep chromosome:GRCh38:4:71187259:71572083:1 gene:ENSG00000080493.17 transcript:ENST00000264485.11 gene_biotype:protein_coding transcript_biotype:protein_coding gene_symbol:SLC4A4 description:solute carrier family 4 member 4 [Source:HGNC Symbol;Acc:HGNC:11030]	FALSE	TRUE	2.40964	2	3	2	High	High	High	High	Phospho [S1029(100); S1069(99.3)]	9.59
High	ENSP00000388464.2	pep chromosome:GRCh38:7:73302516:73308826:-1 gene:ENSG00000130305.17 transcript:ENST00000438747.7 gene_biotype:protein_coding transcript_biotype:protein_coding gene_symbol:NSUN5 description:NOP2/Sun RNA methyltransferase 5 [Source:HGNC Symbol;Acc:HGNC:16385]	FALSE	TRUE	5.36481	2	3	2	High	High	High	High	Phospho [S327(100); T462(100)]	9.59
High	ENSP00000420150.1	pep chromosome:GRCh38:3:158105855:158544522:1 gene:ENSG00000174891.13 transcript:ENST00000480820.5 gene_biotype:protein_coding transcript_biotype:protein_coding gene_symbol:RSRC1 description:arginine and serine rich coiled-coil 1 [Source:HGNC Symbol;Acc:HGNC:24152]	FALSE	TRUE	2.99401	2	10	2	High	High	High	High	Phospho [T8(88.6)]	12.99
High	ENSP00000484525.1	pep chromosome:GRCh38:18:79679801:79756623:1 gene:ENSG00000060069.16 transcript:ENST00000613122.4 gene_biotype:protein_coding transcript_biotype:protein_coding gene_symbol:CTDP1 description:CTD phosphatase subunit 1 [Source:HGNC Symbol;Acc:HGNC:2498]	FALSE	TRUE	5.09886	4	5	4	High	High	High	High	Phospho [S395(100); S474(100); S740(100); S839(93.9)]	12.18
High	ENSP00000413625.1	pep chromosome:GRCh38:9:129887187:130043189:-1 gene:ENSG00000187239.17 transcript:ENST00000446176.7 gene_biotype:protein_coding transcript_biotype:protein_coding gene_symbol:FNBP1 description:formin binding protein 1 [Source:HGNC Symbol;Acc:HGNC:17069]	FALSE	TRUE	1.78282	1	4	1	High	High	High	High	Phospho [S296(100)]	8.57
High	ENSP00000419879.1	pep chromosome:GRCh38:20:5127008:5197887:1 gene:ENSG00000101290.14 transcript:ENST00000460006.6 gene_biotype:protein_coding transcript_biotype:protein_coding gene_symbol:CDS2 description:CDP-diacylglycerol synthase 2 [Source:HGNC Symbol;Acc:HGNC:1801]	FALSE	TRUE	6.96629	2	7	2	High	High	High	High	Phospho [S21(99.6); S33(100)]	17.25
High	ENSP00000302276.2	pep chromosome:GRCh38:17:45160700:45170040:1 gene:ENSG00000168517.10 transcript:ENST00000307275.7 gene_biotype:protein_coding transcript_biotype:protein_coding gene_symbol:HEXIM2 description:HEXIM P-TEFb complex subunit 2 [Source:HGNC Symbol;Acc:HGNC:28591]	FALSE	TRUE	12.5874	2	6	2	High	High	High	High	Phospho [S29(100)]	11.62
High	ENSP00000344446.4	pep chromosome:GRCh38:12:95076749:95217467:-1 gene:ENSG00000180263.14 transcript:ENST00000343958.9 gene_biotype:protein_coding transcript_biotype:protein_coding gene_symbol:FGD6 description:FYVE, RhoGEF and PH domain containing 6 [Source:HGNC Symbol;Acc:HGNC:21740]	FALSE	TRUE	2.86713	4	8	4	High	High	High	High	Phospho [S515(100); Y691(91.6); S721(100); S1293(100)]	16.89
High	ENSP00000352400.5	pep chromosome:GRCh38:9:131125586:131234663:1 gene:ENSG00000126883.17 transcript:ENST00000359428.10 gene_biotype:protein_coding transcript_biotype:protein_coding gene_symbol:NUP214 description:nucleoporin 214 [Source:HGNC Symbol;Acc:HGNC:8064]	FALSE	TRUE	2.67943	3	7	3	High	High	High	High	Phospho [T437(93.8); S678(100)]	10.75
High	ENSP00000344220.4	pep chromosome:GRCh38:16:2538021:2603188:1 gene:ENSG00000140992.19 transcript:ENST00000342085.9 gene_biotype:protein_coding transcript_biotype:protein_coding gene_symbol:PDPK1 description:3-phosphoinositide dependent protein kinase 1 [Source:HGNC Symbol;Acc:HGNC:8816]	FALSE	TRUE	3.41727	1	2	1	High	High	High	High	Phospho [S241(100)]	10.46
High	ENSP00000347959.4	pep chromosome:GRCh38:X:123610198:123733056:-1 gene:ENSG00000125676.20 transcript:ENST00000355725.8 gene_biotype:protein_coding transcript_biotype:protein_coding gene_symbol:THOC2 description:THO complex 2 [Source:HGNC Symbol;Acc:HGNC:19073]	FALSE	TRUE	2.95041	4	6	4	High	High	High	High	Phospho [T1288(99.3); T1443(91.8); S1514(97.4)]	9.99
High	ENSP00000347184.5	pep chromosome:GRCh38:4:3074681:3243960:1 gene:ENSG00000197386.12 transcript:ENST00000355072.10 gene_biotype:protein_coding transcript_biotype:protein_coding gene_symbol:HTT description:huntingtin [Source:HGNC Symbol;Acc:HGNC:4851]	FALSE	TRUE	1.52769	3	5	3	High	High	High	High	Phospho [S432(99.5); S640(100); S1874(89.2)]	13.66
High	ENSP00000335677.5	pep chromosome:GRCh38:17:82519732:82604602:1 gene:ENSG00000141568.21 transcript:ENST00000335255.10 gene_biotype:protein_coding transcript_biotype:protein_coding gene_symbol:FOXK2 description:forkhead box K2 [Source:HGNC Symbol;Acc:HGNC:6036]	FALSE	TRUE	4.24242	3	7	3	High	High	High	High	Phospho [S170(100); S398(100)]	11.93
High	ENSP00000402935.2	pep chromosome:GRCh38:3:17160557:17700020:-1 gene:ENSG00000131374.14 transcript:ENST00000446818.6 gene_biotype:protein_coding transcript_biotype:protein_coding gene_symbol:TBC1D5 description:TBC1 domain family member 5 [Source:HGNC Symbol;Acc:HGNC:19166]	FALSE	TRUE	7.71114	3	6	3	High	High	High	High	Phospho [S561(97); S576(99)]	8.99
High	ENSP00000311360.2	pep chromosome:GRCh38:11:67391986:67398410:1 gene:ENSG00000172613.8 transcript:ENST00000307980.7 gene_biotype:protein_coding transcript_biotype:protein_coding gene_symbol:RAD9A description:RAD9 checkpoint clamp component A [Source:HGNC Symbol;Acc:HGNC:9827]	FALSE	TRUE	4.34783	1	2	1	High	High	High	High	Phospho [S387(100)]	7.29
High	ENSP00000455855.1	pep chromosome:GRCh38:16:8855065:8861713:-1 gene:ENSG00000153048.11 transcript:ENST00000567554.5 gene_biotype:protein_coding transcript_biotype:protein_coding gene_symbol:CARHSP1 description:calcium regulated heat stable protein 1 [Source:HGNC Symbol;Acc:HGNC:17150]	FALSE	TRUE	17.6871	3	12	3	High	High	High	High	Phospho [S30(100); S32(100); S41(100); S52(99.7)]	7.43
High	ENSP00000308179.4	pep chromosome:GRCh38:1:117929739:117966543:1 gene:ENSG00000065183.16 transcript:ENST00000349139.6 gene_biotype:protein_coding transcript_biotype:protein_coding gene_symbol:WDR3 description:WD repeat domain 3 [Source:HGNC Symbol;Acc:HGNC:12755]	FALSE	TRUE	2.96925	2	4	2	High	High	High	High	Phospho [S241(99.2)]	10.03
High	ENSP00000362659.2	pep chromosome:GRCh38:20:37384150:37406050:1 gene:ENSG00000197122.11 transcript:ENST00000373558.2 gene_biotype:protein_coding transcript_biotype:protein_coding gene_symbol:SRC description:SRC proto-oncogene, non-receptor tyrosine kinase [Source:HGNC Symbol;Acc:HGNC:11283]	FALSE	TRUE	8.85609	2	2	2	High	High	High	High	Phospho [S17(100); S75(94.7)]	9.45
High	ENSP00000481681.1	pep chromosome:GRCh38:CHR_HSCHR19LRC_LRC_T_CTG3_1:54141858:54156164:1 gene:ENSG00000273943.4 transcript:ENST00000613752.4 gene_biotype:protein_coding transcript_biotype:protein_coding gene_symbol:CNOT3 description:CCR4-NOT transcription complex subunit 3 [Source:HGNC Symbol;Acc:HGNC:7879]	FALSE	TRUE	7.70252	2	5	2	High	High	High	High	Phospho [S299(100)]	12.68
High	ENSP00000466214.1	pep chromosome:GRCh38:19:32581190:32587453:1 gene:ENSG00000105185.12 transcript:ENST00000590247.7 gene_biotype:protein_coding transcript_biotype:protein_coding gene_symbol:PDCD5 description:programmed cell death 5 [Source:HGNC Symbol;Acc:HGNC:8764]	FALSE	TRUE	8.8	2	13	2	High	High	High	High	Phospho [S119(100)]	26.14
High	ENSP00000401980.2	pep chromosome:GRCh38:20:3846834:3876118:1 gene:ENSG00000088888.18 transcript:ENST00000428216.4 gene_biotype:protein_coding transcript_biotype:protein_coding gene_symbol:MAVS description:mitochondrial antiviral signaling protein [Source:HGNC Symbol;Acc:HGNC:29233]	FALSE	TRUE	8.7037	2	3	2	High	High	High	High	Phospho [S152(99.6); S222(99.4)]	10.8
High	ENSP00000357459.4	pep chromosome:GRCh38:1:154582057:154608186:-1 gene:ENSG00000160710.17 transcript:ENST00000368474.9 gene_biotype:protein_coding transcript_biotype:protein_coding gene_symbol:ADAR description:adenosine deaminase RNA specific [Source:HGNC Symbol;Acc:HGNC:225]	FALSE	TRUE	2.61011	3	9	3	High	High	High	High	Phospho [T601(92.8); S825(99.6)]	6.48
High	ENSP00000276440.7	pep chromosome:GRCh38:8:25184689:25415711:1 gene:ENSG00000147459.18 transcript:ENST00000276440.12 gene_biotype:protein_coding transcript_biotype:protein_coding gene_symbol:DOCK5 description:dedicator of cytokinesis 5 [Source:HGNC Symbol;Acc:HGNC:23476]	FALSE	TRUE	2.51337	3	8	3	High	High	High	High	Phospho [S1834(99.7)]	15.68
High	ENSP00000336775.7	pep chromosome:GRCh38:15:99105080:99135593:1 gene:ENSG00000182253.15 transcript:ENST00000336292.11 gene_biotype:protein_coding transcript_biotype:protein_coding gene_symbol:SYNM description:synemin [Source:HGNC Symbol;Acc:HGNC:24466]	FALSE	TRUE	1.46965	1	2	1	High	High	High	High	Phospho [S1044(100); S1049(100)]	10.35
High	ENSP00000296302.7	pep chromosome:GRCh38:3:52547990:52679713:-1 gene:ENSG00000163939.18 transcript:ENST00000296302.11 gene_biotype:protein_coding transcript_biotype:protein_coding gene_symbol:PBRM1 description:polybromo 1 [Source:HGNC Symbol;Acc:HGNC:30064]	FALSE	TRUE	2.42747	2	6	2	High	High	High	High	Phospho [S178(91); S1453(93.3)]	13.91
High	ENSP00000369134.5	pep chromosome:GRCh38:X:19343893:19361705:1 gene:ENSG00000131828.14 transcript:ENST00000379806.9 gene_biotype:protein_coding transcript_biotype:protein_coding gene_symbol:PDHA1 description:pyruvate dehydrogenase E1 alpha 1 subunit [Source:HGNC Symbol;Acc:HGNC:8806]	FALSE	TRUE	5.37383	2	9	2	High	High	High	High	Phospho [S331(94.3)]	8.69
High	ENSP00000368698.2	pep chromosome:GRCh38:6:12012312:12164999:1 gene:ENSG00000095951.17 transcript:ENST00000379388.7 gene_biotype:protein_coding transcript_biotype:protein_coding gene_symbol:HIVEP1 description:human immunodeficiency virus type I enhancer binding protein 1 [Source:HGNC Symbol;Acc:HGNC:4920]	FALSE	TRUE	2.06034	4	6	4	High	High	High	High	Phospho [S130(93.6); S866(93.6); S1051(93.2)]	8.83
High	ENSP00000432149.1	pep chromosome:GRCh38:14:55580322:55684579:1 gene:ENSG00000126777.18 transcript:ENST00000459737.5 gene_biotype:protein_coding transcript_biotype:nonsense_mediated_decay gene_symbol:KTN1 description:kinectin 1 [Source:HGNC Symbol;Acc:HGNC:6467]	FALSE	TRUE	2.50553	2	3	2	High	High	High	High	Phospho [T153(98.1); S1313(99.9)]	10.81
High	ENSP00000388731.2	pep chromosome:GRCh38:2:181891730:181930738:1 gene:ENSG00000138434.17 transcript:ENST00000431877.7 gene_biotype:protein_coding transcript_biotype:protein_coding gene_symbol:ITPRID2 description:ITPR interacting domain containing 2 [Source:HGNC Symbol;Acc:HGNC:11319]	FALSE	TRUE	4.20969	4	4	4	High	High	High	High	Phospho [T87(100); S318(89.9); S668(100); S1053(97.1)]	10.25
High	ENSP00000268058.3	pep chromosome:GRCh38:15:73994716:74047827:1 gene:ENSG00000140464.20 transcript:ENST00000268058.8 gene_biotype:protein_coding transcript_biotype:protein_coding gene_symbol:PML description:promyelocytic leukemia [Source:HGNC Symbol;Acc:HGNC:9113]	FALSE	TRUE	3.85488	3	9	3	High	High	High	High	Phospho [S403(100); S505(99.7)]	9.16
High	ENSP00000375836.1	pep chromosome:GRCh38:2:241227264:241272886:-1 gene:ENSG00000115677.17 transcript:ENST00000391975.5 gene_biotype:protein_coding transcript_biotype:protein_coding gene_symbol:HDLBP description:high density lipoprotein binding protein [Source:HGNC Symbol;Acc:HGNC:4857]	FALSE	TRUE	1.89274	2	7	2	High	High	High	High	Phospho [S944(100)]	12.77
High	ENSP00000479636.1	pep chromosome:GRCh38:17:45108959:45132515:-1 gene:ENSG00000161714.12 transcript:ENST00000619929.5 gene_biotype:protein_coding transcript_biotype:protein_coding gene_symbol:PLCD3 description:phospholipase C delta 3 [Source:HGNC Symbol;Acc:HGNC:9061]	FALSE	TRUE	3.16857	1	2	1	High	High	High	High	Phospho [S496(100)]	7.66
High	ENSP00000406209.1	pep chromosome:GRCh38:19:55676625:55695441:1 gene:ENSG00000063245.14 transcript:ENST00000411543.6 gene_biotype:protein_coding transcript_biotype:protein_coding gene_symbol:EPN1 description:epsin 1 [Source:HGNC Symbol;Acc:HGNC:21604]	FALSE	TRUE	5.13595	2	2	2	High	High	High	High	Phospho [S521(100)]	8.86
High	ENSP00000262238.4	pep chromosome:GRCh38:14:100239144:100282788:1 gene:ENSG00000100811.14 transcript:ENST00000262238.10 gene_biotype:protein_coding transcript_biotype:protein_coding gene_symbol:YY1 description:YY1 transcription factor [Source:HGNC Symbol;Acc:HGNC:12856]	FALSE	TRUE	3.1401	1	2	1	High	High	High	High	Phospho [S118(100)]	7.65
High	ENSP00000463042.1	pep chromosome:GRCh38:17:58004588:58007261:-1 gene:ENSG00000136450.13 transcript:ENST00000584773.5 gene_biotype:protein_coding transcript_biotype:protein_coding gene_symbol:SRSF1 description:serine and arginine rich splicing factor 1 [Source:HGNC Symbol;Acc:HGNC:10780]	FALSE	TRUE	8.69565	3	12	3	High	High	High	High	Phospho [S199(100); S201(94.9); S238(97.9); S242(99.6); S244(99.6)]	8.38
High	ENSP00000398632.2	pep chromosome:GRCh38:11:35138870:35232402:1 gene:ENSG00000026508.18 transcript:ENST00000428726.7 gene_biotype:protein_coding transcript_biotype:protein_coding gene_symbol:CD44 description:CD44 molecule (Indian blood group) [Source:HGNC Symbol;Acc:HGNC:1681]	FALSE	TRUE	3.50404	2	4	2	High	High	High	High	Phospho [S706(100)]	7.16
High	ENSP00000330074.3	pep chromosome:GRCh38:6:27866849:27867529:-1 gene:ENSG00000184357.4 transcript:ENST00000331442.4 gene_biotype:protein_coding transcript_biotype:protein_coding gene_symbol:HIST1H1B description:histone cluster 1 H1 family member b [Source:HGNC Symbol;Acc:HGNC:4719]	FALSE	TRUE	12.8319	4	7	3	High	High	High	High	Phospho [S107(92.3); T138(100); S173(100); S189(100)]	2.76
High	ENSP00000329662.4	pep chromosome:GRCh38:3:129314771:129316286:-1 gene:ENSG00000184897.6 transcript:ENST00000333762.6 gene_biotype:protein_coding transcript_biotype:protein_coding gene_symbol:H1FX description:H1 histone family member X [Source:HGNC Symbol;Acc:HGNC:4722]	FALSE	TRUE	5.6338	2	5	2	High	High	High	High	Phospho [S31(100)]	4.96
High	ENSP00000494544.1	pep chromosome:GRCh38:21:37367101:37512772:1 gene:ENSG00000157540.21 transcript:ENST00000644942.1 gene_biotype:protein_coding transcript_biotype:protein_coding gene_symbol:DYRK1A description:dual specificity tyrosine phosphorylation regulated kinase 1A [Source:HGNC Symbol;Acc:HGNC:3091]	FALSE	TRUE	4.06291	2	3	2	High	High	High	High	Phospho [Y321(99.7); S758(97.8)]	9.09
High	ENSP00000265560.4	pep chromosome:GRCh38:3:49277144:49340053:-1 gene:ENSG00000114316.13 transcript:ENST00000265560.9 gene_biotype:protein_coding transcript_biotype:protein_coding gene_symbol:USP4 description:ubiquitin specific peptidase 4 [Source:HGNC Symbol;Acc:HGNC:12627]	FALSE	TRUE	2.49221	1	4	1	High	High	High	High	Phospho [S675(92.2); S680(99.3)]	10.18
High	ENSP00000320117.7	pep chromosome:GRCh38:19:6739680:6751530:1 gene:ENSG00000125733.18 transcript:ENST00000313244.14 gene_biotype:protein_coding transcript_biotype:protein_coding gene_symbol:TRIP10 description:thyroid hormone receptor interactor 10 [Source:HGNC Symbol;Acc:HGNC:12304]	FALSE	TRUE	2.99501	1	5	1	High	High	High	High	Phospho [S298(91.4); S299(99.1)]	12.08
High	ENSP00000233575.2	pep chromosome:GRCh38:2:27370616:27377535:1 gene:ENSG00000115234.11 transcript:ENST00000233575.7 gene_biotype:protein_coding transcript_biotype:protein_coding gene_symbol:SNX17 description:sorting nexin 17 [Source:HGNC Symbol;Acc:HGNC:14979]	FALSE	TRUE	5.31915	2	8	2	High	High	High	High	Phospho [S336(85.5); S409(100)]	8.45
High	ENSP00000360985.4	pep chromosome:GRCh38:20:48921711:49036693:1 gene:ENSG00000124198.9 transcript:ENST00000371917.5 gene_biotype:protein_coding transcript_biotype:protein_coding gene_symbol:ARFGEF2 description:ADP ribosylation factor guanine nucleotide exchange factor 2 [Source:HGNC Symbol;Acc:HGNC:15853]	FALSE	TRUE	2.18487	2	5	2	High	High	High	High	Phospho [S227(100); S277(85)]	12.06
High	ENSP00000262376.5	pep chromosome:GRCh38:16:4847481:4882401:1 gene:ENSG00000118900.15 transcript:ENST00000262376.11 gene_biotype:protein_coding transcript_biotype:protein_coding gene_symbol:UBN1 description:ubinuclein 1 [Source:HGNC Symbol;Acc:HGNC:12506]	FALSE	TRUE	2.1164	3	4	3	High	High	High	High	Phospho [S173(100); S175(100); S493(100)]	12.33
High	ENSP00000385861.1	pep chromosome:GRCh38:22:26491927:26512496:-1 gene:ENSG00000100109.17 transcript:ENST00000407148.5 gene_biotype:protein_coding transcript_biotype:protein_coding gene_symbol:TFIP11 description:tuftelin interacting protein 11 [Source:HGNC Symbol;Acc:HGNC:17165]	FALSE	TRUE	7.76583	3	3	3	High	High	High	High	Phospho [S59(100); S98(100); S210(100)]	6.18
High	ENSP00000363714.3	pep chromosome:GRCh38:9:109015135:109119947:-1 gene:ENSG00000106771.13 transcript:ENST00000374586.8 gene_biotype:protein_coding transcript_biotype:protein_coding gene_symbol:TMEM245 description:transmembrane protein 245 [Source:HGNC Symbol;Acc:HGNC:1363]	FALSE	TRUE	5.46075	3	6	3	High	High	High	High	Phospho [T36(98.9); S332(90.1)]	12.86
High	ENSP00000467024.1	pep chromosome:GRCh38:19:12945862:12953642:1 gene:ENSG00000179262.10 transcript:ENST00000586534.6 gene_biotype:protein_coding transcript_biotype:protein_coding gene_symbol:RAD23A description:RAD23 homolog A, nucleotide excision repair protein [Source:HGNC Symbol;Acc:HGNC:9812]	FALSE	TRUE	11.0193	2	5	2	High	High	High	High	Phospho [T24(100); S123(98.6)]	11.72
High	ENSP00000348274.4	pep chromosome:GRCh38:10:112950250:113167678:1 gene:ENSG00000148737.17 transcript:ENST00000355995.8 gene_biotype:protein_coding transcript_biotype:protein_coding gene_symbol:TCF7L2 description:transcription factor 7 like 2 [Source:HGNC Symbol;Acc:HGNC:11641]	FALSE	TRUE	3.39257	1	5	1	High	High	High	High	Phospho [S60(99.8)]	10.21
High	ENSP00000301962.5	pep chromosome:GRCh38:7:6104884:6161564:1 gene:ENSG00000106346.11 transcript:ENST00000306177.9 gene_biotype:protein_coding transcript_biotype:protein_coding gene_symbol:USP42 description:ubiquitin specific peptidase 42 [Source:HGNC Symbol;Acc:HGNC:20068]	FALSE	TRUE	4.55927	4	4	4	High	High	High	High	Phospho [S754(88.2); S936(100); S1116(93); S1219(100); S1222(100); S1226(100)]	11.64
High	ENSP00000353622.4	pep chromosome:GRCh38:15:75370933:75455783:-1 gene:ENSG00000169375.16 transcript:ENST00000360439.8 gene_biotype:protein_coding transcript_biotype:protein_coding gene_symbol:SIN3A description:SIN3 transcription regulator family member A [Source:HGNC Symbol;Acc:HGNC:19353]	FALSE	TRUE	5.65593	3	3	3	High	High	High	High	Phospho [S277(100); S832(100); S940(99)]	8.05
High	ENSP00000440045.2	pep chromosome:GRCh38:12:110281247:110351093:1 gene:ENSG00000174437.17 transcript:ENST00000539276.7 gene_biotype:protein_coding transcript_biotype:protein_coding gene_symbol:ATP2A2 description:ATPase sarcoplasmic/endoplasmic reticulum Ca2+ transporting 2 [Source:HGNC Symbol;Acc:HGNC:812]	FALSE	TRUE	2.20729	2	3	2	High	High	High	High	Phospho [S663(100)]	7.21
High	ENSP00000382204.2	pep chromosome:GRCh38:10:63167225:63465977:-1 gene:ENSG00000171988.19 transcript:ENST00000399262.7 gene_biotype:protein_coding transcript_biotype:protein_coding gene_symbol:JMJD1C description:jumonji domain containing 1C [Source:HGNC Symbol;Acc:HGNC:12313]	FALSE	TRUE	1.69291	4	4	4	High	High	High	High	Phospho [S319(91.8); S617(100); S641(100); S943(99.9)]	9.83
High	ENSP00000264447.4	pep chromosome:GRCh38:2:71331782:71435061:1 gene:ENSG00000075292.19 transcript:ENST00000264447.9 gene_biotype:protein_coding transcript_biotype:protein_coding gene_symbol:ZNF638 description:zinc finger protein 638 [Source:HGNC Symbol;Acc:HGNC:17894]	FALSE	TRUE	2.32558	4	5	4	High	High	High	High	Phospho [S605(100); S1100(100)]	6.18
High	ENSP00000264052.5	pep chromosome:GRCh38:2:230415942:230516527:1 gene:ENSG00000067066.17 transcript:ENST00000264052.9 gene_biotype:protein_coding transcript_biotype:protein_coding gene_symbol:SP100 description:SP100 nuclear antigen [Source:HGNC Symbol;Acc:HGNC:11206]	FALSE	TRUE	7.96359	4	5	3	High	High	High	High	Phospho [S18(100); S157(100)]	12.96
High	ENSP00000248420.5	pep chromosome:GRCh38:19:3610650:3626815:-1 gene:ENSG00000105298.14 transcript:ENST00000248420.9 gene_biotype:protein_coding transcript_biotype:protein_coding gene_symbol:CACTIN description:cactin, spliceosome C complex subunit [Source:HGNC Symbol;Acc:HGNC:29938]	FALSE	TRUE	2.90237	2	4	2	High	High	High	High	Phospho [S90(100); S489(94.3)]	9.55
High	ENSP00000368856.3	pep chromosome:GRCh38:9:33290516:33371157:1 gene:ENSG00000086102.19 transcript:ENST00000379540.8 gene_biotype:protein_coding transcript_biotype:protein_coding gene_symbol:NFX1 description:nuclear transcription factor, X-box binding 1 [Source:HGNC Symbol;Acc:HGNC:7803]	FALSE	TRUE	1.51786	2	4	2	High	High	High	High	Phospho [S152(94.7)]	4.94
High	ENSP00000449747.1	pep chromosome:GRCh38:12:48653402:48682225:-1 gene:ENSG00000139620.12 transcript:ENST00000550347.5 gene_biotype:protein_coding transcript_biotype:protein_coding gene_symbol:KANSL2 description:KAT8 regulatory NSL complex subunit 2 [Source:HGNC Symbol;Acc:HGNC:26024]	FALSE	TRUE	2.81481	1	5	1	High	High	High	High	Phospho [S358(100)]	16.07
High	ENSP00000330349.8	pep chromosome:GRCh38:5:177511577:177516961:-1 gene:ENSG00000183258.12 transcript:ENST00000330503.12 gene_biotype:protein_coding transcript_biotype:protein_coding gene_symbol:DDX41 description:DEAD-box helicase 41 [Source:HGNC Symbol;Acc:HGNC:18674]	FALSE	TRUE	4.50161	1	4	1	High	High	High	High	Phospho [S23(99.1)]	9.24
High	ENSP00000261366.5	pep chromosome:GRCh38:5:126777136:126837020:1 gene:ENSG00000113368.12 transcript:ENST00000261366.10 gene_biotype:protein_coding transcript_biotype:protein_coding gene_symbol:LMNB1 description:lamin B1 [Source:HGNC Symbol;Acc:HGNC:6637]	FALSE	TRUE	9.89761	4	5	2	High	High	High	High	Phospho [S23(91.3); S393(93.9); T575(100)]	6.31
High	ENSP00000404854.2	pep chromosome:GRCh38:8:133237176:133297586:-1 gene:ENSG00000104419.14 transcript:ENST00000414097.6 gene_biotype:protein_coding transcript_biotype:protein_coding gene_symbol:NDRG1 description:N-myc downstream regulated 1 [Source:HGNC Symbol;Acc:HGNC:7679]	FALSE	TRUE	7.61421	2	5	2	High	High	High	High	Phospho [S332(99.9); S333(99.9); S336(99.9)]	11.52
High	ENSP00000274311.2	pep chromosome:GRCh38:5:52787916:52804044:1 gene:ENSG00000152684.11 transcript:ENST00000274311.3 gene_biotype:protein_coding transcript_biotype:protein_coding gene_symbol:PELO description:pelota mRNA surveillance and ribosome rescue factor [Source:HGNC Symbol;Acc:HGNC:8829]	FALSE	TRUE	4.67532	1	3	1	High	High	High	High	Phospho [S374(100)]	12.28
High	ENSP00000353401.3	pep chromosome:GRCh38:7:101816011:102258233:1 gene:ENSG00000257923.11 transcript:ENST00000360264.7 gene_biotype:protein_coding transcript_biotype:protein_coding gene_symbol:CUX1 description:cut like homeobox 1 [Source:HGNC Symbol;Acc:HGNC:2557]	FALSE	TRUE	2.57256	2	4	2	High	High	High	High	Phospho [S1281(100); S1344(91.9); S1348(91.9)]	9.65
High	ENSP00000472802.1	pep chromosome:GRCh38:19:58476352:58481230:1 gene:ENSG00000083838.16 transcript:ENST00000594369.6 gene_biotype:protein_coding transcript_biotype:protein_coding gene_symbol:ZNF446 description:zinc finger protein 446 [Source:HGNC Symbol;Acc:HGNC:21036]	FALSE	TRUE	5.55556	1	3	1	High	High	High	High	Phospho [S137(100)]	11.51
High	ENSP00000362550.4	pep chromosome:GRCh38:6:37433221:37481508:1 gene:ENSG00000137200.13 transcript:ENST00000373451.9 gene_biotype:protein_coding transcript_biotype:protein_coding gene_symbol:CMTR1 description:cap methyltransferase 1 [Source:HGNC Symbol;Acc:HGNC:21077]	FALSE	TRUE	1.91617	1	8	1	High	High	High	High	Phospho [S53(100); S55(100)]	14.19
High	ENSP00000314129.7	pep chromosome:GRCh38:X:49028726:49043357:-1 gene:ENSG00000068323.17 transcript:ENST00000315869.8 gene_biotype:protein_coding transcript_biotype:protein_coding gene_symbol:TFE3 description:transcription factor binding to IGHM enhancer 3 [Source:HGNC Symbol;Acc:HGNC:11752]	FALSE	TRUE	4.34783	2	9	2	High	High	High	High	Phospho [S556(100); S567(94)]	12.32
High	ENSP00000498741.1	pep chromosome:GRCh38:16:14435911:14630208:-1 gene:ENSG00000140694.17 transcript:ENST00000650990.1 gene_biotype:protein_coding transcript_biotype:protein_coding gene_symbol:PARN description:poly(A)-specific ribonuclease [Source:HGNC Symbol;Acc:HGNC:8609]	FALSE	TRUE	7.22892	2	3	2	High	High	High	High	Phospho [S644(100)]	9.04
High	ENSP00000390394.1	pep chromosome:GRCh38:3:27376606:27484347:-1 gene:ENSG00000033867.16 transcript:ENST00000454389.5 gene_biotype:protein_coding transcript_biotype:protein_coding gene_symbol:SLC4A7 description:solute carrier family 4 member 7 [Source:HGNC Symbol;Acc:HGNC:11033]	FALSE	TRUE	3.41541	3	7	3	High	High	High	High	Phospho [S93(98.7); S1258(100)]	9.74
High	ENSP00000324827.3	pep chromosome:GRCh38:X:1591604:1602520:1 gene:ENSG00000197976.12 transcript:ENST00000313871.9 gene_biotype:protein_coding transcript_biotype:protein_coding gene_symbol:AKAP17A description:A-kinase anchoring protein 17A [Source:HGNC Symbol;Acc:HGNC:18783]	FALSE	TRUE	4.89209	4	9	3	High	High	High	High	Phospho [S537(100); S633(100); S640(96.4); S683(100); S685(100)]	13.24
High	ENSP00000365694.2	pep chromosome:GRCh38:6:30600413:30617243:-1 gene:ENSG00000204569.10 transcript:ENST00000376511.7 gene_biotype:protein_coding transcript_biotype:protein_coding gene_symbol:PPP1R10 description:protein phosphatase 1 regulatory subunit 10 [Source:HGNC Symbol;Acc:HGNC:9284]	FALSE	TRUE	5.31915	2	5	2	High	High	High	High	Phospho [T315(93.6); S545(88.1)]	9.03
High	ENSP00000422440.1	pep chromosome:GRCh38:6:43225631:43229453:-1 gene:ENSG00000112667.12 transcript:ENST00000509253.5 gene_biotype:protein_coding transcript_biotype:protein_coding gene_symbol:DNPH1 description:2'-deoxynucleoside 5'-phosphate N-hydrolase 1 [Source:HGNC Symbol;Acc:HGNC:21218]	FALSE	TRUE	7.40741	1	5	1	High	High	High	High	Phospho [S238(100)]	20.39
High	ENSP00000234170.5	pep chromosome:GRCh38:2:37201612:37231596:-1 gene:ENSG00000115816.15 transcript:ENST00000234170.10 gene_biotype:protein_coding transcript_biotype:protein_coding gene_symbol:CEBPZ description:CCAAT enhancer binding protein zeta [Source:HGNC Symbol;Acc:HGNC:24218]	FALSE	TRUE	2.46679	1	3	1	High	High	High	High	Phospho [S629(100)]	9.14
High	ENSP00000363576.5	pep chromosome:GRCh38:1:23967307:23980308:-1 gene:ENSG00000188529.15 transcript:ENST00000374452.9 gene_biotype:protein_coding transcript_biotype:protein_coding gene_symbol:SRSF10 description:serine and arginine rich splicing factor 10 [Source:HGNC Symbol;Acc:HGNC:16713]	FALSE	TRUE	15.0289	4	6	1	High	High	High	High	Phospho [S131(98.3); S133(99.7); S141(99.8); S143(95.9); S160(93.5)]	7.19
High	ENSP00000500802.1	pep chromosome:GRCh38:1:155946855:155991212:-1 gene:ENSG00000116584.19 transcript:ENST00000673475.1 gene_biotype:protein_coding transcript_biotype:protein_coding gene_symbol:ARHGEF2 description:Rho/Rac guanine nucleotide exchange factor 2 [Source:HGNC Symbol;Acc:HGNC:682]	FALSE	TRUE	3.80868	3	5	3	High	High	High	High	Phospho [S1075(100); S1099(99.7); S1103(100)]	13.16
High	ENSP00000252268.4	pep chromosome:GRCh38:11:65333867:65352983:1 gene:ENSG00000133884.10 transcript:ENST00000252268.8 gene_biotype:protein_coding transcript_biotype:protein_coding gene_symbol:DPF2 description:double PHD fingers 2 [Source:HGNC Symbol;Acc:HGNC:9964]	FALSE	TRUE	3.7037	1	3	1	High	High	High	High	Phospho [S142(100)]	13.43
High	ENSP00000363559.3	pep chromosome:GRCh38:20:35278911:35284715:-1 gene:ENSG00000242372.8 transcript:ENST00000374436.7 gene_biotype:protein_coding transcript_biotype:protein_coding gene_symbol:EIF6 description:eukaryotic translation initiation factor 6 [Source:HGNC Symbol;Acc:HGNC:6159]	FALSE	TRUE	18.7755	3	5	3	High	High	High	High	Phospho [S239(87.9)]	7.81
High	ENSP00000367096.2	pep chromosome:GRCh38:13:66302834:67230336:-1 gene:ENSG00000184226.15 transcript:ENST00000377865.7 gene_biotype:protein_coding transcript_biotype:protein_coding gene_symbol:PCDH9 description:protocadherin 9 [Source:HGNC Symbol;Acc:HGNC:8661]	FALSE	TRUE	3.15279	2	4	2	High	High	High	High	Phospho [S932(100)]	7.98
High	ENSP00000321746.4	pep chromosome:GRCh38:4:94451942:94668223:1 gene:ENSG00000163110.15 transcript:ENST00000317968.9 gene_biotype:protein_coding transcript_biotype:protein_coding gene_symbol:PDLIM5 description:PDZ and LIM domain 5 [Source:HGNC Symbol;Acc:HGNC:17468]	FALSE	TRUE	3.85906	2	7	2	High	High	High	High	Phospho [T110(95.3); S228(100)]	8.26
High	ENSP00000339299.4	pep chromosome:GRCh38:5:14143342:14510204:1 gene:ENSG00000038382.20 transcript:ENST00000344204.9 gene_biotype:protein_coding transcript_biotype:protein_coding gene_symbol:TRIO description:trio Rho guanine nucleotide exchange factor [Source:HGNC Symbol;Acc:HGNC:12303]	FALSE	TRUE	1.1947	2	3	2	High	High	High	High	Phospho [S1723(96.3); S1818(100)]	8.56
High	ENSP00000363787.4	pep chromosome:GRCh38:6:33208500:33212716:1 gene:ENSG00000204227.5 transcript:ENST00000374656.5 gene_biotype:protein_coding transcript_biotype:protein_coding gene_symbol:RING1 description:ring finger protein 1 [Source:HGNC Symbol;Acc:HGNC:10018]	FALSE	TRUE	7.63547	1	2	1	High	High	High	High	Phospho [S232(100)]	9.6
High	ENSP00000317636.5	pep chromosome:GRCh38:17:75626854:75667154:-1 gene:ENSG00000108469.15 transcript:ENST00000317905.10 gene_biotype:protein_coding transcript_biotype:protein_coding gene_symbol:RECQL5 description:RecQ like helicase 5 [Source:HGNC Symbol;Acc:HGNC:9950]	FALSE	TRUE	6.05449	3	6	3	High	High	High	High	Phospho [S491(77.6); S727(100); S815(100)]	7.38
High	ENSP00000326519.6	pep chromosome:GRCh38:16:29816152:29822489:1 gene:ENSG00000280789.2 transcript:ENST00000320330.8 gene_biotype:protein_coding transcript_biotype:protein_coding gene_symbol:PAGR1 description:PAXIP1 associated glutamate rich protein 1 [Source:HGNC Symbol;Acc:HGNC:28707]	FALSE	TRUE	7.08661	1	2	1	High	High	High	High	Phospho [S237(100)]	8.5
High	ENSP00000362751.4	pep chromosome:GRCh38:9:122941020:123104866:1 gene:ENSG00000011454.17 transcript:ENST00000373647.9 gene_biotype:protein_coding transcript_biotype:protein_coding gene_symbol:RABGAP1 description:RAB GTPase activating protein 1 [Source:HGNC Symbol;Acc:HGNC:17155]	FALSE	TRUE	3.64827	3	4	3	High	High	High	High	Phospho [S42(100); T996(100)]	11.71
High	ENSP00000419446.2	pep chromosome:GRCh38:8:38996973:39105261:1 gene:ENSG00000168615.12 transcript:ENST00000487273.7 gene_biotype:protein_coding transcript_biotype:protein_coding gene_symbol:ADAM9 description:ADAM metallopeptidase domain 9 [Source:HGNC Symbol;Acc:HGNC:216]	FALSE	TRUE	1.0989	1	10	1	High	High	High	High	Phospho [T761(100)]	17.21
High	ENSP00000377385.4	pep chromosome:GRCh38:19:10106395:10114738:1 gene:ENSG00000243207.6 transcript:ENST00000393796.4 gene_biotype:protein_coding transcript_biotype:protein_coding gene_symbol:PPAN-P2RY11 description:PPAN-P2RY11 readthrough [Source:HGNC Symbol;Acc:HGNC:33526]	FALSE	TRUE	1.76322	1	4	1	High	High	High	High	Phospho [S359(100)]	12.07
High	ENSP00000254260.2	pep chromosome:GRCh38:19:32978592:33064888:-1 gene:ENSG00000131941.8 transcript:ENST00000254260.8 gene_biotype:protein_coding transcript_biotype:protein_coding gene_symbol:RHPN2 description:rhophilin Rho GTPase binding protein 2 [Source:HGNC Symbol;Acc:HGNC:19974]	FALSE	TRUE	5.68513	4	5	4	High	High	High	High	Phospho [T606(94.2); S642(99.9); T655(99.1)]	4.04
High	ENSP00000237536.4	pep chromosome:GRCh38:20:36777447:36863538:-1 gene:ENSG00000149639.15 transcript:ENST00000237536.9 gene_biotype:protein_coding transcript_biotype:protein_coding gene_symbol:SOGA1 description:suppressor of glucose, autophagy associated 1 [Source:HGNC Symbol;Acc:HGNC:16111]	FALSE	TRUE	1.2643	2	11	2	High	High	High	High	Phospho [S1541(100)]	11.94
High	ENSP00000442718.2	pep chromosome:GRCh38:12:122980060:122982913:1 gene:ENSG00000182196.13 transcript:ENST00000543566.5 gene_biotype:protein_coding transcript_biotype:protein_coding gene_symbol:ARL6IP4 description:ADP ribosylation factor like GTPase 6 interacting protein 4 [Source:HGNC Symbol;Acc:HGNC:18076]	FALSE	TRUE	6.46766	2	5	2	High	High	High	High	Phospho [S313(100)]	10.94
High	ENSP00000368539.2	pep chromosome:GRCh38:10:11460510:11573737:-1 gene:ENSG00000148429.14 transcript:ENST00000379237.6 gene_biotype:protein_coding transcript_biotype:protein_coding gene_symbol:USP6NL description:USP6 N-terminal like [Source:HGNC Symbol;Acc:HGNC:16858]	FALSE	TRUE	4.23032	2	3	2	High	High	High	High	Phospho [S703(90.1); S739(99.6)]	8.48
High	ENSP00000489051.1	pep chromosome:GRCh38:1:20807319:21176836:-1 gene:ENSG00000075151.20 transcript:ENST00000634879.1 gene_biotype:protein_coding transcript_biotype:protein_coding gene_symbol:EIF4G3 description:eukaryotic translation initiation factor 4 gamma 3 [Source:HGNC Symbol;Acc:HGNC:3298]	FALSE	TRUE	2.25479	4	5	4	High	High	High	High	Phospho [S684(100); S1771(100)]	6.88
High	ENSP00000493536.1	pep chromosome:GRCh38:20:36889773:36951901:-1 gene:ENSG00000101347.9 transcript:ENST00000646673.1 gene_biotype:protein_coding transcript_biotype:protein_coding gene_symbol:SAMHD1 description:SAM and HD domain containing deoxynucleoside triphosphate triphosphohydrolase 1 [Source:HGNC Symbol;Acc:HGNC:15925]	FALSE	TRUE	3.67412	1	2	1	High	High	High	High	Phospho [S33(100)]	7.63
High	ENSP00000349456.2	pep chromosome:GRCh38:1:108929508:108963457:-1 gene:ENSG00000121940.15 transcript:ENST00000356970.6 gene_biotype:protein_coding transcript_biotype:protein_coding gene_symbol:CLCC1 description:chloride channel CLIC like 1 [Source:HGNC Symbol;Acc:HGNC:29675]	FALSE	TRUE	8.52995	2	2	2	High	High	High	High	Phospho [S509(100); S532(83.3)]	8.48
High	ENSP00000394400.2	pep chromosome:GRCh38:CHR_HSCHR6_MHC_COX_CTG1:31946626:31957297:1 gene:ENSG00000225737.9 transcript:ENST00000448219.4 gene_biotype:protein_coding transcript_biotype:protein_coding gene_symbol:SKIV2L description:Ski2 like RNA helicase [Source:HGNC Symbol;Acc:HGNC:10898]	FALSE	TRUE	2.00642	2	7	2	High	High	High	High	Phospho [S245(98.5); S256(99.8)]	12.93
High	ENSP00000363322.3	pep chromosome:GRCh38:9:113266992:113275572:-1 gene:ENSG00000176386.9 transcript:ENST00000374206.4 gene_biotype:protein_coding transcript_biotype:protein_coding gene_symbol:CDC26 description:cell division cycle 26 [Source:HGNC Symbol;Acc:HGNC:17839]	FALSE	TRUE	38.8235	2	3	2	High	High	High	High	Phospho [S42(100); S82(98.9)]	10.25
High	ENSP00000437738.1	pep chromosome:GRCh38:12:131711137:131799602:1 gene:ENSG00000061936.9 transcript:ENST00000541286.5 gene_biotype:protein_coding transcript_biotype:protein_coding gene_symbol:SFSWAP description:splicing factor SWAP [Source:HGNC Symbol;Acc:HGNC:10790]	FALSE	TRUE	3.48953	4	6	4	High	High	High	High	Phospho [S604(100); S896(100); S898(100); S918(100); S920(100); S922(99.2); S961(100)]	10.42
High	ENSP00000261182.8	pep chromosome:GRCh38:12:76044902:76084958:-1 gene:ENSG00000187109.14 transcript:ENST00000261182.12 gene_biotype:protein_coding transcript_biotype:protein_coding gene_symbol:NAP1L1 description:nucleosome assembly protein 1 like 1 [Source:HGNC Symbol;Acc:HGNC:7637]	FALSE	TRUE	4.34783	1	3	1	High	High	High	High	Phospho [T62(100)]	11.88
High	ENSP00000484894.1	pep chromosome:GRCh38:CHR_HSCHR10_1_CTG4:77790791:77926526:-1 gene:ENSG00000274429.2 transcript:ENST00000614211.2 gene_biotype:protein_coding transcript_biotype:protein_coding gene_symbol:DLG5 description:discs large MAGUK scaffold protein 5 [Source:HGNC Symbol;Acc:HGNC:2904]	FALSE	TRUE	2.29286	4	6	4	High	High	High	High	Phospho [S1000(100); S1232(100)]	8.71
High	ENSP00000360727.6	pep chromosome:GRCh38:9:136807967:136841177:1 gene:ENSG00000196642.19 transcript:ENST00000371663.10 gene_biotype:protein_coding transcript_biotype:protein_coding gene_symbol:RABL6 description:RAB, member RAS oncogene family like 6 [Source:HGNC Symbol;Acc:HGNC:24703]	FALSE	TRUE	3.42466	3	6	3	High	High	High	High	Phospho [S493(100); S642(99.6)]	8.15
High	ENSP00000265107.4	pep chromosome:GRCh38:5:37379318:37753435:1 gene:ENSG00000082068.9 transcript:ENST00000265107.9 gene_biotype:protein_coding transcript_biotype:protein_coding gene_symbol:WDR70 description:WD repeat domain 70 [Source:HGNC Symbol;Acc:HGNC:25495]	FALSE	TRUE	5.50459	2	4	2	High	High	High	High	Phospho [S84(89.4); S85(98.6); S87(98.6); S638(100)]	9.96
High	ENSP00000262133.6	pep chromosome:GRCh38:16:53434471:53491648:1 gene:ENSG00000103479.16 transcript:ENST00000262133.11 gene_biotype:protein_coding transcript_biotype:protein_coding gene_symbol:RBL2 description:RB transcriptional corepressor like 2 [Source:HGNC Symbol;Acc:HGNC:9894]	FALSE	TRUE	3.59965	3	5	3	High	High	High	High	Phospho [S639(100); T642(100); S688(88.2); S1080(100)]	12.46
High	ENSP00000481721.1	pep chromosome:GRCh38:9:98199011:98255649:-1 gene:ENSG00000095383.20 transcript:ENST00000465784.7 gene_biotype:protein_coding transcript_biotype:protein_coding gene_symbol:TBC1D2 description:TBC1 domain family member 2 [Source:HGNC Symbol;Acc:HGNC:18026]	FALSE	TRUE	1.72414	1	2	1	High	High	High	High	Phospho [S920(100)]	7.81
High	ENSP00000313983.7	pep chromosome:GRCh38:8:38269704:38382271:-1 gene:ENSG00000147548.17 transcript:ENST00000317025.13 gene_biotype:protein_coding transcript_biotype:protein_coding gene_symbol:NSD3 description:nuclear receptor binding SET domain protein 3 [Source:HGNC Symbol;Acc:HGNC:12767]	FALSE	TRUE	2.6444	3	6	3	High	High	High	High	Phospho [S150(99.7); S561(99.9); S585(99.7)]	6.69
High	ENSP00000417354.1	pep chromosome:GRCh38:3:168008689:168095924:-1 gene:ENSG00000173905.9 transcript:ENST00000470487.6 gene_biotype:protein_coding transcript_biotype:protein_coding gene_symbol:GOLIM4 description:golgi integral membrane protein 4 [Source:HGNC Symbol;Acc:HGNC:15448]	FALSE	TRUE	3.87931	2	3	2	High	High	High	High	Phospho [S538(100); S583(100)]	9.3
High	ENSP00000265333.3	pep chromosome:GRCh38:5:133971871:134004975:-1 gene:ENSG00000213585.11 transcript:ENST00000265333.8 gene_biotype:protein_coding transcript_biotype:protein_coding gene_symbol:VDAC1 description:voltage dependent anion channel 1 [Source:HGNC Symbol;Acc:HGNC:12669]	FALSE	TRUE	4.947	2	6	2	High	High	High	High	Phospho [S104(100)]	11.11
High	ENSP00000263036.3	pep chromosome:GRCh38:10:13099449:13136923:1 gene:ENSG00000123240.17 transcript:ENST00000263036.9 gene_biotype:protein_coding transcript_biotype:protein_coding gene_symbol:OPTN description:optineurin [Source:HGNC Symbol;Acc:HGNC:17142]	FALSE	TRUE	2.25303	1	2	1	High	High	High	High	Phospho [S526(99.8)]	9.15
High	ENSP00000263202.9	pep chromosome:GRCh38:22:19449911:19479193:-1 gene:ENSG00000070010.19 transcript:ENST00000263202.15 gene_biotype:protein_coding transcript_biotype:protein_coding gene_symbol:UFD1 description:ubiquitin recognition factor in ER associated degradation 1 [Source:HGNC Symbol;Acc:HGNC:12520]	FALSE	TRUE	5.21173	2	3	2	High	High	High	High	Phospho [S247(99.9)]	2.07
High	ENSP00000463949.1	pep chromosome:GRCh38:17:40122573:40130293:1 gene:ENSG00000188895.12 transcript:ENST00000577454.5 gene_biotype:protein_coding transcript_biotype:protein_coding gene_symbol:MSL1 description:MSL complex subunit 1 [Source:HGNC Symbol;Acc:HGNC:27905]	FALSE	TRUE	11.0629	3	4	3	High	High	High	High	Phospho [S126(100); S362(100)]	6.25
High	ENSP00000498353.1	pep chromosome:GRCh38:11:119044311:119057227:-1 gene:ENSG00000149428.19 transcript:ENST00000652093.1 gene_biotype:protein_coding transcript_biotype:protein_coding gene_symbol:HYOU1 description:hypoxia up-regulated 1 [Source:HGNC Symbol;Acc:HGNC:16931]	FALSE	TRUE	2.1	1	2	1	High	High	High	High	Phospho [S567(99.6)]	8.44
High	ENSP00000500166.1	pep chromosome:GRCh38:CHR_HG1320_PATCH:81772649:81783500:-1 gene:ENSG00000288213.1 transcript:ENST00000671931.1 gene_biotype:protein_coding transcript_biotype:protein_coding gene_symbol:MCRIP1 description:MAPK regulated corepressor interacting protein 1 [Source:HGNC Symbol;Acc:HGNC:28007]	FALSE	TRUE	19.4915	1	4	1	High	High	High	High	Phospho [S42(84.6)]	8.75
High	ENSP00000339495.5	pep chromosome:GRCh38:9:137255327:137273542:1 gene:ENSG00000188986.7 transcript:ENST00000343053.5 gene_biotype:protein_coding transcript_biotype:protein_coding gene_symbol:NELFB description:negative elongation factor complex member B [Source:HGNC Symbol;Acc:HGNC:24324]	FALSE	TRUE	4.14013	1	2	1	High	High	High	High	Phospho [S605(100)]	5.4
High	ENSP00000417509.2	pep chromosome:GRCh38:3:56622738:56683017:-1 gene:ENSG00000163946.13 transcript:ENST00000493960.6 gene_biotype:protein_coding transcript_biotype:protein_coding gene_symbol:TASOR description:transcription activation suppressor [Source:HGNC Symbol;Acc:HGNC:30314]	FALSE	TRUE	3.04233	3	5	3	High	High	High	High	Phospho [S699(94.3); S927(98.6)]	13.11
High	ENSP00000264926.2	pep chromosome:GRCh38:3:8877075:8963472:-1 gene:ENSG00000070950.10 transcript:ENST00000264926.7 gene_biotype:protein_coding transcript_biotype:protein_coding gene_symbol:RAD18 description:RAD18 E3 ubiquitin protein ligase [Source:HGNC Symbol;Acc:HGNC:18278]	FALSE	TRUE	3.63636	2	5	2	High	High	High	High	Phospho [S164(100); S471(100)]	15.67
High	ENSP00000014914.5	pep chromosome:GRCh38:12:12890782:12917937:1 gene:ENSG00000013588.8 transcript:ENST00000014914.5 gene_biotype:protein_coding transcript_biotype:protein_coding gene_symbol:GPRC5A description:G protein-coupled receptor class C group 5 member A [Source:HGNC Symbol;Acc:HGNC:9836]	FALSE	TRUE	3.92157	2	3	2	High	High	High	High	Phospho [S345(94)]	5.71
High	ENSP00000265433.3	pep chromosome:GRCh38:8:89933336:89984716:-1 gene:ENSG00000104320.13 transcript:ENST00000265433.7 gene_biotype:protein_coding transcript_biotype:protein_coding gene_symbol:NBN description:nibrin [Source:HGNC Symbol;Acc:HGNC:7652]	FALSE	TRUE	2.12202	2	4	2	High	High	High	High	Phospho [S432(100)]	8.02
High	ENSP00000365312.2	pep chromosome:GRCh38:10:26746593:26860935:-1 gene:ENSG00000136754.17 transcript:ENST00000376142.6 gene_biotype:protein_coding transcript_biotype:protein_coding gene_symbol:ABI1 description:abl interactor 1 [Source:HGNC Symbol;Acc:HGNC:11320]	FALSE	TRUE	7.28346	3	6	3	High	High	High	High	Phospho [S183(90.4); S225(94.1); S240(99.9); S242(91.2)]	8.3
High	ENSP00000421757.1	pep chromosome:GRCh38:4:39498788:39526557:-1 gene:ENSG00000109814.12 transcript:ENST00000506179.5 gene_biotype:protein_coding transcript_biotype:protein_coding gene_symbol:UGDH description:UDP-glucose 6-dehydrogenase [Source:HGNC Symbol;Acc:HGNC:12525]	FALSE	TRUE	8.90688	3	3	3	High	High	High	High	Phospho [T91(100)]	7.65
High	ENSP00000305151.7	pep chromosome:GRCh38:5:160091339:160119450:-1 gene:ENSG00000170234.13 transcript:ENST00000307063.9 gene_biotype:protein_coding transcript_biotype:protein_coding gene_symbol:PWWP2A description:PWWP domain containing 2A [Source:HGNC Symbol;Acc:HGNC:29406]	FALSE	TRUE	1.8543	1	2	1	High	High	High	High	Phospho [S81(100)]	7.17
High	ENSP00000310448.5	pep chromosome:GRCh38:11:65961734:65980137:1 gene:ENSG00000175467.15 transcript:ENST00000312397.10 gene_biotype:protein_coding transcript_biotype:protein_coding gene_symbol:SART1 description:spliceosome associated factor 1, recruiter of U4/U6.U5 tri-snRNP [Source:HGNC Symbol;Acc:HGNC:10538]	FALSE	TRUE	7	2	2	2	High	High	High	High	Phospho [S448(100); S486(100)]	8.17
High	ENSP00000360488.3	pep chromosome:GRCh38:10:93667883:93702592:-1 gene:ENSG00000148690.12 transcript:ENST00000359204.5 gene_biotype:protein_coding transcript_biotype:protein_coding gene_symbol:FRA10AC1 description:FRA10A associated CGG repeat 1 [Source:HGNC Symbol;Acc:HGNC:1162]	FALSE	TRUE	7.30159	2	2	2	High	High	High	High	Phospho [S285(100)]	7.14
High	ENSP00000353246.5	pep chromosome:GRCh38:8:33485182:33501262:1 gene:ENSG00000198042.11 transcript:ENST00000360128.11 gene_biotype:protein_coding transcript_biotype:protein_coding gene_symbol:MAK16 description:MAK16 homolog [Source:HGNC Symbol;Acc:HGNC:13703]	FALSE	TRUE	17	2	5	2	High	High	High	High	Phospho [S199(98.4); S200(88.5); T202(100); S253(86); S254(97.4)]	10
High	ENSP00000388677.1	pep chromosome:GRCh38:2:74455088:74460884:1 gene:ENSG00000274049.4 transcript:ENST00000452361.5 gene_biotype:protein_coding transcript_biotype:nonsense_mediated_decay gene_symbol:INO80B-WBP1 description:INO80B-WBP1 readthrough (NMD candidate) [Source:HGNC Symbol;Acc:HGNC:49199]	FALSE	TRUE	9.64187	2	2	2	High	High	High	High	Phospho [S63(100); S132(100)]	8.48
High	ENSP00000339090.4	pep chromosome:GRCh38:X:130401987:130413656:1 gene:ENSG00000134597.16 transcript:ENST00000305536.11 gene_biotype:protein_coding transcript_biotype:protein_coding gene_symbol:RBMX2 description:RNA binding motif protein X-linked 2 [Source:HGNC Symbol;Acc:HGNC:24282]	FALSE	TRUE	4.03727	1	11	1	High	High	High	High	Phospho [S187(95)]	12.21
High	ENSP00000297185.3	pep chromosome:GRCh38:5:138553756:138575401:-1 gene:ENSG00000113013.15 transcript:ENST00000297185.9 gene_biotype:protein_coding transcript_biotype:protein_coding gene_symbol:HSPA9 description:heat shock protein family A (Hsp70) member 9 [Source:HGNC Symbol;Acc:HGNC:5244]	FALSE	TRUE	6.77467	4	4	3	High	High	High	High	Phospho [S664(85.7)]	9
High	ENSP00000420294.1	pep chromosome:GRCh38:3:170087584:170181733:-1 gene:ENSG00000173889.16 transcript:ENST00000495893.7 gene_biotype:protein_coding transcript_biotype:protein_coding gene_symbol:PHC3 description:polyhomeotic homolog 3 [Source:HGNC Symbol;Acc:HGNC:15682]	FALSE	TRUE	2.71357	2	6	2	High	High	High	High	Phospho [S275(100); T621(100)]	7.56
High	ENSP00000443287.1	pep chromosome:GRCh38:12:66302580:66343643:1 gene:ENSG00000127311.9 transcript:ENST00000545134.1 gene_biotype:protein_coding transcript_biotype:nonsense_mediated_decay gene_symbol:HELB description:DNA helicase B [Source:HGNC Symbol;Acc:HGNC:17196]	FALSE	TRUE	1.10396	1	3	1	High	High	High	High	Phospho [S1048(100)]	5.56
High	ENSP00000387071.1	pep chromosome:GRCh38:2:64551475:64592035:1 gene:ENSG00000119844.15 transcript:ENST00000409933.5 gene_biotype:protein_coding transcript_biotype:protein_coding gene_symbol:AFTPH description:aftiphilin [Source:HGNC Symbol;Acc:HGNC:25951]	FALSE	TRUE	2.77778	2	5	2	High	High	High	High	Phospho [S382(100)]	8.05
High	ENSP00000331602.3	pep chromosome:GRCh38:3:53161209:53192717:1 gene:ENSG00000163932.15 transcript:ENST00000330452.8 gene_biotype:protein_coding transcript_biotype:protein_coding gene_symbol:PRKCD description:protein kinase C delta [Source:HGNC Symbol;Acc:HGNC:9399]	FALSE	TRUE	2.95858	1	4	1	High	High	High	High	Phospho [S506(93)]	9.55
High	ENSP00000252818.3	pep chromosome:GRCh38:19:18279694:18281622:-1 gene:ENSG00000130522.6 transcript:ENST00000252818.5 gene_biotype:protein_coding transcript_biotype:protein_coding gene_symbol:JUND description:JunD proto-oncogene, AP-1 transcription factor subunit [Source:HGNC Symbol;Acc:HGNC:6206]	FALSE	TRUE	18.4438	3	5	3	High	High	High	High	Phospho [S90(100); S100(100); S255(100)]	12.45
High	ENSP00000423418.1	pep chromosome:GRCh38:3:154121390:154257825:1 gene:ENSG00000114790.13 transcript:ENST00000465093.6 gene_biotype:protein_coding transcript_biotype:protein_coding gene_symbol:ARHGEF26 description:Rho guanine nucleotide exchange factor 26 [Source:HGNC Symbol;Acc:HGNC:24490]	FALSE	TRUE	1.49254	1	2	1	High	High	High	High	Phospho [S392(100)]	7.47
High	ENSP00000434147.1	pep chromosome:GRCh38:1:201483979:201496573:-1 gene:ENSG00000159176.14 transcript:ENST00000532460.5 gene_biotype:protein_coding transcript_biotype:protein_coding gene_symbol:CSRP1 description:cysteine and glycine rich protein 1 [Source:HGNC Symbol;Acc:HGNC:2469]	FALSE	TRUE	7.77202	1	2	1	High	High	High	High	Phospho [S192(100)]	8.03
High	ENSP00000222247.4	pep chromosome:GRCh38:19:17859910:17863319:1 gene:ENSG00000105640.13 transcript:ENST00000222247.10 gene_biotype:protein_coding transcript_biotype:protein_coding gene_symbol:RPL18A description:ribosomal protein L18a [Source:HGNC Symbol;Acc:HGNC:10311]	FALSE	TRUE	14.7727	2	3	2	High	High	High	High	Phospho [S71(100); S123(100)]	6.15
High	ENSP00000348596.5	pep chromosome:GRCh38:4:75949915:75990945:-1 gene:ENSG00000198301.12 transcript:ENST00000356260.10 gene_biotype:protein_coding transcript_biotype:protein_coding gene_symbol:SDAD1 description:SDA1 domain containing 1 [Source:HGNC Symbol;Acc:HGNC:25537]	FALSE	TRUE	2.62009	2	3	2	High	High	High	High	Phospho [S585(100)]	9.17
High	ENSP00000453081.1	pep chromosome:GRCh38:15:70049091:70096851:-1 gene:ENSG00000140332.16 transcript:ENST00000559929.5 gene_biotype:protein_coding transcript_biotype:protein_coding gene_symbol:TLE3 description:TLE family member 3, transcriptional corepressor [Source:HGNC Symbol;Acc:HGNC:11839]	FALSE	TRUE	4.34783	2	5	2	High	High	High	High	Phospho [S213(100)]	7.66
High	ENSP00000488265.1	pep chromosome:GRCh38:1:145921632:145927447:-1 gene:ENSG00000265241.6 transcript:ENST00000632555.1 gene_biotype:protein_coding transcript_biotype:protein_coding gene_symbol:RBM8A description:RNA binding motif protein 8A [Source:HGNC Symbol;Acc:HGNC:9905]	FALSE	TRUE	20.1149	3	5	3	High	High	High	High	Phospho [S42(100); S56(100); S166(100); S168(100)]	4.25
High	ENSP00000323782.7	pep chromosome:GRCh38:17:44677440:44689776:-1 gene:ENSG00000180329.14 transcript:ENST00000315286.13 gene_biotype:protein_coding transcript_biotype:protein_coding gene_symbol:CCDC43 description:coiled-coil domain containing 43 [Source:HGNC Symbol;Acc:HGNC:26472]	FALSE	TRUE	15.1786	1	2	1	High	High	High	High	Phospho [T139(99.9)]	8.59
High	ENSP00000367787.3	pep chromosome:GRCh38:17:34980512:35009743:1 gene:ENSG00000005156.12 transcript:ENST00000378526.9 gene_biotype:protein_coding transcript_biotype:protein_coding gene_symbol:LIG3 description:DNA ligase 3 [Source:HGNC Symbol;Acc:HGNC:6600]	FALSE	TRUE	1.78394	2	4	2	High	High	High	High	Phospho [T191(100); S210(100)]	8.45
High	ENSP00000362153.3	pep chromosome:GRCh38:1:37566816:37595937:-1 gene:ENSG00000134697.13 transcript:ENST00000373062.8 gene_biotype:protein_coding transcript_biotype:protein_coding gene_symbol:GNL2 description:G protein nucleolar 2 [Source:HGNC Symbol;Acc:HGNC:29925]	FALSE	TRUE	2.73598	1	5	1	High	High	High	High	Phospho [S580(96.6)]	9.84
High	ENSP00000263713.5	pep chromosome:GRCh38:2:120013077:120179119:1 gene:ENSG00000115109.14 transcript:ENST00000263713.10 gene_biotype:protein_coding transcript_biotype:protein_coding gene_symbol:EPB41L5 description:erythrocyte membrane protein band 4.1 like 5 [Source:HGNC Symbol;Acc:HGNC:19819]	FALSE	TRUE	2.59209	2	3	2	High	High	High	High	Phospho [S366(87); S517(100)]	6.64
High	ENSP00000419060.2	pep chromosome:GRCh38:7:140719327:140924810:-1 gene:ENSG00000157764.13 transcript:ENST00000496384.7 gene_biotype:protein_coding transcript_biotype:protein_coding gene_symbol:BRAF description:B-Raf proto-oncogene, serine/threonine kinase [Source:HGNC Symbol;Acc:HGNC:1097]	FALSE	TRUE	5.73664	2	3	2	High	High	High	High	Phospho [T401(100); S446(93.3)]	8.67
High	ENSP00000333938.7	pep chromosome:GRCh38:1:77888628:77943224:1 gene:ENSG00000162614.18 transcript:ENST00000334785.11 gene_biotype:protein_coding transcript_biotype:protein_coding gene_symbol:NEXN description:nexilin F-actin binding protein [Source:HGNC Symbol;Acc:HGNC:29557]	FALSE	TRUE	2.07407	1	3	1	High	High	High	High	Phospho [S80(100)]	10.96
High	ENSP00000354518.3	pep chromosome:GRCh38:17:34961540:34963777:1 gene:ENSG00000198783.6 transcript:ENST00000361952.5 gene_biotype:protein_coding transcript_biotype:protein_coding gene_symbol:ZNF830 description:zinc finger protein 830 [Source:HGNC Symbol;Acc:HGNC:28291]	FALSE	TRUE	6.1828	1	2	1	High	High	High	High	Phospho [S351(100)]	7.44
High	ENSP00000355827.5	pep chromosome:GRCh38:1:224114111:224162047:1 gene:ENSG00000143756.12 transcript:ENST00000366862.10 gene_biotype:protein_coding transcript_biotype:protein_coding gene_symbol:FBXO28 description:F-box protein 28 [Source:HGNC Symbol;Acc:HGNC:29046]	FALSE	TRUE	11.9565	2	3	2	High	High	High	High	Phospho [S344(100)]	10.24
High	ENSP00000463379.1	pep chromosome:GRCh38:18:49481681:49491586:-1 gene:ENSG00000215472.10 transcript:ENST00000584895.5 gene_biotype:protein_coding transcript_biotype:protein_coding gene_symbol:RPL17-C18orf32 description:RPL17-C18orf32 readthrough [Source:HGNC Symbol;Acc:HGNC:44661]	FALSE	TRUE	17.1053	3	4	2	High	High	High	High	Phospho [S142(94.1)]	7.99
High	ENSP00000452219.1	pep chromosome:GRCh38:6:11094231:11135811:1 gene:ENSG00000224531.6 transcript:ENST00000376935.4 gene_biotype:protein_coding transcript_biotype:nonsense_mediated_decay gene_symbol:SMIM13 description:small integral membrane protein 13 [Source:HGNC Symbol;Acc:HGNC:27356]	FALSE	TRUE	32.967	1	2	1	High	High	High	High	Phospho [S58(98.2); S60(98.2)]	9.37
High	ENSP00000417864.2	pep chromosome:GRCh38:15:68778535:68820895:-1 gene:ENSG00000140350.15 transcript:ENST00000465139.6 gene_biotype:protein_coding transcript_biotype:protein_coding gene_symbol:ANP32A description:acidic nuclear phosphoprotein 32 family member A [Source:HGNC Symbol;Acc:HGNC:13233]	FALSE	TRUE	11.245	4	6	4	High	High	High	High	Phospho [T15(93.6); S27(100)]	9.04
High	ENSP00000318012.8	pep chromosome:GRCh38:9:128689226:128696388:1 gene:ENSG00000119335.16 transcript:ENST00000322030.12 gene_biotype:protein_coding transcript_biotype:protein_coding gene_symbol:SET description:SET nuclear proto-oncogene [Source:HGNC Symbol;Acc:HGNC:10760]	FALSE	TRUE	11.9134	2	3	2	High	High	High	High	Phospho [S24(85)]	11.07
High	ENSP00000480291.1	pep chromosome:GRCh38:17:37686431:37745059:-1 gene:ENSG00000275410.5 transcript:ENST00000617811.5 gene_biotype:protein_coding transcript_biotype:protein_coding gene_symbol:HNF1B description:HNF1 homeobox B [Source:HGNC Symbol;Acc:HGNC:11630]	FALSE	TRUE	3.94973	1	3	1	High	High	High	High	Phospho [S75(100); S80(100)]	9.33
High	ENSP00000227471.3	pep chromosome:GRCh38:11:67991100:68004097:-1 gene:ENSG00000110057.8 transcript:ENST00000227471.7 gene_biotype:protein_coding transcript_biotype:protein_coding gene_symbol:UNC93B1 description:unc-93 homolog B1, TLR signaling regulator [Source:HGNC Symbol;Acc:HGNC:13481]	FALSE	TRUE	9.54774	2	2	2	High	High	High	High	Phospho [S547(99.9); S550(100)]	6.61
High	ENSP00000371983.3	pep chromosome:GRCh38:4:7763624:7872082:-1 gene:ENSG00000196526.10 transcript:ENST00000382543.3 gene_biotype:protein_coding transcript_biotype:protein_coding gene_symbol:AFAP1 description:actin filament associated protein 1 [Source:HGNC Symbol;Acc:HGNC:24017]	FALSE	TRUE	2.82555	2	7	2	High	High	High	High	Phospho [S752(99.4); S795(93.6)]	9.93
High	ENSP00000361777.4	pep chromosome:GRCh38:9:128683655:128696400:1 gene:ENSG00000119335.16 transcript:ENST00000372692.8 gene_biotype:protein_coding transcript_biotype:protein_coding gene_symbol:SET description:SET nuclear proto-oncogene [Source:HGNC Symbol;Acc:HGNC:10760]	FALSE	TRUE	3.44828	2	8	2	High	High	High	High	Phospho [S7(100)]	10.4
High	ENSP00000402527.2	pep chromosome:GRCh38:6:75601880:75718281:1 gene:ENSG00000112701.18 transcript:ENST00000447266.7 gene_biotype:protein_coding transcript_biotype:protein_coding gene_symbol:SENP6 description:SUMO specific peptidase 6 [Source:HGNC Symbol;Acc:HGNC:20944]	FALSE	TRUE	1.88849	1	2	1	High	High	High	High	Phospho [S352(100)]	8.47
High	ENSP00000373930.3	pep chromosome:GRCh38:8:22605038:22620471:1 gene:ENSG00000158941.16 transcript:ENST00000389279.7 gene_biotype:protein_coding transcript_biotype:protein_coding gene_symbol:CCAR2 description:cell cycle and apoptosis regulator 2 [Source:HGNC Symbol;Acc:HGNC:23360]	FALSE	TRUE	5.6338	2	4	2	High	High	High	High	Phospho [S681(99.5)]	9.03
High	ENSP00000478171.1	pep chromosome:GRCh38:19:4909430:4962150:1 gene:ENSG00000276043.5 transcript:ENST00000620565.4 gene_biotype:protein_coding transcript_biotype:protein_coding gene_symbol:UHRF1 description:ubiquitin like with PHD and ring finger domains 1 [Source:HGNC Symbol;Acc:HGNC:12556]	FALSE	TRUE	4.43407	3	4	3	High	High	High	High	Phospho [S155(99.9); S351(100)]	7.57
High	ENSP00000358817.3	pep chromosome:GRCh38:1:109910899:109926743:1 gene:ENSG00000184371.14 transcript:ENST00000369802.7 gene_biotype:protein_coding transcript_biotype:protein_coding gene_symbol:CSF1 description:colony stimulating factor 1 [Source:HGNC Symbol;Acc:HGNC:2432]	FALSE	TRUE	3.2491	1	2	1	High	High	High	High	Phospho [S533(100)]	8.05
High	ENSP00000481504.1	pep chromosome:GRCh38:CHR_HSCHR17_7_CTG4:36487007:36496194:1 gene:ENSG00000278574.4 transcript:ENST00000620508.4 gene_biotype:protein_coding transcript_biotype:protein_coding gene_symbol:ZNHIT3 description:zinc finger HIT-type containing 3 [Source:HGNC Symbol;Acc:HGNC:12309]	FALSE	TRUE	21.2903	2	2	2	High	High	High	High	Phospho [S80(99.9)]	7.76
High	ENSP00000258960.2	pep chromosome:GRCh38:17:45061317:45109016:1 gene:ENSG00000136448.12 transcript:ENST00000258960.7 gene_biotype:protein_coding transcript_biotype:protein_coding gene_symbol:NMT1 description:N-myristoyltransferase 1 [Source:HGNC Symbol;Acc:HGNC:7857]	FALSE	TRUE	5.44355	2	4	2	High	High	High	High	Phospho [S47(100); S69(95.2)]	9.86
High	ENSP00000447057.1	pep chromosome:GRCh38:12:104986316:105017625:1 gene:ENSG00000151131.11 transcript:ENST00000552951.7 gene_biotype:protein_coding transcript_biotype:protein_coding gene_symbol:C12orf45 description:chromosome 12 open reading frame 45 [Source:HGNC Symbol;Acc:HGNC:28628]	FALSE	TRUE	11.8919	3	7	3	High	High	High	High	Phospho [S178(100)]	8.02
High	ENSP00000430355.1	pep chromosome:GRCh38:8:38757281:38836291:1 gene:ENSG00000147526.20 transcript:ENST00000522904.5 gene_biotype:protein_coding transcript_biotype:protein_coding gene_symbol:TACC1 description:transforming acidic coiled-coil containing protein 1 [Source:HGNC Symbol;Acc:HGNC:11522]	FALSE	TRUE	8.43806	2	7	1	High	High	High	High	Phospho [S27(100); S277(100)]	11.09
High	ENSP00000311713.3	pep chromosome:GRCh38:3:38165537:38255484:1 gene:ENSG00000172939.9 transcript:ENST00000311806.8 gene_biotype:protein_coding transcript_biotype:protein_coding gene_symbol:OXSR1 description:oxidative stress responsive kinase 1 [Source:HGNC Symbol;Acc:HGNC:8508]	FALSE	TRUE	3.98482	1	3	1	High	High	High	High	Phospho [S339(100)]	13.24
High	ENSP00000350170.3	pep chromosome:GRCh38:3:180912670:180982753:1 gene:ENSG00000114416.18 transcript:ENST00000357559.9 gene_biotype:protein_coding transcript_biotype:protein_coding gene_symbol:FXR1 description:FMR1 autosomal homolog 1 [Source:HGNC Symbol;Acc:HGNC:4023]	FALSE	TRUE	4.02576	1	2	1	High	High	High	High	Phospho [S406(100); S409(99.9)]	5.31
High	ENSP00000402849.3	pep chromosome:GRCh38:3:50287732:50292595:-1 gene:ENSG00000214706.10 transcript:ENST00000417626.6 gene_biotype:protein_coding transcript_biotype:protein_coding gene_symbol:IFRD2 description:interferon related developmental regulator 2 [Source:HGNC Symbol;Acc:HGNC:5457]	FALSE	TRUE	3.75494	1	4	1	High	High	High	High	Phospho [S95(100); S96(100)]	10.37
High	ENSP00000360497.2	pep chromosome:GRCh38:X:119870475:119871733:-1 gene:ENSG00000125352.6 transcript:ENST00000371442.4 gene_biotype:protein_coding transcript_biotype:protein_coding gene_symbol:RNF113A description:ring finger protein 113A [Source:HGNC Symbol;Acc:HGNC:12974]	FALSE	TRUE	13.1195	2	3	2	High	High	High	High	Phospho [S85(91.3); S253(100)]	7.65
High	ENSP00000264025.3	pep chromosome:GRCh38:11:119660992:119729200:-1 gene:ENSG00000110400.11 transcript:ENST00000264025.8 gene_biotype:protein_coding transcript_biotype:protein_coding gene_symbol:NECTIN1 description:nectin cell adhesion molecule 1 [Source:HGNC Symbol;Acc:HGNC:9706]	FALSE	TRUE	4.64217	1	4	1	High	High	High	High	Phospho [S434(97.3)]	8.43
High	ENSP00000304978.6	pep chromosome:GRCh38:15:69414304:69448425:1 gene:ENSG00000137807.15 transcript:ENST00000352331.8 gene_biotype:protein_coding transcript_biotype:protein_coding gene_symbol:KIF23 description:kinesin family member 23 [Source:HGNC Symbol;Acc:HGNC:6392]	FALSE	TRUE	4.6729	2	4	2	High	High	High	High	Phospho [S160(100); S684(89)]	6.67
High	ENSP00000298281.4	pep chromosome:GRCh38:11:83156988:83187451:1 gene:ENSG00000165494.11 transcript:ENST00000298281.8 gene_biotype:protein_coding transcript_biotype:protein_coding gene_symbol:PCF11 description:PCF11 cleavage and polyadenylation factor subunit [Source:HGNC Symbol;Acc:HGNC:30097]	FALSE	TRUE	2.50804	3	3	3	High	High	High	High	Phospho [S511(87); S1520(100); T1530(99.3)]	5.94
High	ENSP00000262146.4	pep chromosome:GRCh38:8:65644734:65710562:1 gene:ENSG00000066855.16 transcript:ENST00000262146.9 gene_biotype:protein_coding transcript_biotype:protein_coding gene_symbol:MTFR1 description:mitochondrial fission regulator 1 [Source:HGNC Symbol;Acc:HGNC:29510]	FALSE	TRUE	6.00601	3	4	3	High	High	High	High	Phospho [S290(100); S331(99.7)]	5.55
High	ENSP00000327054.3	pep chromosome:GRCh38:19:2428166:2456959:-1 gene:ENSG00000176619.13 transcript:ENST00000325327.4 gene_biotype:protein_coding transcript_biotype:protein_coding gene_symbol:LMNB2 description:lamin B2 [Source:HGNC Symbol;Acc:HGNC:6638]	FALSE	TRUE	4.51613	3	5	1	High	High	High	High	Phospho [S37(92.1); S407(93.9)]	4.18
High	ENSP00000347427.6	pep chromosome:GRCh38:17:4833340:4898061:1 gene:ENSG00000141503.17 transcript:ENST00000355280.11 gene_biotype:protein_coding transcript_biotype:protein_coding gene_symbol:MINK1 description:misshapen like kinase 1 [Source:HGNC Symbol;Acc:HGNC:17565]	FALSE	TRUE	2.1021	2	4	2	High	High	High	High	Phospho [S601(100); S778(92.9)]	7.58
High	ENSP00000432082.1	pep chromosome:GRCh38:8:109550825:109564559:1 gene:ENSG00000147654.15 transcript:ENST00000531677.5 gene_biotype:protein_coding transcript_biotype:protein_coding gene_symbol:EBAG9 description:estrogen receptor binding site associated antigen 9 [Source:HGNC Symbol;Acc:HGNC:3123]	FALSE	TRUE	7.75194	1	2	1	High	High	High	High	Phospho [S36(100)]	3.87
High	ENSP00000377390.3	pep chromosome:GRCh38:11:68460770:68615331:1 gene:ENSG00000110075.14 transcript:ENST00000393801.7 gene_biotype:protein_coding transcript_biotype:protein_coding gene_symbol:PPP6R3 description:protein phosphatase 6 regulatory subunit 3 [Source:HGNC Symbol;Acc:HGNC:1173]	FALSE	TRUE	3.52673	2	3	2	High	High	High	High	Phospho [T631(100); S651(100)]	12.35
High	ENSP00000317904.3	pep chromosome:GRCh38:19:48968130:48993309:-1 gene:ENSG00000104812.15 transcript:ENST00000323798.8 gene_biotype:protein_coding transcript_biotype:protein_coding gene_symbol:GYS1 description:glycogen synthase 1 [Source:HGNC Symbol;Acc:HGNC:4706]	FALSE	TRUE	1.89959	1	4	1	High	High	High	High	Phospho [S652(93.8)]	6.38
High	ENSP00000222330.3	pep chromosome:GRCh38:19:42230190:42242602:-1 gene:ENSG00000105723.12 transcript:ENST00000222330.8 gene_biotype:protein_coding transcript_biotype:protein_coding gene_symbol:GSK3A description:glycogen synthase kinase 3 alpha [Source:HGNC Symbol;Acc:HGNC:4616]	FALSE	TRUE	2.27743	1	7	1	High	High	High	High	Phospho [Y279(99.9)]	16.7
High	ENSP00000281416.7	pep chromosome:GRCh38:2:190435895:190502315:1 gene:ENSG00000151690.15 transcript:ENST00000281416.11 gene_biotype:protein_coding transcript_biotype:protein_coding gene_symbol:MFSD6 description:major facilitator superfamily domain containing 6 [Source:HGNC Symbol;Acc:HGNC:24711]	FALSE	TRUE	1.51707	1	3	1	High	High	High	High	Phospho [T10(100)]	12.9
High	ENSP00000264110.2	pep chromosome:GRCh38:2:175072259:175168203:-1 gene:ENSG00000115966.17 transcript:ENST00000264110.7 gene_biotype:protein_coding transcript_biotype:protein_coding gene_symbol:ATF2 description:activating transcription factor 2 [Source:HGNC Symbol;Acc:HGNC:784]	FALSE	TRUE	2.9703	2	2	2	High	High	High	High	Phospho [S112(100)]	5.17
High	ENSP00000219548.4	pep chromosome:GRCh38:16:680410:682801:1 gene:ENSG00000103266.11 transcript:ENST00000219548.9 gene_biotype:protein_coding transcript_biotype:protein_coding gene_symbol:STUB1 description:STIP1 homology and U-box containing protein 1 [Source:HGNC Symbol;Acc:HGNC:11427]	FALSE	TRUE	5.94059	2	3	2	High	High	High	High	Phospho [S19(100)]	4.88
High	ENSP00000341171.6	pep chromosome:GRCh38:16:70661204:70686053:-1 gene:ENSG00000132613.15 transcript:ENST00000338779.11 gene_biotype:protein_coding transcript_biotype:protein_coding gene_symbol:MTSS2 description:MTSS I-BAR domain containing 2 [Source:HGNC Symbol;Acc:HGNC:25094]	FALSE	TRUE	5.89023	2	2	2	High	High	High	High	Phospho [T260(100); S264(99); S612(100)]	7.7
High	ENSP00000359665.3	pep chromosome:GRCh38:10:97640686:97676434:1 gene:ENSG00000155252.13 transcript:ENST00000370631.3 gene_biotype:protein_coding transcript_biotype:protein_coding gene_symbol:PI4K2A description:phosphatidylinositol 4-kinase type 2 alpha [Source:HGNC Symbol;Acc:HGNC:30031]	FALSE	TRUE	6.68058	2	5	2	High	High	High	High	Phospho [S47(100); S51(100); S462(91.2)]	7.56
High	ENSP00000359552.3	pep chromosome:GRCh38:1:88684273:88836255:1 gene:ENSG00000065243.20 transcript:ENST00000370521.8 gene_biotype:protein_coding transcript_biotype:protein_coding gene_symbol:PKN2 description:protein kinase N2 [Source:HGNC Symbol;Acc:HGNC:9406]	FALSE	TRUE	1.42276	1	3	1	High	High	High	High	Phospho [S583(94)]	8.42
High	ENSP00000294244.3	pep chromosome:GRCh38:11:63813456:63827716:1 gene:ENSG00000168005.9 transcript:ENST00000294244.9 gene_biotype:protein_coding transcript_biotype:protein_coding gene_symbol:SPINDOC description:spindlin interactor and repressor of chromatin binding [Source:HGNC Symbol;Acc:HGNC:25115]	FALSE	TRUE	10.4987	2	4	2	High	High	High	High	Phospho [S148(100); S152(98.5); S308(99.2)]	8.39
High	ENSP00000382595.3	pep chromosome:GRCh38:4:56436138:56461361:1 gene:ENSG00000128050.8 transcript:ENST00000399688.7 gene_biotype:protein_coding transcript_biotype:protein_coding gene_symbol:PAICS description:phosphoribosylaminoimidazole carboxylase and phosphoribosylaminoimidazolesuccinocarboxamide synthase [Source:HGNC Symbol;Acc:HGNC:8587]	FALSE	TRUE	3.00926	2	3	2	High	High	High	High	Phospho [S27(100)]	5.81
High	ENSP00000444029.1	pep chromosome:GRCh38:6:17615035:17706834:-1 gene:ENSG00000124789.11 transcript:ENST00000537253.5 gene_biotype:protein_coding transcript_biotype:protein_coding gene_symbol:NUP153 description:nucleoporin 153 [Source:HGNC Symbol;Acc:HGNC:8062]	FALSE	TRUE	1.59363	2	3	2	High	High	High	High	Phospho [S192(100); S209(99.8)]	7.88
High	ENSP00000495102.1	pep chromosome:GRCh38:CHR_HG2419_PATCH:144393318:144409288:-1 gene:ENSG00000285049.2 transcript:ENST00000643746.1 gene_biotype:protein_coding transcript_biotype:protein_coding gene_symbol:CPSF1 description:cleavage and polyadenylation specific factor 1 [Source:HGNC Symbol;Acc:HGNC:2324]	FALSE	TRUE	2.7027	1	4	1	High	High	High	High	Phospho [S758(96.1)]	11.06
High	ENSP00000305193.3	pep chromosome:GRCh38:2:20617818:20651098:-1 gene:ENSG00000118960.13 transcript:ENST00000304031.8 gene_biotype:protein_coding transcript_biotype:protein_coding gene_symbol:HS1BP3 description:HCLS1 binding protein 3 [Source:HGNC Symbol;Acc:HGNC:24979]	FALSE	TRUE	5.35714	1	2	1	High	High	High	High	Phospho [S194(100)]	8.73
[truncated: 1,125 more rows]
